# Supplementary material for: Phylogenetic characterization and promoter expression analysis of a novel hybrid protein disulfide isomerase/cargo receptor subfamily unique to plants and chromalveolates
Source: PubMed Central journal article supplement (PMC4729789; doi:10.1007/s00438-015-1106-7), 2015-08-25
Supplement: 438_2015_1106_MOESM1_ESM.pdf [file 438_2015_1106_MOESM1_ESM.pdf]

## Plant Erv41p/Erv46p Homologs

### NCBI Reference Sequence: NP\_001154394.1

>A.thalianaERV-A1  
MAGILNKLRLNDAYPKINEDFYRSRTLSGGVITLLSSVVMFLFFSELRLYLHTVTETKLIIVDTSRGETLRI  
NFDITFPALACSIILSVDAMDISGELHLDVKHDI IKRRLDSNGNTIEARQDGI GATKIENPLQKHGGRLGHN  
ETYCGSCYGAEAEHDCNCSCEDVREAYRKKGWGVTPNDLIDQCKREGFLQRVKDEEGEGCNIYGFLEVNK  
VAGNFHFAPGKSFHQSGVHVHDL LAFQKDSFNISHKINRLTYGDYFPGVVNPLDKVEWSQDTPNAMYQYFI  
KVVPTVYTDIRGHTIQSNQFSVTEHVKSSEAGQLQSLPGVFFFYDLSPKIVTFTTEHISFLHFLTNTVCAIV  
GGVFTVSGIIDAFAIYHGQKAIKKKMEIGKFS

### NCBI Reference Sequence: NP\_564162.1

>A.thalianaERV-A2  
MVGVMNRLRLNDAYPKINEDFYRRTLSGGVITLASSIVMLILFFSELQLYIHPVTETQLRVVDSRGEKLR  
NFDVTFPALQCSIIISLSDMISGERHLDVRHDI IKRRLDSSGNVIEAKQDGI GHTKIEKPLQKHGGRLGHN  
ETYCGSCFCGAEASDDACCNSCEEVREAYRKKGWALSDPESIDQCKREGFVQKVKDEEGEGCNIYGFLEVNK  
VAGNFHFIPGQSFHQSGFQFHDMLLFQQGNYNISHKVNRLAFGDFFPGVVNPLDGVQWNQKQSGVYQYFI  
KVVPSIYTDVHQNTIQSNQFSVTEHFQNM EAGRMQSPPGVFFFYDLSPKIVIFEEQHVEFLHFLTNTVCAIV  
GGIFTVSGIVDSFIYHGQRAIKKKMEIGKFN

### NCBI Reference Sequence: NP\_188868.2

>A.thalianaERV-B  
MGVKQALRSIDAFPRAEHLLQKTQSGAVVSIVGLLIMATLFLHELSSYLLNTLTVHQMSVDLKRGETLPIH  
VNMTFPLPCDVLSDAIDMSGKHEVDLDTNIWKLRLNSHGHIIGTEYISDLVEKGHEHGHS PHKHDGKEE  
HKNETETEALNILGFDQAAETMIKKVKQALADGEGCRVYGVLDVQRVAGNFHISVHGLNIYVAQMI FGGSK  
NVNVSHMIHDL SFGPKYPGIHNPLDDTNRILHDTSGTFKYYIKIVPTEYRYLSKDVLS TNQYSVTEYFTPM  
TEFDRTPAVYFLYDLSPITVTTIKEERSFLHLITRLCAVLGGTFALTGMLDRWMMFRFIESFNKKPSTRA

### NCBI Reference Sequence: NP\_567765.2

>A.thalianaPDI7  
MVSTSKIKSVD FYRKIPRDLTEASLSGAGLSIIAALSMI FLFGMELNNYLAVSTSTSVIVDRSADGDFLRL  
DFNISFPALSCEFASVDVSDVLGTNRLNVTKTIRKFSIDSNMRPTGSEFHAGEVLSLINHGDETGEEIVED  
SVPLTGRNFDTFTTHQFPILVVNFYAPWCYWCNLLKPSWEKAAKQIKERYDPEMDGRVILAKVDCTQEGDLC  
RRNLIQGYPSIRIFRKGSDLDKDDNAHHDHESYGGDRDTESLVKMVSLSLVEPIHLEPHNLALEDKSDNSRT  
LKKAPSTGGCRVEGYMRVKVPGNL MVSARS GSHSFDSSQMNMSHVVNHL SFGRRIMPQKFSFKRLSPYL  
GLSHDRDLGRSFINQRDLGPNVTIEHYLQIVKTEVVKSNQALVEAYEYTAHSSVAHSYLLPVAKFHFELS  
PMQVLTITENSKSFSHFITNVCAIIGGVFTVAGILDSILHHSMTLMKKIELGKNF

### NCBI Reference Sequence: NP\_566664.1

>A.thalianaPDI12  
MVSSTKLKSVDFYRKIPRDLTEASLSGAGLSIVAALFMMFLFGMELSSYLEVNTTTAVIVDKSSDGDGFLRI  
DFNISFPALSCEFASVDVSDVLGTNRLNITKTVRKFPIDPHLRSTGAEFHSGLALHNINHGDETKEEFPDG  
AIPLTSASFEALSHHFPILVVNFNAPWCYWSNRLKPSWEKAANI IKQRYDPEADGRVLLGNVDCTEEPALC  
KRNHIQGYPSIRIFRKGSDLDREHGHHEHESYGGDRDTSIVKMVEGLVAPIHPETHKVALDGKSNDTVKH  
LKKGPVTGGCRVEGYVRVKVPGNLVISAHSGAHSFDSSQMNMSHVVS HFSFGRMISPRLLTDMKRLLPYL  
GLSHDRDLGKAFINQHEFGANVTIEHYLQIVKTEVITRRSGQEHSLIEEY EYTAHSSVAQTYLLPVAKFHF  
ELSPMQILITENPKSFSHFITNLCAIIGGVFTVAGILDSIFHNTVRLVKKVELGKNI

### NCBI Reference Sequence: NP\_175508.2

>A.thalianaPDI13  
MVSTSKIKSVD FYRKIPRDLTEASLSGAGLSIVAALAMFLFGMELSSYLAINSTSTSVIVDKSSDGDGFLNI  
DFNISFPALSCEFASVDVSDVFGTHRLNISKTIKRVPI DPHLRATAEEFHSTSDLHLINHGDEHGDNSTY  
ADIPLTGAAFEKFTHHFQILVVNFYAPWCYWSNRLKPSWVKASQITRERYNPGTDDRVLGSDVDCTEEPTL  
CKSNHIQGYPSIRIFRSGSLREDHGNHEHESYGGDRDTSLVKMVEELLKPIKEDHKLALDGKSDNAAS  
TFKKAPVSGGCRIEGYVRAKKVPGELVISAHSGAHSFDASQMNMSHIVTHLTFGTMVSERLWTDKRLLPYL  
LGQSYDRNLNGKSFINERQLDANVTIEHYLQI IKTEVISRRSGQEHSLIEEY EYTAHSSVARSYHYPEAKFH  
FELSPMQVLISENPKSFSHFITNVCAIIGGVFTVAGILDSIFQNTVRMVKKIELGKNI

**NCBI Reference Sequence: XP\_003579883.1**

>B.distachyonERV-A1

MDGLMSKLRNLDAYPKVNEDFYSTRLSGGVITLASSFVMLLLFVSELRLYLHAVTETTLRVDTSRGEKLRINFDITFPALQCSIIISIDVMDISGQEHLVDVKHDVFKQRIDANGNVIATKQDAVGGMKVEKPLQMHGGRLEHNETYCGSCYGAEEPGEQCCNSCEDVREAYRKKKGWGSNPDSIDQCKREGFLQTIKDEEGEGCNIYGFVEINKVAGNFHFAPGKSFQQSNVHVHDLDPFQKDSFNVSHKINKLSFGPEFPGVVNPLDGAHWQHSFYQMYQYFVKVVPTVYSHINEQIILSNQFSVTEHARSSESVRMQLPGVFFFYDLSPKIVTFTTERHVSFLHFLTNTVCAIVGGVFTVSGIIDSFVYHGQRAITKKREIGKFN

**NCBI Reference Sequence: XP\_003558026.1**

>B.distachyonERV-A2

MDLWNKLRSLDAYPKVNEDFYSTRLSGGLITIASSLAAILLLFFSEIRLYLYSATESKLTVDTSRGERLHINFDTFPALPCSLVAIDTMDVSGEQHYDIRHDIKFKRIDHLGNVIESRKDGVGSPKIERPLQNHGGRLDHNEYAYCGSCYGSEESDDQCCNSCEEVRDAYRKKGWALTNVESIDQCKREGFVQRLKDEQEGECNIHGFVDVNVKAGNFHFAPGKHLQDSFNFLQDMLNFQPENYNISHKINKLSFGKEFPGVVNPLDGVVEWKQEQATGLTGMYYQYFVKVVPTIYTDIRGRKIHSNQFSVTEHFREAI GFPRPPPGVYFFYEFSPKIVDFTEENTSLHLHFLTNTICAVGGIFTVAGIIDSFVYHGHRAIKKKMEIGKLG

**NCBI Reference Sequence: XP\_003568216.1**

>B.distachyonERV-A3

MDGFLQKLKGLDAYPKVNEDFYKRTLSGGVVTLVSAVVMLLLFISSETSSYLNSATETKLVVDTSRGERLRVNFDTIFPSPICPTLLSVDTRDISGEQHDIRHDIEKKRLNSHGNVIESRKEGIGGAKIERPLQKHGGRLDKGEQYCGTCYGAEESEDEQCCNSCDEVREAYKKGWALTNPDLDIQCAREDFVERVKTQHGEGCSVHGFLDVSKVAGNFHFAPGRGFYESNVDVPELSSLEGGFNITHKINKLSFGTEFPGVVNPLDGAQWTQPASDGTYYQYFIKVVPTNYTDTRGRKIDSNOFSVTEHFRDGNVHPRPQPGVFFFYDFSPKIVIFTEENKSFHLHFLTNTLCAIVGGIFTVSGIIDSFIYHGQKALKKKMEIGKYR

**NCBI Reference Sequence: XP\_003558212.1**

>B.distachyonERV-B

MGRIPSLKFNFAFPHAEDHLLKKTYSGAIVTIFGLIIMFTLVFVHELKFYLTITYTMHQMSVDLKRGETLPIHINMSFPSLPCEVLSVDAIDMSGKHEVDLHTNIWKLRLDKYGTIIGTEYLSDLVEKEHGAHHHDNGHEHHDEEKKPEHTFNEDADKMVKSVRQALENGEGCRVYGMLDVQRVAGNFHISVHGLNIYVAEKIFEGSSHVNVSHVTHELSFGPKYPGIHNPLDDTTRILHDASGTFKYIYKVVPTIYRYLSKQVLPNTQFSVTEYFVPIRPAADRSWPAVYFLYDLSPITVTI KEERRNFLHFITRLCAVLGGTFAMTGMLDRWMYRIIESVSSSKPRSVLR

**NCBI Reference Sequence: XP\_010237612.1**

>B.distachyonPDI-C

MISSSKLKSVDYFARKIPRDLTEASLSGAGLSIVAALAMVFLFGMELSSYLAVNTTTSVIVDRSSDGEFLRIDFNMSFPALSCEFASVDVSDVLGTNRLNITKTVRKFSIDRNLVPTGSEFHS GPIPTVKNKHGDDVEEYHADGSVALSSRNFDYSYHQYPILVVNFYAPWCYWSNRLKPSWEKTAKI IKERYDPEMDGRILLAKVDCTEEGELCKRHHIQGYPSIRIFRKGSDMKENQGHHDHESYYGERDTSLVAAAMETYVGNLPKEAHMLALDDKSNKTVDP AKRPAPMTSGCRVEGFVRVKKVPGSVIISARSGSHSFDPQINVSHYVTQFSFGNRLSPNMFSELKRLIPYVGGHHDRLAGQSYIVKHGDNNANVTIEHYLQIVKTELVTLRSSKELKVFEYEYTAHSSLVHSFYVPVVKFHFEPSMQVLVTELPKSFSHFITNVCAIIGGVFTVAGILDSILHNTLRLVKKVELGKDI

**NCBI Reference Sequence: XP\_009107911.1**

>B.rapaERV-A1

MAGILNKLRLDAYPKINEDFYSTRLSGGVITLVSSVVMFLFFSELRLYLHVSVTETKLVVDTSRGETLRINFDMTFPALACSI LSVDAMDISGELHLDVKHDVVKRRLD SHGNIIESRQDGI GAAKIEKPLQKHGGRLEHNETYCGSCYGAEEAEHDCNSCEDVREAYRKKKGWGVTPNPDLDIQCKREGFLQRVKDEEGEGCNIYGFLEVNVK VAGNFHFAPGKSFHQGGVHVHDL LAFQKDSFNISHKINRLTFGDYFPGVVNPLDKVQWSQDTPNAMYQYFIKVVPTVYTDISGHTIQSNQFSVTEHVKSSEAGQLQSLPGVFFFYDLSPKIVTFTTEEHSFLHFLTNTVCAIVGGVFTVSGIIDAFAIYHGQKAIKKMEIGKFS

**NCBI Reference Sequence: XP\_009106456.1**

>B.rapaERV-A2

MAGVMNRLKNLDAYPKINDDFYSTRLSGGLITLASSLVMLILFFSELRLYLHPVTESQLRVDTSRGEKLRIN  
NFDATFPALACSIISLDSMDISGEQHLDRHRDMSKRRLDAYGNVIETRQDGIHTKIENPLQKHGGRLEHN  
ETFCGSCYGAEASDDECCNSCEEVREAYRKKGWAMTDPDIIDQCKREGFVQRVKEEEGEGCNI FGFLEVNK  
VAGSFHFVPGKTFRQSGFHLQDLLVFQGDSYNI SHKVNSLTFGDRFPGVNVNPLDGVQWTQETLNGMYQYFI  
KVVPTHEYTDVRGHVIQSNQFSVTEHFQKTEAGRTQSLPGVFFFYDLSPIKVI FTEQHVEFLHFLTNVCAIV  
GGIFTVSGIIDSFVYHGQRAIKKKMEIGKFG

**NCBI Reference Sequence: XP\_009103253.1**

>B.rapaERV-A3

MNRLRNLDAYPKINEDFYNRTLSSGGLITLFFSLLMLILFFSELRLYMHPVTETQLRVDTSRGEKLRINFDV  
TFPALQCSIISIDTMDISGERHLDRHDI IKRRLDSHGNVIESKQDGIHTKIEKPLQKHGGRLEHNETYC  
GSCFGAETDDTCCNSCEEVREAYRKKGWALSDPESIDQCKREGYVQKVKDEEGEGCNLHGFLEVNVKAVGN  
FHFVPGQSFHQSGFQFGDLIFFQGNYNISHKVNRLAFGDFFPVNVNPLDGVQWNQEKQNGVYQYFVKVVP  
SIYTDVHGHTIQSNQFSVTEHFQKMEAGRMQSPPGVFFFYDLSPIKVI FEEQHVEFLHFLTNVCAIVGGIF  
TVSGIVDSFIYHGQRAIKKKMEIGKFN

**NCBI Reference Sequence: XP\_009145365.1**

>B.rapaERV-A4

MNRLRNLDAYPKINEDFYKRTLSSGGVITLVSSVVMILILFFSELRLYMHPVTESHRLVDTTTRGEKLRINFDV  
TFPALQCSIISIDTMDISGERHLDRHDI FKRRLDSHGNI EAKQGGIHTKIEKPLQKHGGRLEDNEKYC  
GSCFGAETDDACCNSCEEVREAYRKKGWGLSDPESIDQCQREGYVQKVKDEEGEGCNVHGFVEVNVKAVGN  
FHFVPGQSFHQSGFQFHDMMIMFQQGNYNISHKVNRLAFGDFFPVNVNPLDGVQWNQDKQNGVYQYFIKVVVP  
TIYTDVHGHTIQSNQFSVTEHFQNAEAGRMQSPPGVFFFYDLSPIKVI FEEQHVEFLHFLTNVCAIVGGIF  
TVSGIVDSFIYHGQRAIKKKMEIGKFN

**NCBI Reference Sequence: XP\_009135799.1**

>B.rapaERV-B1

MGVKQALRSIDAFPRaedHLLQKTQSGAVVSI VGLLIMATLFLHELSSYLNLTLVHQMSVDLKRGETLPIH  
VNMTFPSLPCDVLSDAIDMSGKHEVDLDTNIWKLRLNSHGHI IGTEYISDLVEKEHDHSSSHKHGDKKEEHK  
NETEAVNTLGFDEAAETMIKKVKQALADGEGCRVYGVLDVQRVAGNFHVSVHGLNIYVAQMI FGGSKNVNV  
SHMIHDL SFGPKYPGIHNPLDDTNRILRDTSGTFKYI I KIVPTEYRYLSKDVLTTNQYSVTEYYTPMNEFD  
RTWPAVYFLYDLSPIVTVIKEERSFLHLITRLCAVLGGTFALTGMLDRWMMFRIIESFTKKPSTRS IHK

**NCBI Reference Sequence: XP\_009145393.1**

>B.rapaERV-B2

MGVKQALRSIDAFPRaedHLLQKTQSGAVVSI VGLLIMVILFLSELSSYLNLTLVHQMSVDLKRGETLPIH  
VNMTFPSLPCDVLSDAIDMSGKHEVDLDTNIWKLRLNSHGHI IGTEYISDLVEKEHDHSSSHKHDEHKNET  
DALNLLGFDEAAETMIKKVKQALADGEGCRVYGVLDVQRVAGNFHISVHGLNIYVAQMI FGGSKNVNVSHM  
IHDL SFGPKYPGIHNPLDGTNRILHDTSGTFKYI I KIVPTEYRYLSKDILTTNQYSVTEYYTPMNEFDRTW  
PAVYFLYDLSPIVTVIKEERSFLHLITRLCAVLGGTFALTGMLDRWMMFRIIESFTKKPSTRS IHK

**NCBI Reference Sequence: XP\_009145612.1**

>B.rapaPDI-C1

MVSPTKLKSMDFYRKIPRDLTEASLSGAGLSIVAALVMMLLFGMELSSYLAVNTTTAVVVDKSADGDFLRI  
HFNISFPALSCEFASVDVSDVLGTNRLNITKTIRKFPIDPHLKTGTGEEFHS GHGSHDINHGEETKEEIPDG  
SVPLVSSSFD SFSKHFPLLIVNFNAPWCYWSNRLKPSWEKASSIIYHKYNPETDGRVLLGSVDCTEEAELC  
KRNHIQGYPSIRIFRKGSDLKEDHGHHEHESYGGDRDTSIVKMVDELVAPIHPETHKLDLDGINSKTLKH  
LKKAPVTGGCRVEGYVRVKKVPGNLIISAHSGAHSFDSSKMNMSSHVSHLSFGRMFSRLLTDMRLLPYI  
GQSHDKLNEKAFINQHEFGANVTIEHYLQVVKTEVITRRTAQEHSLVEEYETAHSSIAQTYLPAVKFHF  
ELSPMQIMITENPKSFSHFITNLCAIIGGVFTVAGILDSIFHNTIRLVKKVELGKNF

**NCBI Reference Sequence: XP\_009135698.1**

>B.rapaPDI-C2

MVSPTKLKSVDFYRKIPRDLTEASLSGAGLSIVAALVMMLLFGMELSSYLEVTTTTAVVVDKSSDGDFLRI  
DFNISFPALSCEFASLDVNDVLGTNRLNITKTVRKFPIDPHLKATGGEFHSGLASHHINHGEIEIKQEFDPG  
AIQLTNGGFQSLSHHFP L L I V N F N A P W C Y W S N R L K P S W E K A A T I I K Q R Y N P D T D G R V L L G S V D C T E E P A L C  
RRNHIQGYPSIRIFRKGNDL KEDHGHHEHESYGGDRDTE SIVKMVDELVAPIHPETHKLALDWGISNDTAK

LLKKAPVTGGCRVEGYVRVKKVPGNLVISAHSGAHSFDSSQMNMSHVVTHLSFGRMIDTRLLTDLKRLLPY  
LGQSHDKLDEKAFINQHEFGANVTIEHYLQIVKTEVITRRYQGEHSLTEEHEYTAHSSITQTYLPAKHFH  
FELSPMQILITENPKSFSHFITNLCAIIGGVFTVAGIIDSVLHNTIRLIKKVELGKNI

**NCBI Reference Sequence: XP\_009137636.1**

>B.rapaPDI-C3

MVSTSRIKSVDFYRKIPRDLTEATLSGAGLSIVAALSMLFLFGMELNNYLAVSTTTTSIIIVDRSSDGDFLRM  
DFNISFPPLSCEFASVDVSDVLGTNRLNVTKTIRKFSIDSNLRPTGSEFHSGEVLSHVNHDEAGEEVEDS  
VSLTSRNFDTLLHQFPISVVNFYAPWCYWCNLLKPSWEKAQIKERYDPEMDGRVILAKVDCTQEADLCR  
KNHIQGYPSIRIFRQGSDLKDNAHHDHESYYGDRDTESLVKMVIIGLVEPIHLEPHKLALEDKSDNASKTLK  
KAPSTGGCRIEGYIRVKKVPGNLMVSARSQSHSFDSTQMNMSHVVNHL SFGRKILPQTFTDLKRLSPYLGQ  
SHDRLNRPFFINQRDLGPNVTIEHYLQIVKTEVLKSNGHAMVEEYETAHSSVAHSYYLPAKHFH  
FELSPMQVLITENSRSFSHFITNVCAIIGGVFTVAGILDSILHQTM TLMKKIELGKNF

**NCBI Reference Sequence: XP\_009109150.1**

>B.rapaPDI-C4

MISPRKIKSVDFYRKIPRDLTEASLSGAGLSIVAALSMLLLFGMELSSYLTVSTTTTSIIIDRSSDGDFLRM  
DFNISFPPLSCEFASVDVSDVLGTNRLNVTKTIRKFSIDSNLRPTGSEFHSGEFLSRVNHGDESAEELVEG  
SVSLGARNFDTFLHQYPIVVNFYAPWCYWCNLLKPSWEKAANQIKERYDPEMDGRVILAKVDCTQEADLC  
RRNHIQGYPSIRIFRKGSDLRDDNAHHDHESYYGDRDTESLVKMVIIGLVEPIHLEPHKLALEDKSGNASKT  
LKKAPSTGGCRIEGYMRVKKVPGNLMVSARSESHSFDTSQMNMSHVVNHL SFGRKILPEAFSDLKRLAPYL  
GGSHNRLDDRSFINQHDLGPNVTIEHYLQIVKTEVLKSNGHAMIEEYETAHSSVAHTYYLPAKHFH  
FELSPMQVLITENSRSFSHFITNVCAIIGGVFTVAGILDSILHQTM TLMKKIELGKNF

**NCBI Reference Sequence: XP\_009147793.1**

>B.rapaPDI-C5

MVSTTKIKSVDFYRKIPRDLTEASLSGAGLSIIAALAMMFLFGMELSTYLAVTTQTSVVVDNNSDDDFLQI  
DFNVSPALSCFATFEVSDVLSSTNRLNLTKTIKKVPIDPHLRDTGEEYHPTPDSDLINHGDEHDDNTYA  
AIPLSGGTDFDKISHKFPILVVNFYAPWCYWSRRLRPSWEKAAEITRQKYGPENDGRVLLGSDCTEETPLC  
TKYHIQGYPSIRIFHNQSDLRGDDGHQEHDSYHGDRDTESLVKMVEELLRPIKFFDGTNHAASRIRKAPV  
GGCRIEGYVRAKVPGEIIVSAVSGSHSFDASRMNMTHFVNHL SFGRILSDRLLTDMKRLPYLGLSHDR  
LNGKMFVNEGKFAANVTIEHYLQVVKTEVVSRRFQGEHVSIEEYETAHSSVAHGYYPVAKHFH  
FELSPMQVLISENPKSFSHFITNVCAIIGGVFTVAGILDSIFQSTYGMKKVELGKNF

**NCBI Reference Sequence: XP\_009144931.1**

>B.rapaPDI-C6

MVSTTKIKSVDFYRKIPRDLTEASLSGAGLSIIAALAMVFLFGMELSTYLAVTTNTSVIVDNSSDGDFLRI  
DFNVSPPLSCEFASVDVSNVLGTRKRLNLTKTIKKVPIDPYLRATGAEVHSTSGLHLINHGDEDHGNTYA  
AIPLTGATFDKFSHHFQILVVNFYAPWCYWSNRLKPSWEKAAEITRQRYNPETDGRVLLGSDCTEETPLC  
KRNHIQGYPSIRIFRKGSDLKEDHGHHEHESYHGDRDTE SILKMVEELLKPIKEDHKLALDGKTDNVVSG  
IKKAPVSGGCRIVGYVRAKVPGEIIISAHSGAHSFDASQMNMSHYVSHLTFGKMI SERLLTDMKRLMPYL  
GLSHDRLNSKWFVNEGQFAANVTIEHYLQVVKTEVVSRRFQGEHVSIEEYETAHSSVAHGYYPVAKHFH  
FELSPMQVLISENPKSFSHFITNVCAIIGGVFTVAGILDSIFQNTFRLVKKIELGKNI

**NCBI Reference Sequence: XP\_006305051.1**

>C.rubellaERV-A1

MAGILNKLRLNDAYPKINEDFYRSTLSGGVITLSSVVMFLFFSELRLYLHTVTETKLIVDTSRGETLRI  
NFDITFPALACSI LSV DAMDISGELHLDVKHDI IKRRLDSNGNTIEARQDGIGATKIEKPLQKHGGRLEHN  
ETYCGSCYGAEEAEHDCNCSCEDVREAYRKKGWGVTNPDLIDQCKREGFLQRVKDEEGEGCNIYGFLEVNK  
VAGNFHFAPGKSFHQSGVHVHDL LAFQKDSFNISHKINRLTYGDYFPGVVNPLDKVQWSQDTPNAMYQYFI  
KVVPTVYTDIRGHTIQSNQFSVTEHVKSSEAGQLQSLPGVFFFYDLSPIKVTFTEEHISFLHFLT  
NVCAIVGGVFTVSGIIDAFAIYHGQKAIKKMEIGKFN

**NCBI Reference Sequence: XP\_006305055.1**

>C.rubellaERV-A2

MVGVMNRLRLNDAYPKINEDFYRRTLSGGVITLVSSLLMLVLFSELQLYIHPVTETQLRVDTSRGEKLR  
NFDVTFPALQCSII SLSDMDSIGERHL DVRHDI IKRRLDSTGNVIEAKQDGIGHTKIEKPLQKHGGRLEHN

ETYCGSCFGAELSDACCNSCEEVREAYRKKGWALSDPESIDQCKREGFVQKVKDEEGEGCNIHGFLVFNK  
VAGNFHFIPGQSFHQSGFQFHDMLLFQOGNYNISHTVNRLAFGDFPPGVVNPLDGVQWNQGGKQSGVYQYFI  
KVVPSIYTDVHRNTIQSNQFSVTEHFQGM EAGRMQSPPGVFFYYDLSPKVI FEEQHVEFLHFLT NVCAIV  
GGIFTVSGILDSFIYHGQRAIKKKMEIGKFN

**NCBI Reference Sequence: XP\_006298011.1**

>C.rubellaERV-B  
MGVKQALRSIDAFPRaedHLLQKTQSGAVVSIVGLLIMATLFLHELSSYLNTLTVHQMSVDLKRGETLPIH  
VNMTFPSLPDVLSDVAIDMSGKHEVDLDTNIWKLRLNSHGHIIGTEYISDLVEKGEHGHSSHKHDGKEE  
HKNETEIEIETLNSLGFQAAETMIKKVKQALADGEGCRVYGVLDVQRVAGNFHISVHGLNIYVAQMIFFGGSK  
NVNVSHMIHDL SFGPKYPGIHNPLDDTNRMLHETSGETFKYIKIVPTEYRYLSKDVLTSTNQYSVTEYYTPM  
TDFDRTPAVYFLYDLSPITVTI KEERRSFLHLITRLCAVLGGTFALTGMLDRWFMRLIESFNKNTNTRSM  
H

**NCBI Reference Sequence: XP\_006297547.1**

>C.rubellaPDI-C1  
MVSSTKLKSVDFYRKIPRDLTEASLSGAGLSIVAALFMVFLFGMELSSYLEVNNTTTSVIVDKSTDGDFLRI  
DFNISFPALSCEFASVDVSDVLGTNRLNITKTIRKFPIDPHLRSTGAEFHSGHTLHHINHGEETKEEFPDG  
AIPLTSGSFESLSHHFPI LVVNFNAPWCYWSNRLKPSWEKAANI IKQKYDPETDGRVLLGNVDCTEEPALC  
KRNHIQGYPSIRIFRKGSDLREDHGHHEHESYYGDRDTSIVKMVDELVAIHPETHKVALDGKSNDTVKH  
LKKAPVTGGCRVEGYVRVKVPGNLVISAHSGAHSFDSSQMNMSHVSHLSFGRMISPRLTDMKRLLPYL  
GQSHDRLDGKAFINQHEFGANVTIEHYLQIVKTEVITRRSGLEQAVIEEYETAHSSVAQTYLPAKFHF  
ELSPMQILITEDPKSFSHFITNLCAIIGGVFTVAGILDSIFHNTIRLIKVELGKNI

**NCBI Reference Sequence: XP\_006283569.1**

>C.rubellaPDI-C2  
MVSTSKIKSVDFYRKIPRDLTEATLSGAGLSIIAALSMLFLFGMELNNYLAVSTSTSVIVDRSSDGDFLRL  
DFNISFPALSCEFASLDVSDVLGTNRLNVTKTIRKFSIDSNMRPTGAEFHAGEVLSLINHGDETGEEVAED  
SVSLTGRNFETFTHQFPILVVNFYAPWCYWCNLLKPSWEKAQIKERY-----  
---DPEMDGRVIVAKVDCTQEGDLRNRNHIQGYPSIRIFRKGSDLKDDNAHHEHESYYGDRDTESLVKMNV  
SLVEPIHLEPHNLALEDKSGNSSKTLKAPSTGGCRIEGYMRVKVPGNLMVSARSQSHSFDSSQMNMSHV  
VNHL SFGRRILPQKFSSELKRLSPYLGRNHDRLDGRPFINQRDLGPNVTIEHYLQIVKTEVVKSNQVLIIEE  
YEYTAHSSVAQSYLPAKFHFELSPMQVLITENSKSFSHFITNVCAIIGGVFTVAGILDSILHHTMTLMK  
KIELGKNF

**NCBI Reference Sequence: XP\_006307368.1**

>C.rubellaPDI-C3  
MVSTTKIKSVDFFRKIPRDLTEASLSGAGLSIVAALAMLFLFGMELSSYLAVNTSTSVIVDKSSDGDILNI  
DFNISFPALSCEFASVDVSDVLGTHRLNLTKTIRKVPIDPHLRATGTEFHSTSGHLINHGDEDHEENTYI  
DIPLTGATFEKYKHHFQILVVNFYAPWCYWSNRLKPSWEKASQITRERYDPETDDRVLGSDVCTKESTLC  
KSNHIQGYPSIRIFRKGSDLRDDHGHHDHESYYGDRDTSIVKMVEELLKPIKEDHKLALDGKSENAAST  
VKKAPVSGGRIEGYVRAKVP GELVISAHSGAHSFDASQMNMSHIVTHLTFGTMVSERLWTDKRLLPYL  
GQSHDRLNGKSFINQRQLDANVTIEHYLQIVKTEVISRRFGREHSLIEEYETAHNSVAHSYHYPEAKHFH  
ELSPMQVLISENPKSFSHFITNVCAIIGGVFTVAGILDSIFQNTVRLVKKIELGKNI

**NCBI Reference Sequence: XP\_004142610.1**

>C.sativusERV-A1  
MESLMNKIRKLDAYPKISEDFYNRTLSSGGFITIIASSIIMFLFFSELRLYVHTATETKLIVDTSRGEHLRI  
NFDVTFPALPCSVLSLHAMDISGEQHL DVKHDI VKKRIDYQGNVIDSRPDGIGSTEIERPLQKHGGRKQON  
ETYCGSCYGASGEDCCNSCQDVREAYHRKGWALSHPDLDQCKREGFFQRVKNEEGEGCNIYGFLEVNKVA  
GNFHFAPGRGFQLSYFQIHNPLASFQWDAFNISHRINRLTFGDDFPGVVNPLDGVQWNQGTLSGMFQYFIK  
VVPTVYKAVNGKAIKSNQFSVTQHRLRGIDGESFQALHGVFFYYDLSPKIVTFTEEHISFFHFLT NVCAIVG  
GVFTISGILDSIIYHGQKAIKKKMALGKFT

**NCBI Reference Sequence: XP\_004150658.1**

>C.sativusERV-A2

MDNII SKLRNLDAYPKINEDFY SRTL SGGVITLSSSILMLLLFISELR LYLHAVTETKLVVDTSRGETLRI  
NFDVTFPALPCSLLSLDAMDISGEQHL DVKHDI IKRRLDSHGNAIEARPDGIGAPKIEKPLQRHGGRL EHN  
ETYCGSCF GAESADDDCCNSCEEVREAYRKKGWALSNPDLIDQCKREGFLQRIKDEDEGEGCNIYGFLEVNK  
VAGNFHFAPGKSFQQSNVHVHDL LAFQKDSFNISHKINRLAFGEYFPGVVNPLDSVQWKQETPSATYQYFI  
KVVPTVYNSVSGYTIQSNQFSVTEHVRTAEVGR LQSLPAVFFFYDLSPIKVTFTTEEHVSFLHFLT NVCAIV  
GGVFTVSGILDSFIYHGQKVIKKMEIGKFS

**NCBI Reference Sequence: XP\_004137169.1**

>C.sativusERV-A3  
MDAIFNKLRLDAYPKINEDFYRRTFSGG LITLASSFFMLFLFFSEL RMYLHAKTETQLVVDTSRGGELHI  
NFDLSFPAIPCSILSLDAIDISGEQHLDIRHNI IKKRIDLHGTVIEARPDGIGAPKIEKPLQKHGGRL EHN  
ETYCGSCF GAESADDDCCNSCEEVREAYRKKGWAITNQDLIDQCQREDFIQKVKDEEGEGCNI EGSLEVNK  
VAGSFHFVPGKSFYQSSFNFLG LLLALQTS DYNVSHRINRLAFGNHYDGLVNPLDGVHWEYNEQNMVHQYFV  
KVVPTIYKNIRGR TVHSNQYSVTEHFKSVEFGSSQSIPGVFFFYDLSPVKVITYTEEHVPFLHFMTHICAI I  
GGVFSVAGIIDA FIIYHGQRKMKKKVEIGKFG

**NCBI Reference Sequence: XP\_011655240.1**

>C.sativusERV-B  
MGLKQTIKSLDAFPRAEEHLLQKTQTGAFVSVVGLVIMATLFLHEL RYYLSTYTVHQMSVDLKRGETLPIH  
INMTFPSLPCDVLSDVAIDMSGKHEVDLDTNIWKLRLNSHGQIIIGTEYLSDLVEKEHVDHKHDHDHDK EKD  
HPHIHGFDQAAENLVKKVKQALEEAQGC RVYGVLDVQRVAGNFHISVHGLNIFVAQMI FGGSKHVNVSHMI  
HDL SFGPKYPGIHNPLDGTVRILRDTSGTFKYYIKIVPTEYKYISKAVLPTNQFSVTEYFSPMTSDRSWP  
AVYFLYDLSPI TVTIKEERSFLHFITRLCAVLGGTFAVTGMLDRW MFRFLEALTKPKRTR

**NCBI Reference Sequence: XP\_004151953.1**

>C.sativusPDI-C  
MISSTKLKSVDFYRKIPRDLTEATLSGAGLSIVAALSMVFLFGMELSNYLSVSTSTSVIVDNSTDGDFLRM  
DFNISFPALSCFEAAVDVNDVLTGNRLNITKTIRKFSIDSNLRSTGSEFHSGLSNLIKHGDEVDEEANE G  
SAVLNTRNFDRYANQHPILVVNFYAPWCYWSNRLKPSWEKA AKTIRERYDPELDGRILMAKVDCTEEGDL C  
RKHHIQGYPSIRIFRKGSDVRDDHGHHDHESYYGDRD TDSL VKTMEDLIAPLPAGSQKLALEDKSNNETGN  
VKRPAPSAGGCRIEGYVRVKVPGSLVIAARSESHSFDASQMNMSHII SHLSFGRKISPKAFSDAKQLIPY  
IGISHDRLNGRSFINQRDLGANVTIEHYLQIVKTEVLT RRS GKLL EY EYTAHSSVSQSLYIPVVKFHFV L  
SPMQVVITENQKSF SHFITNVCAIIGGVFTVAGILDALLHNTIRLMKKVELGKNF

**NCBI Reference Sequence: XP\_006403044.1**

>E.salsugineumERV-A1  
MAGILNKLRLDAYPKINEDFY SRTL SGGVITLSSSIVMFLFFSEL RLYLHPTVETETKLVVDTSRGETLRI  
NFDITFPALACSI LSVLDAMDISGELHLDV KHDI IKRRLDSHGNTIEARQD GIGATKIENPLQKHGGRL EHK  
ETYCGSCYGAEEHDDCCNSCEDVREAYRKKGWGVTNPDLIDQCKREGFLQRVKDEEGEGCNIYGFLEVNK  
VAGNFHFAPGKSFHQAGVHVHDL LAFHKDSFNISHKINRLTFGDYFPGVVNPLDRVQWGQDTPNAMYQYFI  
KVVPTVYTDISGHSIHSNQFSVTEHVKSSEAGQLQSLPGVFFFYDLSPIKVTFTTEEHSFLHFLT NVCAIV  
GGVFTVSGIIDA FIIYHGQKAIKKMEIGKFS

**NCBI Reference Sequence: XP\_006416221.1**

>E.salsugineumERV-A2  
MVGVMNRLRLDAYPKINEDFYRRTLSGGVITLVSSIVMLI LFFSELQLYLHPVTETQLRVVDTSRGEKLRI  
NFDVTFPALQCSII SIDTMDISGERHLDVRHDI IKRRLDSHGNTIEAKQDGI GHTKIEKPLQKHGGRL EHN  
ETYCGSCF GAEMTDEACCNSCEEVREAYRKKGWALSDPESIDQCKREGFVQKVKDEEGEGC NVHGFLEVNK  
VAGNFHFVPGQSFHHSFGFQFHD LIMFHQGNYNISHKVNRLAFGDFFPGVVNPLDGVQWNQEKQNGVYQYFI  
KVVPSVYTD AHENTIQSNQFSVTEHFQNAEAGRMQSP PGVFFFYDLSPIKVI FEEQHVEFLHFLT NVCAIV  
GGVFTVSGIVDSFIYHGQRAIKKKMEIGKFN

**NCBI Reference Sequence: XP\_006390025.1**

>E.salsugineumERV-A3  
MPGVMNRLRLDAYPKINDDFY SRSLSGGLITLVSSIFMLI LFFSEL RLYLHPVTESQLRVVDTSRGEKLRI  
NFDVTFPALACSI IISLDSMDISGEQHL DVRHDI AKRRLDSSGNVIETRQDGI GHTKIENPLQRHGGRL EHN  
ETYCGSCYGAEEATDEECCNSCEEVGEAYRKKGWAMSDPEIIDQCKREGFVQRVKDEEGEGCNIYGFLEVNK

VAGSFHFVPGKTFRHS GFHLQDLLAFQGDYNI SHKVNRLTFGDYFPGVVNPLDSVQWTQETLNGMYQYFI  
KVVPT EYTDVKEHIIQSNQFSVTEHF EKTEAGHTQSLPGVFFFYDLSPIKVI FTEQHVEFLHFLT NVCAIV  
GGIFTVSGIIDSFIYHGQRAIKKKMEIGKFG

**NCBI Reference Sequence: XP\_006406186.1**

>E.salsugineumERV-B

MGVKQALKSIDAFPRAEDHLLQKTQSGAVVSIVGLIIMATLFLHELSSYYLNTLTVHQMSVDLKRGETLPIH  
VNMTF PSLPCDVLSDAIDMSGKHEVDLDTNIWKLRLNSHGHIIGTEYISDLVEKEHDHSTHKHEHKNETE  
ALNVLGFDQAAETMIKKVKQALADGEGCRVYGVLDVQRVAGNFHVS VHGLNIYVAQMI FGSSKNVNVSHMI  
HDLSFGPKYPGIHNPLDDTNRILRDTSGTFKYYIKVVPTEYRYLSKDVLSTNQYSVTEYYTPMNEFDRTWP  
AVYFLYDLSPI TVTIKEERSFLHLITRLCAVLGGTFALTGMLDRW MFRFIESFTKKPSTRS IHK

**NCBI Reference Sequence: XP\_006406369.1**

>E.salsugineumPDI-C1

MVSSTKIKSVDFYRKIPRDLTEASLSGAGLSIVAALVMMLLFGMELSSYLEVSTTTAVVVDNSADGDFLRI  
TFNISFPALSCEFASVDVSDVLGTNRLNITKTVRKFPI DPHLRRTTGAEFHSGLALHDINHGEESKEEFPDG  
AIPLTSGSFESYSHHFPILIVNFYAPWCYWSNRLKPSWEKAANI IKQRYDPETDGRVLLGNVDCTEEAALC  
RRNHIQGYPSIRIFRKGSDLRDHDHGHEHESYYGDRDTSIVKMVDGLVAPIHPETHKLALDGISNDTAKN  
LKKAPVTGGCRVEGYVRVKVPGNLVISAHSGAHSFDSTQMNMSHVVTHLSFGRMISPRLLTDMRLLPYL  
GQSHGRLDEKAFINQHEFGANVTIEHYLQIVKTEVITRKSQGEHSLIEEYETAHSSVAQTYYPVAKFHF  
ELSPMQILITENPKSFSHFITNLCAIIGGVFTVAGILDSIFHNTIRLVKKVELGKNI

**NCBI Reference Sequence: XP\_006413109.1**

>E.salsugineumPDI-C2

MVSTSKIKSVDFYRKIPRDLTEATLSGAGLSIVAALSMLFLFGMELNNYLAVSTTTSSIIIVDRSSDGDFLRM  
DFNISFPALSCEFASVDVSDVLGTNRLNVTKTIRKFSIDSNLRPTGTEFHSGEVLSLINHGDEAGEELVED  
SVSLTGRNFDTLHLHQPPI SVVNFYAPWCYWCNLLKPSWEKAAKQIKERYDPEMDGRVILAKVDCTVESDLC  
RRNHIQGYPSIRIFRKGSDLRDDNAHHDHESYYGDRDTESLVKMVI GLVEPIHLEPQRLALEDKSDNASKI  
LKKAPSTGGCRIEGYMRVKKVPGNLMVSARS GSHSFDSSQMNMSHVVNHL SFGRRI LPQTFADLKR LSPYL  
GRSHDRLDGRPFINQRD LGPNVTIEHYLQIVKTEVVKSNGQALIEEYETAHSSVAQSYYPVAKFHFELS  
PMQVLITETSKSFSHFITNVCAIIGGVFTVAGILDSILHQ TMTLMKKIELGKNF

**NCBI Reference Sequence: XP\_006393093.1**

>E.salsugineumPDI-C3

MVSTTKIKSVDFYRKIPRDLTEASLSGAGLSIVAALAMVFLFGMELSNYLAVSTNTSVIVDKSSDGDFLRI  
DFNVSF PSLSCEFASVDVSDVLGTSRLNLTKTIRKVPID AHLRATGAEFHSTTGLDLINHGDEDHENNSY  
AAIPLTGATFDKFSHHFPILVVNFYAPWCYWSNRLKPSWEKAAEITRQKYDPEDDGRVLLGSVDCTEEPTL  
CKRNHIQGYPSIRIFRKGSDLRDHDHGHEHESYYGDRDTE SLLKMVEELLKPIKEDHKLPLDGISVNTAS  
SIKKAPVSGGRIEGYVRAKKIPGEVVISAHSGAHSFDASQMNMSHFVTHLSFGKLI SERLLTDMKRLLPY  
LGQSHDR LNKWFLNQGQFAANVTIEHYLQIVKTEVVSRRFGQEHSLIEEYETAHSNVAHSYYPVAKFH  
FELSPMQVLISENPKSFSHFITNVCAIIGGVFTVAGILDSIFQNTIRLVKKVELGKNI

**NCBI Reference Sequence: XP\_003544786.1**

>G.maxERV-A1

MDSIMSKLRNLDAYPKINEDFY SRTLSSGGVITLASSILMLLLFFSELRLYLHAVTETKLVVDTSRAETLRI  
NFDVTFPALPC SILSLDAMDISGEQHL DVKHDI IKKRLDSHG NVIETRQEGIGAPKIEKPLQRHGGRLEHN  
ETYCGSCYGAEE SDDCCNSCEDVREAYRKKGWALSNPDLIDQCKREGFLQRIKDEEGEGCNVYGFLEVNK  
VAGNFHFAPGKSFQQSGVHVHDL LAFQKDSFNL SHHINRLAFGEYFPGVVNPLDNVHWTQETPSGMYQYFI  
KVVPTVYTDVSGHTIQSNQFSVTEHFRTGDVGR LQSLPGVFFFYDLSPIKVTFTENVSFLHFLT NVCAIV  
GGIFTVSGILDSFIYHGQRAIKKKMELGKFN

**NCBI Reference Sequence: XP\_003542443.1**

>G.maxERV-A2

MESIISKLRNLDAYPKINEDFY SRTLSSGGVITLASSILMLLLFYSELRLYLHAVTETKLVVDTSRAETLRI  
NFDVTFPALPC SILSLDAMDISGEQRL DVKHDI IKKRLDSRG NVIETRQEGIGAPKIEKPLQRHGGRLEHN  
ETYCGSCY GSEVSDDCCNSCEDVREAYRKKGWALSNPDLIDQCKREGFLQRIKDEEGEGCNVYGFLEVNK  
VAGNFHFAPGKSFQQSGVHVHDL LAFQKDSFNL SHHINRLTFGEYFPGVVNPLDNVHWTQETPSGMYQYFI

KVVPTVYTDVSGHTIQSNQFSVTEHFRTGDMGRQLQSLPGVFFFYDLSPIKVTFTTEENVSFHLHFLTNVCAIV  
GGIFTVSGILDSEFIYHGQRAIKKKMELGKFN

**NCBI Reference Sequence: XP\_003524744.1**

>G.maxERV-A3

-----MDKVFNKLRNLDAYPKVNEDFYNR  
TLAGGVVTVVSAAVMLFLFFSELSLYLYTVTESKLLVDTSRGDTLHINFDVTFPAVRCSILSLDAMDISGE  
QHLDIRHNIVKKRIDANGNVIEERKDGIGAPKIERPLQKHGGRLGHDEKCYGSCFGAEESDEHCCNSCEEV  
REAYRKKGWAMTNMDLIDQCQREGYVQRVKDEEGEGCNLQGSLEVNVKAGNFHFATGKSFLQSAIFLADLL  
ALQDNHYNISHRINKLSFGHHFPGLVNPDLGVKVVQGPAGHMYQYFIKVVPTIYTDIRGRVIHSNQYSVTE  
HFKSSELGVAVPGVFFFYDISPIKVNFKEEHIPFLHFLTNICAIIGGVFTVAGIIDSSIIYQGORTIKRKM  
LGKFT

**Phytozome Glycine max Wm82.a2.v1 Proteome ID: Glyma.08G073600.1**

>G.maxERV-A4

MDKVFNKLRNLDAYPKVNEDFYNRTLAGGVVTVVSAAVMLFLFFSELSLYLYTVTESKLLVDTSRGDTLHI  
NFDVTFPAVRCSILSLDAMDISGEQHLDIRHNIVKKRIDANGNVIEERKDGIGAPKIERPLQKHGGRLGH  
EKYCGSCFGAEESDEHCCNSCEEVREAYRKKGWAMTNMDLIDQCQREGYVQRVKDEEGEGCNLQGSLEVNVK  
VAGNFHFATGKSFLQSAIFLADV LALQDNHYNISHRINKLSFGHHFPGLVNPDLGVRVWVQGPHTHMYQYFI  
KVVPTIYTDIRGRVIHSNQYSVTEHFKSSELGVAVPGVFFFYDISPIKVNFKEEHTPFLHFLTNICAIIGG  
VFTVAGIIDSSIIYQGORTIKRKMELGKFT

**NCBI Reference Sequence: XP\_003542168.1**

>G.maxERV-B1

MGMKQVIKNLDAFPRAEDHLLQKTQSGALVSVIGLIIMATLFFVHELGYLLTTYTVHKMSVDLKRGETLPIH  
INMTFPSLPDVLSDVAIDMSGKHEVDLDTNIWKLRLNSYGHIIIGTEYISDLVEKEHTNQEHDDNKDHDH  
HEHSEQKIHLQNLDESTENIIKKVKEALKNGEGCRVYGVLDVQRVAGNFHISVHGLNIYVAQMIFDGAKNV  
NVSHFIHDLDFGPKYPGLHNPLDDTTRILHDTSGTFKYYIKVVPTIYTDIRGRVIHSNQYSVTEHFKS  
FDRTWPAVYFLYDLSPIITVTIKEERSFLHFITRLCAVLGGTFAVTGMLDRWMYRLLLEALTKSKSKR

**NCBI Reference Sequence: XP\_006605681.1**

>G.maxERV-B2

MGMKQVIKNLDAFPRAEDHLLQKTQSGALVSVIGLIIMATLFFVHELGYLLTTYTVHQMSVDLKRGETLPIH  
INMTFPSLPDVLSDVAIDMSGKHEVDLDTNIWKLRLNSYGHIIIGTEYISDLVEKEHTHHKHDDNKDNEHS  
EQKIHLQNLDESTENIIKKVKEALKNGEGCRVYGVLDVQRVAGNFHISVHGLNIYVAQMIFDGAKNVNVSH  
FIHDLDFGPKYPGLHNPLDDTTRILHDTSGTFKYYIKVVPTIYTDIRGRVIHSNQYSVTEHFKS  
WPAVYFLYDLSPIITVTIKEERSFLHFITRLCAVLGGTFAVTGMLDRWMYRLLLEALTKSKSKR

**NCBI Reference Sequence: XP\_003543298.1**

>G.maxPDI-C1

MISSKIKSVDFYRKIPRDLTEASLSGAGLSIVAALAMIFLFGMELNSYLSVTTSTQVIVDKSSDGDYLR  
DFNISFPALSCEFAAVDVSVDLGTNRLNLTKTVRKFSIDSNLRPTGAEFHSEPAANSIKHDNEVNEESVEG  
SVVLKTNQNFQDYAHQFPITVVNFYAPWCYWSQRLKPSWEKAAKIIKERYDPEMDGRIILGRVDCTEDGDL  
RSHHIQGYPSIRIFRKGSDVRSNHGHHDHESYGGDRDTSLSVKTMENLVASLPSESQKLPLEDKSDVAKNT  
ERPAPSTGGCRIDGYVRVKKVPGNLIISARNSAHSFDASQMNMSHVINHLSFGRKVS PRVMSDVKRLIPYV  
GSSHDRLNGRSFINTHDLGANVTMEHYLQIVKTEVITRKDYKLVVEEYETAHSSVAQSLHIPVAKFHLELS  
PMQVLITENQKSFSHFITNVCAIIGGIFTVAGIMDAIHLNTIRLMKKVELGKNF

**NCBI Reference Sequence: XP\_003540413.1**

>G.maxPDI-C2

MISSKIKSVDFYRKIPRDLTEASLSGAGLSIVAALAMIFLFGMELNSYLSVSTSTQVIVDKSSDGDYLR  
DFNISFPALSCEFAAVDVSVDLGTNRLNLTKTVRKFSIDSNLRPTGAEFHSEPAANSIKHDNEVNEESVEG  
SVVLTTQNFQDYAHQFLITVVNFYAPWCYWSQRLKPSWEKTAKIIKERYDPEMDGRIILGRVDCTEDGDL  
RSHHIQGYPSIRIFRKGSDVRSNHGHHDHESYGGDRDTSLSVKTMENLVASLPSESQKLPLEDKSNVATNT  
KRPAPSTGGCRIDGYVRVKKVPGNLIISARNSAHSFDASQMNMSHVINHLSFGRKVS LRVMSDVKRLIPYV  
GSSHDRLNGRSFINTHDLGANVTIEHYLQIVKTEVITRKEYKLVVEEYETAHSSVAQSLHIPVAKFHLELS  
PMQVLITENQKSFSHFITNVCAIIGGIFTVAGIMDAIFHNTIRLMKKVELGKNF



**Phytozome *Glycine max* Wm82.a2.v1 Proteome ID: Glyma.12G134500.1**

>G.maxPDI-C3

MISATKLKSVDFYRKIPRDLTEASLSGAGLSIVAALVMMFLFGMELSSYMSVSTSTSVIVDKSSDGDYLRIDFNISFPALSCEFASVDVSDVLGTNRLNITKTVRKFSIDSNLRPTGAEFHSGTVANAVKHDDEVDEESVEGSFSLTTHNFDKYVHQFPVTIVNFYAPWCSWCQRLKPSWEKTAKIMKERYDPEMDGRIILAKVDCTQEGDLCRRNHIQGYPSIRIFRKGSDLRSEHGHEHESESYYGDRDTESLVKFMEDLVTSLPTESQKLALEDKSNADNAKRPAPSAGGCRVEGYVRVKVPGNLIISARSDAHSFDASQMNMSHVINNLSFGKKVTPRAMSDVKLLIPYIGSSHDRLNGRSFINTRDLGANVTIEHYIQIVKTEVVTRKGYKLIIEEYEYTAHSSVAHSLDIPVAKFHLELSPMQVLITENQRSFSHFITNVCAIIGGVFTVAGILDSILHNTIRMVKKIELGKNF

**NCBI Reference Sequence: XP\_003527321.1**

>G.maxPDI-C4

MISATKLKSVDFYRKIPRDLTEASLSGAGLSIVAALAMMFLFGMELSSYLSVSTSTSVIVDKSSDGDYLRIDFNISFPALSCEFASVDVSDVLGTNRLNITKTVRKFSIDSNLRPTGAEFHSGTVANAVKHDDEVDEESVEGSFSLTTHNFDKYVHQFPITAVNFYAPWCSWCQRLKPSWEKTAKIMKERYDPEMDGRIILAKVDCTQEGDLCRRNHIQGYPSIRIFRKGTDLRSEHGHEHESESYYGDRDTESLVKFMEDLVTSLPTESQKLALEDKSNASDNARKRPAPSAGGCRVEGYVRVKVPGNLIISARSDAHSFDASQMNMSHFINNLSFGKKVTPRAMSDVKLLIPYIGSSHDRLNGRSFTNTHDLGANVTIEHYIQIVKTEVVTRNGYKLIIEEYEYTAHSSVAHSVDIPAAKFHLELSPMQVLITENQRSFSHFITNVCAIIGGVFTVAGILDSILHNTIRMMKKVELGKNF

***Klebsormidium flaccidum* proteome V1.0: kf100198\_0280**

>K.flaccidumERV-A

MGDVLNLYLKKLDAYPKINEDFYSRTLSSGLITLVSSIFIVLLFFTELGLFLTTKTVNELSVDTSRGEQLQINFDVITYPHLACISILSDAMDVSQHLQDLDVHNIKRRLSPEGKPIDVGTKEIGGPKVQTGEVVKVESEGGPAYCGSCWGAEEAEDCCNTCEEVREAYRRKGWAFSNAELIEQCSREGFVEKLKEQEGEGCNVYGYLEVNVK VAGNFHFAPGKSFQQAHMHVHDLMPFASQKFNVSHIINKLSFGADYPGVVHPLDNVRRIQEADGGMYQYFIKVVPTIYTDLSGHVISTNQFSVTEHFREQEVASGRSLPGVFFFYDLSPIKVKFTEQRQSFLHFVTNVCAIIVGGVFTVSGIIDAFAVYHGKVIKKKMELGKLN

***Klebsormidium flaccidum* proteome V1.0: kf100263\_0210**

>K.flaccidumERV-B

MAFKIAALSRI DAYPRAESHLTQRTISGAAISIMGISLMVLLFVNELQFYMTPYTENEMTVDVKGREKLPIHINITFPSLPCSVLSLDALDMSGKHEVDISNNIWKARLDSQGRPGIWQQVDKLDHADDTAHNEAHAEDTTEHDFALANARRAAQADANKQVEDIKAALANQEGCRVYGHLDVERVAGNFHISVHGQSYVVLGQVFASASTVN VSHHIESVSFGPPIPGTTNPLDGYTRILKTEQESGTFKYFIKVVPTIEYFPLKGDHVTNQYSVTEYFMPSSMQPGGLPAVYFLYDLSPIAVKVTERRRNFHFLTRICAVLGGTFAVTGMIDKWTYKTVQLFTSQRSSGSQ

***Klebsormidium flaccidum* proteome V1.0: kf100062\_0160**

>K.flaccidumPDI-C

MNRVLGRLRSVDFYRRI PRDLTEATLAGGTLSSVVASIAMVLLFGMELQAYLTTSTATTVIIDRSRDGDVMMRINFNFSFPALSCEFASVDVSDVLGTHRINLSKTVRKFPIDHAGRITGPEFHHAHTVREPAHDDPAPDPIDEGAAEMEAKERQLAEGGQPPEGDPPIKDPGGALPLSEATFDTITKESFPIMVNFAPWCPWSQRLEPVWEASAKAMLKKYDVDVNPQILLAKVDCTVEVALCRKHHVQGFPSIRIFRSGQDVRAAQGHHDHESYYGDRTEAAITQFADDLATGLQQRAHALPGATAQQVVPWMMGKDGRALRVVAKAPQSSGCQIEGFVLVKKVPGNLQVA AVSAGHSFDPATMNMSSHVNSFSFGRKPTLKQYHEIDRIWSHHPSAGEDRLTGRYFHSHSDNLTHEHYLQV VLTSVEPLKLP AHQYVQSYDYTAHSNVFNESA AVPVAKFHYELSPMQVVITENSRSFSHFITNVCAIIGGVFTVAGIVDGILFQAASA IKKVQLGKQF

**NCBI Reference Sequence: XP\_003615024.1**

>M.truncatulaERV-A1

MDSIMNKLRLNDAYPKINEDFYSRTLSSGLITIVSSILMLLLFFSELRLYLHAATETKLVVDTSRGETLRI NFDVTFPALACISIVSLDAMDISGEQHLDRHDIKKRIDSHGNVETRQDGI GSPNIEKPLQRHGGRL EHN ETYCGSCYGAEEASDEECCNSCEEVREAYRRKKGWALSSPDSIDQCKREGFLERIKEEEGEGCNVYGFLEVNVK VAGNFHFAPGKSFQQSGVHVHDL LAFQKESFNLSHHINRIAFGDYFPGVVNPLDRVHWTQETPSGMYQYFIKVVPTMYT DVSNGTIQSNQFSVTEHFRTADVGR LQSLPGVFFFYDLSPIKVTFTTEHVSFLHFLT NVCAIIVGGIFTVSGILDSFIYHGQKAIKKKMELGKFS

**GenBank: ACJ84247.1**

>M.truncatulaERV-A2

MDKVFVFNKLRNLDAYPKVNEDFYNRRTLAGGVVTVVSAAVMLFLFISELRRLYLTVTESKLLVDTSRGETLNI  
NFDVTFPAVRCSILSLDMDISGERHHDILHNIMKQRIDANGKVIIEARKEGIGAPKIERPLQKHGGRLEHD  
EKYCGSCFGAEESDDHCCNCEEVREAYRKKGWALTNIDLIDQCQREGFVQKVKDEEGEGCNIHGSLEVNK  
VAGNFHFATGQSFLQSAIFLTDLLALQDNHYNISHQINKLSFGHHYPGLVNPDLGKQVQGNHGMCCQYFI  
KVVPTVYTDIRGRVIHSNQYSVTEHFKSSELGAAVPGVFFFYDISPIKVNFKEEHIPFLHFLTNICAIIGG  
IFTIAGIVDSSIYYGQKTIKKKMEIGKYR

**GenBank: KEH35189.1**

>M.truncatulaERV-B

MGMKQVIKLNDAFPRTEHDLLQKTQSGALVSIIGLIIMATLFLHELGYLLTTYTVHQMSVDLKRGETLPIH  
INMTFPSLPCDVLSDAIDMSGKHEVDLDTNIWKLRLNSYGQIIIGTEYISDLVEKGEHDHDHGHGTHKHDDS  
KDHHEHSEQKVHLQTFDEATENTIKKVKEALKNGEGCRVYGVLDVQRVAGNFHISVHGLNIYVAQMIFDAG  
KNVNVSHVIHDLDFGPKYPGIHNPLDETSRILHDASGTFKYIKIVPTEYRYISKEVLPTNQFSVTEYFSP  
ITSQFDRTPAVYFLYDLSPITVTIKEERSFLHFITRLCAVLGGTFAVTGMLDRWMYRLVEAATKPKNKK

**GenBank: AES66908.2**

>M.truncatulaPDI-C1

MTTASKIKSVDFYRKIPRDLTEASLSGAGLSIVAALAMMFLFGMELNEYLSVHTSTSVIIDKSSDGEFLRI  
DFNLSFHALSCEFASVDVSDVLGTNRMNLTKTVRKFSIDSNLRPTGSEFYLRPSTNVIKHDDKVDDESLEG  
AFVFTSNFDFKYSHQFPIITAVNFYAPWCYWSQRLRPSWEKTAKIIRERYDPEMDGRILLGKVDCTKEADLC  
RRHHIQGYPSIRIFRKGSDVRSDHGHEHESYYGDRDTSVLKTMENILASFPSEYYKLALEDKLNVTEDS  
KRPAPSSGGCRIEGYVRVKVPGNLIISARSDAHSFDASQMNMSHAVHLSFGKLSPKLMSDVQRLIPYV  
GNSHDLRLDGLSFINSHDFGANVTLQIVKTEVITRQGYQLVEEYETAHSSLAHSLHVPVARFHLQLS  
PMQVLITEDHKSFSHFITNVCAIVGGVFTVAGITESILHNTIRLMRKVELGKNF

**NCBI Reference Sequence: XP\_003607653.1**

>M.truncatulaPDI-C2

MLSASKLKSVDYRKIPRDLTEASLSGAGLSILAALAMMFLFGMELSNYFAVTTSTSVIVDKSSDGDGFLRI  
DFNFSFPALSCEFASVDVSDVLGTNRNLNITKTVRKFSIDSKLRPTGSEFHSGTIANAVKHDDEVDTDFVEG  
SLPLTSQHFDKYVQLFPIITVNFYAPWCWCQRLKPSWEKAAMKIMRERYDPEMDGRILLAKVDCTQEGDLC  
RRHHIQGYPSIRIFRKGSDVRSDHGHEHESYYGDRDTESLVKTMETLVASLPTGSQHLALEDKSNGTGRP  
APSTGGCRVEGYVRVKVPGSLVVSARSDAHSFDASQMNMSHVINHLSFGKVTTPRAMIDVKHWIPYLGIN  
HDRLNRSFINTRDLEGNVTIEHYIQVVKTEVITRKGKYLIEEYETAHSSVAHSVNIIPVARFHLELSPMQ  
VLITENQKFSFSHFITNVCAIIGGVFTVAGILDSILHNTIKAMKKIEIGKNF

**GenBank: CAE02574.2**

>O.sativaERV-A1

MEGLLSKLRSLDAYPKVNEDFYSRTLSSGIIITLASSVVMLLLFLVSELRLYLHVAVTETTLRVDTSRGETLRI  
NFDVTFPALQCSIIISLDAMDISGQEHLDVVKHDFIKQRIDVHGNVIATKQDAVGGMKVEQPLQRHGGRLHNE  
ETKCGSCYGAEESEDEQCCNSCEDVREAYRKKGWVSNPDLIDQCKREGFLQSIKDEEGEGCNIYGFLEVNK  
VAGNFHFAPGKSFQKANVHVHDLPLPFQKDSFNVSHKINKLSFGQRFPVGNPLDGAQWQHSYSGMYQYFI  
KVVPTVYTDINEHIILSNQFSVTEHFRSSESGRIQAVPGVFFFYDLSPIKVTFTQHVSVFLHFLTNVCAIV  
GGVFTVSGIIDSFVYHGQRAIKKKMEIGKFN

**GenBank: ABF95668.1**

>O.sativaERV-A2

MDLWNLKLRSLDAYPKVNEDFYSRTLSSGLLITIASLAILLLLFLSEIRLYLYSATDSKLTVDTSRGERLHIN  
FDVTFPALPCSLVAVDVTMDVSGEQHYDIRHDIKKRIDNLGNVIESRKDGVGAPKIERPLQKHGGRLDHNE  
VYCGSCYGESESDQCCNSCEDVREAYRKKGWALTNIEEIDQCKREGFVQRLKDEQEGGCSIHGFVNVNKV  
AGNFHFAPGKSLDQSFNFLQDLLNFQENYNISHKINKLSFGVEFPVGNPLDGVVWVQEHNTGLTGMYYQY  
FVKVVPTIYTDIRGRKINSNQFSVTEHFREAIQYPRPPPGVYFFYEFSPKVDFTTEENTSLHFLTNICAI  
VGGIFTVAGIIDSFVYHGHRRAIKKKMEIGKLG

**NCBI Reference Sequence: NP\_001055898.1**

>O.sativaERV-A3

MEGFLQKLKGLDAYPKVNEDEFYKRTLSSGGVTVVASVVMLLLFFVSETRSYFYSAETETKLVVDTSRGERLRV  
NFDVTFPSPVCTLLSVDTMDISGEQHHDIRHDIEKRRLDAHGNVIEARKEGIGGAKIESPLQKHGGRLSKG  
EEYCGTCYGAEESEDEQCCNSCEEVREAYKKGWALTNPDLDQCTREDFVERVKTQQGEGCNVHGFLDVSK  
VAGNLHFAPGKGFYESNINPELSALEHGFNITHKINKLSFGTEFPGVNVPLDGAQWTQPASDGTYYQYFIK  
VVPTIYTDLGRKIHNSNQFSVTEHFRDGNIRPKPQPGVFFFYDFSPIKVIIFTEENSLLHLYLTNLCAIVGG  
VFTVSGIIDSFIYHGQKALKKKMELGKYR

**NCBI Reference Sequence: NP\_001051473.1**

>O.sativaERV-B

MGRIPSLKNFNAPHAEDHLLKKTYSGAIVTIFGLIIMVTLFAHELKFYLTYYTVHQMSVDLKRGETLPIH  
INMSFPPLPCEVLSVDAIDMSGKHEVDLHTNIWKLRLDKYGHIIIGTEYLNLDLVEKEHGHGTHNHDHDEHEDE  
QKKQEHTFNEDAEMKSVKQAMENGEGRVYGVLDVQVRVAGNFHISVHGLNIFVAEKIFDGSSHVNVSHI  
IHDLSFGPKYPGIHNPLDETRILHDTSGTFKYYIKIVPTEYRYLSKQVLPTNQFSVTEYFVPKRATDRSA  
WPAVYFLYDLSPITVTIKEERNFLHFLTRLCAVLGGTFAMTGMLDRWMYRLIESVTKSKTRSVLR

**NCBI Reference Sequence: NP\_001059821.1**

>O.sativaPDI-C

MISSSKLKSVDFYRKIPRDLTEASLSGAGLSIVAALAMVFLFGMELSNYLAVNTSTSVIVDRSSDGEFLRI  
DFNLSFPALSCEFASVDVSDVLGTNRLNITKTVRKYSIDRNLVPTGSEFHPGPIPTVSKHGDDVEENHDDG  
SVPLSSRNFDYSYHQYPVLVNFYAPWCYWSNRLKPSWEKTAKIMRERYDPEMDGRIILAKVDCTEEIDLC  
RRHHIQGYPSIRIFRKGSDLKENQGHHDHESYYGDRDTESLVAAMETYVANIPKDAHVLALEDKSNKTVDP  
AKRPAPLTSGCRIEGFVRVKKVPGSVVISARSGSHSFDPSQINVSHYVTQFSFGKRLSAKMFNELKRLTPY  
VGGHHDRLAGQSYIVKHGDVNANVTIEHYLQIVKTELVTLRSSKELKLVVEEYETAHSSLVHSFYVPVVKF  
HFEPSPMQVLVTELPKSFSHFITNVCAIIGGVFTVAGILDSIFHNTLRLVKKVELGKNI

**NCBI Reference Sequence: XP\_001759631.1**

>P.patensERV-A1

**MALQ**MIQKLKSLDAYPKINEDFYRSTLSGGIITIIISATFMVLLFFSELKLYLAAQVANDLVVDTERGGTIQ  
INLDVTFPALACSVVSLDAMDISGEAHLVDVKNHIFKKRLDVNGKVIIEPARQESINQPKLDKPLQKHGGRL  
HNETYCGSCFGAETEEDHCCNCEEVREAYRKKGWALNPNLDLDQCKREGFLQKIKDEDGEGCNVYGTLEA  
NKVAGNFHFAPGKSFQQANMHVHDLMAFGKDSFNVSHKINEISFGVRYPGAVNPLDKLERIQTTTHGMYQY  
FIKVVPTVYTDTRGRKISTNQFAVTDHFKGVGPGEDHALPGVFFFYDLSPKVKFTEKRMSFFHFLTNVCA  
IVGGVFSVSGIIDAFAVYHGQKQIKKRLGKDT

**NCBI Reference Sequence: XP\_001764962.1**

>P.patensERV-A2

MAVFNKQQLDAYPKISEDYRSTLSGGVITLVSTVFMFVLFVTEISLYLSAQTONQLVVDTSRGETLQIN  
LDITFPALACSMVSLDAMDISGEQHLNVRHNIFFKRLDVHGKVVNAPKPDAINAPKVQKPLQKHGGRL  
ETTCGSCFGAESSDDECCNCEEVREAYRKKGWALTNADLDQCHREGFIERVKEEAGEGECNIYKLEVNK  
VAGNFHFAPGKSFQQSAMHLLDLMGFITDSFVNSHTINELSFGAHFPGAVNPLDKVTNIQKDLNGMYQYFI  
KVVPTVYTDIKGRKISTNQFSVTEHYTAGDHGPRFVPGVFFFYDLSPKVKFSEERPSFLHFLTNVCAIVG  
GVYSIAGIIDSFVYHGHRAIKKKMELGKLS

**NCBI Reference Sequence: XP\_001754958.1**

>P.patensERV-A3

MAIFNKLKQLDAHAKPKISEDYRSTLSGGVITLVSSIFMFLLFVTEFRIYLSAQTONQLVVDTSRGETLQIN  
LDITFPALACSVVSLDAMDISGELHLDVHRHNIYKRLDVHGKAVDAPKPDAINAPKVQKPLQKHGGRL  
ETTCGSCFGAESSDDQCCNSCEEVREAYRKKGWALTNADLDQCHREGFIERIKEEAGEGECNIYKLEVNK  
VAGNFQIAPGKSFQQSAMHLLDLMGFVTDVNSHTINELSFQAYFPGAVNPLDKVTSIQKDQNGMFQYFI  
KVVPTVYTDIKGRKISTNQFSVMEHYTAGDHGPRVPIPGVFFFYDLTPKVKFTEERPSFLHFLTNVCAIIG  
GIYTIAGIVDSFIYHGHRAIKKKMELGKLS

**NCBI Reference Sequence: XP\_001762360.1**

>P.patensERV-A4

MSFFNKLKHLDAYPKISEDYRSTLSGGVITLVSSVFMFTLLFITEFRIYLSAQTONQLVVDTSRGETLQIN  
LDITFSALACSVVSLDAMDISGEQHLNVRHNIFFKRLDVHGKAIDAPKPDAINAPKVQRPLQKHGGRL  
LEHN

ETYCGSCFGAASSDDECCNSCEEVREAYRKKGWALINIDIIDQCHREGFIERVKEEAGEGECNIYGKLEVNK  
VAGNFHFIAPGKLFQQSAMHLLDLLGIRSDSFNVSHIVNELSFGAHFPGRVNPLDKITSIQKDQNGMYQYFI  
KVVPTVYTDIRGSEIATNQFSVTEHYTAGDHGPRVVPGVFFFDLSPIKVKFTEKRPSFLHFLT TVCAIVG  
GVYTVASIIDSFIYHGHRVAVKKKMEIGKFS

**NCBI Reference Sequence: XP\_001754824.1**

>P.patensERV-B  
MRKEKWQVIKNLDAFPRAEEHLLQKTSSGAAVSAIGLFIMGVLFHFLRFYLETVTVHEMSVDVKRGEKLP  
IHINMTFPALPCEVLSLDAIDMSGKHEVDLDTNIWKLRIHRDGYVLGSEFVNDLVEGEHRKEEPKADKKDE  
HKDGDHRKKDPQKVINVEVKKAIIDDGEGCQIFGVLDVERVAGNFHISMHGLSLYVASKIFEAGYEVNVSHVI  
HDLSFGPTYPGHHNPLDGSERILHDTSGTFKYFLKIVPTEYHYLHGEVMPNTNQFSVTEYYQRTKPSDRSYP  
AVYFVYDLSPIVVTIREHRRNFGHFITRLCAVLGGTFAVTGMLDRWMSRIIDFVMSTSKQGL

**Phytozome *Physcomitrella patens* v3.0 proteome: Phpat.014G071500.2**

>P.patensPDI-C  
MVSTSKLKSIDFYRKIPRDLTEASLSGAGLSIIAALTMVFLFGMELSAYLSTTTSTSVVVDERSRDGEYLRI  
DFNLSFPALSCEFASVDVSDVLGTHRFNLTKTVRKYPIDPLLQRIGQEFHAGSVPNIKSHGDEEDVGEDMFE  
HLGEGAVELNKNTFDVYAQQFSVLVVNFYAPWCPWSNKLKASWEKAAKI IADKYNPEMDGRILLAKVDCTV  
NVELCRSHHIQGYPSIRIFRKGHDVRDEHGRHDHESYGERDTESLVAFMVVELVPPATVDGKFLQLEDKSSI  
TVNATIKRPAPKAGGCRVEGFVRVKKVPGELMISAHSGSHSFDATSMNMTHYVGGFFSFRKTSWRSVHWVN  
EMLPALDSNIDRLTGQVFPSEYENITHDHYLQVVKTEVITLHRKQDLRVLEQYDYTAHSNMIQSTKVPVVK  
FHYELSPMQVLVKENPKSFSHFLTNLCAIIGGVFTVAGIIDSMLHNAMHIMKKVELGKQY

**NCBI Reference Sequence: XP\_007227487.1**

>P.persicaERV-A1  
MENMMSRLRNLDAYPKINEDFYRSRTLSGGVITLASSIVMLLLFLSELRLYLHAVTETKLVVDTSRGETLRI  
NFDVTFPSALPCSI LSLDAMDISGEQHLDVKHDI IKKRLDSHGNVIESRPDGIGAPKIEKPLQRHGGRLHFN  
ETYCGSCYGAEEADEDCNSCEDVREAYRKKGWAI SNPDVIDQCKREGFLQRIKDEEGEGECNIYGFLEVNK  
VAGNFHFAPGKSFQQSNVHVHDL LAFQKDSFNISHTINRLSFGDYFPGVVNPLDGVHWAQATPSGMYQYFI  
KVVPTVYTDVSGHTIQSNQFSVTEHFRGTEVGNLQYLPGVFFFDLSPIKVTFTTEHISFLHFLT NVCAIV  
GGVFTVSGILDSFIYHGQKAIKKKMEIGKFS

**NCBI Reference Sequence: XP\_007200362.1**

>P.persicaERV-A2  
MDSILQKLRNLDAYPKINDFFSRTLSGGIITLASSLILLFFSELRLYLHTVTESKLLVDASRGETLHI  
NFDVTFPAIRCSLLSLDTMDISGEQHFDIRHDIVKKRIDAHGNVIEAKKDGIGAPKIDNPLQRHGGRLHFN  
EKYCGSCFGAEMSDDDCCNSCDEVRDAYRKKGWALTNADMIDQCKREGFIQKIKDEDEGEGECNIEGSLVNK  
VAGNFHFVSGKSFHQSNIHVQDLLAFQTDSYNISHKINRLAFGDYFPGKLNPLDGVQWRQETPNGMYQYFI  
KVVPTLYTNIRGRTIRSNOYSVTEHFKSSELGHSQLLPGVFFFDLSPIKVTLKEEHVPFLHFMTHICAIV  
GGIFTVAGLIDSFVYHGQRAMKKKMEIGKFG

**NCBI Reference Sequence: XP\_007215619.1**

>P.persicaERV-B  
MGVKQALKSLDAFPRAEEHLLQKTQTGAVVSVVGLLIMATL FVHELRYLLTTYTVHQMSVDLKRGETLPIH  
INITFPSP L PCDVLSVDAIDMSGKHEVDLDTNIWKLRLNSYGHII GTEYLSDLVEREHSKHKHDDSKDHEDK  
DQEIHLQGAFDQAAEDLIKRVKHA IANGEGCQVFGVLDVQVRVAGNFHISVHGLNIFVAQMI FEGSKNVNIS  
HIIHDLSFGPKYPGIHNPLDGTERRILHDTSGTFKYI KVVPTTEYRYISKEVLPTNQFSVTEYFSPMKQFDR  
TWPVAVFLYDLSPIVTITKEERRSFLHFITRLCAVLGGT FALTGMLDRWMYRFLEAVTKPNARSVLR

**NCBI Reference Sequence: XP\_007213964.1**

>P.persicaPDI-C  
MISTGKIKSVDFYRKIPRDLTEASLSGAGLSIIAALAMMFLFGMELNSYLAFSTSTSVIVDKSSDGDFLRI  
EFNISFPALSCEFASIDVSDVLG TNRLNITKTKIRKFSIGPDLKPTGSEFHSGPAFHDIKHGDGDEYGGDGS  
VSITARTFEKFTHQHPILVVNFYAPWCYWSNRLKPSWEKAAKI IRERYDPEIDGRILLAKVDCTEEDLCK  
RNHIQGYPSIRIFRKGSDVRDDHGHHDHESYGDRTDLSLVKTMETLVAPI PVEAQKLALEGKSDNGTDNA  
KRPAPLTGGCRIEGYVRVKKVPGNLVISAHSGAHSFDASQMNMSHVISHSFSGRMIAPKVMDSVKRLVPYL

GGSHDRNLNGRSFINHRDLGANVTIEHYLQIVKSEVITGRNHKLIEEYETAHSSSLVQSLQIPVAKFHFELS  
PMQVLITENQKSFSHFITNVCAIIGGVFTVAGIVDSILHNTIRMMRKVELGKNF

**NCBI Reference Sequence: XP\_002306582.1**

>P.trichocarpaERV-A1  
MEGLMSKLRNLDAYPKINEDFYSRTLSSGGVITLASSVVMFLFFSELRLYLHAVTETKLVVDTSRGETLRI  
NFDVTFPALPCSILSLDAMDISGEQHLVDVKHDI IKKRLDFHGNVIEARQDGIGAPKIEKPLQRHGGRLEHN  
ETYCGSCYGAEASDEDCCNSCEDVREAYRKKGWAVTNPDLMDQCKREGFLQKIKDEEGEGCNIYGFLEVNK  
VAGNFHFAPGKSFQQSGVHVHDLALAFQKDSFNITHKINRLTFGEYFPGVVNPLDGVQWTQETPSGMYQYFI  
KVVPTVYTDVSGHTIQSNQFSVTEHFRGTDIGRLQSLPGVFFFYDLSP IKVTFTEEHVSVFLHFLT NVCAIV  
GGVFTVSGILDTFIYHGQKAIKKKMEIGKFS

**NCBI Reference Sequence: XP\_002302286.1**

>P.trichocarpaERV-A2  
MDGLMSKLRNLDAYPKINEDFYSRTLSSGGVITLASSIVMFLFFSELRLYLHAVTETKLVVDTSRGETLRI  
NFDVTFPALPCSILSLDAMDISGEQHLVDVKHDI IKKRLDSHGNVIESRQDGIGAPKIEKPLQRHGGRLEHN  
ETYCDEDCCNSCEEVREAYQKKGWAVTNPDLMDQCKREGFLQRIKDEEGEGCNIYGFLEVNVVAGNFHFAP  
GKSFQQSGVHVHDLALAFQKDSFNTHKINRLAFGEYFPGVVNPLDGVQWTQETPSGMYQYFIKVVPTVYTD  
VSGHTIQSNQFSVTEHFRGADIGRLQSLPGVFFFYDLSP IKVTFTEEHVSVFLHFLT NVCAIVGGVFTVSGI  
LDSFIYHGQKAIKKKMEIGKFS

**Phytozome *Populus trichocarpa* v3.0 Proteome: Potri.001G206100.1**

>P.trichocarpaERV-A3  
MEGIYQKLRNLDAYPKINEDFYSRTLSSGGLITLISSIIIMLFLFFSEFSLYLHAVTETKLLVDTTRGQTLRI  
NFDITFPAIRCSLLSVD AIDISGEQHDIRHDITKKRINAHGDVIEVRQDGIGAPKIDKPLQKHGGRLEHN  
EEYCGSCFGAEMSDHCCNSCDEVREAYRKKGWALTNMDLIDQCIREGFVQMIKDEEGEGCNIINGSLEVNR  
VAGNFHFVPGKSFHQSNFQLLDLDMQKESYNI SHRINRLAFGDYFPGVVNPLDGIQLMHETQNGVQQFFI  
KVVPTIYTDIRGRTVHSNQYSVTEHFTKSELMLRDLSPGVIYDFSP IKVTFKEEHTSFLHFMTSICAI I  
GGIFTIAGIVDSFIYHGRRAIKKKMEIGKFS

**Phytozome *Populus trichocarpa* v3.0 Proteome: Potri.003G023500.1**

>P.trichocarpaERV-A4  
MDRIYQKVRNLDAYPKINEDFYSRTLSSGGLITLISSVLI LFLFFSELSLYLHKVTETKLLVDTSRGQSLRI  
NFDVTFPAIRCSLLSVD AIDISGEQHDIRHDISKRINAHGDVIEVRQEGIGAPKIDRPLQSHGGR LGHN  
EEYCGSCFGGEMSHDDCCNTCEEVREAYRKKGWAMTNMDLIDQCKREGFIQMIKDEEGEGCNIINGSLEVNR  
VAGSFHFAPWKSFHLSNFLIQDLLDLQKDSYNI SHRINRLAFGDYFPGVVNPLAGIQLMHDTPNGVQQFFI  
KVVPTIYTDIRGRTVHSNQYSATEHFKKSELTPLDSLPGVYFFYDFSP IKVIFKEEHISFLHFMTSICAI I  
GGIFTIAGIIDSFIYYGQRAITKKVGIGKFG

**NCBI Reference Sequence: XP\_002307923.1**

>P.trichocarpaERV-B1  
MGMKQAIKKLDAFPRAEEHLLQKTQSGALVSI IGLVTMATLFYHELAYYLT TTYTVHQMSVDLTRGETLPIH  
INITFPSLPDVL SVDAIDMSGKHEVDLDTSIWKLRLNSYGHITGTEYLSDLVEKEHEAHNHDHNDHHDHED  
SHAKQHTHGFDAAETMVKVKQALANGEGCRVYGVLDVQVRVAGNFHISVHGLNIFVAQMI F DGAKHVNVNS  
HIIHDL SFGPKYPGIHNPLDGTTRILHETSGTFKYIKIVPTEYRYISKEVLPTNQFSVTEYFSPMTDFDR  
TWPVAVYFLYDLSPITVTIKEERRSFLHFITRLCAVLGGTFALTGMLDRWMCRLLEALTKPNRPSVLR

**Phytozome *Populus trichocarpa* v3.0 Proteome: Potri.016G022800.3**

>P.trichocarpaERV-B2  
MGVKQAIKSLDAFPRAEEHLLQKTQSGALVSVI GLVIMATLFYHELAYYLT TTYTVHQMSVDLQRGEILPIH  
VNITFPSLPDVL SVDAIDMSGKHEVDLDTNIWKLRLNSHGHITGTEYLSDLVEKEHEAHNHDHDKDHHKD  
SHEEQHTHGFDAAETMIKKVKQALANGEGCRVYGVLDVQVRVAGNFHISVHGLNIFVAQMI F DGAKHVNVNS  
HIIHDL SFGPKYPGIHNPLDGTARILRETSGIFKYIKIVPTEYRYISKDVLPTNQFSVTEYFSPITDFDR  
TWPVAVYFLYDLSPITVTIKEERRSFLHFITRLCAILGGTFALTGMLDRWMYRLLLEALTKPNRSGSGL

**NCBI Reference Sequence: XP\_002317580.1**

>P.trichocarpaPDI-C1

MVSTNKLKSVDFYRKIPRDLTEASLSGAGLSIVAALAMMFLFGMELNNYLTVNTSTTVIVDNSSDGEFLRI  
DFNISFPPLSCEFASVDVSDVLGTNRLNITKTIRKFSIDHDLKPTGSEFHSGPVLHQIKHGDEVDEEGGEG  
SVSLKAHNFDQYSHQYPILVVNFFAPWCYWSNRLKPSWEKAAKIIRERYDPEMDGRILLAKVDCTEEGDLC  
RRNHIQGYPSIRIFRKGSNLREDHGRHDHESYYGDRDTESLVKTMEALVAPIAMESQRQALEHKPENATQH  
VKRPAPSAGGCRIEGYVRVKVPGNLMISALSGAHSFDSKQMNLSHVISHFSFGMKVLPVMSDVKRLLPY  
IGRSHDKLNGRSFINHRDVGANVTIEHYLQVVKTEVVTRSSSERKLIIEEYETAHSSLSQTVYMPATAKFH  
FELSPMQVLITENSKSFSHFITNVCAIIGGVFTVAGILDSILHHTVRMMKKVELGKNF

**NCBI Reference Sequence: XP\_006370647.1**

>P.trichocarpaPDI-C2

MVSTNKLKSVDFYRKIPRDLTEASLSGAGLSIVAALAMVFLFGMELNNYLTVNTSTSVIVDNSSDGEFLRI  
DFNLSFPPLSCEFASVDVSDVLGTNRLNITKTIRKFSIDHDLKPTGSEFHSGPVLHHINHGDEVHEEGSEG  
SVSLKAHNFDQYTHQYPILVVNFYAPWCYWSNRLKPSWEKAAKIIRERYDPEIDGRILLAKVDCTEEGDLC  
RRNHIQGYPSIRIFRKGSDLRDDHGHHDHESYYGDRDTESLVKTMEGLVAPIAMESQRHALEHKPENATEH  
VKRPAPSAGGCRIEGYVRVKVPGNLVISARSGAHSFDSAQMNLSHVISHFSFGMKVLPVMSDVKRLIPH  
IGRSHDKLNGRSFINHRDVGANVTIEHYLQVVKTEVVTRSSAEHKLIEEYETAHSSLAQTVYMPATAKFH  
FELSPMQVLITENPKSFSHFITNVCAIIGGVFTVAGILDSILHNTFRMMKKVELGKNF

**NCBI Reference Sequence: XP\_007141162.1**

>P.vulgarisERV-A1

MEGIMSKLRNLDAYPKINEDFYRSTLSGGVITLASSIIMLLFFSELRLYLQSVTETKLVVDTSRGETLRI  
NFDVTFPALPCSILSLDAMDISGEQHLDVKHDIKRLDSDHGNVIESTRQEGIGAPKIEKPLQRHGGRLEHN  
ETYCGSCFGAEASDDCCNSCEDVREAYRKKGWALSNPDLIDQCKREGFLQRIKDEDGEGCNVYGFLEVNK  
VAGNFHFAPGKSFQQSGVHVHDLALFQKDSFNLSHHINRLSYGEYFPGVVNPLDNVHWIQETPSGMYQYFI  
KVVPTVYTDVNGHAIQSNQFSVTEHFRTGDVGRQLQSLPGVFFFYDLSPKIVTFTEEHVSFLHFLTNTVCAIV  
GGIFTVSGILDSFIYHGQRAIKKMEIGKFN

**NCBI Reference Sequence: XP\_007159091.1**

>P.vulgarisERV-A2

MDKVFNKLRNLDAYPKVNEDEFYRSTLAGGVTVVSAAVMLFLFFSELNLYLYTVTESTLLVVDTSRGTDLHI  
NFDVTFPAVRCSILSLDAMDISGEQHLDIRHNIVKKRIDANGNVIEERKDGIGAPKIERPLQKHGGRRLGHD  
EKYCGSCFGAEETDEQCCNSCEEVREAYRKKGWALSNMDLIDQCQREGYVQVRVKDEEGEGCNIQGSLEVNK  
VAGNFHFATGKSFQSAIFLADLLALQDNHYNISHRINKLSFGHHFPGLVNPLDGVKWWQGPHTHGMYYQYFI  
KVVPTIYTDIRGRVIHSNQYSVTEHFKSSELGVAVPGVFFFYDISPIKVNFKEEHIPFLHFLTNTVCAIIGG  
IFTVAGIIDSSIIYQGRTIKKMEIGKYT

**NCBI Reference Sequence: XP\_007145973.1**

>P.vulgarisERV-B

MGMKQVIKNLDAFPRAEDHLLQKTQSGALVSVIGLIIMATLFFVHELRYLTYTVHQMSVDLKRGETLPIH  
INMTFPSLPCDVLSDAIDMSGKHEVDLDTNIWKLRLNSDGHIIGTEYISDLVEKGGHTHHKHDDHDKHDEH  
SEQKIHLQNLDESTENI IKKVKEAIKNQEGCRVYGVLDVQVRVAGNFHISVHGLNIYVAQMI FGDGAKNVNVS  
HVIHDLDFGPKYPGIHNPDDTNRILHDTSGTFKYIKVVPTEYRYISKEVLPTNQFSVSEYYSPINQFDR  
TWPVAVFLYDLSPITVTIKEERRSFLHFITRLCAVLGGTFAVTGMLDRWMYRLIEALTKSKSKR

**NCBI Reference Sequence: XP\_007149711.1**

>P.vulgarisPDI-C1

MISSKCLKSVDFYRKIPRDLTEASLSGAGLSIVAALCMVFLFGMELNSYLSVSTATSVIVDKSSDGDYLR  
DFNMSFPALSCEFAAVDSDVLGTNRLNLTKTIRKFSIDSNLRSTGNEFHSEPTTTNIKHDNEQHEESIGG  
ALELTTDNFDKYAHQFPITVINFYAPWCYWSQRLRPSWEKASKI IKERYDPEIDGRIVMGRVDCQNGELC  
RSHVQGYPSIRIFRKGSDVRTDHGHHDHESYYGDRDTESLVKTMDNLVASLPTESQKSHSGDKSNLASHI  
KRPAPSSGGCRIEGYVRVKVPGNLIISARSDAHSFDASQMNMSHVVNHLVSGRQVSPRMSDVKRLIPYV  
GSSHDRLNGLSFINTRDFGANVTMEHYLQIVKTEVITRKDHKLVEEYETAHSSVAQSLHIPVAKFHLELS  
PMQVLITENPKSFSHFITNVCAIIGGVFTVAGILDSILHNTIRLMKKVELGKNF

**Phytozome Phaseolus vulgaris v1.0 proteome: Phvul.011G139400.1**

>P.vulgarisPDI-C2

MISATKLKSVDFYRKIPRDLTEASLSGAGLSIVAALSMFLFGMELSNYLTVSTSTSVIVDKSSDHDYLRI  
DFNISFPALSCEFASVDVSDVLTGNRLNITKTVRKFSIDSHLRPTGAEFHSGAVSNAVKHDDEVDGESVEG  
SFSFTTHNFDKYAHQFPITVVNFYAPWCSWCQRLKPSWEKTAKIMKERYDPEMDGRIIMGKVDCTLEGDLC  
RRNHIQGYPSIRIFRKGSDLRSEHGHEHESESYYGDRDTESLVEFMENLVTSLPTASQKPALEDKSNATDNA  
KRPGPSAGGCRIEGYVRVKVPGNLIISARSDAHSFDASQMNMSHVNNLSFGKKVTPRAMSDVKLLIPYL  
GSSHDRLSGRSFNSNTRDFGANVTIEHYIQIVKTEVVNRKGYKLIEEYETAHSSVAHSVDIPVAKFHIELS  
PMQVLITENQRSFSHFITNVCAIIGGIFTVAGILDSILHNTIRMMKKVELGKNF

**NCBI Reference Sequence: XP\_002447951.1**

>S.bicolorERV-A1  
MDGLLSKLRSLDAYPKVNEDFYSRTLSSGGVITLASSVIMLLLFVSELRLYLHAVTETTLRVDTSRGETLRI  
NFDVTFPALQCSIIISLDAMDISGQEHLDVKHDVFKQRIDAHGNVIATRQDAVGGMKMEAPLQHHGGRLEHN  
ETYCGSCYGAQESDQCNSCEDVREAYRKKKGWVSNPDLDDQCKREGFLQSIKDEEGEGCNIYGFIEVVK  
VAGNFHFAPGKSFQQSNVHVHDLDPFQKDSFNVSHKINRLSFGGEYFPGVVNPLDGASWVQHSSYGMYYQFI  
KVVPTVYTDINEHIILSNQFSVTEHFRSGESGRMQALPGVFFFYDLSPKIVTFTEQHVSFLHFLTIVCAIV  
GGVFTVSGIIDSFVYHSQRAIKKKMEIGKFN

**NCBI Reference Sequence: XP\_002465347.1**

>S.bicolorERV-A2  
MELWSKLRNLDAYPKVNEDFYSRTLSSGLLITILSSLAILLFFSEIRLYLYSATESKLTVDTSRGERLHIN  
FDVTFPALPCSLVAVDTMDVSGEQHYDIRHDITKKRIDHLGNVIESRKDRVGPAPIERPLQKHGGRLDHNE  
VYCGSCYGAEEETDDQCCNSCEEVRDVYRKKGWAINNVELIDQCKREGYVQRLKDETEGEGCTIHGFVNVNKV  
AGNFHFAPGKSLDQSFNQLDILLNIQPETYINISHKINKLSFGGEFPGVVNPLDGVEWIQDNSNGLTGMYQY  
FVKVVPTIYTDIRGRKIYSNQFSVTEHFREAIGYPRPPPGVYFFYEFSPKIVDFTEENTSLHLHFLTIVCAI  
VGGIFTVAGIIDSFVYHGHRAIKKKMELGKLG

**NCBI Reference Sequence: XP\_002439992.1**

>S.bicolorERV-A3  
MDAFLQRLKRLDAYPKVNEDFYKRTLSSGIVTLVAAVVMLLLFISETRSYFYSATETKLVVDTSRGERLRV  
NFDITFPSPICPTLLSVDTMDISGEQHDIRHDIEKRRLDSHGNVIEARKEGIGGAKIERPLQKHGGRLDKG  
EQYCGTCYGAEEESDEQCCNSCEEVREAYKKGWALTNPDLIDQCAREDFVERVKTQQDEGCNVHGFLDVSK  
VAGNFHFAPGKGFYESNIDVPELSVLEGGFNITHKINKLSFGTEFPGVVNPLDGAQWIQPASDGTYYQFIK  
VVPTIYTDIRGHNIHSNQFSVTEHFRDGNILPKPQPGVFFFYDFSPKIVIFTEENRSLHLHFLTIVCAIVGG  
VFTVSGIIDSFIYHGQKALKKKMELGKYR

**NCBI Reference Sequence: XP\_002458688.1**

>S.bicolorERV-B  
MARIPSLKSLNAPPHAEHLLKKTYSGAVVTILGLLVMITLHVHELQFYLTYYTVHQMSVDLKRGETLPIH  
INMSFPPLPCEVLSVDAIDMSGKHEVDLHTNIWKLRLDKYGHIIIGTEYLSDLVEKKGHGAHHDHHDGQEHHD  
EQKKPEQTFNEEAEMIKSVKQALGNGEGRVYGMLDVQRVAGNFHISVHGLNIFVAEKIFEGSSHVNVSH  
VIHELSTFGPKYPGIHNPLDETSRILHDTSGTFKYYIKVVPTIYKYLKSKVLPTNQFSVTEYFLPIRPSDRA  
WPAVYFLYDLSPITVTIKEERNFLHFITRLCAVLGGTFAMTGMLDRWYRLIESVTNSKTRSVLR

**Phytozome *Sorghum bicolor* v2.1 proteome: Sobic.002G322400.1**

>S.bicolorPDI-C  
MISSKLRKSVDFYRKIPRDLTEASLSGAGLSIVAALAMVFLFGMELSNYLAVNTTTSVIVDRSSDGEFLRI  
DFNISFPALSCEFASVDVSDVLTGNRLNIRKTVRKYSIDRNFPVPTGSEFHPGPIPTVKNKHGDDVEEDHVDG  
RFLSSRNRFDSFVSHQYVPLVVNFYAPWCYWSNRLKPSWEKTAKIIRERYDPEMDGRILLGKVDCTEEVDLC  
RRHHIQGYPSIRVFRKGSIDIKENQGHHDHESYYGERDTESLVAAMETYVANIPKEAHVLALEDKSNKTADP  
AKRPAPMTSGCRIEGFVRVVRVPGSVIVAARSGSHSFDPSQINVSHYVTQFSFGKRLSHRMLDEFTRLTPY  
LSGYNDRLAQSYIVKHGEVNAVNTIEHYLQVVKTEIVTQRSSKELKVLVEEYETAHSSLVHSFYVPVVKF  
HVEPSPMQVLVTEVPRFSHFITNVCAIIGGVFTVAGILDSIFHNTLRMVKKVELGKNI

**NCBI Reference Sequence: XP\_004237893.1**

>S.lycopersicumERV-A1  
MDSFVSKIRSLDAYPKINEDFYSRTLSSGGVITLASSIIMTLLFISELRLYLHAATETKLVVDTSRGETLRI  
NFDITFPAIPCSILSVDAMDISGQHLDIRHDIKRRIDVLGNVIETRKEGIGSPTIDRPLQRHGGGRLEHN

ETYCGSCYGAEGSDDDHCNTCEDVREAYRKKGWALTNPDEIDQCKREGFLEKIKEEEGEGCNMYGFLEVNK  
VAGNFHFAPGKSFQQSNVHVHDLTTFQKDSYNI SHKINRLTYGEYFPGVVNPLDGVKWTQETPHGMYQYFI  
KVVPTVYTDVSGHTIQTNQFSVTEHFKGADGFRFQSI PGVFFFYDLSPIKVTFTTEQHASFLHFLTINVCAIV  
GGVFTVSGILDSFIYHGQKAIKKKMELGKFS

**NCBI Reference Sequence: XP\_004230558.1**

>S.lycopersicumERV-A2  
MERVFSKLRNLDAYPKINEDFYNRTLSSGGIITLVASVIMLVLFVNELGLYIHSYTETQLVVDTSRGGKLIH  
HFDITFPVAVPCSLLSLDARDISGEEHFDIRHDI FKKRIDSHGAVIEVRQDGIGAPKIEKPLQRHGGRLLEHN  
ETYCGSCFGAETADDECCNSCEEVREAYRKRGGWMTNPDLDQCKREGFVQKIKDEEGEGCNIHGSLEVNK  
VAGNFHFAAGKSFHQSTFQLFELISLQSDTYNISHRVNKLAFGDSIPGVVNPLDGVQWTQEAQNGMYQYFI  
KVVPTIFKGVGRGTIDSNQFSVTEHFKGSDLGLFQSI TGVYFFYDLSPIKVTFTTEHVSFFHFLTINVCAII  
GGVFTVAGILDACIYHSQKAIKKKVELGKFG

**NCBI Reference Sequence: XP\_004243621.1**

>S.lycopersicumERV-B1  
MGVKQVLRAMDAFPRAEEHLLQKTKSGAFVSI VGLVIMSTLFLHELSSYLLNTITVHQMAVDLRRGETLPIH  
INMTFPSLPCDVLSDVAIDMSGKHEVDLDTNIWKLRLNSDGHITGTEYLSDLVEKEHKHDDHKDHHDDSDN  
KTHMQGFDQEAENLIKVKQALAHGEGCRVYGVLDVQRVAGNFHISVHGLNIFVAQMI FGGTTHVNVSHII  
HDLSFGPKYPGGHNPLDGTERRILRGASGTFKYYIKIVPTEYRYLSKEVLPTNQFSVSEYFSPINEFDRTWP  
AVYFLYDLSPIITVTIREERNFLHFITRLCAVLGGTFALTGMLDKWMMFRFLEAVMKNRSRSLVR

**NCBI Reference Sequence: XP\_010313686.1**

>S.lycopersicumERV-B2  
MGVKQALRAIDAFPRAEHLLKTKFGAFVSI VGLLIMVTLFLHELSSYLLNIYTVHQMSVDSRRGENLPIH  
INMTFPSLPCDVLSDVAIDMSGKHEVDLDTNIWKLRLNSDGHITGTEYLSDLVEKEREAHKHVDVHKEHHED  
SDKIHLQGIDEE SQNMIKKVKQALADGEGCRVYGVLDVQRVAGNFHLSVHGLNIFVAQMI FEKSTHVNVSH  
II HDLSFGPKYPGIHNPLDGTSRILRGTSGTFKYYIKVVPTEYRYISKEVLPTNQFSVTEYFSP IHD FERT  
WPAVYFLYDLSPIITVTIREERSFLHFITRLCAVLGGTFALTGMLDGWMYKILES SVTKKNSRTIVR

**NCBI Reference Sequence: XP\_004244141.1**

>S.lycopersicumPDI-C  
MVSTSKIKSVD FYRKIPRDLTEASLSGAGLSIVAALCMMFLFGMELNNYLTVSTTTSVIVDKSSDAEFLRI  
DFNMSFPALSCEFASVDVSDVLGTNRLNITKTVRKHSIDKNLRPTGSEFHSGSTATLKHDAEDDEEYEGEG  
SVSLNGHSFDRVTHHFPILVVNFFAPWCYWSNRLKPSWEKAANI IRERYDRES DGRILVAKVDCTEEVDLC  
RRNHIQGYPSIRIFRKGTDVRRDDHGHDHESYGGDRDTSLVKMMEDLVAPIKLDSTITSDNSSTKLETG  
LKRPAVPTGGCRIEGFVRVKKVPGNLVISARSAHSFDASQMNMSHVISSFSFGKTI TPKVMSDIKILLPH  
LGRSHDRLNGNSYVTNPRDSTENVTIEHFLQVVKTEVMTRS YKLVVEEYETAHSSLVHSLHIPVAKFH YEP  
SPMQVLITENPKSFSHFLTINVCAI IGGVFTVAGILDSILHNTMRMVKKVELGKNF

**NCBI Reference Sequence: XP\_002977139.1**

>S.moellendorffiiERV-A  
MQMLKKLQQLDAYPKINEDFHSRTLSSGGVITVVSSIFMAILFITELKLFLLPGTTSELLVDTSRGETLQIN  
FDITFPALACSVISLDAMDVSQEHLVDVKNHIFKKRLDPGKVVQPPVQEDIGGPKIDKPLQKHGGRLEHN  
ETYCGSCFGAEQSDDECCNSCEEVREAYRKRGWAIHNADLDQCKREGWLT KIKEEEGEGCNIYGSLEVNK  
VAGNFHFAPGKSFQQHVHVHDVQSLHKEKFNVSHYINELSFGARFPGVVNPLDKEKRIQKFP SAMYQYFI  
KVVPTAYTDMTGHKIVTNQFSVTDHFKAVEGLNGRSLPGVFFFYELSPIKVLFTERKTSFLHFLTINVCAII  
GGVFTVSGIIDSFIYHGHRAIKKKMEIGKYI

**NCBI Reference Sequence: XP\_002993277.1**

>S.moellendorffiiERV-B  
MGLKMKNNINAFHADEHLLTQKTVSGAILTIVGVSIIILVLFAYEFK FYLSTNVVHQMSVDTTTRGQNLPIHIN  
ITFPSLPCQILSDVAIDMSGKHEVDLDTNIWKLRLHKDGHILGSEYLSDLVEKEHAHDNLTGIFHSHEELR  
SAVKVVNEINKALQDGEGRVFGVLDVERVAGNFHISMHGMSLQVARQIFHSVKEVNVSHIINDLSFGPKY  
PGIHNPLDRTVRILRDTAGTFKYFIKIVPTEYRYLNGGKLP TNQFSVGEYLLAARDDDISWPAVYFLYDLS  
PITVLIKEERRSFGHLLTRFCAIVGGTFSLTGMLDRWIYRLVESITRAKGVLI



**NCBI Reference Sequence: XP\_002982011.1**

>S.moellendorffiiPDI-C  
MTTASKIKSIDFYRKIPRDLTEASLSGAGLSLIAAFAMIFLFGMELNNYLTVSSTTNVVVDRSKDGEYLRI  
QFNMSFPALSCEFASVDVSDALGTNRYNLTKTVRKYPIDPNLKIVGPEFHPGPIPNPTSHGDDHEGEGAH  
VLTSSTFDEYARRYSVLVNFYAPWCIWSARLKPSWDKAAGIIAEKYHPDTGRILLGKVDCDNDLCKRH  
HIQGFPSIRIFHKGHDLKDEHGHHEHDSYYGERDTSLSVKAMEALVPKETTLLALEDKTNGTVKRPAPRAGG  
CRIEGFIRAKK[VPGNIIISAHSGSHSFDASAMNMTHYVSQFTFGRELNFWMRRELYRIYPHLASVYDTVE  
ANLTGRIYVSQHENITHDHYLQVVKTEVVSRLKRKEFSLLEQYDYTSHSNTIQNTNVPVAKFHYESLSPMQV  
LVKENPKSFSHFITNVCAIIGGVFTVAGIVDSMLHGAMRMVKKIELGKQF

**NCBI Reference Sequence: XP\_006354000.1**

>S.tuberosumERV-A1  
MDSFISKIRSLDAYPKINEDFYRSLSGGVITLASSIIMTLLFISELRLYLHAATETKLIVDTSRGETLRI  
NFDITFPAIPCSILSVDAMDISGEQHLDIRHDIKKRIDVLGNVIETRKEGIGSPTIDRPLQRHGGRLEHN  
ETYCGSCYGSEGSDDHCNCTCEDVREAYRKKGWALTNPDEIDQCKREGFLEKIKEEEGEGCNMYGFLEVNK  
VAGNFHFAPGKSFQQSNVHVHDLTLFQKDSYNISHKINRLTYGEYFPGVVNPLDGMWWTQETPHGMYQYFI  
KVVPTVYTDVSGHTIQSNQFSVTEHFQGADGFRFQSI PGVFFFYDLSP IKVTFTEQHVSFLHFLT NVCAI V  
GGVFTVSGILDSFIYHGQKAIKKK MELGKFS

**NCBI Reference Sequence: XP\_006351793.1**

>S.tuberosumERV-A2  
MERVFSKLRNLDAYPKINEDFYRSLSGGIITLVASIIIMLVLFVNELGLYIHSYTETQLVVDTSRGGKLHI  
HFDITFPAVPCSLLSLDARDISGEEHFDIRHDIKFKRIDSHGAVIEVRQDGIGAPKIEKPLQRHGGRLEHN  
ETYCGSCFGAETADDECCNSCEEVREAYRKRGMWALTNPDLIDQCKREGFVQKIKDEEGEGCNIHGSLEVNK  
VAGNFHFAAGKSFHQSTFQLFELISLQSDTYNISHRVNKLAFGDSIPGVVNPLDGVQWTQEAQNGMYQYFI  
KVVPTIYKGVGRGTIDSNQFSVTEHFQGS DLGLFQSITGVYFFYDLSP IKVTFTEEHVSFFHFLT NVCAI I  
GGVFTVAGILDACIYHSQKAIKKKVELGKFG

**Phytozome *Solanum tuberosum* v3.4 proteome: PGSC0003DMT400002424**

>S.tuberosumERV-B1  
MGVKQVLRAMDAFPRAEEHLLQKTKSGAFVSI VGLVIMSTLFLHEL SYLLNTITVHQMAVDLRRGETLPIH  
INMTFPSLPCDVLSDVAIDMSGKHEVDLDTNIWKLRLNSDGHITGTEYLSDLVEKEKHDDSDNKTHMQGF  
DQDAENLIKKVKQALAHGEGCRVYGVLDVQVRVAGNFHISVHGLNIFVAQMI FGGTTHVNVSHI IHDL SFGP  
KYPGSHNPLDGTERRILRGASGTFKYIYIKIVPTEYRYSKEVLPNTNQSFSVSEYFSPINEFDRTPAVYFLYD  
LSPITVTIREERRNFLHFITRLCAVLGGTFALTGMLDKWMMFRFLEAVMKKDSRGLVR

**NCBI Reference Sequence: XP\_006351995.1**

>S.tuberosumERV-B2  
MGVKQALRAIDAFPRAEHLLQKTKFGAFVSI VGLLIMVTLFLHEL SYLLNIYTVHQMSVDSRRGENLPIH  
INMTFPSLPCDVLSDVAIDMSGKHEVDLDTNIWKLRLNSDGHITGTEYLSDLVEKEHEVHKHDAHKEHHED  
SDKIHLQGIDEE SQNMIKKVKQALADGEGCRVYGILDVQVRVAGNFHLSVHGMNIFVAQMI FEKSTHVNVS  
IIHDL SFGPKYPGIHNPLDGTSRILRGSSGTFKYIYIKVVPTEYRYISKEVSPNTNQSFSVTEYFSP IHD  
FERT WPAVYFLYDLSPITVTIREERSFLHFITRLCAVLGGTFALTGMLDGWMYKILESFTKKN SRTIVR

**NCBI Reference Sequence: XP\_006366039.1**

>S.tuberosumPDI-C  
MVSTSKIKSVDFYRKIPRDLTEASLSGAGLSIVAALSMMFLFGMELNNYLTVSSTTSVVVDKSSDAEFLRI  
DFNMSFPALSCEFASVDVSDVLGTNRLNITKTVRKHSIDKNLRPTGSEFHS GSTATELKHDAEDDEEYEGEG  
SVSLNGHSFDRVTHHYPILVNFYAPWCIWSTRLKPSWEKAANI IRERYDRES DGRILVAKVDC TEEVDLC  
RRNHIQGYPSIRIFRKGSDVRDDHGHHDHESYGDRTDSLVMMEDLVAPIKLD SQMISSDNSSTKLETG  
LKRPAVPTGGCRIEGFVRVKKVPGNLVISARSAHSFDASQMNMSHVISSFSFGKTI TPKVMSDIKILLPH  
LGRSHDRLNGNSYVTNPRDSTENVTIEHFLQVVKTEVMTRSYKLVVEEYETAHSSLVHSLHIPVVKFH YEP  
SPMQVLITENPKSFSHFITNVCAIIGGVFTVAGILDSILHNTMRMVKKVELGKNF

**NCBI Reference Sequence: XP\_007018816.1**

>T.cacaoERV-A1

MDGIMNKLRLNDAYPKINEDFYSTRLSGGVITLVSSVVMFFLFFSELRLYLHAVTETKLVVDTSRGETLRI  
NFDVTFPALACSI LSLDAMDISGEQHLDRHDI IKKRLDAHGNVIESRQDGIGAPKIEKPLQRHGGRLLEHN  
ETYCGSCYGAEASDDDDCCNSCEDVREAYRKKGWALSNPDLVDQCKREGFLQKIKDEEGEGGCNIYGFLEVNK  
VAGNFHFAPGKSFQQSNVHVHDL LAFQKDSFNISHKINRLAFGDYFPGVVNPLDGVHWTQE QPSGMYQYFI  
KVVPTVYTDVSGHTIQSNQFSVTEHFKGAEINRLQSLPGVFFFYDLSPIKVTTFTEQHVSFLHFLTIVCAIV  
GGVFTVSGILDSFIYHGQRAIKKKIEIGKYS

**NCBI Reference Sequence: XP\_007042992.1**

>T.cacaoERV-A2

MENVFNKLRLNDAYPKVNEDEFYSTRLSGGIITLVSSLAIFFLFFSEFRLYLHTVTETKLLVDTSRGEALRI  
NFDVTFPAIPCTLLNLDAMDISGEQHLDIKHDI IKKRINAHGDVIESRQDGIGAPKIEKPLQRHGGRLLEHN  
ETYCGSCFGEAQSDDDCCNSCEEVREAYRRKGWAMTNVDLIDQCKREGFIQRVKDEDEGEGCNIHGSLEVNK  
VAGNFHFAPGKSFHQTNIFLSDLLAFQKDSYNI SHRINRLAFGEYFPGVVNPLDGAQWIHETSNGMYQYFI  
KVVPTIYTDIRGRTVHSNQYSVTQHFNLEVIYPNSHPGVFFIYDFSPIKVTFKEEHISFLHFITNICAVI  
GGIFTVAGIIDSFVYHGQRRMKKKMEIGKFR

**NCBI Reference Sequence: XP\_007048888.1**

>T.cacaoERV-B

MGVKQALKSLDAFPRAEEHLLQKTQSGALVSIVGLVIMAALFFHELTYLTTYTVHQMSVDLKRGETLPIH  
INMTFPSLPCDVLSDVAIDMSGKHEVDLDTNIWKLRLNLSLQIVGTEYLSDLVEKEHAHKKHDDKEKHDD  
SDKKLHALGFDQEAENMIKKVKQALANGEGCRVYGVLDVQRVAGNFHISVHGLNIYVAQMI FGGATHVNV  
HMIHDL SFGPKYPGLHNPLDGTVRILHDTSGTFKYIKIVPTEYRYSKEVLP TNQFSVSEYFSPMHEFDR  
TWPVAVFLYDLSPIITVTIKEERRSFLHFITRLCAVLGGTFALTGMLDRWMMFRLIEGLTKPSHKGVLR

**NCBI Reference Sequence: XP\_007021017.1**

>T.cacaoPDI-C

MISSSKIKSVDYRKYIPRDLTEASLSGAGLSIVAALAMMFLFGMELSNYLTVSTSTSVIVDKSSDGEFLRI  
DFNISFPALSCFEFASVDVSDVLGTNRLNITKTIRKFSIDPHLRSTGAEFHAGPVPHF IKHGDEVEDEETVEG  
RVPLNGVDFKLSHLYPILVVNFYAPWCYWSNRLKPSWEKAAKI IKERYDPEMDGRILLAKVDCTEEVDLC  
SRHVIQGYPSIRIFRKGSDLREDHGHHDHESYYGDRDTESLVKTMEELVAPI PLESQKLALEDKSNITKRP  
APKTGGCRIEGYVRVKKVPGNLIISARSAHSHFDASQMNMSHVISHL SFGKTI SPRVLSVKRLIPYIGRS  
HDRLNGRSFINHRELDANVTIEHYLQIVKTEVVTRRSREHTLIEEYETAHSSLAQSIYIPVTKFHFELS  
PMQVLITENPKSFSHFITNVCAIIGGVFTVAGILDSILHNTIRLMKKVELGKNF

**NCBI Reference Sequence: XP\_002285801.1**

>V.viniferaERV-A1

MDNIINKLRLNDAYPKINEDFYSTRLSGGVITLASSIFMLLLFISELRLYLHAVTETKLVVDTSRGETLRI  
NFDVTFPALPCSI LSLDAMDISGEQHLDRHDI IKKRIDAHSVIEARQDGIGSPKIEKPLQKHGGRLLEHN  
ETYCGSCYGAEASDDDDCCNCEEVREAYRKKGWAMSNPDLIDQCKREGFLQRIKDEEGEGGCNIYGFLEVNK  
VAGNFHFAPGKSFQQSNIVHDL LAFQKDSFNISHKINRLAFGDYFPGVVNPLDGVQWIQATPSGMYQYFI  
KVVPTVYTHVSGHTISTNQFSVTEHFRNAELGRLQSLPGVFFFYDLSPIKVTTFTEEHVSFLHFLTIVCAIV  
GGVFTVSGILDSFIYHSQKAIAIKKKIEIGKFS

**NCBI Reference Sequence: XP\_002264644.1**

>V.viniferaERV-A2

MDRVFQRLRLNDAYPKINEDFYSTRFSGGLITLISSIVMLFFLFFSELRLYLHTVTETKLVVDTSRGGTLRI  
NFDVTFPAVPCSVLTLAMDISGEQHHDIKHDIVKKRIDAHGNVAVRQDGIGGPQIEKPLQRHGGRLLEHN  
EKYCGSCYGAEVTD DDDCCNSCDEVREAYRKKGWGMTNPDLIDQCKREGFVQKVKEEGEGC NVYGFLEVNK  
VAGNFHFSPGKGFYQSNIVNDLLAISKDGYNISHRINKLAFGDHFPVVNPLDGAQWFQDAPDGM YQYFI  
KVVPTIYTDIRGHTIQSNQFSVTEHFRSAEPGRPHSLPGVFFFYDLSPIKVTSKEEHSSFLHFMTNICAVI  
GGIFTVSGIIDSFVYHGHRRAIKKKMELGKFS

**NCBI Reference Sequence: XP\_010656946.1**

>V.viniferaERV-B

MGVKQFIKSLHAFRAEEHLLQKTQSGAVVSIIGLVIMATLFLHELRYLTTYTVHQMSVDLKRGETLPIH  
INMTFPSLPCDVLSDVAIDMSGKHEVDLDTNIWKLRLNRDGFIIIGTEYLSDLVEKEHADHKKHDKHNDHHDG  
SDQKLHAHSFDQDAENMVKKVKQALANGEGCRVYGVLDVQRVAGNFHISVHGLNIFVAQMI FGDGAIHNVNS

HI IHDLSFGPKYPGLHNPLDGTVRILRGASGTFKYYIKIVPTEYRYISKEVLPTNQFSVMEYFSPMNEFDR  
TWPAVYFLYDLSPVTVTIKEERRSFLHFITRLCAVLGGTFALTGMLDRWMYRFLEMLTKPNAKSVYR

**NCBI Reference Sequence: XP\_002281649.1**

>V.viniferaPDI-C

MVSTSKIKSVDLYRKIPRDLTEASLSGAGLSVIAAALSMMFLFGMELSNYLSVSTSTSVIVDQSSDGDFLRI  
EFNISFPALSCEFASVDVSDVLGTNRLNITKTIRKYSIDPDLRPTGAEFHSGPVGKVIKHGDETDDEEYSEG  
SASLTAQNFKYKSHQHAILVVNFFAPWCYWSTRLKPSWEKAAKIIRERYDPELDGRIVMAKVDCTEEGELC  
RRHHIQGYPSIRIFRKGSDVRDDHGHHDHESYYGDRDRTLVTMETLVAPIPLESQRLALENKSDSTADH  
IKRPAPRTGGCRIEGFVRVKKVPGNLVISARSGSHSFDPSQMNMSHVISHLFGRKIAPRVMSDMKRVLPY  
IGGSHDRLNRSYISHPSDSNANVTIEHYLQVVKTEVITTRDHKLVEEYETAHSSLVQSLYIPVAKFHFE  
LSPMQVLVTENRKSFWHFITNVCAIIGGVFTVAGILDSVLHNTMRLMKKIELGKNF

**NCBI Reference Sequence: NP\_001148795.1**

>Z.maysERV-A1

MDGLLSKLRSLDAYPKVNEDFYSTRLSGGIITLVSSAVMLLLFVSELRLYLHAVTETTLRVDTSRGETLRI  
NFDVTFPALQCSIIISLDAMDISGQEHLDVKHDVFKQRIDAHGNVIATRQDVVGGMKMEAPLQHHGGRLEHN  
ETYCGSCYGAQESDDQCCNTCEDVREAYRKKKGWVSNPDLDDQCKREGFLQSIKDEEGEGCNIYGFIEVVK  
VAGNFHFAPGKSFQQSNVHVHDLFPQKDSFNVSHKINRLSFGGEYFPGVVNPLDGANVWQHSSYGMYYQYFI  
KVVPTVYTDINEHIILSNQFSVTEHFRSGESGRMQALPGVFFFYDLSPIKVTFTQHVSVFLHFLTNVCAIV  
GGVFTVSGIIDSFYVYHSQRAIKKKMEIGKFN

**NCBI Reference Sequence: NP\_001141198.1**

>Z.maysERV-A2

MDAFLQRLKRLDAYPKVNEDFYKRTLSSGGIVTLVAAVVMMLLLFISETRSYFYSATETKLVVDTSRGERLRV  
NFDITFLSIPCTLLSVDTTDISGEQHDIRHDIEKIRLDAHGNVIEARKVSIKAKIERPLQKHGGRLDKG  
EQYCGTCYGAEESEDEQCCNSCEEVREAYKKGWALTNPDLDQCAREDFVERVKTQQDEGCNVHGFLDVSK  
VAGNFHFAPGKGFYESNIDVPELSLLEGGFNITHKINKLSFGTEFPGVVNPLDGAQWTQPASDGTYYQYFIK  
VVPTIYTDIRGHNIHSNQFSVTEHFRDGNVRPKPQPGVFFFYDFSPIKVIIFTEESRSLHLHYLTNLCAIVGG  
VFTVSGIIDSFIYHGQKALKKKMELGKYR

**NCBI Reference Sequence: NP\_001132255.1**

>Z.maysERV-A3

MDAFLHRLKRLDAYPKVNEDFYKRTLSSGGIVTLVAAVVMMLLLFISETRSYFYSSTETKLVVDTSRGERLRV  
NFDITFSPSIPCTLLSVDTTDISGEQHDIRHDIEKRLNSHGNVIEARKEGIGGAKVERPLQKHGGRLDKG  
EQYCGTCYGAEESEDEQCCNSCEEVREAYKKGWALTNPDLDQCAREDFIDRVKTQQDEGCNVLGFLDVSK  
VAGNFHFAPGKGFYESNIDVPELSLLEGGFNISHKINKLSFGTEFPGVVNPLDGAQWTQPASDGTYYQYFIK  
VVPTIYTDIRGRGIHSNQFSVTEHFRDGNVRPKSQPGVFFFYDFSPIKVIIFTEENRSLHLHYLTNLCAIVGG  
VFTVSGIIDSFIYHGQKALKKKMELGKYR

**NCBI Reference Sequence: XP\_008654279.1**

>Z.maysERV-B

MARIPSLKSLNAFPHAEHLLKKTYSGAVVTIFGLLIMITLFFVHELQFYLTTTYTVHQMSVDLKRGETLPIH  
INMSFPPLPCEVLSVDAIDMSGKHEVDLHTNIWKLRLDKYGHIIIGTEYLSDLVEKGGHGAHHDHDDHDDHDD  
EQKKHEQTFNEEAEMIKSVKQALNGEGCRVYGMLDVQRVAGNFHISVHGLNIFVAEKIFEGSNHVNVSH  
VIHELDFGPKYPGIHNPLDETSRILHDTSGTFKYYIKVVPTEYKYLSKKVLPTNQFSVTEYFLPIRPTDRA  
WPAVYFLYDLSPITVTIKEERNFLHFVTRLCAVLGGTFAMTGMLDRWMYQLIKTVTNSKTRSVLR

**NCBI Reference Sequence: NP\_001105762.1**

>Z.maysPDI-C

MISSKLSKSVDFYRKIPRDLTEASLSGAGLSIVAALAMVFLFGMELSSYLAVNTTTTSVIVDRSSDGEFLRI  
DFNMSFPALSCEFASVDVSDVLGTNRLNITKTVRKYSIDRNLVPTGSEFHPGPIPIPNKHGDDVEEDHVDG  
AFSLSSRNFDSPSHQYPVLVVNFYAPWCYWSNRLKPSWEKTAKIMRERYDPEMDGRILLGKVDCTEEVELC  
RRNHIQGYPSIRVFRKGSDIKENQGHHDHESYYGERDTESLVAAMETYVANIPEKAHALEDKSNKTVDPK  
RPAPMASGRIEGFVRVKKVPGSVVISARSGSHSFDPSQINVSHYVTQFSFGKRLSPRMLHEFIRLTPYLR  
GYHDLRAGQSYTVKHGEVNNANVTIEHYLQVVKTELVTQRSSKELKVLVEEYETAHSSLVHSFYVPPVVKFHF  
EPSPMQVLVTEVPKSFHSFITNVCAIIGGVFTVAGILDSIFHNTLRMVKKIELGKNI

**Phytozome *Chlamydomonas reinhardtii* v5.5 proteome: Cre13.g579850.t2.1**

>C.reinhardtiiERV-A

MSGGGFLGKALKALDAYPKINEDFFTKTMSGGIIITIVSSVVMVLLFLSELRLFLTTSSAHELSDVDVGRGEKI  
KIHFDVTFPKVPCAWLSLDAMDISGELHLDLDHDVYKQRLNANGSPVKEVEKHNV DATKKKPPSAVNATAS  
AAAGGAPAGGAAGAAGAEGGAAGGAGGGENATALANGCGSCYGAEDKQGDCNCTCDEVRAAYRRKGWALS  
VDHIEQCAHDLYTEAIKEQAGEGCHMWGMLEVNKVAGNFHFAPGRSYQQGSMHVHDIAPFGDAVIDFRHVI  
HKLSFGEPYPGMKNPLDGAKAGQAAAAAAAAATGMFQYFLKVVPTS YTDLSNKTLSTNQFSVTENFREAQGG  
AGRTLPGVFFFYDLSPIKVKIVEHGSSFLSFLTSVCAIVGGVFTVSGIVDAFVYTGTRMIKKKMKELGKFS

**Phytozome *Chlamydomonas reinhardtii* v5.5 proteome: Cre08.g358579.t1.1**

>C.reinhardtiiERV-B

MKGGRFRLSSLSAYVKPEAHLVNQTIHGALVTLGCVLLATLLTLHEIKSFIYQMRVTVLSVDLARRHALTIN  
LDITFPSVPCAVLSIDVLDISGTAENDASFAHMRVHKMRLDKAGNQIGKAEYHTPQSQQIMDTGGEQLVS  
VNIQEAMQHLVDMEDEADHHEGCHVYGTMEVKRVAGRLHLSVHQNMVFMQLPQLLGTTHHHPKILNMSHVIK  
HLGFGPHYPGQLNPLDGYVRMVGREPFYKYFLKVVPT EY YNRLGRATETHQYSVTEYAQPLQRGYAPAVD  
VHYDLSPIVMTINERPPSLLHFVVRLCAVVGGVFAITRLTDRWVDWLVRVLVNKAAARGP

**NCBI Reference Sequence: XP\_001699770.1**

>C.reinhardtiiPDI-C

MVRLFSRLKAIDFFKKIPSDLTEATLTGAWLSIVA AVMILLFVAELSAFLSTTTSSQLVVD RSPQNELLK  
LNFNISFPALSCEFATVDVSDSLGTRKMNLTKT VTKVPI TLDMERQGAAVEDTAHKVGP KYDAEGHFDEEP  
DIDITVPLSHENFEATLARYPIAVINFYAPWCHWCQRLEPTWEAATKEVHDKYPEWDGRVRFKAVDCTAEV  
DLCRQHFIQGFPSIRVFRKGHDDIYIGMHEHEAYMGDRTKDALVAFADSLVPSAGQPHRKLAGLSAAPT  
PGCNLAGFVMVKKVPGTVHFVARSEGH SFDHTWMMNTHMHSFHVGT RPSRKYQQLKRLHPAGLTADWAD  
KLHDQLFVSEHTQSTHEHYLQVVLTTIEPRHSRHTGN YDAYEYTAHSHSYQSDSIP SARFTYDLSPIQILV  
HETSKPWYQFLTTSCAIIIGGVFTVAGILDALLYQSFKVVKLNLGKQG

**NCBI Reference Sequence: XP\_005650551.1**

>C.subellipsoideaERV-A

MEGIVSKLKNLDAYPKVNEDFFQRTLSSGGIIITIGSSIIIMLCLFLSEL SLMFKITTTNELSVDTTRGDQLSI  
NFDMTFPALPCEWISLDLMDISGEMHLDVDHDVYKRR LDSNGVVI PDSIEKHQVGP ELDLTLHKANETEC  
GSCYGAAPDEECCNCEEVRAAYRRKGWGFTDPQQISQCAKEGFVEKLRAQEGEGCHMWGSLAVNKVAGNF  
HFAPGKSFQQGPMHVHDLVPPFQGVTFDLSHRIDKLSFGHEYPGMTNPLDRVNLPKFNTRNPQGLPGAYQYF  
LKVVPTIYVNSHNHTINSNQYSVTEHFKGSQDFQAQLPGVFFFYDLSPIKVKYHETRMSFLHFLT SVCAIV  
GGIFTVAGIVDAFIYHGHAIAIKKVDL GKQI

**NCBI Reference Sequence: XP\_005651581.1**

>C.subellipsoideaERV-B

MKLKSFNRFSA YARAESHLVQRTYFGAIVTVLGVILAIVL FANELREYTPPFSIQTMSVDTSRAHYIRMNF  
NFTYPSMPCQVLSLDATDMSGEKSGDSGHAANGEIHKVRLNEAGEKIGLGEYIPRRWGFMMGKPRQ-EVM  
EVNQAMDAHEGCNIFGWLDLQRVAGNFRVSVHVEDFFALTRLQADTTGINSSHIIHRV SFGPTFPQGVNPL  
DGAERILDKESGTFKYFLKVVPT EY VKLDGTRTTTNQYSVTEYD TVVHKGEMQMPSVWFSYDISPISVTIS  
EIRKSFALLVRFCAVVGGVFAV TGMFDRWVHRIVTAIFSASS

**NCBI Reference Sequence: XP\_005642637.1**

>C.subellipsoideaPDI-C

MARVLQKLRSLVDFYRKIPNDL TEATLAGAGISLVAAFTIVVLLTAE LSSFLAIETKEELIVDRSAHGDLR  
INFNISFPALSCEFATLDVSDALGTRKMNLTKTIRKLPIDEDGQRAGYYVHDDL SNVDIKYDEPSVSQDFA  
LPLSKDSFKATLEAYSIVVNFYAPWCPWCQRLEPTWEAVTQEVHTKYPDADGRIRFAKVDCTTEVDLCRE  
HQITGFPSIRVFRSGHDEVNVHGVEHESYRGDR TQASLLAFADNLAPSAGQPHHYIRGVTRMAK TSGCAL  
SGFVLVKKVPGALHFLAKSPGHSFDYQAMNMSHV VNYLYFGNKPSPRRHQSLAKLHPAGLSDDWADKLAGQ  
DFFSRAAKATFEHYMQVVLTTIEPSKRP ELSYDAYEYTVHSHTYDTADIPAAKFTYDLSPIQILVSEKRR  
AWYHFVTTTTCAIIIGGVFTVAGIVDGLVHTGARFAKKVELGKHT

**NCBI Reference Sequence: XP\_002948747.1**

>V.carteriERV-A

MSNSGGGFSLKALDAYPKINEDFFTKTMSGGIITIVASVVMVLLFLSELRLYMTTQSVHELSDVDVGRGE  
KIQIHFDLTFPKVPCSWLSLDAMDISGELHLDLDHDVYKQRLSANGSPVKEVEKHNV EATKKVVPVNGTEN  
STATPVC GSCYGAEDRQGDCCNTCDEVRAAYRRKGWALANVDHIEQCAHDLYTESIKEQTGEGCHMWGMLE  
VNVK VAGNFHFAPGRSYQQGSMHVHDIAPFGDAVIDFRHTVNKLSFGAPYPGMKNPLDNAKAGYKSAAATGM  
YQYFLKVVPTS YTGIDNKTLATNQFSVTENFRESSQGGAGKTLPGVFFFYDLSP IKVRIVEHSSSFLSFLT  
SVCAIVGGVFTVSGIVDAFIYTSTR LIRK KME LGKFS

**NCBI Reference Sequence: XP\_002958233.1**

>V.carteriERV-B

MKFKLSSLSAYVKPEAHLVQQT VHGALVTLCGILL AAMLFVHELGSFYRQHRVTQMSVDLARRNALTINID  
LTFPAIPCAVLSIDVLDIAGTAENDASYAHMH I HKLR LDGAGKPIGKA EYHTPQSQQIMDTGAEQLVSVN  
IQEAMQH LVDMEEEAEHHEGCHVYGTMDVKRVAGRLHFSVHQNMVFQMLPQLLGAHRI PKVANI SHTIKHL  
GFGPHYPGQLNPLDGYVRMVKGPPQSFKYFLKVVPT EYYNRLGRVTETHQYSVTEYTQPLEPGYVPTLDVH  
YDLSPIVMTINERPPSLLHFVVR LCAVVGGAFAITRMTDRWVDWVRLVTKLK

**Phytozome *Volvox carteri* v2.0 proteome: Vocar20014205m**

>V.carteriPDI-C

MARLFSKLKAIDFFKKIPSDLTEATLTGAWISILA AVIMVFLFTAEMMSFLSTTTTTQLIVDRSPQNELLK  
LNFNISFPALSCEFATVDVSDTLGTKRMNLTKTVRKMPITTELERMGSAVEDSSHKPGPKYDEEGRFDDEP  
DIDITVPLSHVNFEATLARYPIVVVNFAPWCHWCQRLEPTWEAATKEVHDKYPEWDGRIRFAKVDCTQEM  
ELCRTHFIQGFPSIRVFRKGHDDIVIGGMHEHESYMGDR TKEALVAFADSLVPSAGQPHRKHAALSAAPKT  
PGCNLAGFVMVKKVPGTLTVVARSEGH SFDHTWMNMTHLVHTFHVGTRPSPRKYQQLKRLHPAGLTHDWAD  
QLRDQFFLSEHPQSTHEHYLQIVLTSIEPRRSRHS GNYDAYEYTAHSHTYQSDAIP SARFTYDLSP IQILV  
QETARP WYQFLTTSCAIIGGVFTVAGILDALLYQSFKVVKKLNLGKQG
