# Supplementary material for: Phylogenetic characterization and promoter expression analysis of a novel hybrid protein disulfide isomerase/cargo receptor subfamily unique to plants and chromalveolates
Source: PubMed Central journal article supplement (PMC4729789; doi:10.1007/s00438-015-1106-7), 2015-08-25
Supplement: 438_2015_1106_MOESM2_ESM.pdf [file 438_2015_1106_MOESM2_ESM.pdf]

## Non-plant PDI-C Isoforms

### NCBI Reference Sequence: XP\_005716385.1

>C.crispusPDI-C1

MLKLSSYDVFRKLPRDLTHGTSQGGVLSVLAVALILLVFLFELWTVYVAGEVETAVMLDTNREALLQINFK  
VTALRLPCEFAFASVDVWDYLGNTRLDLTKNLHKTMTVSGPRGRDILGAYSDGNFASNGDSEDEVKAHIGLSE  
SEEIMQSNFDQKLAENAWTFVDFPAPWCIHCVKLAPTWEAFKTVHDKDIRVKVFKVDCTKNEFLCRSQQ  
ISGYPTLRVYKGNHPQHPDYFGKRTVSTLISWEMSMTHEHAHAKTRLHKEEGCLVEGAIWVNRVPGNFHI  
TAKSKGHDFDPKAMNLSHVVHHFSFGKPLPRRVIRHLPDDVKRNINPLDGRS FVNTEEHTTHEHYIKVVS  
THYRVGKSSIFNREDSLGYQMATS NHRYKSDPGIPEAKFSFDLSPTAVV I IQGGKRWYEFVTSLCAIIGG  
IFTVVS LFDGAMYSISKRVKGVQGKLS

### NCBI Reference Sequence: XP\_005715706.1

>C.crispusPDI-C2

MFKISMLDLFRKVPVDLTQATRGGLLSLAVATIIIGLVLFCEVWPTYLEGETKSRIILDSNTESKLEINFE  
ISFFELPCRANVEVWDYLGNAKLNVDADISKTILGHEQENENHLETKDKGT VATQLVDKHEDAHLPEQV  
VELTSSNYGQYLKQNEYTFVIYYVNWCGFCKMALPVWSKFAKHLPSIRPNVKIAQVDCEKNAELCQATKI  
TGYPTFIMFKGVNPLEEDYGGERSVEAFSKYVEKVS DTPDDHNLKYQWQEGCLLGGRLLVNRVPGNFHI  
SAKSDAHNFDQKSTNTSHLIHHL SFGGEMQHDLYMAVPKDIRVNI SPLDDILFINHKEHMSHEHYIKVVS  
THYQAGSLRRRKDVLGYQMATS NHQYKSDPNVPETRFSDLSPTAVVISQAGR R WYEF L T S L C A I I G G T F  
TTFSLMDGVLHSMQRRLARPVTPSSKLT

### The *Porphyridium purpureum* Genome Project: evm.model.contig\_3636.1

>P.purpureumPDI-C1

MRLAVYDLYRKVREGAESTVTGGF LSVLGVALIVVLGIAETVSFLGAPKSMAVEVDRNMDES LQVNL D I L  
LMRMP CNMVSLETWDYTGTSQLRHEDLSTKYVVF GDQGEFNLGEAGVMGHLEHMKNEHLL EQVTHEAAEE  
LVDANFASKLNKEPLAIVKFYTPWC IWCQRLVPHFAALPDALA QVGLPGTKL FKVNCVENLESCRGIAGF  
PTVRYFVKGKQP TPDYRGDRTAQDMAQWVANGVKKVDSASGETNKFVVRKQAHGTVMRRVADENLPEGCR  
IIGALKVSRVPSNIHIVAAATTFDINPREVNLSHRVNI F SFGSMMSPQRLLR LPIFAQYNVNP FNGQSFV  
ATEKHILFDHYLKVVTTRFARHRGKRAWSLDDALQDRRAYLV TASTKSTIADPNVPEIRFSYDFSPFATV  
VFQKTDKTYDYLTNL CALIGGVW TILQLV DSTL FNLVH SKIKTMOGKLG

### The *Porphyridium purpureum* Genome Project: evm.model.contig\_2262.7

>P.purpureumPDI-C2

MVVVEGNRASKAAWRMRFGELDLFRKVPDRDLVQSTR LGGALSLLALALLSVLLMTELS DMGRATTSTSLQ  
VDRAPSS EPVTL SFRIALMSL PCKYVDVQLLDTRLRTATQSQR LVLKKT ELADGAKYLD SLSKPLEQIRR  
YDKQGVVRPLGAPEEDNDSADQSGVTITVEQFRNNIVTRSPYTLVYFYLPYCPFKSLVPVWEEVERKIS  
SDVARFSRGVIKVVKIDCITSKELCIDQHMAVPTIRVYERDTVLRPDYHS AKREAEDILAWVLGKITGA  
DAKRAAAA SGQDAAREISSKEGCVVSGSAQVQKSPAFMRI SANAENYSVEAQHVNMTHLVEYFTANYEIP  
GD TTSK LHPMIALNLD TMHHTAFVTSK SQEGMSFDHYLKF IPTTYRSRWGPKQRL FQMTAASHGYKQHG  
AAEIRVSYDFSPLVHVVEKQNTKQWYEF LAKLFAIIGGVICVVG LMDKGIYTYVAYQQKVRQKQI

### NCBI Reference Sequence: XP\_005786077.1

>E.huxleyiPDI-C1

MGIADALESLHLRYKVPDRDLTDATRLGGAI SLATAFLMAYLFLSNIAEFMSVRSSTDVALDDSTEAKMRI  
YFNITMERLPCQFASVDVSDVMGTS LTNVTQHIIKFKVAPEAGHRKA EYYRERDD DVEHEVLDDEEQGYL  
DTLPATLPQLNDHSFEQTIKSYDLVLVAFGAPWCPWSQR LDPVWRKTWELLKQKPYRDHVRIGKVDCTAS  
DSHSTCQKHHIHAFPTIRIYRHRQVHSHENYLG NRDSAVFIEFVEEALPKHLVTGGGGAPLDADKAAAAA  
RSVESHTLAGEGCQLTGSLEISRVPGSFRISAQSDAHSFN SRVMNVSHHV DKL LFAYTDERPAKTHKVIS  
IEERS SLYQMGMFMH QELATLKH YLKVVPFH HHDLSGHV TQAYLYKANYEYRPRKLEWYEGKADAHVDT  
QMVPNAVFFHYDISPVKVVVQEESEALAAFVTKICAVIGGIYTVVGLLDSVMYHSVQSF SSKK

### NCBI Reference Sequence: XP\_005782141.1

>E.huxleyiPDI-C2

MVRLRDAHFFRKVPVDVSEGTAVGGLLSVA AVL VACWL VSEEISAYSTAKLTTQMALDHTAMPSP LGPAA  
YESIRVNFNISM LRI PCQYATL FVSDHVG AHKSGGARNMHKVR LDREGRSLGMYS PHRYAGSYRPGPYQL  
DDGTALDEQGFQALAKSKAGVMVNFAPWCFWSQKLP AWEAVGRRLHARAYSQSFAFVRVDCTSAKGRD

LCRSHSIHAFPTVRTYRGSVHAFEPYEGREENVIWLHMVKIAAEVQRMHDPSPLEDEGSPLEWEEE  
AGHEGCNLFYVEVSRAPGTIHLAPHSSRHSFDFSHVNTSHHIDHLSFGLELGAIERGLPPDVRKHLLS  
LDGRAFTAATAHLTQEHVNIIVPTRYQPAGSVAHVETYQFTATSHARTKDTLPSLLISYDVSPIQVNI  
LRQPTSELVLSFCAIIGGVAVFGIIDGMLYTGSAVVRQKLSAGKLG

**NCBI Reference Sequence: XP\_005783917.1**

>E.huxleyiPDI-C3

-----MGRKSYGPNLNYFKHVPDDLVTSTPGLIISALGTVVLITLFLFELSAYLTVTSTT  
DLVVDELVDETLRVNFNVTLHQVPCFELSVDVSDMTGAATHDIRKDILKWRLDSNQRVVRDAAAVSAVET  
RDAKRAADAAMSKEPVSPSYGDEDEEEPPDSDLQPLSPDTFVFPFLOQHELVLNFIYAPWCICQRLPEV  
YLEAAAKVPSLEFHGHTRLAQVDCVAFQEFVCKHMIRAYPTLRMYKDGNDKEFELFTDERSVGAAILGFVR  
KQMDSYRTSHAVLRKQHAARFEVRRGALSAGRDLYRAKMPIVAANTFCGNNEECIGFTYAAEEMPAKDAK  
PDPFMPGENPLIYFKSGRAGEAQVNADKQWTSYLKINNTAPVSSGSLHHGPEGCMVAGHLRVRKVPVGV  
LKLVLHSPHDHEHALINSSHAVNEFWYGEPLSRFQRSRLSEADRFEIDSPTSHRLESIPFISDAAGDSH  
VHYLKVVTKVVRHYSARDADTLVYKYTVHSNKYSSPEAQEPSVDFKYDLSPISIVVQQQRMPPAYRFVVTST  
CAIIGGVFTVIGIIEAVLHTATESFLKKQM

**NCBI Reference Sequence: XP\_005830975.1**

>G.thetaPDI-C1

MSGFLQGLKSVDFYRKLKRDLDLQELTEASVSGAALSIIAAVIMIGLVAAELTAYLTVQSESRVVDLHDFES  
SSDDTLQVNFNFTFPHLKCDYASVDATNFMGTHDAGLAARVSKIRLDKNGNLVGRHDDNKKELRHTTDEV  
HDGPETSIALTTDNFEASHHKYAIMIVNFIYAPWCHWCQRLAPVWEKSAATIAQKFPGDERIILAKVDCTH  
QSSEALCIKYRIDAFPTILVFRKDDKGDQSHESYHGERSVPAITQWAEHFMSQLNNEVPKSRVTDANKDG  
VVDSHNGVGCVMVSGLLHVQRAPGMLKVQAVSDSHEFNWETMDVSHTVNHLVSGPFLSETAWMVLPPIIAA  
SVGSLDDRSFTSDQHVPPTTHEHYVKVVRHEVTPSSWKVAQITSYGYVVHSNNIQKAGEVPTVRINYDIL  
PIIVQFHEKKQAFYHFVTNLCAIVGGVFTVAGIIASLMDKSINLMRKKQELGKLG

**NCBI Reference Sequence: XP\_005841401.1**

>G.thetaPDI-C1

MPTLAQMALSWRKIKHDLNAELTEGTTIGSIIISILTGVLVYLIVAQIFAWRALNSETSVVLDHYSHMKT  
GADSLQINFNFTFNHLSCEYASVDAANFMGTHDAGISSKVTKVHLDKNGRQLGVHKKERKNLKHITIDEAP  
HEGESKLITLTAGDFDKHRFEHEILVVNFYTPWCHWCQKLEPVWEKSAKKGAEHPDDARLVLAKVDCTS  
DKAESLCTKYHIDAFPSIMVFRKDDPLDKDHEKYHGERSVDAIVSWAEHLMKQVNLQAPKSRVVDKEQDG  
EKESHNGVGCVMVAGMLHVQRAPGSIILQAVSDGHEFNWATMDVSHTVNHLVSGPFLSETAWVMPPIAQA  
AVGSLDDKKFLSEERTPTVWEHYVKVVKVVELPRSWGIPVVEAHGYVVHTNKVQRYAEVPTARINYDIL  
PIIVHVKTSRESNYHFLTKLCAIVGGVFTVSGIFASMVEGGIASLTHKETIGKLG

**JGI Genome Portal: estExt\_Genewise1Plus.C\_230042**

>B.natansPDI-C1

MQSLKQDFDYKRIIPADFRVQTSGGGTISMLAALFMTLLFTLELWSFIAGHESTTIVVDQDSATSIWVNFN  
VTVPSCHCDHISVDVEDMLGTVMMDIQKNVEKVPDENGEQMPDLHSHHHAAPKDHVSEAENLVANEAT  
TKDTYPEPTVLAADTFTKYVDSHEWVVFYFGASWCHWCQKLDPIWKSAGEVLKNRGAAITLPKVECTKDT  
LCQEHQVHALPTIQLFHNGHLVPPNYRGPRTVNDLVHFAENAAVSKKKAEEAKVANKGKTRSDVGCSSVSG  
HLLVHRVPGSVQFSVKSGEHNFNREHINFTHVVHHSFNVSVPESWEQMLAVMEDDSHRALVSKWYGRNFN  
SPKDHVVHEHYLKVVTQTLRPLGLSSEKQMYEHTISSHSYVSEQLAHVRFHYDLSPMQVVKWKRRPFYE  
FITNLLALIGGTFTVMGIVNEAYNGVVAKARMGKLG

**JGI Genome Portal: aug1.35\_g11347**

>B.natansPDI-C2

MSVNDALKHFDYKTIQTDIRDKTVAGGAVSLLAAVIMGTPIHSITIDHDHNSPTAGAFWVNFIDITLPA  
ITCDHISVDVEDRLGSRIFDIQKNVEKIPLDKEGVEAAILPDEIHIKAPDGHVTLKELQDVVANPDI  
TNDTVNLEADKFMWVESHEWVSLVFRVDWCPWCQMLVPIWKSSAVILSNREVPVPLATVECTKHMDLCK  
EAGVTAFTPTIKLYHWGKHVAPDYKGRKTVNDIVHFAETAADQKAVAEKAGVNVSDTHRSVGVCTVVGHLF  
VHKVPGRIQLSLSDTHTFNREAVNFTHQVHLSFNNDIPETEEEMEAIMLDHEIQDKVSRWLSQFTSHT  
KHTMHEHYLKVVEKRLFKDIRDTAISCVVVKMSSEYVVEYKYNQGGFWANANRIYEHSISSHSYATDSH  
LPVAVKHYDLSPLQVSVHEHQSRPWFSTITMVCALVGGAWSIMSVVNDVATSSGLGKMFADAKTLRASS

**GenBank: ETO29283.1**

>R.filosaPDI-C1

MDVLLKFD AFRKIPKELTNPTLHGAYLTVVAYVVMALLFFMELGAYLSTTVQKSVELDEHFDEHIWIDFD  
VQMFELPCEYTHVVKDIVGNQELEILDQQITKERISVDSNTFKGVIDEEKDAEHRGLNEDIDHHHAQTK  
KYEHEPELEADWDSTSDQFQHNDFNVALEYHDFTMVNFYANWCSHCRNFAPTWKEAEDRTDQMEFRDKNGA  
VVATKLLRVNVCVDFG-----ELCASIGIRAYPTVRLYKHKDSFTQYTG  
PREVQGIVNFITDFIHNEDTGKHEVVTHHSSLQEGCRVHGELLVRRVPGYFLLLEADSKLDSLDPMTNVS  
HRVNHLIVGDRDAMRDYVKNNTASKVTQDILKNVQPMKRANFITSKAHTAPQHYNVIPTRFDDKVVVYQ  
ATVQSHIADVEITSVPQARFQYIFSPLSIHINTKGRPLYDFLTSTVFIIIGGTYTFISLLDKFWDSVSVRL  
KKNIGKL

**GenBank: ETO21548.1**

>R.filosaPDI-C2

MDFLLKFD AFRKIPKELTNPTLHGAYLTLVAYVVMSSLLFTMELYAYLSTSEQKSVELDEHFDEHIWIDFD  
VHMFEHPCEHTHVIVKDIVGNHELEILDQKISKERIGLDSNEFKGLLDEDKDAEHRGLNKDIDHHLAIE  
KSAHEPELEADWDSTSDHFQHTDFNAVLEYHDFTVVNFYANWCIHCRHFAPTWKEAEEETDRMEFRDKNRE  
VVVAKLLRVNVCVDFGDLCARIGIRAYPTVRLYKHKDSFTQYTGPREKQSIINFVKDFIHNEDTGKHEVVA  
HHRLQEGCRVHGELLVRRVPGYFFLEAESKLDLDPFMTNVSHRVNHLHIVGDRAAMQDYAKRTASQVT  
RDIKNTPEPMKSTSFITFKPHTAPQHYNVIPTRFDDKVVVYQATVQSHLADVEITSVPQARFQYVFSPL  
SIKVSTKGRPLYDFLTSTVFIIIGGTYTFISLIDKFWDTISVRFKTQINKLT

**GenBank: CCI45882.1**

>A.candidaPDI-C1

MGAMDVLKWKDFYKIPEDLTVSTLPGVSLDIVGCFIMLILFILEFNAYLTVNYAYDIVIDEGLDEKFEI  
NFNITIPDLPCFASIDVSDMTGTRKHNMTKHKVAKIRMDGKGRLLGLANAEITHPKYANDDYGDLPESD  
AVVTKLDASNFESFLKEHHYVAVDFPAPWCWCKRLEPIWTRVAKTLPPLSHYGQRMRVASVDCDDHADLC  
MKQFVRAFPTILFYKDGGETSPVEMYGDRTEAFVDKFKKIFDGEVDDTEVRKKVLFQDTKHAIQLGRV  
APKNAGPEGCQLYGH LIVKRVPGNFHILSHPSYSMNSSLVNASHTVNELWFGETLSASALAKLP PPHTRL  
DSHRLAQEFTAYMENYTYVHYIKVVNTNTYVQRNGEAI SAYRYTAHSNEYLETEDLPSVMFRYDLS PMSV  
RVTERAMPFYHFVTSACAIIGGVFTVIGIIDQLVHQTVRAMNKKVL

**GenBank: CCI46463.1**

>A.candidaPDI-C2

MVPKSFSKFDLFRKVPDHLSEHSSLGTVFTVLTFLVLSVYLILVNFERSYQGTSNHSIVIMDDHQEDQLRIN  
FNISLLAIPCQFASVDVSDYIGMQLINITRHLRHFQLATTDQSSSHVQRVQEIFIHDNSKGLPIWGGVSR  
TTRQGVHYSHQLDTEFTFDVYMKKYELVLINYYAQWCPFSQQLNPEWEKAAAQLQDHPYSETVAMATVDC  
TDRKSAWLCRRAHVRAFPSMLIYIYGNTYTRYIYNGPRDANHILQFLDLFYRRLEPDMDFAEETFLSEGT  
GGLAHHQGLNHKNLQSLNAENSQKKVKLPVGAVEGCEVSGSLNVNRVPSRLVFTARSKDLSFDLSGINVT  
HIVHLSFGQVTRKQYSKATQSSMSFDHFSMDGKIFRTENENITVEHFLSVIGVNHMEAKSKRFLVERT  
YEIVARSNQYNATDMLPAALFTFDISPLVIQLSLDSMPLYRFITSLCAIVGGMVTIIGFVDAGVFHTMNS  
IKRKRRLGKLN

**GenBank: CCI46462.1**

>A.candidaPDI-C3

MPMVPKSFSKFDLFRKVPDHLSEHSSLGTVFTVLTFLVLSVYLILVNFERSYQGTSNHSIVIMDDHQEDQLR  
INFNISLLAIPCQFASVDVSDYIGMQLINITRHLRHFQLATTDQSSSHVQRVQEIFIHDNSKGLPIWGGVSR  
SRTTRQGVHYSHQLDTEFTFDVYMKKYELVLINYYAQWCPFSQQLNPEWEKAAAQLQDHPYSETVAMATV  
DCTDRKSAWLCRRAHVRAFPSMLIYIYGNTYTRYIYNGPRDANHILQFLDLFYRRLEPDMDFAEETFLSE  
GTGGLAHHQGLNHKNLQSLNAENSQKKVKLPVGAVEGCEVSGSLNVNRVPSRLVFTARSKDLSFDLSGIN  
VTHIVHLSFGQVTRKQYSKATQSSMSFDHFSMDGKIFRTENENITVEHFLSVIGVNHMEAKSKRFLVE  
RTYEIVARSNQYNATDMLPAALFTFDISPLVIQLSLDSMPLYRFITSLCAIVGGMVTIIGFVDAGVFHTM  
NSIKRKRRLGKLN

**GenBank: CCA19024.1**

>A.laibachiiPDI-C1

MGAMDVLKWKDFYKIPEDLTVSTLPGVSLDIVGCFIMLILFILEFNAYLSVNHAYDIVIDEGLDEKFEI  
NFNITIPDLPCFASIDVSDMTGTRKHNMTKNVSKFRIDTKGRLVGFASDEVTHPKYSNDEEYGELPESD

AIVTKLDATNFESFLKEHHYVAVDFFAPWCIWCRRLPEIWTTRVAKTLPSTLHYGQRMRVASVDCEEHAELC  
QKQFVRAFPSILFYKDGGETSPVEMYYGDRTLESFVNKFKSLFDGEVDMAEVRKKHYLEQDTKDAAKLGLA  
APTNAAGPEGCQLYGHLLVIVKRVPGNFHILSHPPFYSMNSSLVNASHTVNLWFGVLSASALAKLPNTRL  
DSHRLARQEFAYMQNYTYVHYIKVVTNTYVQRNGEVI SAYRYTAHSNEYLETEDLPSVMFRYDLSPMSV  
RITERSMPFFYHFVTSACAIIGGVFTVIGIIDQLVHQTVRAMNKKVL

**GenBank: CCA20033.1**

>A.laibachiiPDI-C2

MTMVPKSFKFDLFRKVPPEHLSESSLGTVFTVLTVLVLSVYLITVNFERSYQDTSIHSIVVMDHQEDQLR  
INFNISLLAIPCQFASVDVSDYIGMQLINITRHLRHFLQATTAAHSPGNVQORVQEI VIHDGDKGLPTWGGV  
SRTTREGVHYSHQLDTEFTDFMFMKKYELVLINYYAQWC PFSQQLNPEWEEAAAQLRDHPEYSETVAMATV  
DCTDQKSAWLCCRRAHVRAFPSMLIYIYGNTYTRYIYNGPRDAAHILQFLDLFYRRLEPDMDFAEETFLSE  
GTGALAHHQGLNQENLQSLNANNPEKNVKLPVGSVEGCEVSGSLNVNRVPSRLVFTARSKDLSDLRGIN  
VTHVVHLSFGQVTRKQSTKSTQLSMSFDHFPLDGKTFRTENENITVEHFLSVIGVDHMEAKSKHMGLVE  
RTYQIVARSNQYNATDMLPAALFTFDISPLVIQMSDSTPFYRFLTSLCAIVGGMVTIIGFVDAGAYHAM  
NSIKRKRQLGKLN

**NCBI Reference Sequence: XP\_008868410.1**

>A.invadansPDI-C1

MGAMDVLKKWDFYKVPEDLTVSTLPGVSLSIIGCVIMFILFVLEFNAYLTVAHDYQIVMDEGLDEMLRI  
NFNITVPLRCEFATVDVSDQTGTRKHNMTTDIYKIRIDSKRRILGMSAEEQPKPYADDSIYGDLPESD  
AVVTVLTPTNFESFLKEHHYVAVDFFAPWCIWCRRLPEIFVRTAKSLPSTLHYGQRMRVASVDCQQYGEELC  
ESQFIRAYPTIMFYKGDGDISPVEMYHGDRTLEAFLAKFKSLFDGEQDFSENRRKQLHEEDKKEAASKGVV  
IAKAPGAEGCQLYGHLMVKRVPGNFHVHLQNPSSYMGVNVASHVVGELWFGEPVAYDQMNRLPKDAHAHL  
YAHRLGREGFISYATEHTYVHYIKVVTNSYVQSNQDVLNVYKYTAHSNEYKEENDMPSIMFRYDLSPMSV  
KISEKSVFFYHFLTSACAIIGGVFTVIGLLDQIIHQTVRALNKKVL

**NCBI Reference Sequence: XP\_009040032.1**

>A.anophagefferensPDI-C1

-MDFYRKVPDELKEASRTGGLSLCACGVVALTLVTEIGAFRLRTEVTRKIDVDTFAGSQLRVNFNLSFPH  
LHCDYASVDLWDKIGRNQANVTQNIKQWQLEDEDGVKRMVQGRNRRAFDIDHDVHHPPIEEMHANGVHVWH  
VNADEWEGLEHHEHYVFDYAPWCLYCQSLRSTWEALAELEKRD LGVAVAAVDCVDNEAFCHDMKVQT  
FPTLRFYHHGEGVNEGEYRFDRTVAALTDVTRKLESENIYRQYPEARVAHAANWNTDHPGCLVSGFLLV  
NRVPGNFHVMASRHSLNLTNRNLSTVHHLVSGVPLTDAQHRKLATIDVRHARTDTLDGEDYHHDDYH  
YAYQHVFVHIVPTKYNLGVFWRDRFAAFQTLHSHLLKYAEHVPPEARFSYDISPMAVVVDTVRVKWDYDFL  
TSLLAIVGGTFALFKLANDTAARLF

**NCBI Reference Sequence: XP\_009040624.1**

>A.anophagefferensPDI-C2

MSGGLKVIDFFRKIPADLTEATVVGATLSIAAGVFMAILFVVELWAFLLSTTIETGVMLDTNAETLLRINFNV  
TMLDLRCDYAAVDVVDVLTNSMNVTKNVEKWQLDETGKRMI FQGRNREQKAIQHDEHHPEIEELHKNGVH  
AMPLDET NFESFLSENYPVFNFFAPWCIWCRRLPEPTWEAMAEEVERLNREVEQVDERSTS IDVDVVKVDC  
VANRNL CGTQRIQAFPTLRFFKDAQY GIDYKQDRTVAAVDFLQKQVELEKT MEDDWHPRRQRMLEIKEH  
PGCMVSGHVLVNRVPGNFHIEARSLHHLNNAAMTNLSHVVNHLVSGTPLAKDMQRKVSYPQFQSVHPLDG  
GIFVSRDYHQVHHHYSKVVSTHFEVGGMMTKSREIVGYQMLAQSQIMHYNEMDVPEAKFSYDLSPMAVLVS  
SKGRRWYDFVTSVCAIIGGTFTVVGIVDAVLYKIIKGGKQL

**NCBI Reference Sequence: XP\_009040131.1**

>A.anophagefferensPDI-C3

MSGGLKVIDFFRKIPADLTEATVVGATLSITAGVFMAILFVVELWAFLLSTTIETGVMLDTNAETLLRINFNV  
TMLDLRCDYAAVDVVDVLTNSMNVTKNVEKWQLDETGKRMI FQGRNREQKAIQHDAHHPEIQELHKNGVH  
AVPLDEANFD MYLSENYPVFNFFAPWCIWCRRLPEPTWEATAEEEVERLNENENES IDVDIVKVDCVANRNL  
CGTQRIQAFPTLRFFKDSQQY GIDYKQDRTVSAMI DFLKQKVELEKT MEDDWHPRRQRMLEIKEH  
PGCMVSGHVLVNRVPGNFHIEARSLHHLNNAAMTNLSHIVNHLVSGTPLARDLQRKVSYPQFQSAHPLDGGSF  
INR DYHQAHHHYSKVVSTHFEVGGMMTKTHEIIGYQMLSQSQVMHYNEMDVPEAKFSYDLSPMAVLVSSKGRW  
YDFVTSVCAIIGGTFTVVGIVDAVLYKIIKGGKQL

**GenBank: CBN74236.1**

>E.siliculosusPDI-C1

MPTIKTFDFYRKIPLDLTETTLQGAVMSGCALFCMLILFLCELRAFLTPEVYTTVAIDSNQDSKLRINFN  
ITMLALPCDYASVDVLDLLGTNKNVMTQNIVKWHTDENGVKREFHGRNKAQEMVKHDDHHRDLDLAHDG  
EHAVPLTSSNFKDFIQGNDNMVDFPAPWCVWCIKLAPTWEAFAEEVERDASLNGKLMVAVDCVEEREL  
CSTQNLMAFPTIRYFKGGVQDGTDYSDRSVTSLSVQYQAKVGGDEKALRRYGRLLKQDYPGCQLSGFIMV  
NRVPGNFHIEARSALHSIDPTAANISHVVKTLKFGTQVPVRGRRVIESGVELEGLPALEDRVYSIDSLHT  
APHHYIKVVSTFVGGGLAKTDNLQYQMMVSSQTMPYEQDQVPEAKFSYDLSPMSVHIKQRRRKWYDFLTSV  
LAIVGGTFTVVGVLNLDNIFRVVVKQKKI

**GenBank: CBN74492.1**

>E.siliculosusPDI-C2

-----MGAWRLLDLYPKIPTD  
LSQSTAVGGWFSTLTGVIMLLLFQVELFSFMSAPIESQVVVDNVLETKLQINFNMSFLDLPCEYLSVDAL  
DVLGSNRVNIITGKEVQKWHLDPOGVKQAFHGRNRQQRDIVQFDEGVVASLQDLHEDGVHAAVLTEENFDT  
WLEHDFTFVAFHAPWCWCQRLMPTLEVLAEVLEESQRGITVGTVDCTTQQNLCTKRFPVRAFPTLKL  
NEEKLLKPDYSGDRTVEAFSTYLYSKADGKPKMKHQKGRKGFPEVGLHDDKWP GCMVTGHIMVNRVPGNF  
HIEAASKSHTFHGATTNLSHIVHMSFGNDPPRRTQTkinRLTEDLRQNAPLDGNVYVANAYHQAPHHYL  
RVVGS MYHLS PMKTPWHGYQIVANSQMMLYDEEEVPEARFSYNI SPMSVLVRSEKRPWYDFVTKVLAIVG  
GTFSMVGLVDAAVFRASRKAGRQLS

**GenBank: EWM21843.1**

>N.gaditanaPDI-C1

MSSKRPSARGMDLYRRVPADLTETSTLGGLSIVAGVFMVALFIVELISFMSHRTETMVVLDHSHDQLIQ  
INFNVTMLDLPCRYAVVDVLDVLTGNRMNVSKNIEKWNLDQAGRRRYFQGRNREERSILHDEHHGALEVL  
LQNGEHAVPLAADSDFEYLESNEFTFVSFYAPWCICQRLAPTWEAFAEHVEEAQIPVKVAKIDCVTHAQ  
LCRDQKVHAFPTLRMFNRARPLPPDYNTDRTLVALTSFVTRKLAVEEKKKSWPERDQEYVEHPGCMLSGH  
LLVNRVPGNFHIEARSVHNLNAAMTNLSHVVNHL SFGPLYDSQVLSRLERFSSEFYVSNALDGRDFVLE  
EPHKAHHHYLKVVGTLYEVP MRWGRADMLTYQMLPETSMTYGLDEVPEAKFSYEVSPMAVIVKKTGRRW  
YEFVTS LCGILGGTFTVVGLLDSTLHRL LKPSNLQS

**GenBank: EWM21113.1**

>N.gaditanaPDI-C2

MAPVSSRGIKSDFYRKVPLDLTEATWHGGLVLSILAILFMLSFLVVELSSFIASSTHSTVVVDFNRDQOI  
RINFNITMLDVPCEFATVDVLDVLTGNQNVTKNIEKWNLDQNAQR RMFQGRNREQRDLVHDDHHPALDL  
AHQDGEHALPLGKDDFAGFVAGQEYVFANFYAPWCVWCQRLAPTWEAFAEALERQQFNKVVKIDCVEHR  
DLCAESVIRAFPTLRLYKAGKAISP DYREDRTVEALTSYIERTLDLHAKVASSAPEHREKIERTLFAEAE  
HPGCLLSGFLLVNRVPGNFHIEARSKYHNLNPTLTNVSHVVDLTFGPPVTREYREKLALLPKGFQQTRS  
PLADQVYVVS KVHAFHHY LKVVSTHYEVSRTFGGQKSTVLQYQMVANSQVMHYQDDEVPEAKFSYDISP  
LATVISSKKRAWYEF L TSLMAI IGGTFTVLGLLDHMLGKVLKPKKM

**NCBI Reference Sequence: XP\_002182871.1**

>P.tricornutumPDI-C1

MSSVDFYRRVPKDLTEATSLGAIMSVCALVVMGVFLSETAAAFARTGIATSITLDENTSPQIRLNFNITL  
TDLQCDYVSIDVWDALGTNKQNVTKNIDKWQLDAQGIRRI FSGRNREGREVVHDSHDRSLDEIHS EDGKA  
VVDLTADTFDDFMEEHMAFVDLYAPWCVWCQRLAPTWELFAQE VKKEGMPIGVAKIDCMAEADLCRAQR  
VMAFPTLRWYHEGKAVAPDYKMDRTIPALTSFAKRKLDMEKFKEWHSKASDSADPAEVEKKRQLYQQNR  
PDHPGCQVSGHLMVNRVPGNFHLEAKSKSHNLNAAMTNLSHVVNHL SFGEPIDENNRKSKRILKQVPEEH  
RQFAPMDGQAF LTKAFHQAFHHYIKVVSTHLNMGSSDANSMLTYQFLEQSQIVFYDDVNVPEARFSYDLS  
PMSVVVEKEGRKWYDYL TSLCAI IGGTFTTLGLIDATLYKVLKPKKL

**NCBI Reference Sequence: XP\_002177433.1**

>P.tricornutumPDI-C2

MVAPAWAGRVDMYRKVPADLMEGSKSGSYFSYFAVAGMLLLFLMESSEFFAKKLVTDLALDSNKDPRVRL  
NFNITLMDLRCEYAVVDVSVLGTEQNVSSHITKWGVDAEGVRKRYAGRNDQKDIKMFDSVTSTIEEL  
YSDGEDAVSLDEETLEYALRDQQYLFVDFYASWCSHCALAPTWETLAEVMSDVAEDLVEQHDHEYSEEE  
YEHAKKVEMPMIAKIDCVLHKQVCMKQGILGYPTLRLFVDGERWKGGDYRGDRTVVAFADWLQQVEDAH  
KTDTENSSAKNVQLAHMAAKDRLDSEDEGSDEEHEWAEKVKRHKQRLHHSWVDAEHPGCNIAGHLLLDLDRV  
PGNFHIQARSPHDLVPHMTNVSHVVHLSIGEPVAERLIEQEKVILPEDVVKRKLKPMNGNAYVTKELHE  
AYHHYLKVVITTNVDGLKFGKRDRLRAYQILQSSQLSFYRNDI IPEAKFVFDLSPVAVSYRTTSRRWYDYFT  
SILAIIGGTFTVVGLLESTIHATVARKRY

**NCBI Reference Sequence: XP\_002899237.1**

>P.infestansPDI-C1

MGAVDVLKKWDFYKKIPEDLTVSTLPGVSLSIAGCFIMFLLFILEFNLSYLTVDYKYDIVMDEGLDQTMRI  
NFNITVPLDPCFASVDVSDMTGTRKHNMTSDIFKIRLDQKGRMVGLAETQVMRFAEDTEYGDLPDS  
ATVTILDEESFEPFLKQHYYAVDFYAPWCVWCKRLEPVWTRVAKTLPSTLHYGQQLRVASVDCQAHPLC  
MKQFIRAYPSILFYKGDVSPVEMYFGDRTVEAFVDFKFKQLMAGEMDVVEARKKELFEQDKKDAREQGRA  
IARSAVGPEGCRLFGHLYVVRVPGNFHVLNANPAYSMDSSLVNASHTVNELWFGHEHLAPGMSRLPREAQ  
TQLYTHRLENQDFTSLYKNHTYVHYIKVVTNSYVQGDGSEINVIKYTAHSNEYLETDDLPSVMFRYDLSP  
MSVRISEDTVFPYHFVTSACAIIGGVFTVIGIVDQIIHQ TARALNKKVL

**NCBI Reference Sequence: XP\_002899938.1**

>P.infestansPDI-C2

MAKFDFFRHVPEDLKVHTYSGSFFSLLSFAIMGLLLITHWEAYRDQSTKTTVVMDEHQEDRLRVNFVSL  
LNVPCSVASVDLEDHMGQRFTNLTRHIRHFRLGADRSSNEVQRLDEVVIDNHEKGI PVWGGVHRDTKGAN  
VHYSTPLTTKNFDDFMAKYELVLVNFYAPWCPFCHQLHPEWERAQAQLPDHPEYSEMVRMASVDCDTPDA  
VWLCRRRAHIRAFPSMLIYMYGSTSTRYIYNGPRKTEHLLQFLDLFFRLEPDADFAEEVNVNNDRLGLPL  
PVRVSOENLEGIDFKRRPSSTIQTGAVEGCEISGSI SVNRVPGVLVFTARSDDVSFNAQAIDVSHVVNH  
FSFGQVRRTENLLSGDNHVLAAAPSNRFPLDRKIYTIENENVTVQHFMNVVGFQDNQDNTRKTHLQQRSYEFS  
ASTTQYEDQTPSALFTFDISPLVVQITTDNIPFYHFITHLCAVIGGVFTILSLVDSGVFHAMNSIKKKQOL  
GKLS

**GenBank: ETI48787.1**

>P.parasiticaPDI-C1

MGAMDVLKKWDFYKKIPEDLTVSTLPGVSLSIAGCFIMFLLFILEFNLSYLTVDYKYDIVMDEGLDQTMRI  
NFNITVPLDPCFASVDVSDMTGTRKHNMTSDIFKIRLDQKGRMVGLAEEETQVMRFAEDTEYGDLPESD  
ATVTILDEESFEPFLKEHHYAVDFYAPWCVWCKRLEPVWTRVAKTLPSTLHYGQQLRVASVDCQAHPLC  
MKQFIRAYPTILFYKGDVSPVEMYFGDRTVEAFVDFKFKQLMAGEMDAVEARKKELFEQDKKDASEQGRA  
IARSAVGPEGCRLYGHLYVVRVPGNFHILNANPAYSMDSSLVNASHTVSELWFGHEHLAPGMSRLPRDAQ  
TQLYTHRLEDNQDFTSFYKNHTYVHYIKVVTNSYVQSDGSEINVIKYTAHSNEYLETDDLPSIMFRYDLSP  
MSVRISEDSVFPYHFVTSACAIIGGVFTVIGIVDQIIHQ TARALNKKVL

**GenBank: ETI36765.1**

>P.parasiticaPDI-C2

MAKFDFFRHVPEDLKVHTYSGSFFSLLSFAIMGLLLITHWEAYRYQSTKTTVVMDEHQEDRLRVNFVSL  
LNVPCSVASVDLEDHMGQRFTNLTRHIRHFRLAADRSSNQVERLDEVVIDNHEKGI PVWGGVHRDTKGAN  
VHYSTPLTTKNFDDFMAKYELVLVNFYAPWCPFCHQLHPEWERAQAQLPDHPEYSEMVRMASVDCDTPDA  
VWLCRRRAHIRAFPSMLIYMYGSTSTRYIYNGPRKTEHLLQFLDLFFRLEPDADFAEEVNVNNDRLGLPL  
PVRVSOENLEGIDFKRRPSSTIQTGAVEGCEISGSI SVNRVPGGLVFTARSDDVSFNAQAIDVSHVVNH  
FSFGQVRRTENLFKGGSHMLAAPSNRFPLDSKMYTIESENVTVQHFLNVVGFQDNQDNTRKTHLQQRSYEF  
SATTQYEDKTPSALFTFDISPLVVQITTDNIPFYHFITHLCAVIGGVFTILGLVDSGVFHTMNSIKKKQ  
QLGKLS

**NCBI Reference Sequence: XP\_008607386.1**

>S.diclinaPDI-C1

MGAMDTLKKWDFYKKIPEDLTVSTLPGVSLSLVGCIFIMFVLFILFNLSYLSVNYRYDIVMDEGLDEMARI  
NFNITVPLDPCFASIDVSDMTGTRKHNMTKDIYKIRIDSKRRILGMSAEEQMPAYADDSVYGDLPESD  
AVVTMLDEATFEPFLKEHHYAVDFYAPWCICQRLPEVWVRTAKTLPSTLHMGQRMRVASVDCQAHPELC

MTQFIRAYPTIMFYKDGDLSPVEMYHGDRSVEAFTEKFRSLFEGEADYAEQRKKEMHESDKKEAATKGEI  
IAKAPGAEGCQLYGHLYVVKRVPGNFHVHLQNPAYSMDASLVNASHTVGELWFGPEVVPYNDLVRLPKDAHA  
KLYSHRLEGKEFTAYHKEHTYVHYIKVVTNSYVQSNDDVINVKYKTAHSNEYEEKDDLPSIMFRYDLSPM  
SVKISEDSVPPFYHFLTSACAIIGGVFTVIGILDQIIHQTVRAMNKKVL

**NCBI Reference Sequence: XP\_008604596.1**

>S.diclinaPDI-C2  
MAPRFDFFRKIPEDLQTSSTGTSFTTITTVVVMFYLVIAEYAAAYLASSSRTVSRVVMDSHQEDLLRINFN  
ISLTSIPCHHVSVSDVSDHMGQRFANITRHIRRFELTDEGGSTVRGEEVLMADPSSVQRWGAVTHELHDGE  
TVTPSLNDATFDEFMAKYELVLVNYAPWCPFSQALLPIWEQALQLODHPEYSERVMTARVDCQDNAV  
SLCRRARIHAFPSMMIYMYGHTFTRYIYNGPRNAESLLLFLDLFYRRLNPDGDFAEVEVPEFGDLLRLAA  
PQNEEHDDHDEGCELSGSIQVQVPGKLVLYPYSQDQSFDMRDINVTHTINHFSFGQWKSTEQRMNPNRA  
VLSTHYPMDAKHYRALDSNITIEHYIKIVGVDHMDTISFLHQIPERMYEFSASSNQYNATNQVPAALFTY  
DSSPLVIELYQSMPPFRFLTSLCAIVGGVYTVLGLVDAGVFHAVTSVQRKAKLGKLI

**NCBI Reference Sequence: XP\_012193854.1**

>S.parasiticaPDI-C1  
MGAMDTLKKWDFYKIPEDLTVSTLPGVSLSLVGCIFIMFVLFLEFNSYLSVNYRYDIVMDEGLDEMMRI  
NFNITVPLRCEFASIDVSDMTGTRKHNMTKDIYKIRIDSKRRI LGMSAEEQPMPVYADDSVYGLPESD  
AVVTMLDEATFEPFLKEHHYVAVDFYAPWC IWCQRLEPVWVRTAKTLP TLHMGQRM RVASVDCQAHPELC  
MTQFIRAYPTIMFYKDGDLSPVEMYHGDRSVEAFTEKFRSLFEGEADYAEQRKKEMHESDKKEAATKGEI  
IAKAPGAEGCQLYGHLYVVKRVPGNFHVHLQNPAYSMDASLVNASHTVGELWFGPEVVPYNDLVRLPKDAHA  
KLYSHRLEGKEFTAYHKEHTYVHYIKVVTNAYVQSNDDVINVKYKTAHSNEYEEKDDLPSIMFRYDLSPM  
SVKITEDSVPPFYHFLTSACAIIGGVFTVIGILDQIIHQTVRAMNKKVL

**NCBI Reference Sequence: XP\_012197035.1**

>S.parasiticaPDI-C2  
MAPRFDFFRKIPEDLQTSSTGTSAFFTITTVVVMLYLVIAEYAAAYLASSSRTVSRVVMDSHQEDLLRINFN  
ISLTSIPCHHVSVSDVSDHMGQRFANITRHIRRFELTDEGGSTVRGEEVLMADPNSVQRWGAVTHELHDGE  
TITPSLNDATFDEFMAKYELVLVNYAPWCPFSQALLPIWEQALQLODHPEYSERVMTARVDCQDNAV  
SLCRRARIHAFPSMMIYMYGHTFTRYIYNGPRNAESLLLFLDLFYRRLNPDGDFAEVEVPEFGDLLRLAA  
PQNEHDHDEGCELSGSIQVQVPGKLVFYYPYSQDQSFDMRDINVTHTINHFSFGQWKSTEQRMNPNRA  
VLSTHYPMDAKHYRALDSNITIEHYIKIVGVDHMDTISFLHQIPERMYEFSASSNQYNATNQVPAALFTY  
DSSPLVIELYQSMPPFRFLTSLCAIVGGVYTVLGLVDAGVFHAVTSVQRKAKLGKLI

**NCBI Reference Sequence: XP\_002287517.1**

>T.pseudonanaPDI-C1  
MAPFIANLDMYRKVPVDLLEGTRRGSILSTIAIFTMTTLFFLETKAYFSSTLATSALDSNSDPNIRVNF  
NITMMDLKC DYATIDVSVLGTQQNVTQHVQKFPIDQYGVQRQMKARNKNQHDVQLFDSTIQETIEELHA  
DGEDAISLDETTLNVALQENTYVVFVDFANWC SHCRDLAPTWETLAEVMYEAESRVEEHLERNPDHHYS  
DEDYEEAVK VQLPVMIGKIDCVDHGGLCQRMQIQAYPTLKFVVDGEEEMGDYRGHRTVIEMAHFIAEMEKT  
HKGKGGVAQDATE IASDRTIQTKEHEDYARALSASRHHIKHSWHDDEHPGCQISGFLLVDRAPGNFHIQA  
QSKGHDLA AHMTNVSHIINHLSFGKPF SKYFLKDG LKNTPPGFLETTKPF DGNVYITQNEHEAHHHYLKV  
ITTEFEPEKGAQNSKYNKKEPSRAYQILQSSQLSLYRSDIVPEAKFTYDLSPIAVSYNKKYRHWDYDFTS  
LMAIIGGTFTTVGMLESIGHSVSSKKRR

**NCBI Reference Sequence: XP\_002295231.1**

>T.pseudonanaPDI-C2  
MNNISGPGRRSAMSSVDFYRRVPKDLTEATSLGAIMSI CAITVMAILFFSETLAFARTAMVTSIALDEND  
QPQIRLNFNITLMDLHCDFVSDVWDTLGTNRQNVTKNIEKWQLDEDGQRRIFSGRNREQREVVEEHEE  
TLEELHEDGEQAVELHPENFKAFLEGHDMAFIDMYAPWC IWCQRLHPTWEKFGKVEHELGMVGVGKVD  
VVHAQLCKDEKVMFAPTLRWYKDGEAILPDYKMDRTVDALVGYAKRKLDMEQKYKDWE SKNAGGNADARG  
KPRGGTSRPEHPGCQVSGHLMVNRVPGNFHIEAKSVNHNLNAA MTNLTHRNVNLSFGEPITKLP PHMENT  
PFMRKVKRVLKQVPEEHKQFNPMDDTEYVTAQFHQAFHHYIKVVSTHLNMGSSSKSEYSVNDVNAVTVYQ  
MLEQSQIVFYDEVNVPEARFSYDMS PMSVVVQKEGRKWDYDLTSLCAIIGGTFTTLGLIDATLYKVKFKP  
KL

**NCBI Reference Sequence: XP\_002295232.1**

>T.pseudonanaPDI-C3

MYGDINGGGRRRAVGTADLYRHVPKEITE-----ATKIGVVMSLLSIFIM  
ILLFFCETYAFSRSTISSSTIAVDPNSEQLLRNLFNVTLYDLHCDYASVDIWDTLGTNQQNITKDIVKWNL  
DDQGQRKKFAGRNAEQRAVTHEEHDETLQDLADALGGELHAVALDPESIVEFHKRHNGQAIIDFYAPWCI  
WCQRLEPTWEKFARQVSDERINLGVGKVCVTHAQLCKDQRVMAFP TLRWFENGKAVMPDYRGDR TVDAL  
VDYAKRRVGSNEGSNDEEFEEEDHHPGCLISGHLMVNRPGRFQIEARSVNHELHSAMTNLTHRVDLTFG  
ALSGPPGHMLHVL PFFDTVPEKYKHTNPMQDKYYPTYEFHQAFHHHLKIISTHIDYLF SRSTVLYQILEQ  
SQLVFYEEVNVPEIQFSFDLSPMSVNVNSKEGRKWYEYVTSLCAIIGGTYTTLGLINATLLRIFKPKKL
