# Supplementary material for: Phylogenetic characterization and promoter expression analysis of a novel hybrid protein disulfide isomerase/cargo receptor subfamily unique to plants and chromalveolates
Source: PubMed Central journal article supplement (PMC4729789; doi:10.1007/s00438-015-1106-7), 2015-08-25
Supplement: 438_2015_1106_MOESM3_ESM.pdf [file 438_2015_1106_MOESM3_ESM.pdf]

Multiple sequence alignment for NJ and ML trees in Fig. 1

**BLOCK#1**-----

```

O.sativaPDI-C      1 ----MISSSKLKSVDFFYRKIPRDLTEASLSGAGLSIVAALAMVFLFGMELSNYLAVNTS
Z.maysPDI-C       1 ----MISSSKLKSVDFFYRKIPRDLTEASLSGAGLSIVAALAMVFLFGMELSSYLAVNTT
A.thalianaPDI13   1 ----MVSTSKIKSVDFFYRKIPRDLTEASLSGAGLSIVAALAMVFLFGMELSSYLAINTS
A.thalianaPDI12   1 ----MVSSTKLKSVDFFYRKIPRDLTEASLSGAGLSIVAALFMMFLFGMELSSYLEVNTT
A.thalianaPDI7    1 ----MVSTSKIKSVDFFYRKIPRDLTEASLSGAGLSIIAALSMIFLFGMELNNYLAVSTS
P.trichocarpaPDI-C1 1 ----MVSTNKLKSVDFFYRKIPRDLTEASLSGAGLSIVAALAMVFLFGMELNNYLTVNTS
P.trichocarpaPDI-C2 1 ----MVSTNKLKSVDFFYRKIPRDLTEASLSGAGLSIVAALAMVFLFGMELNNYLTVNTS
P.patensPDI-C     1 ----MVSTSKLKSVDFFYRKIPRDLTEASLSGAGLSIIAALTMVFLFGMELSAYLSTTTS
S.moellendorffiiPDI-C 1 ----MTTASKIKSVDFFYRKIPRDLTEASLSGAGLSIIAALFAMIFLFGMELNNYLTVSST
C.subellipsoideaPDI-C 1 ----MARVLQKLRSDFFYRKIPNCLTEATLACAGLSLVAAFTIVVLLTAELSSFLAETK
C.reinhardtiiPDI-C 1 ----MVRFLSRLKADFFYRKIPSDLTEATLIGAWLSIVAALVMILFLVAELSAFLSTTTS
V.carteriPDI-C    1 ----MARLFSKLRKADFFYRKIPSDLTEATLIGAWLSILAALVMVFLFAELMMSFLSTTTT
C.reinhardtiiERV-A 1 --MSGGGFLGKLRKALDAYPKINEDFFTKTMSGGIITIVSSVVMVLLFLSELRLFLTSSA
V.carteriERV-A    1 MSNSGGGFLGKLRKALDAYPKINEDFFTKTMSGGIITIVSSVVMVLLFLSELRLFLTQSV
C.subellipsoideaERV-A 1 ----MEGIVSKLRKALDAYPKINEDFFQRTLGGIITIGSSIIMLCLFSELRLFLKITT
O.sativaERV-A3    1 ----MEGFLQKLRKALDAYPKVNEDEFYKRTLGGVVTVVASVVMVLLFLVSELRSLYFYSATE
Z.maysERV-A2     1 ----MDAFLQRLKRLDAYPKVNEDEFYKRTLGGIVTLVAAVVMLLFLFISELRSLYFYSATE
Z.maysERV-A3     1 ----MDAFLHRLKRLDAYPKVNEDEFYKRTLGGIVTLVAAVVMLLFLFISELRSLYFYSSTE
S.moellendorffiiERV-A 1 ----MQMLKQLQALDAYPKINEDFHSRTLGGVITVVSIFMAILFLFITELRKFLLPGTT
P.patensERV-A1    1 ---MALQMIQKLRKALDAYPKINEDFYSRTLGGIITIIISATFMVLLFSELRLYLAQVA
P.patensERV-A4    1 ----MSFFNKLKRLDAYPKISEDFFYSRTLGGIITLVSSVFMVTLFITELRSLYLAQTTQ
P.patensERV-A2    1 ----MAVFNKLRKALDAYPKISEDFFYSRTLGGVITLVSTVFMVFLFVTELRSLYLAQTTQ
P.patensERV-A3    1 ----MAIFNKLRKALDAYPKISEDFFYSRTLGGVITLVSSVFMVFLFVTELRSLYLAQTTQ
O.sativaERV-A2    1 ----MDLWNKLRKALDAYPKVNEDEFYKRTLGGIITIASLAILLFLSELRLYLYSATD
P.trichocarpaERV-A3 1 ----MEGIYQKLRKALDAYPKINEDFYSRTLGGIITLISSIIIMLFLFSELRSLYLAHVTE
P.trichocarpaERV-A4 1 ----MDRIYQKLRKALDAYPKINEDFYSRTLGGIITLISSVLIILFLFSELRSLYLAHKVTE
A.thalianaERV-A2  1 ----MVGVMNRLKRLDAYPKINEDFYRRTLGGVITLASSIVMLLFLFSELRLYLAHPVTE
O.sativaERV-A1    1 ----MEGLLSKLRKALDAYPKVNEDEFYKRTLGGIITLASSVVMVLLFLVSELRSLYLAHVTE
Z.maysERV-A1     1 ----MDGLLSKLRKALDAYPKVNEDEFYKRTLGGIITLVSSAVMLLFLVSELRSLYLAHVTE
A.thalianaERV-A1  1 ----MAGILNKLKRLDAYPKINEDFYSRTLGGVITLSSVVMVLLFLFSELRSLYLAHTVTE
P.trichocarpaERV-A1 1 ----MEGLMSKLRKALDAYPKINEDFYSRTLGGVITLASSVVMVLLFLFSELRSLYLAHVTE
P.trichocarpaERV-A2 1 ----MDGLMSKLRKALDAYPKINEDFYSRTLGGVITLASSIVMFLFLFSELRSLYLAHVTE
C.reinhardtiiERV-B 1 ----MGKGRRLSSLSAYVKEPEAHLVQQTTHGALVTLGGVLLATLTLHEKSFYQMRHV
V.carteriERV-B    1 -----MKFKLSSLSAYVKEPEAHLVQQTTHGALVTLGGVLLAAMLFVHELGSFYRQHRV
C.subellipsoideaERV-B 1 ----MKLKSFNRFSAAYARAEASHLVQRTYFGAIVTVLGVLLAIVLFAELREYITPFSI
P.patensERV-B     1 ---MRKEKWQVTKNLDAPRAEHLHLLQKTSGAAVSAIGLFLMGVLFVHELRFLYLETVTV
S.moellendorffiiERV-B 1 ----MGL--KMKN--NAPFAHADEHLLQKTVSGAIVTIVGVSIIILVLFAYEFKFYLTSTNVV
O.sativaERV-B     1 ----MGRIPSLKSNAPFAEHLHLLKKTYSGAVTIFGLLIMVTLFAHELRKFYLTTYTV
Z.maysERV-B       1 ----MARIPSLKSNAPFAEHLHLLKKTYSGAVVTFGLLIMVTLFAHELRKFYLTTYTV
A.thalianaERV-B   1 ----MGVKQALRSLDAPFAEHLHLLQKTSGAVVSVIGLLIMATLFLHETSYLNTLTV
P.trichocarpaERV-B1 1 ----MGMKQAIKRLDAPFAEHLHLLQKTSGALVSIIGLVTMATLFLYHETLAYYLTTYTV
P.trichocarpaERV-B2 1 ----MGVKQAIKRLDAPFAEHLHLLQKTSGALVSVIGLVTMATLFLYHETLAYYLTTYTV

```

**ERGIC-N**-----

-----> BLOCK#2 ----->

O.sativaPDI-C 56 TSVIVDRSSDGEFLRIDFNLSFPALSC EFASVDVSDV LGTNRIN----ITKTVRKYSI--  
Z.maysPDI-C 56 TSVIVDRSSDGEFLRIDFNMSFPALSC EFASVDVSDV LGTNRIN----ITKTVRKYSI--  
A.thalianaPDI13 56 TSVIVDKSSDGDFLRIDFNISFPALSC EFASVDVSDV FGTNRIN----ISKTIKRVPI--  
A.thalianaPDI12 56 TAVIVDKSSDGDFLRIDFNISFPALSC EFASVDVSDV LGTNRIN----ITKTVRKYFI--  
A.thalianaPDI7 56 TSVIVDRSADGDFLRIDFNISFPALSC EFASVDVSDV LGTNRIN----ITKTVRKYFI--  
P.trichocarpaPDI-C1 56 TTIVVNDSSDGEFLRIDFNISFPALSC EFASVDVSDV LGTNRIN----ITKTIKRFESI--  
P.trichocarpaPDI-C2 56 TSVIVDSSDGEFLRIDFNLSFPALSC EFASVDVSDV LGTNRIN----ITKTIKRFESI--  
P.patensPDI-C 56 TSVVVDRSRDGEYLRIIDFNLSFPALSC EFASVDVSDV LGTNRIN----LTKTVRKYFI--  
S.moellendorffiiPDI-C 56 TNVVVDRSRDGEYLRIQFNMSFPALSC EFASVDVSDALGTNRYN----LTKTVRKYFI--  
C.subellipsoideaPDI-C 57 EELIVDRSAHGDLLRINFNISFPALSC EFATLDVSDALGTRMNM----LTKTIKRLPI--  
C.reinhardtiiPDI-C 57 SQLVVDRSPQNEELKINFNISFPALSC EFATVDVSDSLGTRMNM----LTKTVRKVPIITL  
V.carteriPDI-C 57 TQLIVDRSPQNEELKINFNISFPALSC EFATVDVSDTLGTRMNM----LTKTVRKMPITT  
C.reinhardtiiERV-A 59 HELSVDVGR-GEKLIHFDVTFPKVPCAWLSLDAMDISGELHLD----LDEDVYKORL--  
V.carteriERV-A 61 HELSVDVGR-GEKLIHFDLTFPKVPCSWLSLDAMDISGELHLD----LDEDVYKORL--  
C.subellipsoideaERV-A 57 NELSVDVTR-GDQLSINFDMTFPALPC EWLISLDLMDISGEMHLD----VDEDVYKORL--  
O.sativaERV-A3 57 TKLVVDTSR-GERLRVNFVDTFFPCTLLSVDTMDISGEQHHD----IREDIEKRL--  
Z.maysERV-A2 57 TKLVVDTSR-GERLRVNFDTFFLSHPC TLLSVDTMDISGEQHHD----IREDIEKRL--  
Z.maysERV-A3 57 TKLVVDTSR-GERLRVNFDTFFSPHPC TLLSVDTMDISGEQHHD----IREDIEKRL--  
S.moellendorffiiERV-A 56 SELLVVDTSR-GETLQINFDITFPALACSVVSLDAMDVSGEQHLD----VKENIFKRL--  
P.patensERV-A1 58 NDLVVDTER-GGTQINLNDVTFPALACSVVSLDAMDISGEAHL----VKENIFKRL--  
P.patensERV-A4 56 NQLVVDTSR-GETLQINLDTFFPALACSVVSLDAMDISGEQHLD----VRENIFKRL--  
P.patensERV-A2 56 NQLVVDTSR-GETLQINLDTFFPALACSMVSLDAMDISGEQHLD----VRENIFKRL--  
P.patensERV-A3 56 NQLVVDTSR-GETLQINLDTFFPALACSVVSLDAMDISGELHLD----VRENIFKRL--  
O.sativaERV-A2 56 SKLVVDTSR-GERLRVNFVDTFFPALPCSLVAVDTMDVSGEQHYD----IREDIEKRL--  
P.trichocarpaERV-A3 57 TKLVVDVTR-GQTLRINFDITFPALRC SLISVDAMDISGEQHHD----IREDIEKRL--  
P.trichocarpaERV-A4 57 TKLVVDTSR-GQSLRINFDVTFPALRC SLISVDAMDISGEQHLD----IREDIEKRL--  
A.thalianaERV-A2 57 TQLRVVDTSR-GEKLRINFDVTFPALCCSIIISLDSMDISGERHLD----VREDIEKRL--  
O.sativaERV-A1 57 TTLRVVDTSR-GETLRINFDVTFPALCCSIIISLDMAMDISGEQHLD----VREDIEKORI--  
Z.maysERV-A1 57 TTLRVVDTSR-GETLRINFDVTFPALCCSIIISLDMAMDISGEQHLD----VREDIEKORI--  
A.thalianaERV-A1 57 TKLVVDTSR-GETLRINFDITFPALACSIISVDAMDISGELHLD----VREDIEKRL--  
P.trichocarpaERV-A1 57 TKLVVDTSR-GETLRINFDVTFPALPCSIISLDMAMDISGEQHLD----VREDIEKRL--  
P.trichocarpaERV-A2 57 TKLVVDTSR-GETLRINFDVTFPALPCSIISLDMAMDISGEQHLD----VREDIEKRL--  
C.reinhardtiiERV-B 56 TVLSVDLAR-RHALTINLDTFFPSVPCAVLSIDVLDISGTAENDASFAHMRVHKMRL--  
V.carteriERV-B 54 HQMSVDLAR-RNALTINLDTFFPALPCAVLSIDVLDIAGTAENDASYAHMHMTHKRL--  
C.subellipsoideaERV-B 55 QTMSVDTSR-AHYLRMNFNTYFSPMPCQVLSLDATDMSGEKSGDSGHAANGEIHKVRL--  
P.patensERV-B 58 HEMSVDVGR-GEKLEPIHINMTFPALPC EVLISLDATDMSGKHEVD----LDTNIWKRL--  
S.moellendorffiiERV-B 54 HQMSVDVTR-GQNLPIHINMTFFPSHPC QILISVDATDMSGKHEVD----LDTNIWKRL--  
O.sativaERV-B 56 HQMSVDLKR-GETLEPIHINMSFPSPHPC EVLISVDATDMSGKHEVD----LHTNIWKRL--  
Z.maysERV-B 56 HQMSVDLKR-GETLEPIHINMSFPSPHPC EVLISVDATDMSGKHEVD----LHTNIWKRL--  
A.thalianaERV-B 56 HQMSVDLKR-GETLEPIHVNTFFPSHPC DVLSVDATDMSGKHEVD----LDTNIWKRL--  
P.trichocarpaERV-B1 56 HQMSVDLKR-GETLEPIHINMTFFPSHPC DVLSVDATDMSGKHEVD----LDTSIWKRL--  
P.trichocarpaERV-B2 56 HQMSVDLQR-GEILEPIHVNTFFPSHPC DVLSVDATDMSGKHEVD----LDTNIWKRL--

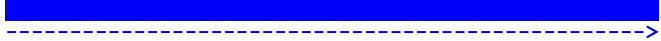

|                       |     |                                                                |
|-----------------------|-----|----------------------------------------------------------------|
| O.sativaPDI-C         | 110 | --DRNLVPTG-SEFHPGPIPTVSKHGDDVEEN-----HDDGSVPLSSRNFDYSYSHQYPVL  |
| Z.maysPDI-C           | 110 | --DRNLVPTG-SEFHPGPIPILNKHGDDVEED-----HVDGAFSLSSRNFDSSFHSHQYPVL |
| A.thalianaPDI13       | 110 | --DPLRATA-EEFHSSTDLHLINHGDEDHGD-----NSTYADIPLTGAAFEKFTTHHFQIL  |
| A.thalianaPDI12       | 110 | --DPLRSTG-AEFHSGIALHNNINHGEEETKEE-----FPDGAIPLTSASFALSHHFPIIL  |
| A.thalianaPDI7        | 110 | --DSNMRPTG-SEFHAGEVLSLINHGDETGEE-----IVEDSVPLTGRNFDFTTHQFPIL   |
| P.trichocarpaPDI-C1   | 110 | --DHDLKPTG-SEFHS GPVLHQIKHGDEVDEE-----GGEGSVSLKAHNFDQYSHQYPIL  |
| P.trichocarpaPDI-C2   | 110 | --DHDLKPTG-SEFHS GPVLHHLINHGDEVHEE-----GSEGSVSLKAHNFDQYTHQYPIL |
| P.patensPDI-C         | 110 | --DPLLQRIG-QEFHAGSVPNIKSHGDEEDVGEDMFEHLGEGAVELNKNTFDVYAQQFVSVL |
| S.moellendorffiiPDI-C | 110 | --DPNLKIVG-PEFHPGPIPNPNTSHGDDHEG-----EGAHVLTSSSTFDEYARRYSVL    |
| C.subellipsoideaPDI-C | 111 | --DEDQRAG-YYVHDDISNVDIKYDEPSVSQ-----DFALPLSKDSFKATLEAYSIV      |
| C.reinhardtiiPDI-C    | 113 | DMERQGAAYEDTAHKVGPKYDAEGHFDEEPDI-----DITVPLSHENFEATLARYPIA     |
| V.carteriPDI-C        | 113 | ELERMGSAYEDSSHKPGPKYDEEGRFDDEPDI-----DITVPLSHVNFEATLARYPIV     |
| C.reinhardtiiERV-A    | 112 | --NANGSPVK-EVEKHNVDATKKKP-----                                 |
| V.carteriERV-A        | 114 | --SANGSPVK-EVEKHNVEA-----                                      |
| C.subellipsoideaERV-A | 110 | --DSNGVVP-DSIEKHVQV-----                                       |
| O.sativaERV-A3        | 110 | --DAHGNVIE--ARKEGIGG-----                                      |
| Z.maysERV-A2          | 110 | --DAHGNVIE--ARKVSIIGG-----                                     |
| Z.maysERV-A3          | 110 | --NSHGNVIE--ARKEGIGG-----                                      |
| S.moellendorffiiERV-A | 109 | --DPSGKVVQ-PPVQEDIGG-----                                      |
| P.patensERV-A1        | 111 | --DVNGKVIIE-PARQESINQ-----                                     |
| P.patensERV-A4        | 109 | --DVHGKAVD-APKPDAINA-----                                      |
| P.patensERV-A2        | 109 | --DVHGKVVN-APKPDAINA-----                                      |
| P.patensERV-A3        | 109 | --DVHGKAVD-APKPDAINA-----                                      |
| O.sativaERV-A2        | 109 | --DNLGNVIE--SRKDGVGA-----                                      |
| P.trichocarpaERV-A3   | 110 | --NAHGDVIE--VRQDGIGA-----                                      |
| P.trichocarpaERV-A4   | 110 | --NAHGDVIE--VRQDGIGA-----                                      |
| A.thalianaERV-A2      | 110 | --DSSGNVIE--AKQDGIGH-----                                      |
| O.sativaERV-A1        | 110 | --DVHGNVIA--TKQDAVGG-----                                      |
| Z.maysERV-A1          | 110 | --DAHGNVIA--TRQDVVGG-----                                      |
| A.thalianaERV-A1      | 110 | --DSNGNTIE--ARQDGIGA-----                                      |
| P.trichocarpaERV-A1   | 110 | --DFHGNVIE--ARQDGIGA-----                                      |
| P.trichocarpaERV-A2   | 110 | --DSHGNVIE--SRQDGIGA-----                                      |
| C.reinhardtiiERV-B    | 113 | --DKAGNQLGKAEYHT-----                                          |
| V.carteriERV-B        | 111 | --DGAGKPLGKAEYHT-----                                          |
| C.subellipsoideaERV-B | 112 | --NEAGEKGLGEYIP-----                                           |
| P.patensERV-B         | 111 | --HRDGYVIG-SEFVNDLVE-----                                      |
| S.moellendorffiiERV-B | 107 | --HKDGHILG-SEYLSDLVE-----                                      |
| O.sativaERV-B         | 109 | --DKYGHILG-TEYLSDLVEK-----                                     |
| Z.maysERV-B           | 109 | --DKYGHILG-TEYLSDLVEK-----                                     |
| A.thalianaERV-B       | 109 | --NSHGHILG-TEYISDLVEKGEHGH-----                                |
| P.trichocarpaERV-B1   | 109 | --NSYGHITG-TEYLSDLVE-----                                      |
| P.trichocarpaERV-B2   | 109 | --NSHGHITG-TEYLSDLVE-----                                      |

|                       |     |                                                                 |
|-----------------------|-----|-----------------------------------------------------------------|
| O.sativaPDI-C         | 162 | VVNFYAPWCYWSNRLKPSWEKTAKIMRERYDPEMDGRILLAKVDCTEEIDLCRRHHIQGY    |
| Z.maysPDI-C           | 162 | VVNFYAPWCYWSNRLKPSWEKTAKIMRERYDPEMDGRILLGKVDCTEEVELCRRNHIQGY    |
| A.thalianaPDI13       | 163 | VVNFYAPWCYWSNRLKPSWVKASQITRERYNPGTDRLVLLGSVDCTEEPTLCKSNHIQGY    |
| A.thalianaPDI12       | 162 | VVNFNAPWCYWSNRLKPSWEKAANI IKQRYDPEADGRVLLGNVDCTEEPALCKRNHIQGY   |
| A.thalianaPDI7        | 162 | VVNFYAPWCYWCNLLKPSWEKAAQIKERYDPEMDGRVILLAKVDCQEGDLCRRNHIQGY     |
| P.trichocarpaPDI-C1   | 162 | VVNFYAPWCYWSNRLKPSWEKAAKI IRERYDPEMDGRILLAKVDCTEEGDLCRRNHIQGY   |
| P.trichocarpaPDI-C2   | 162 | VVNFYAPWCYWSNRLKPSWEKAAKI IRERYDPEIDGRILLAKVDCTEEGDLCRRNHIQGY   |
| P.patensPDI-C         | 167 | VVNFYAPWCPWSNKLKASWEKAAKI IADKYNPEMDGRILLAKVDCVVNVELCRSHHIQGY   |
| S.moellendorffiiPDI-C | 160 | VVNFYAPWC IWSARLKPSWDKAAGI IAEKYH PDT-GRILLGKVDCTDNNDLCKRHHIQGF |
| C.subellipsoideaPDI-C | 161 | VVNFYAPWCPWCQRLEPTWEAVTQEVHTKY-PDADGRIRFAKVDCTEVDLCREHQITGF     |
| C.reinhardtiiPDI-C    | 166 | VINFYAPWCHWCQRLEPTWEAATKEVHDKY-PEWDGRVRFKVDCTAEVDLCRQHFIQGF     |
| V.carteriPDI-C        | 166 | VVNFYAPWCHWCQRLEPTWEAATKEVHDKY-PEWDGRIRFAKVDCTQEMELCRTHFIQGF    |
| C.reinhardtiiERV-A    | 134 | -----PSAVNATASAAAGGAPAGGAAGAAGAEGG                              |
| V.carteriERV-A        | 131 | -----TKKVVP-----                                                |
| C.subellipsoideaERV-A | 127 | -----PELDTLL-----                                               |
| O.sativaERV-A3        | 126 | -----AKIESPLQ-----                                              |
| Z.maysERV-A2          | 126 | -----AKIERPLQ-----                                              |
| Z.maysERV-A3          | 126 | -----AKVERPLQ-----                                              |
| S.moellendorffiiERV-A | 126 | -----PKIDKPLQ-----                                              |
| P.patensERV-A1        | 128 | -----PKLIDKPLQ-----                                             |
| P.patensERV-A4        | 126 | -----PKVQRPLQ-----                                              |
| P.patensERV-A2        | 126 | -----PKVQKPLQ-----                                              |
| P.patensERV-A3        | 126 | -----PKVQKPLQ-----                                              |
| O.sativaERV-A2        | 125 | -----PKIERPLQ-----                                              |
| P.trichocarpaERV-A3   | 126 | -----PKIDKPLQ-----                                              |
| P.trichocarpaERV-A4   | 126 | -----PKIDRPLQ-----                                              |
| A.thalianaERV-A2      | 126 | -----TKIEKPLQ-----                                              |
| O.sativaERV-A1        | 126 | -----MKVEQPLQ-----                                              |
| Z.maysERV-A1          | 126 | -----MKMEAPLQ-----                                              |
| A.thalianaERV-A1      | 126 | -----TKIENPLQ-----                                              |
| P.trichocarpaERV-A1   | 126 | -----PKIEKPLQ-----                                              |
| P.trichocarpaERV-A2   | 126 | -----PKIEKPLQ-----                                              |
| C.reinhardtiiERV-B    | 127 | -----PQSQQIMD-----                                              |
| V.carteriERV-B        | 125 | -----PQSQQIMD-----                                              |
| C.subellipsoideaERV-B | 126 | -----PR-----                                                    |
| P.patensERV-B         | 128 | -----                                                           |
| S.moellendorffiiERV-B | 124 | -----                                                           |
| O.sativaERV-B         | 127 | -----                                                           |
| Z.maysERV-B           | 127 | -----                                                           |
| A.thalianaERV-B       | 134 | -----PH-----                                                    |
| P.trichocarpaERV-B1   | 126 | -----KEHE-----                                                  |
| P.trichocarpaERV-B2   | 126 | -----KEHE-----                                                  |

|                       |     |                                                               |
|-----------------------|-----|---------------------------------------------------------------|
| O.sativaPDI-C         | 222 | PSIRIFRKG--SDIKENQGHHDHESYYGDRDTESLVAAMETTYVANIPKDAHVLALEDKSN |
| Z.maysPDI-C           | 222 | PSIRVFRKG--SDIKENQGHHDHESYYGERDTESLVAAMETTYVANIPKEAH--ALEDKSN |
| A.thalianaPDI13       | 223 | PSIRIFRRG--SGLREDHGNHEHESYYGDRDTESLVKMVEELLKPIKKEDEKHALDGGKSD |
| A.thalianaPDI12       | 222 | PSIRIFRKG--SDLREDHGHHEHESYYGDRDTESLVKMVEELVAPIHPETHKVALDGGKSD |
| A.thalianaPDI7        | 222 | PSIRIFRKG--SDLKDDNAHHDHESYYGDRDTESLVKMVSLLVPEIHLPHNLALEDKSD   |
| P.trichocarpaPDI-C1   | 222 | PSIRIFRKG--SNLREDHGRHDHESYYGDRDTESLVKTMEALVAPIAMESQRQALEHKPE  |
| P.trichocarpaPDI-C2   | 222 | PSIRIFRKG--SDLRDDHGHHDHESYYGDRDTESLVKTMEALVAPIAMESQRHALEHKPE  |
| P.patensPDI-C         | 227 | PSIRIFRKG--HDLRDEHGRHDHESYYGERDTESLVAFMVELVPPATVDC--KFQLEDKSS |
| S.moellendorffiiPDI-C | 219 | PSIRIFRKG--HDLKDEHGHHEHDSYYGERDTESLVKAMEALVPEKETT----LALEDKT- |
| C.subellipsoideaPDI-C | 220 | PSIRVFRSG--HDEVNVHGVKEHESYRGDRTOASLLAFADNAPSAGQPHHYIRGVTRM-   |
| C.reinhardtiiPDI-C    | 225 | PSIRVFRKG--HDDIYIGGMHEHEAYMGDRTKDALVAFADSLVPSAGQPHRKLAGLSAA-  |
| V.carteriPDI-C        | 225 | PSIRVFRKG--HDDIVIGGMHEHESYMGDRTKDALVAFADSLVPSAGQPHRKHAAALSAA- |
| C.reinhardtiiERV-A    | 163 | AAGG--AGG--GENATALANGCGSCYGAEDKQGDCNCTCEVRAAYRKKWALSNVDHIE    |
| V.carteriERV-A        | 137 | -----VNC--TENSTATPV-CGSCYGAEDRQGDCCNCTCEVRAAYRKKWALANVDHIE    |
| C.subellipsoideaERV-A | 135 | -----HKA-----NETE-CGSCYGA-APDECCNCTCEVRAAYRKKWGFDPQGIS        |
| O.sativaERV-A3        | 134 | -----KHG--GRLSKGEFY-CGTCYGAESDEQCCNSCEVREAYRKKWALTNPLDID      |
| Z.maysERV-A2          | 134 | -----KHG--GRLDKGEQY-CGTCYGAESDEQCCNSCEVREAYRKKWALTNPLDID      |
| Z.maysERV-A3          | 134 | -----KHG--GRLDKGEQY-CGTCYGAESDEQCCNSCEVREAYRKKWALTNPLDID      |
| S.moellendorffiiERV-A | 134 | -----KHG--GRLEHNETY-CGSCYGAESDDECCNSCEVREAYRKKWALTNPLDID      |
| P.patensERV-A1        | 136 | -----KHG--GRLEHNETY-CGSCYGAETEDHCCNCTCEVREAYRKKWALNNPLDID     |
| P.patensERV-A4        | 134 | -----KHG--GRLEHNETY-CGSCYGAASSDDECCNSCEVREAYRKKWALINIDIID     |
| P.patensERV-A2        | 134 | -----KHG--GRLEHNETY-CGSCYGAESSDDECCNCTCEVREAYRKKWALTNPLDID    |
| P.patensERV-A3        | 134 | -----KHG--GRLEHNETY-CGSCYGAESSDDCCNSCEVREAYRKKWALTNPLDID      |
| O.sativaERV-A2        | 133 | -----KHG--GRLDHNEVY-CGSCYGSSESDDCCNSCEVREAYRKKWALTNIEEID      |
| P.trichocarpaERV-A3   | 134 | -----KHG--GRLEHNEEY-CGSCYGAEMSDDHCCNSCEVREAYRKKWALTNMLDID     |
| P.trichocarpaERV-A4   | 134 | -----SHG--GRLEHNEEY-CGSCYGGEMSHDDCCNCTCEVREAYRKKWAMTNMLDID    |
| A.thalianaERV-A2      | 134 | -----KHG--GRLEHNETY-CGSCYGAASDDACCNSCEVREAYRKKWALSDESID       |
| O.sativaERV-A1        | 134 | -----RHG--GRLEHNETY-CGSCYGAESDEQCCNSCEVREAYRKKWGVSNPLDID      |
| Z.maysERV-A1          | 134 | -----HHG--GRLEHNETY-CGSCYGAQESDDQCCNCTCEVREAYRKKWGVSNPLLD     |
| A.thalianaERV-A1      | 134 | -----KHG--GRLEHNETY-CGSCYGAEEHDCNSCEVREAYRKKWGVVTPNPLDID      |
| P.trichocarpaERV-A1   | 134 | -----RHG--GRLEHNETY-CGSCYGAASDEDCNSCEVREAYRKKWAVTPNPLMD       |
| P.trichocarpaERV-A2   | 134 | -----RHG--GRLEHNETY-C-----DEDCNSCEVREAYRKKWAVTPNPLMD          |
| C.reinhardtiiERV-B    | 135 | -----TGGEQLVSVNIQEAMQHLVDMEEA-----                            |
| V.carteriERV-B        | 133 | -----TGAEQLVSVNIQEAMQHLVDMEEA-----                            |
| C.subellipsoideaERV-B | 128 | -----RWC--FMCKPRQE-----VMEVNOAM-----                          |
| P.patensERV-B         | 128 | -----GE--HRKEEPKADKKDEHKDGDHRKKDPQKVINLVKKAII-----            |
| S.moellendorffiiERV-B | 124 | -----KEH--AHDN-LTGT--HSHEELRSVAVKVVNEINKAL-----               |
| O.sativaERV-B         | 127 | -----EHG--THNHDHDEHEDEQKKQEHFTNEAEKMKVSVKQAM-----             |
| Z.maysERV-B           | 127 | -----GHCAHHDHEDDHDHDEQKKHEQTFNEAEKMIKSVKQAL-----              |
| A.thalianaERV-B       | 136 | -----KHD--GKEEHNKNET-ETEALNILGFDQAAETMIKKVQKQAL-----          |
| P.trichocarpaERV-B1   | 130 | -----AHN--HDHDKDHHEDSHAKQHTHGFDAAETMVKKVQKQAL-----            |
| P.trichocarpaERV-B2   | 130 | -----AHN--HDHDKDHHKDSHEEQHTHGFDAAETMIKKVQKQAL-----            |

BLOCK#3----->

O.sativaPDI-C 280 KT-VPAKRPA--PLTSGGCRTEGFRVVKVFGSVVISARSGSH-----SFDPSQI  
Z.maysPDI-C 278 KT-VPAKRPA--PMASGGCRTEGFRVVKVFGSVVISARSGSH-----SFDPSQI  
A.thalianaPDI13 281 NA-ASTFKKA---PVSGGCRTEGYVRAKKVFGELVISAHSGAH-----SFDASQM  
A.thalianaPDI12 279 ---NITVKHLKKGPVTGGCRVEGYVRVKKVFGNLVISAHSGAH-----SFDSSQM  
A.thalianaPDI7 280 NSSR----TLKKAPSTGGCRVEGYVRVKKVFGNLMVSARSGSH-----SFDSSQM  
P.trichocarpaPDI-C1 280 NA-TQHVKRPA--PSAGGCRTEGYVRVKKVFGNLMISALSGAH-----SFDKQM  
P.trichocarpaPDI-C2 280 NA-TQHVKRPA--PSAGGCRTEGYVRVKKVFGNLMISAHSGAH-----SFDASQM  
P.patensPDI-C 284 ITVNATIKRPA--PKAGGCRVEGFRVVKVFGELMISAHSGSH-----SFDATSM  
S.moellendorffiiPDI-C 272 ---NGTVKRPA--PRAGGCRTEGFRVRAKKVFGNIIISAHSGSH-----SFDASAM  
C.subellipsoideaPDI-C 277 -----AKTSGCALSGFVLVKKVFGALHFLAKSPGH-----SFDYQAM  
C.reinhardtiiPDI-C 282 -----PKTPGCNLAGFVMVKKVFGTVHFFVARSEGH-----SFDHTWM  
V.carteriPDI-C 282 -----PKTPGCNLAGFVMVKKVFGTLTVVARSEGH-----SFDHTWM  
C.reinhardtiiERV-A 219 QCAHDLYTEAIKEAQEGECRMWGMLEVNKVAGNFHFAPGRSYQQGSMHVHDIAPFGDAVI  
V.carteriERV-A 188 QCAHDLYTESIKEQTGEGCHMWGMLEVNKVAGNFHFAPGRSYQQGSMHVHDIAPFGDAVI  
C.subellipsoideaERV-A 180 QCAHDLGFVEKLRQEGEGCRMWGSLEVNKVAGNFHFAPGKSFQQGPMHVHDIAPFGVTF  
O.sativaERV-A3 185 QCTREDFVERVKTOQEGECNVHGFLLDVSQVAGNFHFAPGKGFYESNIDVPEL-SALEHGF  
Z.maysERV-A2 185 QCARDFVVERVKTOQEGECNVHGFLLDVSQVAGNFHFAPGKGFYESNIDVPEL-SLLEGGF  
Z.maysERV-A3 185 QCARDFVVERVKTOQEGECNVHGFLLDVSQVAGNFHFAPGKGFYESNIDVPEL-SLLEGGF  
S.moellendorffiiERV-A 185 QCKREGWLTKIKEEGEGECNLYGSLLEVNKVAGNFHFAPGKSFQQGPMHVHDIAPFGVTF  
P.patensERV-A1 187 QCKREGFLQIKDEEGEGECNLYGSLLEVNKVAGNFHFAPGKSFQQANMHVHDIAPFGKDSF  
P.patensERV-A4 185 QCHREGFIERVKEEGEGECNLYGSLLEVNKVAGNFHFAPGKSFQQSAMHLLDLGIRSDSF  
P.patensERV-A2 185 QCHREGFIERVKEEGEGECNLYGSLLEVNKVAGNFHFAPGKSFQQSAMHLLDLGIRSDSF  
P.patensERV-A3 185 QCHREGFIERVKEEGEGECNLYGSLLEVNKVAGNFHFAPGKSFQQSAMHLLDLGIRSDSF  
O.sativaERV-A2 184 QCKREGFVQRLKDEEGEGECNLYGSLLEVNKVAGNFHFAPGKSLDQSFNFDLLEQQENY  
P.trichocarpaERV-A3 185 QCIREFGVQMIKDEEGEGECNLYGSLLEVNKVAGNFHFVPGKSFHQSNFQLLDLDMQKESY  
P.trichocarpaERV-A4 185 QCKREGFIQMIKDEEGEGECNLYGSLLEVNKVAGNFHFAPGKSFHLSNFDLQDLQKDSY  
A.thalianaERV-A2 185 QCKREGFVQVKDEEGEGECNLYGSLLEVNKVAGNFHFIPGQSFHQSGFQFHDMLLQOQGNY  
O.sativaERV-A1 185 QCKREGFLQSIKDEEGEGECNLYGSLLEVNKVAGNFHFAPGKSFQKANVHVHDLLEFQKDSF  
Z.maysERV-A1 185 QCKREGFLQSIKDEEGEGECNLYGSLLEVNKVAGNFHFAPGKSFQQSNVHVHDLLEFQKDSF  
A.thalianaERV-A1 185 QCKREGFLQRVKDEEGEGECNLYGSLLEVNKVAGNFHFAPGKSFHQSGVHVHDLLEFQKDSF  
P.trichocarpaERV-A1 185 QCKREGFLQIKDEEGEGECNLYGSLLEVNKVAGNFHFAPGKSFQQSGVHVHDLLEFQKDSF  
P.trichocarpaERV-A2 176 QCKREGFLQIKDEEGEGECNLYGSLLEVNKVAGNFHFAPGKSFQQSGVHVHDLLEFQKDSF  
C.reinhardtiiERV-B 160 -----DHHEGCHVYGTMDVVKRVAGRLHFSVHQNMVFQMLPQLLGTTHHIPKIL  
V.carteriERV-B 158 -----EHHEGCHVYGTMDVVKRVAGRLHFSVHQNMVFQMLPQLLGAHRIPKVA  
C.subellipsoideaERV-B 148 -----DAHEGCHVYGTMDVVKRVAGRLHFSVHQNMVFQMLPQLLGTTHHIPKIL  
P.patensERV-B 165 -----DDGEGCQIFGVLDERVAGNFHIS---MHGLSLYVAEKIFEAGYEV  
S.moellendorffiiERV-B 156 -----QDGECCRVFGVLDVERVAGNFHIS---MHGMSLQVAVQIFHVSVEV  
O.sativaERV-B 166 -----ENGECCRVYGVLDVQVRVAGNFHIS---VHGLNIFVAEKIFDGSSHV  
Z.maysERV-B 167 -----GNGECCRVYGMLDVQVRVAGNFHIS---VHGLNIFVAEKIFEGSNHV  
A.thalianaERV-B 173 -----ADGECCRVYGVLDVQVRVAGNFHIS---VHGLNIFVAQMFIFGGSKNV  
P.trichocarpaERV-B1 168 -----ANGECCRVYGVLDVQVRVAGNFHIS---VHGLNIFVAQMFIFDGAHKV  
P.trichocarpaERV-B2 168 -----ANGECCRVYGVLDVQVRVAGNFHIS---VHGLNIFVAQMFIFDGAHKV

COPII-coated Erv (consensus)-----

BLOCK#4---->

|                       |     |                                                   |            |       |            |             |
|-----------------------|-----|---------------------------------------------------|------------|-------|------------|-------------|
| O.sativaPDI-C         | 327 | NVSHYVVTQFSFGKRLSAKMFNELKRLTPYVGGHHD----          | RLAQ       | ---   | SYI        | VKHGDVNVANV |
| Z.maysPDI-C           | 325 | NVSHYVVTQFSFGKRLSPRMLHEFIRLTPYLRGYHD----          | RLAQ       | ---   | SYI        | VKHGEVNVANV |
| A.thalianaPDI13       | 327 | NMSHIVTHTLTFGTMTVSERLWTDKRLLPYLGQSYD----          | RLNGK      | ---   | SF         | TNERQLDANV  |
| A.thalianaPDI12       | 326 | NMSHWVSHFSFGRMISPRLLTDMKRLLPYLGLSHD----           | RLDGK      | ---   | AF         | TNQHEFGANV  |
| A.thalianaPDI7        | 326 | NMSHWVNHLSFGRRIMPQKFSEFKRLSPYLGLSHD----           | RLDGR      | ---   | SF         | TNQRDLGPNV  |
| P.trichocarpaPDI-C1   | 327 | NLSHWVISHFSFGMKVLPVMSDVKRLLPYIGRSHD----           | KLNGR      | ---   | SF         | TNHRDVGANV  |
| P.trichocarpaPDI-C2   | 327 | NLSHWVISHFSFGMKVLPVMSDVKRLIPHIGRSHD----           | KLNGR      | ---   | SF         | TNHRDVGANV  |
| P.patensPDI-C         | 322 | NMTHYVGGFSFGKRKTSWRSVHVVNEMLPALDSNID----          | RLTGO      | ---   | VF         | PSEYEN---I  |
| S.moellendorffiiPDI-C | 317 | NMTHYVVSQFTFGRELNFWMRRELYRIYPHLASVYDTVEANLTGR---  | IY         | ---   | VSQHEN     | ---I        |
| C.subellipsoideaPDI-C | 314 | NMSHWVNYLVFGNKPSPRRQSLAKLHP--AGLSDDWADKLAGQ---    | DF         | ---   | FSRAAK     | ---A        |
| C.reinhardtiiPDI-C    | 319 | NMTHMTHSHFHVGTTRPSPRKYQQLKRLHP--AGLTADWADKLHDQ--- | LF         | ---   | VSEHTQ     | ---S        |
| V.carteriPDI-C        | 319 | NMTHLVHTFHVGTTRPSPRKYQQLKRLHP--AGLTHDWADQLRDQ---  | FF         | ---   | USEHPQ     | ---S        |
| O.sativaERV-A         | 279 | DFRHTVTHKLSFG-----EPVPGMKN----                    | PLDGAKAGQA | ----- | AAAAAA     | -ATG        |
| V.carteriERV-A        | 248 | DFRHTVTHKLSFG-----APVPGMKN----                    | PLDNA      | ---   | K          | -AGYKSAAATG |
| C.subellipsoideaERV-A | 240 | DLSHRIDKLSFG-----HEVPGMTN----                     | PLDRVNLPKF | ---   | NTRNPQGLPG |             |
| O.sativaERV-A3        | 244 | NITSHKINKLSFG-----TEFPGVVN----                    | PLDGA      | ---   | QW         | -TQPASD---G |
| Z.maysERV-A2          | 244 | NITSHKINKLSFG-----TEFPGVVN----                    | PLDGA      | ---   | QW         | -TQPASD---G |
| Z.maysERV-A3          | 244 | NITSHKINKLSFG-----TEFPGVVN----                    | PLDGA      | ---   | QW         | -TQPASD---G |
| S.moellendorffiiERV-A | 245 | NVSHYINELLSFG-----ARVPGVVN----                    | PLDKE      | ---   | KR         | -TQKFPS---A |
| P.patensERV-A1        | 247 | NVSHKINELLSFG-----VRVPGAVN----                    | PLDKL      | ---   | ER         | -TQTTH---G  |
| P.patensERV-A4        | 245 | NVSHIVNELLSFG-----AHVPGRVN----                    | PLDKI      | ---   | TS         | -TQKDN---G  |
| P.patensERV-A2        | 245 | NVSHITINELLSFG-----AHVPGAVN----                   | PLDKV      | ---   | TN         | -TQKDLN---G |
| P.patensERV-A3        | 245 | NVSHITINELLSFG-----AYVPGAVN----                   | PLDKV      | ---   | TS         | -TQKDN---G  |
| O.sativaERV-A2        | 244 | NITSHKINKLSFG-----VEFPGVVN----                    | PLDGV      | ---   | EW         | -TQEHTNGLTG |
| P.trichocarpaERV-A3   | 245 | NITSHKINRLAFG-----DYVPGVVN----                    | PLDGI      | ---   | QL         | -MHETQN---G |
| P.trichocarpaERV-A4   | 245 | NITSHKINRLAFG-----DYVPGVVN----                    | PLAGI      | ---   | QL         | -MHDTPN---G |
| A.thalianaERV-A2      | 245 | NITSHKINRLAFG-----DFVPGVVN----                    | PLDGV      | ---   | QW         | -NOGKQS---G |
| O.sativaERV-A1        | 245 | NVSHKINKLSFG-----QVFPGVVN----                     | PLDGA      | ---   | QW         | -MQHSSY---G |
| Z.maysERV-A1          | 245 | NVSHKINRLSFG-----EYVPGVVN----                     | PLDGA      | ---   | NW         | -MQHSSY---G |
| A.thalianaERV-A1      | 245 | NITSHKINRLTYG-----DYVPGVVN----                    | PLDKV      | ---   | EW         | -SQDTPN---A |
| P.trichocarpaERV-A1   | 245 | NITSHKINRLTFG-----EYVPGVVN----                    | PLDGV      | ---   | QW         | -TQETPS---G |
| P.trichocarpaERV-A2   | 236 | NITSHKINRLAFG-----EYVPGVVN----                    | PLDGV      | ---   | QW         | -TQETPS---G |
| C.reinhardtiiERV-B    | 207 | NMSHWIKHLGFG-----PHVPGQLN----                     | PLDGY      | ---   | VR         | -MVGREP---F |
| V.carteriERV-B        | 205 | NISHTIKHLGFG-----PHVPGQLN----                     | PLDGY      | ---   | VR         | -MVKGPP---Q |
| C.subellipsoideaERV-B | 191 | NSSHIIHRSFG-----PTVPGQVN----                      | PLDGA      | ---   | ER         | -ILDKES---G |
| P.patensERV-B         | 208 | NVSHVIHDLISFG-----PTVPGHHN----                    | PLDGS      | ---   | ER         | -ILHDTA---G |
| S.moellendorffiiERV-B | 199 | NVSHIINDLSFG-----PKVPGIHN----                     | PLDRT      | ---   | VR         | -ILRDTA---G |
| O.sativaERV-B         | 209 | NVSHIINDLSFG-----PKVPGIHN----                     | PLDET      | ---   | TR         | -ILHDTA---G |
| Z.maysERV-B           | 210 | NVSHVIHDLISFG-----PKVPGIHN----                    | PLDET      | ---   | SR         | -ILHDTA---G |
| A.thalianaERV-B       | 216 | NVSHIINDLSFG-----PKVPGIHN----                     | PLDDT      | ---   | NR         | -ILHDTA---G |
| P.trichocarpaERV-B1   | 211 | NVSHIINDLSFG-----PKVPGIHN----                     | PLDGT      | ---   | TR         | -ILHETS---G |
| P.trichocarpaERV-B2   | 211 | NVSHIINDLSFG-----PKVPGIHN----                     | PLDGT      | ---   | AR         | -ILRETS---G |

## BLOCK#5-----

O.sativaPDI-C 380 TIEHYLQIVKTELVTLRSSKELKLVVEEYETAH----SSLVHSFYVPVVKHFFEFSPMQV  
 Z.maysPDI-C 378 TIEHYLQVVKTELVTRSSKELKLVLEEYETAH----SSLVHSFYVPVVKHFFEFSPMQV  
 A.thalianaPDI13 379 TIEHYLQIKTEVISRRSGQEHSLIEEYETAH----SSVARSYHYPEAKHFFELSPMQV  
 A.thalianaPDI12 378 TIEHYLQIVKTEVITRRSGQEHSLIEEYETAH----SSVAQTYYPVAKHFFELSPMQV  
 A.thalianaPDI7 378 TIEHYLQIVKTEVVKSNQQAIV---EAYETAH----SSVAHSYYPVAKHFFELSPMQV  
 P.trichocarpaPDI-C1 379 TIEHYLQVVKTEVTRRSSSERKLEIEEYETAH----SSLSQTVYMPVAKHFFELSPMQV  
 P.trichocarpaPDI-C2 379 TIEHYLQVVKTEVTRRSSAEHKLIEEYETAH----SSLAQTVYMPVAKHFFELSPMQV  
 P.patensPDI-C 381 THDHYLQVVKTEVITLRRQDLRVLEQYDYETAH----SNMIQSTKVPVVKHFFELSPMQV  
 S.moellendorffiiPDI-C 370 THDHYLQVVKTEVVSRLRKRKESLLEQYDYTSH----SNTIQNTNVPVAKHFFELSPMQV  
 C.subellipsoideaPDI-C 365 TFEHYMQVVLTTIEPSKHRPELSY-DAYEYTVH----SHTYDTADLPAAKFTYDLSPIQI  
 C.reinhardtiiPDI-C 370 THEHYLQVVLTTIEPRHSRHTGNY-DAYEYTAH----SHSYQSDSPSARFTYDLSPIQI  
 V.carteriPDI-C 370 THEHYLQIVLTSIEPRRSRHSNGY-DAYEYTAH----SHTYQSDALPSARFTYDLSPIQI  
 C.reinhardtiiERV-A 318 MFQYFLKVVPTSYYTDLNKTLLST--NQFSVTENFRE-AQQGAGRTLPGVFFFYDLSPIKV  
 V.carteriERV-A 284 MYQYFLKVVPTSYYTGLDNGKTLAT--NQFSVTENFRESSQGGAGKTLPGVFFFYDLSPIKV  
 C.subellipsoideaERV-A 280 AYQYFLKVVPTIYVNSHNHTINS--NQYSVTEHEK--GSQDFQAQLPGVFFFYDLSPIKV  
 O.sativaERV-A3 278 TYQYFLKVVPTIYTDLRGRKTHS--NQFSVTEHER--DGNIRPKPQPGVFFFYDLSPIKV  
 Z.maysERV-A2 278 TYQYFLKVVPTIYTDLRGRKTHS--NQFSVTEHER--DGNVVRPKPQPGVFFFYDLSPIKV  
 Z.maysERV-A3 278 TYQYFLKVVPTIYTDLRGRKTHS--NQFSVTEHER--DGNVVRPKPQPGVFFFYDLSPIKV  
 S.moellendorffiiERV-A 279 MYQYFLKVVPTAYTDMTGKHTVT--NQFSVTDHEKA-VEGLNGRSLPGVFFFYDLSPIKV  
 P.patensERV-A1 281 MYQYFLKVVPTIYTDLRGRKTHS--NQFAVTDHEKGVGPGEDHALPGVFFFYDLSPIKV  
 P.patensERV-A4 279 MYQYFLKVVPTVYTDLRGSEIAT--NQFSVTEHYT--AGDHGPRVLPVGVFFFYDLSPIKV  
 P.patensERV-A2 279 MYQYFLKVVPTVYTDIKGRKTHS--NQFSVTEHYT--AGDHGPRVLPVGVFFFYDLSPIKV  
 P.patensERV-A3 279 MFQYFLKVVPTVYTDIKGRKTHS--NQFSVTEHYT--AGDHGPRVLPVGVFFFYDLSPIKV  
 O.sativaERV-A2 281 MYQYFLKVVPTIYTDLRGRKTHS--NQFSVTEHER--EAIGYPRPBPVGVFFFYDLSPIKV  
 P.trichocarpaERV-A3 279 VQQYFLKVVPTIYTDLRGRTHS--NQYSVTEHEK-SELMRLDSLPGVFFFYDLSPIKV  
 P.trichocarpaERV-A4 279 VQQYFLKVVPTIYTDLRGRTHS--NQYSAVTEHEK-SELTPLDSLPGVFFFYDLSPIKV  
 A.thalianaERV-A2 279 VYQYFLKVVPSIYTDVHQNTIQS--NQFSVTEHEQN-MEAGRMQSPVGVFFFYDLSPIKV  
 O.sativaERV-A1 279 MYQYFLKVVPTIYTDINEHITLLS--NQFSVTEHERS-SESGRIQAVPGVFFFYDLSPIKV  
 Z.maysERV-A1 279 MYQYFLKVVPTVYTDINEHITLLS--NQFSVTEHERS-GESGRMQALPGVFFFYDLSPIKV  
 A.thalianaERV-A1 279 MYQYFLKVVPTVYTDLRGHTIQS--NQFSVTEHVKS-SEAGQLQSLPGVFFFYDLSPIKV  
 P.trichocarpaERV-A1 279 MYQYFLKVVPTVYTDVSGHTIQS--NQFSVTEHERG-TDIGRLQSLPGVFFFYDLSPIKV  
 P.trichocarpaERV-A2 270 MYQYFLKVVPTVYTDVSGHTIQS--NQFSVTEHERG-ADIGRLQSLPGVFFFYDLSPIKV  
 C.reinhardtiiERV-B 241 SYKYFLKVVPTIYVYVNRGLRATET--HOYSVTEY----AQPLQRGYAPAVDVHYDLSPIVM  
 V.carteriERV-B 239 SFKYFLKVVPTIYVYVNRGLRVTET--HOYSVTEY----TQPLEPGYVPTLDVHYDLSPIVM  
 C.subellipsoideaERV-B 225 TFKYFLKVVPTIYVYVNRGLRVTET--NQYSVTEYDT--VVHKGEMQMPVSVVFSYDLSPIV  
 P.patensERV-B 242 TFKYFLKIVPTIYVYVNRGLRVTET--NQFSVTEYVQ--RTKPSDRSYPVAVVYVYDLSPIV  
 S.moellendorffiiERV-B 233 TFKYFKIVPTIYVYVNRGLRVTET--NQFSVGEYVL--AARDDDISWPAVYVYVYDLSPIV  
 O.sativaERV-B 243 TFKYFKIVPTIYVYVNRGLRVTET--NQFSVTEYVQ--KRATDRSAWPAVYVYVYDLSPIV  
 Z.maysERV-B 244 TFKYFKIVPTIYVYVNRGLRVTET--NQFSVTEYVL--PIRPTDRAWPAVYVYVYDLSPIV  
 A.thalianaERV-B 250 TFKYFKIVPTIYVYVNRGLRVTET--NQYSVTEYVQ--PMTDFDRTWPAVYVYVYDLSPIV  
 P.trichocarpaERV-B1 245 TFKYFKIVPTIYVYVNRGLRVTET--NQFSVTEYVQ--PMTDFDRTWPAVYVYVYDLSPIV  
 P.trichocarpaERV-B2 245 IFKYFKIVPTIYVYVNRGLRVTET--NQFSVTEYVQ--PITDFDRTWPAVYVYVYDLSPIV



----->

|                       |     |            |            |            |            |           |           |            |         |          |     |
|-----------------------|-----|------------|------------|------------|------------|-----------|-----------|------------|---------|----------|-----|
| O.sativaPDI-C         | 436 | LVTELPKSF  | SHFITNVCAI | IGGVFTVAGI | LD         | SIFHNTLR  | LVK-KVEL  | GKNI-      |         |          |     |
| Z.maysPDI-C           | 434 | LVTEVPKSF  | SHFITNVCAI | IGGVFTVAGI | LD         | SIFHNTLR  | MVK-KIEL  | GKNI-      |         |          |     |
| A.thalianaPDI13       | 435 | LISENPKSF  | SHFITNVCAI | IGGVFTVAGI | LD         | SIFQNTVR  | MVK-KIEL  | GKNI-      |         |          |     |
| A.thalianaPDI12       | 434 | LITENPKSF  | SHFITNVCAI | IGGVFTVAGI | LD         | SIFHNTVRL | LVK-KVEL  | GKNI-      |         |          |     |
| A.thalianaPDI7        | 431 | LITENSKSF  | SHFITNVCAI | IGGVFTVAGI | LD         | SILHHSMTL | MK-KIEL   | GKNF-      |         |          |     |
| P.trichocarpaPDI-C1   | 435 | LITENSKSF  | SHFITNVCAI | IGGVFTVAGI | LD         | SILHHTVRR | MMK-KVEL  | GKNF-      |         |          |     |
| P.trichocarpaPDI-C2   | 435 | LITENPKSF  | SHFITNVCAI | IGGVFTVAGI | LD         | SILHNTFR  | MMK-KVEL  | GKNF-      |         |          |     |
| P.patensPDI-C         | 437 | LVKENPKSF  | SHFLTNLCAI | IGGVFTVAGI | LD         | SMLHNAMH  | IMK-KVEL  | GKQY-      |         |          |     |
| S.moellendorffiiPDI-C | 426 | LVKENPKSF  | SHFITNVCAI | IGGVFTVAGI | VD         | SMLHGAMR  | MVK-KIEL  | GKQF-      |         |          |     |
| C.subellipsoideaPDI-C | 420 | LVSEKRRAMY | HVTTTCAI   | IGGVFTVAGI | VD         | GLMHTGAR  | FAK-KVEL  | GKHT-      |         |          |     |
| C.reinhardtiiPDI-C    | 425 | LVHEITSKP  | FYQFLTTS   | CAI        | IGGVFTVAGI | LD        | DALLYQSFK | VVK-KLNL   | GKQG-   |          |     |
| V.carteriPDI-C        | 425 | LVQETAR    | FYQFLTTS   | CAI        | IGGVFTVAGI | LD        | DALLYQSFK | VVK-KLNL   | GKQG-   |          |     |
| C.reinhardtiiERV-A    | 375 | KIVTEHGSS  | FLSFLTNSV  | CAI        | IGGVFTVSGI | VD        | AFVYTGTR  | MVK-KKMMEL | GKFS-   |          |     |
| V.carteriERV-A        | 342 | RIVTEHSSS  | FLSFLTNSV  | CAI        | IGGVFTVSGI | VD        | AFVYTGTR  | MVK-KKMMEL | GKFS-   |          |     |
| C.subellipsoideaERV-A | 336 | KYHEITRMS  | FLHFLTNSV  | CAI        | IGGVFTVSGI | VD        | AFVYTGTR  | MVK-KKMMEL | GKFS-   |          |     |
| O.sativaERV-A3        | 334 | IFTEENSS   | LHLYLTNL   | CAI        | IGGVFTVSGI | LD        | SFIYHGQRA | TKKKMEL    | GKYR-   |          |     |
| Z.maysERV-A2          | 334 | IFTEENRS   | LHLYLTNL   | CAI        | IGGVFTVSGI | LD        | SFIYHGQRA | TKKKMEL    | GKYR-   |          |     |
| Z.maysERV-A3          | 334 | IFTEENRS   | LHLYLTNL   | CAI        | IGGVFTVSGI | LD        | SFIYHGQRA | TKKKMEL    | GKYR-   |          |     |
| S.moellendorffiiERV-A | 336 | LFTEERKTS  | FLHFLTNSV  | CAI        | IGGVFTVSGI | LD        | SFIYHGHR  | A          | TKKKMEL | GKFI-    |     |
| P.patensERV-A1        | 338 | KFTEERKMS  | FHFLTNVCAI | IGGVFTVSGI | LD         | DAFVYHGQ  | QTKKR--   | LGKDT-     |         |          |     |
| P.patensERV-A4        | 335 | KFTEERKPS  | FLHFLTNSV  | CAI        | IGGVFTVSGI | LD        | SFIYHGHR  | A          | TKKKMEL | GKFS-    |     |
| P.patensERV-A2        | 335 | KFTEERPS   | FLHFLTNSV  | CAI        | IGGVFTVSGI | LD        | SFIYHGHR  | A          | TKKKMEL | GKLS-    |     |
| P.patensERV-A3        | 335 | KFTEERPS   | FLHFLTNSV  | CAI        | IGGVFTVSGI | LD        | SFIYHGHR  | A          | TKKKMEL | GKLS-    |     |
| O.sativaERV-A2        | 337 | DFTEENTS   | LHFLTNLCAI | IGGVFTVAGI | LD         | SFVYHGHR  | A         | TKKKMEL    | GKLG-   |          |     |
| P.trichocarpaERV-A3   | 336 | TFKEEHTS   | FLHFLMTS   | ICAI       | IGGVFTVAGI | LD        | SFIYHGHR  | A          | TKKKMEL | GKFS-    |     |
| P.trichocarpaERV-A4   | 336 | IFKEEHS    | FLHFLMTS   | ICAI       | IGGVFTVAGI | LD        | SFIYHGHR  | A          | TKKKMEL | GKFG-    |     |
| A.thalianaERV-A2      | 336 | IFTEOHVE   | FLHFLTNSV  | CAI        | IGGVFTVSGI | LD        | SFIYHGQRA | TKKKMEL    | GKFN-   |          |     |
| O.sativaERV-A1        | 336 | TFTEOHV    | SFLHFLTNSV | CAI        | IGGVFTVSGI | LD        | SFVYHGQRA | TKKKMEL    | GKFN-   |          |     |
| Z.maysERV-A1          | 336 | TFTEOHV    | SFLHFLTNSV | CAI        | IGGVFTVSGI | LD        | SFVYHSQRA | TKKKMEL    | GKFN-   |          |     |
| A.thalianaERV-A1      | 336 | TFTEEHHS   | FLHFLTNSV  | CAI        | IGGVFTVSGI | LD        | DAFVYHGQ  | RA         | TKKKMEL | GKFS-    |     |
| P.trichocarpaERV-A1   | 336 | TFTEEHVS   | FLHFLTNSV  | CAI        | IGGVFTVSGI | LD        | DAFVYHGQ  | RA         | TKKKMEL | GKFS-    |     |
| P.trichocarpaERV-A2   | 327 | TFTEEHVS   | FLHFLTNSV  | CAI        | IGGVFTVSGI | LD        | DAFVYHGQ  | RA         | TKKKMEL | GKFS-    |     |
| C.reinhardtiiERV-B    | 295 | TINERPPS   | LHFVVR     | LCAVVG     | GF         | ATRLTDR   | WV        | DWLVRLV    | NKAA    | ARCP---  |     |
| V.carteriERV-B        | 293 | TINERPPS   | LHFVVR     | LCAVVG     | GF         | ATRLTDR   | WV        | DWLVRLV    | NK      | -----    |     |
| C.subellipsoideaERV-B | 281 | TISEIRKSF  | AHLLVRF    | CAVVG      | GF         | AVTGM     | DR        | WMSFI      | IDFV    | MSTSKQGF | --- |
| P.patensERV-B         | 298 | TIREHRRNF  | GHFITRL    | CAVVG      | GF         | AVTGM     | DR        | WMSFI      | IDFV    | MSTSKQGF | --- |
| S.moellendorffiiERV-B | 289 | LIKEERRS   | FCHLLTR    | CAVVG      | GF         | AVTGM     | DR        | WMSFI      | IDFV    | MSTSKQGF | --- |
| O.sativaERV-B         | 300 | TIKEERRNF  | LHFLTR     | CAVVG      | GF         | AVTGM     | DR        | WMSFI      | IDFV    | MSTSKQGF | --- |
| Z.maysERV-B           | 300 | TIKEERRNF  | LHFLTR     | CAVVG      | GF         | AVTGM     | DR        | WMSFI      | IDFV    | MSTSKQGF | --- |
| A.thalianaERV-B       | 306 | TIKEERRS   | FLHLITRL   | CAVVG      | GF         | AVTGM     | DR        | WMSFI      | IDFV    | MSTSKQGF | --- |
| P.trichocarpaERV-B1   | 301 | TIKEERRS   | FLHFITRL   | CAVVG      | GF         | AVTGM     | DR        | WMSFI      | IDFV    | MSTSKQGF | --- |
| P.trichocarpaERV-B2   | 301 | TIKEERRS   | FLHFITRL   | CAVVG      | GF         | AVTGM     | DR        | WMSFI      | IDFV    | MSTSKQGF | --- |

----->

Multiple sequence alignment for NJ and ML trees in Fig. 3

**BLOCK#1**-----

```

B.distachyonPDI-C      1  MISS-SKIKSVDFYRKIPRDLTEASLSGAGLSIVAALAMVFLFGMELSSYLAVNNTTTSVI
O.sativaPDI-C         1  MISS-SKIKSVDFYRKIPRDLTEASLSGAGLSIVAALAMVFLFGMELSSYLAVNNTTTSVI
E.salsugineumPDI-C1  1  MVSS-TKIKSVDFYRKIPRDLTEASLSGAGLSIVAALVMMFLFGMELSSYLEVSTTAVV
A.thalianaPDI12       1  MVSS-TKIKSVDFYRKIPRDLTEASLSGAGLSIVAALFMVFLFGMELSSYLEVNTTAVI
C.rubellaPDI-C1       1  MVSS-TKIKSVDFYRKIPRDLTEASLSGAGLSIVAALFMVFLFGMELSSYLEVNTTTSVI
E.salsugineumPDI-C3  1  MVST-TKIKSVDFYRKIPRDLTEASLSGAGLSIVAALAMVFLFGMELSSYLAVSTTTSVI
A.thalianaPDI13       1  MVST-SKIKSVDFYRKIPRDLTEASLSGAGLSIVAALAMVFLFGMELSSYLAVNTTTSVI
C.rubellaPDI-C3       1  MVST-TKIKSVDFYRKIPRDLTEASLSGAGLSIVAALAMVFLFGMELSSYLAVNNTTTSVI
E.salsugineumPDI-C2  1  MVST-SKIKSVDFYRKIPRDLTEASLSGAGLSIVAALSMLFLFGMELNNYLAVSTTTSII
A.thalianaPDI7        1  MVST-SKIKSVDFYRKIPRDLTEASLSGAGLSIVAALSMLFLFGMELNNYLAVSTTTSVI
C.rubellaPDI-C2       1  MVST-SKIKSVDFYRKIPRDLTEASLSGAGLSIVAALSMLFLFGMELNNYLAVSTTTSVI
S.lycopersicumPDI-C  1  MVST-SKIKSVDFYRKIPRDLTEASLSGAGLSIVAALCMVFLFGMELNNYLAVSTTTSVI
S.tuberosumPDI-C      1  MVST-SKIKSVDFYRKIPRDLTEASLSGAGLSIVAALSMMFLFGMELNNYLAVSTTTSVI
M.truncatulaPDI-C1    1  MTTA-SKIKSVDFYRKIPRDLTEASLSGAGLSIVAALAMVFLFGMELNNYLAVSTTTSVI
P.vulgarisPDI-C1      1  MISS-SKIKSVDFYRKIPRDLTEASLSGAGLSIVAALCMVFLFGMELNNYLSVSTTTSVI
G.maxPDI-C1           1  MISS-SKIKSVDFYRKIPRDLTEASLSGAGLSIVAALAMVFLFGMELNNYLSVSTTTSVI
G.maxPDI-C2           1  MISS-SKIKSVDFYRKIPRDLTEASLSGAGLSIVAALAMVFLFGMELNNYLSVSTTTSVI
M.truncatulaPDI-C2    1  MISA-SKIKSVDFYRKIPRDLTEASLSGAGLSIVAALAMVFLFGMELNNYLSVSTTTSVI
P.vulgarisPDI-C2      1  MISA-TKIKSVDFYRKIPRDLTEASLSGAGLSIVAALSMMFLFGMELNNYLSVSTTTSVI
G.maxPDI-C3           1  MISA-TKIKSVDFYRKIPRDLTEASLSGAGLSIVAALVMMFLFGMELNNYLSVSTTTSVI
G.maxPDI-C4           1  MISA-TKIKSVDFYRKIPRDLTEASLSGAGLSIVAALAMVFLFGMELSSYLSVSTTTSVI
V.viniferaPDI-C       1  MVST-SKIKSVDFYRKIPRDLTEASLSGAGLSIVAALSMMFLFGMELNNYLSVSTTTSVI
P.trichocarpaPDI-C1  1  MVST-NKIKSVDFYRKIPRDLTEASLSGAGLSIVAALAMVFLFGMELNNYLVNTTTSVI
P.trichocarpaPDI-C2  1  MVST-NKIKSVDFYRKIPRDLTEASLSGAGLSIVAALAMVFLFGMELNNYLVNTTTSVI
P.patensPDI-C         1  MVST-SKIKSVDFYRKIPRDLTEASLSGAGLSIVAALTMVFLFGMELNNYLVNTTTSVI
S.moellendorffiiPDI-C 1  MTTA-SKIKSVDFYRKIPRDLTEASLSGAGLSIVAALFAMVFLFGMELNNYLVNTTTSVI
C.subellipsoideaPDI-C 1  MARVLQKLSVDFYRKIPRDLTEASLSGAGLSIVAALFAMVFLFGMELNNYLVNTTTSVI
C.reinhardtiiPDI-C   1  MVRLFSRLKALDFYRKIPRDLTEASLSGAGLSIVAALVMMFLFGMELSSYLSVSTTTSVI
V.carteriPDI-C        1  MARLFSKIKALDFYRKIPRDLTEASLSGAGLSIVAALVMMFLFGMELSSYLSVSTTTSVI
    
```

```

B.distachyonPDI-C      60  VDRSSDGEFLRIDFNMSFPALSCEFASVDVSDVLGTNRLNITKTVRKFSIDRNLYPTGSE
O.sativaPDI-C         60  VDRSSDGEFLRIDFNISFPALSCEFASVDVSDVLGTNRLNITKTVRKFSIDRNLYPTGSE
E.salsugineumPDI-C1  60  VDNSSDGDGDFLRIDFNISFPALSCEFASVDVSDVLGTNRLNITKTVRKFPIDPHLRPTGAE
A.thalianaPDI12       60  VDKSSDGDGDFLRIDFNISFPALSCEFASVDVSDVLGTNRLNITKTVRKFPIDPHLRPTGAE
C.rubellaPDI-C1       60  VDKSSDGDGDFLRIDFNISFPALSCEFASVDVSDVLGTNRLNITKTVRKFPIDPHLRPTGAE
E.salsugineumPDI-C3  60  VDKSSDGDGDFLRIDFNISFPALSCEFASVDVSDVLGTNRLNITKTVRKFPIDPHLRPTGAE
A.thalianaPDI13       60  VDKSSDGDGDFLRIDFNISFPALSCEFASVDVSDVGHRLNISKTRKVPIDPHLRPTGAE
C.rubellaPDI-C3       60  VDKSSDGDGDFLRIDFNISFPALSCEFASVDVSDVLGTNRLNITKTVRKFPIDPHLRPTGAE
E.salsugineumPDI-C2  60  VDRSSDGDGDFLRIDFNISFPALSCEFASVDVSDVLGTNRLNITKTVRKFSIDSNLRPTGTE
A.thalianaPDI7        60  VDRSSDGDGDFLRIDFNISFPALSCEFASVDVSDVLGTNRLNITKTVRKFSIDSNLRPTGSE
C.rubellaPDI-C2       60  VDRSSDGDGDFLRIDFNISFPALSCEFASVDVSDVLGTNRLNITKTVRKFSIDSNLRPTGAE
S.lycopersicumPDI-C  60  VDKSSDAEFLRIDFNMSFPALSCEFASVDVSDVLGTNRLNITKTVRKHSIDKNLRPTGSE
S.tuberosumPDI-C      60  VDKSSDAEFLRIDFNMSFPALSCEFASVDVSDVLGTNRLNITKTVRKHSIDKNLRPTGSE
M.truncatulaPDI-C1    60  IDKSSDGEFLRIDFNISFPALSCEFASVDVSDVLGTNRLNITKTVRKFSIDSNLRPTGSE
P.vulgarisPDI-C1      60  VDKSSDGDYLRIDFNISFPALSCEFAAVDSDVLGTNRLNITKTVRKFSIDSNLRPTGNE
G.maxPDI-C1           60  VDKSSDGDYLRIDFNISFPALSCEFAAVDSDVLGTNRLNITKTVRKFSIDSNLRPTGAE
G.maxPDI-C2           60  VDKSSDGDYLRIDFNISFPALSCEFAAVDSDVLGTNRLNITKTVRKFSIDSNLRPTGAE
M.truncatulaPDI-C2    60  VDKSSDGDYLRIDFNISFPALSCEFAAVDSDVLGTNRLNITKTVRKFSIDSKLRPTGSE
P.vulgarisPDI-C2      60  VDKSSDHDYLRIDFNISFPALSCEFASVDVSDVLGTNRLNITKTVRKFSIDSHLRPTGAE
G.maxPDI-C3           60  VDKSSDGDYLRIDFNISFPALSCEFASVDVSDVLGTNRLNITKTVRKFSIDSNLRPTGAE
G.maxPDI-C4           60  VDKSSDGDYLRIDFNISFPALSCEFASVDVSDVLGTNRLNITKTVRKFSIDSNLRPTGAE
V.viniferaPDI-C       60  VDKSSDGDGDFLRIDFNISFPALSCEFASVDVSDVLGTNRLNITKTVRKFSIDPDLRPTGAE
P.trichocarpaPDI-C1  60  VDNSSDGEFLRIDFNISFPALSCEFASVDVSDVLGTNRLNITKTVRKFSIDHDLRPTGSE
P.trichocarpaPDI-C2  60  VDNSSDGEFLRIDFNISFPALSCEFASVDVSDVLGTNRLNITKTVRKFSIDHDLRPTGSE
P.patensPDI-C         60  VDRSSDGEFLRIDFNISFPALSCEFASVDVSDVLGTNRLNITKTVRKFPIDPDLRPTGQE
S.moellendorffiiPDI-C 60  VDRSSDGEFLRIDFNISFPALSCEFASVDVSDALGTNRYNITKTVRKFPIDPDLRPTGQE
C.subellipsoideaPDI-C 61  VDRSAHGDFLRIDFNISFPALSCEFATLDVSDALGTNRYNITKTVRKFPIDPDLRPTGQE
C.reinhardtiiPDI-C   61  VDRSPQNEFLKLNFNISFPALSCEFATLDVSDSLGTNRYNITKTVRKFPIDPDLRPTGQE
V.carteriPDI-C        61  VDRSPQNEFLKLNFNISFPALSCEFATLDVSDSLGTNRYNITKTVRKFPIDPDLRPTGQE
    
```

-----> **BLOCK#2** -----

B.distachyonPDI-C 120 FHS**G**PIPTV**N**KHG**D**V--**E**E--YH-ADGS**V**ALSS**R**N**F**D**S**Y**S**H**O**Y**P**ILVV**N**F**Y**AP**W**C**Y**W**S**N

O.sativaPDI-C 120 F**H**P**G**PIPTV**S**KHG**D**V--**E**E--NH-DDGS**V**PLSS**R**N**F**D**S**Y**S**H**O**Y**P**ILVV**N**F**Y**AP**W**C**Y**W**S**N

E.salsugineumPDI-C1 120 FHS**C**LALH**D**I**N**HG**E**S--**K**E--EF-PDGA**I**PLT**S**G**S**F**E**S**S**H**H**F**P**IL**V**V**N**F**Y**AP**W**C**Y**W**S**N

A.thalianaPDI12 120 FHS**C**LALH**N**I**N**HG**E**T--**K**E--EF-PDGA**I**PLT**S**A**S**E**A**L**S**H**H**F**P**IL**V**V**N**F**Y**AP**W**C**Y**W**S**N

C.rubellaPDI-C1 120 FHS**C**HTL**H**I**N**HG**E**T--**K**E--EF-PDGA**I**PLT**S**G**S**F**E**S**S**H**H**F**P**IL**V**V**N**F**Y**AP**W**C**Y**W**S**N

E.salsugineumPDI-C3 120 FHS**T**TGL**D**L**I**NHG**D**E**D**--**H**H--E**N**S**Y**A**A**I**P**L**T**G**A**T**F**D**K**I**S**H**H**F**P**IL**V**V**N**F**Y**AP**W**C**Y**W**S**N

A.thalianaPDI13 120 FHS**T**SDL**H**L**I**NHG**D**E**D**--**H**G--D**N**S**T**Y**A**D**I**PL**T**G**A**F**E**K**I**T**H**H**F**PIL**V**V**N**F**Y**AP**W**C**Y**W**S**N

C.rubellaPDI-C3 120 FHS**T**SGL**H**L**I**NHG**D**E**D**--**H**E--E**N**-T**Y**I**D**I**P**L**T**G**A**T**F**E**K**Y**K**H**H**F**P**IL**V**V**N**F**Y**AP**W**C**Y**W**S**N

E.salsugineumPDI-C2 120 FHS**C**EVLS**L**I**N**HG**D**E**A**--**G**E--E**L**-V**E**D**S**V**L**T**G**R**N**F**D**T**L**L**H**O**F**P**I**S**V**V**N**F**Y**AP**W**C**Y**W**C**N

A.thalianaPDI7 120 F**H**A**C**EVLS**L**I**N**HG**D**E**T**--**G**E--E**I**-V**E**D**S**V**L**T**G**R**N**F**D**T**L**T**H**O**F**P**I**L**V**V**N**F**Y**AP**W**C**Y**W**C**N

C.rubellaPDI-C2 120 F**H**A**C**EVLS**L**I**N**HG**D**E**T**--**G**E--E**V**-A**E**D**S**V**L**T**G**R**N**F**E**T**L**T**H**O**F**P**I**L**V**V**N**F**Y**AP**W**C**Y**W**C**N

S.lycopersicumPDI-C 120 F**H**S**C**STATE**I**K**H**D**A**E**D**--**D**E--E**Y**-G**E**G**S**V**S**L**N**G**H**S**F**D**R**V**T**H**H**F**P**IL**V**V**N**F**Y**AP**W**C**Y**W**S**N

S.tuberosumPDI-C 120 F**H**S**C**STATE**I**K**H**D**A**E**D**--**D**E--E**Y**-G**E**G**S**V**S**L**N**G**H**S**F**D**R**V**T**H**H**F**P**IL**V**V**N**F**Y**AP**W**C**Y**W**S**T

M.truncatulaPDI-C1 120 F**Y**L**R**P**S**T**N**V**I**K**H**D**K**V--**D**D--E**S**-L**E**G**A**F**V**F**T**S**N**F**D**K**Y**S**H**O**F**P**I**T**A**V**N**F**Y**AP**W**C**Y**W**S**Q

P.vulgarisPDI-C1 120 F**H**S**E**P**T**T**T**N**I**K**H**D**N**E**Q**--**H**E--E**S**-I**G**G**A**T**E**L**T**T**D**N**F**D**K**Y**A**H**O**F**P**I**T**V**I**N**F**Y**AP**W**C**Y**S**Q

G.maxPDI-C1 120 F**H**S**E**PA**A**N**S**I**K**H**D**N**E**V--**N**E--E**S**-V**E**G**S**V**V**L**K**T**O**N**F**D**K**Y**A**H**O**F**P**I**T**V**V**N**F**Y**AP**W**C**Y**S**Q

G.maxPDI-C2 120 F**H**S**E**PA**A**N**S**I**K**H**D**N**E**V--**N**E--E**S**-V**E**G**S**V**V**L**T**T**O**N**F**D**K**Y**A**H**O**F**P**I**T**V**V**N**F**Y**AP**W**C**Y**S**Q

M.truncatulaPDI-C2 120 F**H**S**C**T**I**A**N**A**V**K**H**D**D**E**V**--**D**T--D**F**-V**E**G**S**L**P**L**T**S**O**H**F**D**K**Y**V**O**L**F**P**I**T**V**V**N**F**Y**AP**W**C**W**C**Q

P.vulgarisPDI-C2 120 F**H**S**C**A**V**S**N**A**V**K**H**D**D**E**V**--**D**G--E**S**-V**E**G**S**F**S**F**T**T**H**N**F**D**K**Y**A**H**O**F**P**I**T**V**V**N**F**Y**AP**W**C**W**C**Q

G.maxPDI-C3 120 F**H**S**C**T**V**A**N**A**V**K**H**D**D**E**V**--**D**E--E**S**-V**E**G**S**F**S**L**T**T**H**N**F**D**K**Y**V**H**O**F**P**I**T**V**V**N**F**Y**AP**W**C**W**C**Q

G.maxPDI-C4 120 F**H**S**C**T**V**A**N**A**V**K**H**D**D**E**V**--**D**E--E**S**-V**E**G**S**F**S**L**T**T**H**N**F**D**K**Y**V**H**O**F**P**I**T**V**V**N**F**Y**AP**W**C**W**C**Q

V.viniferaPDI-C 120 F**H**S**G**P**V**G**K**V**I**K**H**G**D**E**T**--**D**E--E**Y**-S**E**G**S**A**S**L**T**A**O**N**F**Y**K**Y**S**H**O**H**A**IL**V**V**N**F**Y**AP**W**C**Y**W**S**T

P.trichocarpaPDI-C1 120 F**H**S**G**P**V**L**H**O**I**K**H**G**D**E**V**--**D**E--E**G**-G**E**G**S**V**S**L**K**A**H**N**F**D**O**Y**S**H**O**Y**P**IL**V**V**N**F**Y**AP**W**C**Y**W**S**N

P.trichocarpaPDI-C2 120 F**H**S**G**P**V**L**H**I**N**HG**D**E**V**--**H**E--E**G**-S**E**G**S**V**S**L**K**A**H**N**F**D**O**Y**T**H**O**Y**P**IL**V**V**N**F**Y**AP**W**C**Y**W**S**N

P.patensPDI-C 120 F**H**A**C**S**V**P**N**I**K**S**H**G**D**E**D**V**G**E**M**F**E**H**L**G**E**G**A**V**E**L**N**K**N**T**F**D**V**A**Q**O**F**S**I**L**V**V**N**F**Y**AP**W**C**Y**W**S**N

S.moellendorffiiPDI-C 120 F**H**P**C**P**I**P**N**P**T**S**H**G**D**E**D**--**H**E-----G**E**G**A**H**V**L**T**S**S**T**F**D**E**Y**A**R**R**Y**S**V**L**V**V**N**F**Y**AP**W**C**I**W**S**A**

C.subellipsoideaPDI-C 121 V**H**D**D**L**S**N**V**I**K**Y**D**E**P**S-----V**S**O**D**F**A**I**P**L**S**K**D**S**F**K**A**T**L**E**A**Y**S**I**L**V**V**V**N**F**Y**AP**W**C**Y**W**C**Q

C.reinhardtiiPDI-C 121 V**E**D**T**A**H**K**V**G**P**K**Y**D**A**E**G**H**F**D**E**--E**P**D**I**D**I**T**V**P**L**S**H**E**N**F**E**A**T**L**A**R**Y**P**I**A**V**I**N**F**Y**AP**W**C**H**W**C**Q

V.carteriPDI-C 121 V**E**D**S**S**H**K**P**G**K**Y**D**E**G**R**F**D**E**--E**P**D**I**D**I**T**V**P**L**S**H**V**N**F**E**A**T**L**A**R**Y**P**I**V**V**V**N**F**Y**AP**W**C**H**W**C**Q

-----> **BLOCK#3** -----

B.distachyonPDI-C 175 R**L**K**P**S**W**E**K**T**A**K**I**I**K**E**R**Y**D**P**E**M**D**G**R**I**L**L**A**K**V**D**C**T**E**E**G**E**L**C**R**R**H**H**I**Q**G**Y**P**S**I**R**I**F**R**K**G**S**D**M**K**

O.sativaPDI-C 175 R**L**K**P**S**W**E**K**T**A**K**I**M**R**E**R**Y**D**P**E**M**D**G**R**I**L**L**A**K**V**D**C**T**E**E**T**D**L**C**R**R**H**H**I**Q**G**Y**P**S**I**R**I**F**R**K**G**S**D**L**K**

E.salsugineumPDI-C1 175 R**L**K**P**S**W**E**K**A**A**N**I**I**K**O**R**Y**D**P**E**T**D**G**R**V**L**L**G**N**V**D**C**T**E**E**A**A**L**C**R**R**N**H**I**Q**G**Y**P**S**I**R**I**F**R**K**G**S**D**L**R**

A.thalianaPDI12 175 R**L**K**P**S**W**E**K**A**A**N**I**I**K**O**R**Y**D**P**E**A**D**G**R**V**L**L**G**N**V**D**C**T**E**E**P**A**L**C**R**R**N**H**I**Q**G**Y**P**S**I**R**I**F**R**K**G**S**D**L**R**

C.rubellaPDI-C1 175 R**L**K**P**S**W**E**K**A**A**N**I**I**K**O**R**Y**D**P**E**T**D**G**R**V**L**L**G**N**V**D**C**T**E**E**P**A**L**C**R**R**N**H**I**Q**G**Y**P**S**I**R**I**F**R**K**G**S**D**L**R**

E.salsugineumPDI-C3 176 R**L**K**P**S**W**E**K**A**A**E**I**T**I**K**O**Y**D**P**E**D**D**G**R**V**L**L**G**S**V**D**C**T**E**E**P**T**L**C**R**R**N**H**I**Q**G**Y**P**S**I**R**I**F**R**K**G**S**D**L**R**

A.thalianaPDI13 176 R**L**K**P**S**W**V**K**A**S**O**I**T**R**E**R**Y**D**P**E**T**D**D**R**V**L**L**G**S**V**D**C**T**E**E**P**T**L**C**R**S**N**H**I**Q**G**Y**P**S**I**R**I**F**R**K**G**S**D**L**R**

C.rubellaPDI-C3 175 R**L**K**P**S**W**E**K**A**S**O**I**T**R**E**R**Y**D**P**E**T**D**D**R**V**L**L**G**S**V**D**C**T**E**E**S**T**L**C**R**S**N**H**I**Q**G**Y**P**S**I**R**I**F**R**K**G**S**D**L**R**

E.salsugineumPDI-C2 175 L**L**K**P**S**W**E**K**A**A**K**O**I**K**E**R**Y**D**P**E**M**D**G**R**V**I**L**A**K**V**D**C**T**O**E**S**D**L**C**R**R**N**H**I**Q**G**Y**P**S**I**R**I**F**R**K**G**S**D**L**R**

A.thalianaPDI7 175 L**L**K**P**S**W**E**K**A**A**K**O**I**K**E**R**Y**D**P**E**M**D**G**R**V**I**L**A**K**V**D**C**T**O**E**G**D**L**C**R**R**N**H**I**Q**G**Y**P**S**I**R**I**F**R**K**G**S**D**L**K**

C.rubellaPDI-C2 175 L**L**K**P**S**W**E**K**A**A**K**O**I**K**E**R**Y**D**P**E**M**D**G**R**V**I**V**A**K**V**D**C**T**O**E**G**D**L**C**R**R**N**H**I**Q**G**Y**P**S**I**R**I**F**R**K**G**S**D**L**K**

S.lycopersicumPDI-C 175 R**L**K**P**S**W**E**K**A**A**N**I**I**R**E**R**Y**D**R**E**S**D**G**R**I**L**V**A**K**V**D**C**T**E**E**V**D**L**C**R**R**N**H**I**Q**G**Y**P**S**I**R**I**F**R**K**G**T**D**V**R**

S.tuberosumPDI-C 175 R**L**K**P**S**W**E**K**A**A**N**I**I**R**E**R**Y**D**R**E**S**D**G**R**I**L**V**A**K**V**D**C**T**E**E**V**D**L**C**R**R**N**H**I**Q**G**Y**P**S**I**R**I**F**R**K**G**S**D**V**R**

M.truncatulaPDI-C1 175 R**L**K**P**S**W**E**K**T**A**K**I**I**R**E**R**Y**D**P**E**M**D**G**R**I**L**L**G**K**V**D**C**T**K**E**A**D**L**C**R**R**H**H**I**Q**G**Y**P**S**I**R**I**F**R**K**G**S**D**V**R**

P.vulgarisPDI-C1 175 R**L**K**P**S**W**E**K**A**S**K**I**I**K**E**R**Y**D**P**E**T**D**G**R**I**V**M**G**R**V**D**C**T**O**N**G**E**L**C**R**S**H**H**V**Q**G**Y**P**S**I**R**I**F**R**K**G**S**D**V**R**

G.maxPDI-C1 175 R**L**K**P**S**W**E**K**A**A**K**I**I**K**E**R**Y**D**P**E**M**D**G**R**I**L**L**G**R**V**D**C**T**E**E**G**D**L**C**R**S**H**H**I**Q**G**Y**P**S**I**R**I**F**R**K**G**S**D**V**R**

G.maxPDI-C2 175 R**L**K**P**S**W**E**K**T**A**K**I**I**K**E**R**Y**D**P**E**M**D**G**R**I**L**L**G**R**V**D**C**T**E**E**G**D**L**C**R**S**H**H**I**Q**G**Y**P**S**I**R**I**F**R**K**G**S**D**V**R**

M.truncatulaPDI-C2 175 R**L**K**P**S**W**E**K**A**A**K**I**M**R**E**R**Y**D**P**E**M**D**G**R**I**L**L**A**K**V**D**C**T**O**E**G**D**L**C**R**R**H**H**I**Q**G**Y**P**S**I**R**I**F**R**K**G**S**D**V**R**

P.vulgarisPDI-C2 175 R**L**K**P**S**W**E**K**T**A**K**I**M**K**E**R**Y**D**P**E**M**D**G**R**I**I**M**G**K**V**D**C**T**E**E**G**D**L**C**R**R**N**H**I**Q**G**Y**P**S**I**R**I**F**R**K**G**S**D**L**R**

G.maxPDI-C3 175 R**L**K**P**S**W**E**K**T**A**K**I**M**K**E**R**Y**D**P**E**M**D**G**R**I**L**L**A**K**V**D**C**T**O**E**G**D**L**C**R**R**N**H**I**Q**G**Y**P**S**I**R**I**F**R**K**G**S**D**L**R**

G.maxPDI-C4 175 R**L**K**P**S**W**E**K**T**A**K**I**M**K**E**R**Y**D**P**E**M**D**G**R**I**L**L**A**K**V**D**C**T**O**E**G**D**L**C**R**R**N**H**I**Q**G**Y**P**S**I**R**I**F**R**K**G**T**D**L**R**

V.viniferaPDI-C 175 R**L**K**P**S**W**E**K**A**A**K**I**I**R**E**R**Y**D**P**E**L**D**G**R**I**V**M**A**K**V**D**C**T**E**E**G**E**L**C**R**R**H**H**I**Q**G**Y**P**S**I**R**I**F**R**K**G**S**D**V**R**

P.trichocarpaPDI-C1 175 R**L**K**P**S**W**E**K**A**A**K**I**I**R**E**R**Y**D**P**E**M**D**G**R**I**L**L**A**K**V**D**C**T**E**E**G**D**L**C**R**R**N**H**I**Q**G**Y**P**S**I**R**I**F**R**K**G**S**N**L**R**

P.trichocarpaPDI-C2 175 R**L**K**P**S**W**E**K**A**A**K**I**I**R**E**R**Y**D**P**E**L**D**G**R**I**L**L**A**K**V**D**C**T**E**E**G**D**L**C**R**R**N**H**I**Q**G**Y**P**S**I**R**I**F**R**K**G**S**D**L**R**

P.patensPDI-C 180 R**L**K**P**S**W**E**K**A**A**K**I**I**A**D**K**Y**N**P**E**M**D**G**R**I**L**L**A**K**V**D**C**T**V**N**V**E**L**C**R**S**H**H**I**Q**G**Y**P**S**I**R**I**F**R**K**G**H**D**V**R**

S.moellendorffiiPDI-C 173 R**L**K**P**S**W**D**K**A**A**G**I**I**A**E**K**Y**H**P**E**T**-**G**R**I**L**L**G**K**V**D**C**T**D**N**N**D**L**C**R**R**H**H**I**Q**G**F**P**S**I**R**I**F**H**K**G**H**D**L**K**

C.subellipsoideaPDI-C 174 R**L**E**P**T**W**E**A**V**T**O**E**V**H**T**K**Y**-**P**E**A**D**G**R**I**R**F**A**K**V**D**C**T**E**V**D**L**C**R**H**O**I**T**C**F**P**S**I**R**V**F**R**S**G**H**D**E**V**

C.reinhardtiiPDI-C 179 R**L**E**P**T**W**E**A**A**T**K**E**V**H**D**K**Y**-**P**E**W**D**G**R**I**R**F**A**K**V**D**C**T**A**E**V**D**L**C**R**H**O**F**I**O**C**F**P**S**I**R**V**F**R**K**G**H**D**D**I**

V.carteriPDI-C 179 R**L**E**P**T**W**E**A**A**T**K**E**V**H**D**K**Y**-**P**E**W**D**G**R**I**R**F**A**K**V**D**C**T**O**E**M**E**L**C**R**T**H**F**I**O**C**F**P**S**I**R**V**F**R**K**G**H**D**D**I**

----->

|                       |     |                                                                |
|-----------------------|-----|----------------------------------------------------------------|
| B.distachyonPDI-C     | 235 | ENQGHHDHESYYGRDTSILVAAMETTYVGNIPKEAHMLALEDKSNKTVDPAPKRPAPMTSG  |
| O.sativaPDI-C         | 235 | ENQGHHDHESYYGDRDTSILVAAMETTYVANIPKCAHVLALEDKSNKTVDPAPKRPAPMTSG |
| E.salsugineumPDI-C1   | 235 | EDHGHEHESYYGDRDTSIVKMMVEGLVAPHPETHKVALDGGKSNDTVKHKKK-APVTGG    |
| A.thalianaPDI12       | 235 | EDHGHEHESYYGDRDTSIVKMMVEGLVAPHPETHKVALDGGKSNDTVKHKKK-APVTGG    |
| C.rubellaPDI-C1       | 235 | EDHGHEHESYYGDRDTSIVKMMVEGLVAPHPETHKVALDGGKSNDTVKHKKK-APVTGG    |
| E.salsugineumPDI-C3   | 236 | EDHGHEHESYYGDRDTSILKMMVEELLKPIKKEDEKLLPLDGGISVNTASSKKK-APVSGG  |
| A.thalianaPDI13       | 236 | EDHGHEHESYYGDRDTSILKMMVEELLKPIKKEDEKLLPLDGGISVNTASSKKK-APVSGG  |
| C.rubellaPDI-C3       | 235 | DDHGHDHESYYGDRDTSIVKMMVEELLKPIKKEDEKLLPLDGGKSENAASTVKKK-APVSGG |
| E.salsugineumPDI-C2   | 235 | DDNAHHDHESYYGDRDTSIVKMMVIGLVEPIHLEPQRLALEDKSDNASKIKKK-APSTGG   |
| A.thalianaPDI7        | 235 | DDNAHHDHESYYGDRDTSIVKMMVSLVEPIHLEPHNLALEDKSDNSSRTIKKK-APSTGG   |
| C.rubellaPDI-C2       | 235 | DDNAHHEHESYYGDRDTSIVKMMVSLVEPIHLEPHNLALEDKSGNSSKTIKKK-APSTGG   |
| S.lycopersicumPDI-C   | 235 | DDHGHDHESYYGDRDTSIVKMMEDLVAPIKLDSQTITSDNSSTKLETGKRPAPVTTGG     |
| S.tuberosumPDI-C      | 235 | DDHGHDHESYYGDRDTSIVKMMEDLVAPIKLDSQMISSENSSTKLETGKRPAPVTTGG     |
| M.truncatulaPDI-C1    | 235 | SDHGHEHESYYGDRDTSIVKTMENILASFPSEYYKLALEDKLNVTEDSKRPAPSSGG      |
| P.vulgarisPDI-C1      | 235 | TDHGHDHESYYGDRDTSIVKTMENLVASIPTESQKSHSGDKS-NLASTIKRPAPSSGG     |
| G.maxPDI-C1           | 235 | SNHGHDHESYYGDRDTSIVKTMENLVASIPSESQKLPLEDKS-DVAKNTERPAPSTGG     |
| G.maxPDI-C2           | 235 | SDHGHDHESYYGDRDTSIVKTMENLVASIPSESQKLPLEDKS-NVATNTERPAPSTGG     |
| M.truncatulaPDI-C2    | 235 | SDHGHEHESYYGDRDTSIVKTMETLVASIPTEGSQLALEDKS----NGTKRPAPSTGG     |
| P.vulgarisPDI-C2      | 235 | SEHGHEHESYYGDRDTSIVKTFMENLVTSIPTASQKPALEDKS-NATDNAKRPAPSSAGG   |
| G.maxPDI-C3           | 235 | SEHGHEHESYYGDRDTSIVKFMEDLVTSIPTESQKLALEDKS-NAADNAKRPAPSSAGG    |
| G.maxPDI-C4           | 235 | SEHGHEHESYYGDRDTSIVKFMEDLVTSIPTESQKLALEDKS-NASDNAKRPAPSSAGG    |
| V.viniferaPDI-C       | 235 | DDHGHDHESYYGDRDTSIVKTMETLVAPIPLESQRLALENKSDSTADHKRPAPRTGG      |
| P.trichocarpaPDI-C1   | 235 | EDHGHDHESYYGDRDTSIVKTMELVAPIPAMESQORQALEHKKPENATQHWKRPAPSSAGG  |
| P.trichocarpaPDI-C2   | 235 | DDHGHDHESYYGDRDTSIVKTMELVAPIPAMESQORQALEHKKPENATEHWKRPAPSSAGG  |
| P.patensPDI-C         | 240 | DEHGHDHESYYGDRDTSIVAFMVELVPPATVVGKFOLEKSSITVFNATIKRPAPKAGG     |
| S.moellendorffiiPDI-C | 232 | DEHGHEHESYYGRDTSILVKAMFALVP----KETTALLEDKTI----NGTVKRPAPRAGG   |
| C.subellipsoideaPDI-C | 233 | NVHCVKHEHESYGRDTSQASLLAFADNLAPSAGQPHHYIR-----GVTIR-MAKTSG      |
| C.reinhardtiiPDI-C    | 238 | YIGGMHEHESYMGDRTKDALVAFADSLVPSAGQPHRKLKLA-----GISA-AFKTPG      |
| V.carteriPDI-C        | 238 | VIGGMHEHESYMGDRTKDALVAFADSLVPSAGQPHRKHHA-----AISA-AFKTPG       |

----->

|                       |     |                                                                |
|-----------------------|-----|----------------------------------------------------------------|
| B.distachyonPDI-C     | 295 | CRVEGFVRVKKVPGSVIISARSGSHSFDPSQINVSHYVTOFSFGNRLSPNMFSELKRLIP   |
| O.sativaPDI-C         | 295 | CRIEGFVRVKKVPGSVIISARSGSHSFDPSQINVSHYVTOFSFGKRLSAKMFNEIKRLIP   |
| E.salsugineumPDI-C1   | 294 | CRVEGYVRVKKVPGNLVISAHSGAHSFDSQMNMSHVVTLSFGKRLSPRLLTDMKRLIP     |
| A.thalianaPDI12       | 294 | CRVEGYVRVKKVPGNLVISAHSGAHSFDSQMNMSHVVSHTFSFGKRLSPRLLTDMKRLIP   |
| C.rubellaPDI-C1       | 294 | CRVEGYVRVKKVPGNLVISAHSGAHSFDSQMNMSHVVSHTLSFGKRLSPRLLTDMKRLIP   |
| E.salsugineumPDI-C3   | 295 | CRIEGYVRAKKVPGELVISAHSGAHSFDSQMNMSHFVTHLSFGKRLSPRLLTDMKRLIP    |
| A.thalianaPDI13       | 295 | CRIEGYVRAKKVPGELVISAHSGAHSFDSQMNMSHVTVTHLTFGTMSERLWTDKRLIP     |
| C.rubellaPDI-C3       | 294 | CRIEGYVRAKKVPGELVISAHSGAHSFDSQMNMSHVTVTHLTFGTMSERLWTDKRLIP     |
| E.salsugineumPDI-C2   | 294 | CRIEGYMRVKKVPGNLVISAHSGAHSFDSQMNMSHVVNHLISFGKRLSPRLLTDMKRLIP   |
| A.thalianaPDI7        | 294 | CRIEGYMRVKKVPGNLVISAHSGAHSFDSQMNMSHVVNHLISFGKRLSPRLLTDMKRLIP   |
| C.rubellaPDI-C2       | 294 | CRIEGYMRVKKVPGNLVISAHSGAHSFDSQMNMSHVVNHLISFGKRLSPRLLTDMKRLIP   |
| S.lycopersicumPDI-C   | 295 | CRIEGFVRVKKVPGNLVISAHSAHSFDSQMNMSHVVISSEFSFGKRLTPKVMSDIKRLIP   |
| S.tuberosumPDI-C      | 295 | CRIEGFVRVKKVPGNLVISAHSAHSFDSQMNMSHVVISSEFSFGKRLTPKVMSDIKRLIP   |
| M.truncatulaPDI-C1    | 294 | CRIEGYVRVKKVPGNLVISAHSDAHSFDSQMNMSHAVVHLSFGKRLSPKLMSDVQRLIP    |
| P.vulgarisPDI-C1      | 294 | CRIEGYVRVKKVPGNLVISAHSDAHSFDSQMNMSHVVNHLISFGKRVSPRVMSDVKRLIP   |
| G.maxPDI-C1           | 294 | CRIDGYVRVKKVPGNLVISAHSDAHSFDSQMNMSHVVNHLISFGKRVSPRVMSDVKRLIP   |
| G.maxPDI-C2           | 294 | CRIDGYVRVKKVPGNLVISAHSDAHSFDSQMNMSHVVNHLISFGKRVSLRVMSDVKRLIP   |
| M.truncatulaPDI-C2    | 291 | CRIEGYVRVKKVPGSLVISAHSDAHSFDSQMNMSHVVNHLISFGKRVTPRAMIDVHWIP    |
| P.vulgarisPDI-C2      | 294 | CRIEGYVRVKKVPGNLVISAHSDAHSFDSQMNMSHVVNHLISFGKRVTPRAMSDVKRLIP   |
| G.maxPDI-C3           | 294 | CRIEGYVRVKKVPGNLVISAHSDAHSFDSQMNMSHVVNHLISFGKRVTPRAMSDVKRLIP   |
| G.maxPDI-C4           | 294 | CRIEGYVRVKKVPGNLVISAHSDAHSFDSQMNMSHFINNLSFGKRVTPRAMSDVKRLIP    |
| V.viniferaPDI-C       | 295 | CRIEGFVRVKKVPGNLVISAHSGSHSFDPSQMNMSHVVISHLSFGKRLAPRVMSDMKRVLIP |
| P.trichocarpaPDI-C1   | 295 | CRIEGYVRVKKVPGNLVISAHSGAHSFDSQMNLSHVVISSEFSFGKRVLPVMSDVKRLIP   |
| P.trichocarpaPDI-C2   | 295 | CRIEGYVRVKKVPGNLVISAHSGAHSFDSQMNLSHVVISSEFSFGKRVLPVMSDVKRLIP   |
| P.patensPDI-C         | 300 | CRVEGFVRVKKVPGELMISAHSGSHSFDASMNMTHYVGFPSFGKRLSWRVSVHWVNEMLIP  |
| S.moellendorffiiPDI-C | 285 | CRIEGFTRAKKVPGNLVISAHSGSHSFDASMNMTHYVSQFTFGREINFWWRRELYRIYIP   |
| C.subellipsoideaPDI-C | 282 | CALSGFVVLVKKVPGALHFLAKSPGHSFDYQAMNMSHVVNLYFGNIPSPRRHQSLAKLHP   |
| C.reinhardtiiPDI-C    | 287 | CNLAGEFVMVKKVPGTLVHFVARSEGHSHFDHFWNMTHMHSFHVGTIPSPRKYQQLKRLHP  |
| V.carteriPDI-C        | 287 | CNLAGEFVMVKKVPGTLVHFVARSEGHSHFDHFWNMTHLVHTFHVGTIPSPRKYQQLKRLHP |

BLOCK#5----->

BLOCK#6

B.distachyonPDI-C 355 YVGGHHD---RLAGQSYIVKHGDNNANVTIEHYLQIVKTELVTLRSSKELKLVFEEYEY  
O.sativaPDI-C 355 YVGGHHD---RLAGQSYIVKHGDVNNANVTIEHYLQIVKTELVTLRSSKELKLVFEEYEY  
E.salsugineumPDI-C1 354 YLGGSHG---RLDCKAFINQ-HEFGANVTIEHYLQIVKTEVITRRSGQEHSLIEEYEY  
A.thalianaPDI12 354 YLGLSHD---RLDCKAFINQ-HEFGANVTIEHYLQIVKTEVITRRSGQEHSLIEEYEY  
C.rubellaPDI-C1 354 YLGGSHD---RLDCKAFINQ-HEFGANVTIEHYLQIVKTEVITRRSGLEQAVIEEYEY  
E.salsugineumPDI-C3 355 YLGGSHD---RLNCKWFINQ-GQFANVTIEHYLQIVKTEVVSRRFGQEHSLIEEYEY  
A.thalianaPDI13 355 YLGGSYD---RLNCKSFINE-RQLDANVTIEHYLQIVKTEVVSRRSGQEHSLIEEYEY  
C.rubellaPDI-C3 354 YLGGSHD---RLNCKSFINQ-RQLDANVTIEHYLQIVKTEVVSRRFGRHSLIEEYEY  
E.salsugineumPDI-C2 354 YLGRSHD---RLDGRPFINQ-RDLGPNVTIEHYLQIVKTEVVKSN---GQALVEAYEY  
A.thalianaPDI7 354 YLGRSHD---RLDGRPFINQ-RDLGPNVTIEHYLQIVKTEVVKSN---GQALVEAYEY  
C.rubellaPDI-C2 354 YLGRSHD---RLDGRPFINQ-RDLGPNVTIEHYLQIVKTEVVKSN---GQALVEAYEY  
S.lycopersicumPDI-C 355 HLGSRSHD---RLNNSYVTNPRDSTENVTEIHFLOVVKTEVMTR---SYKLVIEEYEY  
S.tuberosumPDI-C 355 HLGSRSHD---RLNNSYVTNPRDSTENVTEIHFLOVVKTEVMTR---SYKLVIEEYEY  
M.truncatulaPDI-C1 354 YVGNSHD---RLDCLSFINS-HDFGANVTIEHYLQIVKTEVITRQ---GYQLVEEYEY  
P.vulgarisPDI-C1 354 YVGS SHD---RLNGLSFINT-RDFGANVTIEHYLQIVKTEVITRK---DHKLVIEEYEY  
G.maxPDI-C1 354 YVGS SHD---RLNGRSFINT-HDFGANVTIEHYLQIVKTEVITRK---DYKLVIEEYEY  
G.maxPDI-C2 354 YVGS SHD---RLNGRSFINT-HDFGANVTIEHYLQIVKTEVITRK---DYKLVIEEYEY  
M.truncatulaPDI-C2 351 YLGINHD---RLNGRSFINT-RDLGNVTIEHYLQIVKTEVITRK---GYKLVIEEYEY  
P.vulgarisPDI-C2 354 YLGS SHD---RLSGRSFINT-RDFGANVTIEHYLQIVKTEVVNRK---GYKLVIEEYEY  
G.maxPDI-C3 354 YIGSSH D---RLNGRSFINT-RDLGANVTIEHYLQIVKTEVVTRK---GYKLVIEEYEY  
G.maxPDI-C4 354 YIGSSH D---RLNGRSFINT-HDFGANVTIEHYLQIVKTEVVTRN---GYKLVIEEYEY  
V.viniferaPDI-C 355 YIGSSH D---RLNGRSYVSHPSDSNANVTIEHYLQIVKTEVITR---DHKLVIEEYEY  
P.trichocarpaPDI-C1 355 YIGSRSHD---KLNGRSFINH-RDVGANVTIEHYLQVVKTEVVTRSSSRKLVIEEYEY  
P.trichocarpaPDI-C2 355 HIGSRSHD---KLNGRSFINH-RDVGANVTIEHYLQVVKTEVVTRSSSRKLVIEEYEY  
P.patensPDI-C 360 ALDSNID---RLTGQVFPESE---YENTHHDHYLQVVKTEVITLRKQDLRVLEQYDYT  
S.moellendorffiiPDI-C 345 HLASVYDVEANLIGRIYVYVQ---HENITHDHYLQVVKTEVVSLEKRRKFSLLBOYDYT  
C.subellipsoideaPDI-C 342 -AGLSDDWAD-KLAGQDFFSR---AAKATFEHYQVVLITIEPSKRRPILSY-DAYEY  
C.reinhardtiiPDI-C 347 -AGLTHDWAD-KLHDQLFVSE---HTQSTHEHYLQVVLITIEPRHSRHTGNY-DAYEY  
V.carteriPDI-C 347 -AGLTHDWAD-QLRDQFFVSE---HPOSTHEHYLQIVLITIEPRHSRHSNGY-DAYEY

B.distachyonPDI-C 411 AHSSIVHSFYVVPVKFHFEPSPMQVLVTELEPKSFSHFITNVCAIIGGVFTVAGILDSILH  
O.sativaPDI-C 411 AHSSIVHSFYVVPVKFHFEPSPMQVLVTELEPKSFSHFITNVCAIIGGVFTVAGILDSIFH  
E.salsugineumPDI-C1 409 AHSSVAQTYYPVAKFHFELSPMQVLITENPKSFSHFITNLCAIIGGVFTVAGILDSIFH  
A.thalianaPDI12 409 AHSSVAQTYYPVAKFHFELSPMQVLITENPKSFSHFITNLCAIIGGVFTVAGILDSIFH  
C.rubellaPDI-C1 409 AHSSVAQTYYPVAKFHFELSPMQVLITENPKSFSHFITNLCAIIGGVFTVAGILDSIFH  
E.salsugineumPDI-C3 410 AHSSVAHSYYPVAKFHFELSPMQVLISENPKSFSHFITNVCAIIGGVFTVAGILDSIFQ  
A.thalianaPDI13 410 AHSSVARSYHYPEAKFHFELSPMQVLISENPKSFSHFITNVCAIIGGVFTVAGILDSIFQ  
C.rubellaPDI-C3 409 AHSSVAHSYHYPEAKFHFELSPMQVLISENPKSFSHFITNVCAIIGGVFTVAGILDSIFQ  
E.salsugineumPDI-C2 406 AHSSVAQSYYPVAKFHFELSPMQVLITENPKSFSHFITNVCAIIGGVFTVAGILDSILH  
A.thalianaPDI7 406 AHSSVAHSYYPVAKFHFELSPMQVLITENPKSFSHFITNVCAIIGGVFTVAGILDSILH  
C.rubellaPDI-C2 406 AHSSVAQSYYPVAKFHFELSPMQVLITENPKSFSHFITNVCAIIGGVFTVAGILDSILH  
S.lycopersicumPDI-C 407 AHSSIVHSLHIPVAKFHFELSPMQVLITENPKSFSHFITNVCAIIGGVFTVAGILDSILH  
S.tuberosumPDI-C 407 AHSSIVHSLHIPVAKFHFELSPMQVLITENPKSFSHFITNVCAIIGGVFTVAGILDSILH  
M.truncatulaPDI-C1 406 AHSSVAHSLHIPVAKFHFELSPMQVLITENPKSFSHFITNVCAIIGGVFTVAGILDSILH  
P.vulgarisPDI-C1 406 AHSSVAQSLHIPVAKFHFELSPMQVLITENPKSFSHFITNVCAIIGGVFTVAGILDSILH  
G.maxPDI-C1 406 AHSSVAQSLHIPVAKFHFELSPMQVLITENPKSFSHFITNVCAIIGGVFTVAGILDSILH  
G.maxPDI-C2 406 AHSSVAQSLHIPVAKFHFELSPMQVLITENPKSFSHFITNVCAIIGGVFTVAGILDSILH  
M.truncatulaPDI-C2 403 AHSSVAHSVNIIPVAKFHFELSPMQVLITENPKSFSHFITNVCAIIGGVFTVAGILDSILH  
P.vulgarisPDI-C2 406 AHSSVAHSVDIPVAKFHFELSPMQVLITENPKSFSHFITNVCAIIGGVFTVAGILDSILH  
G.maxPDI-C3 406 AHSSVAHSLDIPVAKFHFELSPMQVLITENPKSFSHFITNVCAIIGGVFTVAGILDSILH  
G.maxPDI-C4 406 AHSSVAHSVDIPVAKFHFELSPMQVLITENPKSFSHFITNVCAIIGGVFTVAGILDSILH  
V.viniferaPDI-C 408 AHSSIVQSLYIPVAKFHFELSPMQVLITENPKSFSHFITNVCAIIGGVFTVAGILDSVH  
P.trichocarpaPDI-C1 410 AHSSIVQSLYIPVAKFHFELSPMQVLITENPKSFSHFITNVCAIIGGVFTVAGILDSILH  
P.trichocarpaPDI-C2 410 AHSSVAQTYYPVAKFHFELSPMQVLITENPKSFSHFITNVCAIIGGVFTVAGILDSILH  
P.patensPDI-C 412 AHSSVAQTYYPVAKFHFELSPMQVLITENPKSFSHFITNVCAIIGGVFTVAGILDSMLH  
S.moellendorffiiPDI-C 401 SHSNITQNTNVPVAKFHFELSPMQVLITENPKSFSHFITNVCAIIGGVFTVAGILDSMLH  
C.subellipsoideaPDI-C 395 VHSHTYDADIPVAKFHFELSPMQVLITENPKSFSHFITNVCAIIGGVFTVAGILDSMLH  
C.reinhardtiiPDI-C 400 AHSSVAQSDIPVAKFHFELSPMQVLITENPKSFSHFITNVCAIIGGVFTVAGILDSMLH  
V.carteriPDI-C 400 AHSSHTYQSDAIPVAKFHFELSPMQVLITENPKSFSHFITNVCAIIGGVFTVAGILDSMLH

----->

|                       |     |                  |
|-----------------------|-----|------------------|
| B.distachyonPDI-C     | 471 | NTLRVKKVELGKDI   |
| O.sativaPDI-C         | 471 | NTLRVKKVELGKNI   |
| E.salsugineumPDI-C1   | 469 | NTLRVKKVELGKNI   |
| A.thalianaPDI12       | 469 | NTVRLVKKVELGKNI  |
| C.rubellaPDI-C1       | 469 | NTIRLVKKVELGKNI  |
| E.salsugineumPDI-C3   | 470 | NTIRLVKKVELGKNI  |
| A.thalianaPDI13       | 470 | NTVRMVKKTELGNKI  |
| C.rubellaPDI-C3       | 469 | NTVRLVKKTELGNKI  |
| E.salsugineumPDI-C2   | 466 | QTMILMKKTELGNFI  |
| A.thalianaPDI7        | 466 | HSMILMKKTELGNFI  |
| C.rubellaPDI-C2       | 466 | HTMILMKKTELGNFI  |
| S.lycopersicumPDI-C   | 467 | NTMRMVKKVELGNFI  |
| S.tuberosumPDI-C      | 467 | NTMRMVKKVELGNFI  |
| M.truncatulaPDI-C1    | 466 | NTIRLMRKVELGNFI  |
| P.vulgarisPDI-C1      | 466 | NTIRLMKKVELGNFI  |
| G.maxPDI-C1           | 466 | NTIRLMKKVELGNFI  |
| G.maxPDI-C2           | 466 | NTIRLMKKVELGNFI  |
| M.truncatulaPDI-C2    | 463 | NTIRLMKKTELGNFI  |
| P.vulgarisPDI-C2      | 466 | NTIRLMKKVELGNFI  |
| G.maxPDI-C3           | 466 | NTIRMVKKTELGNFI  |
| G.maxPDI-C4           | 466 | NTIRMMKKVELGNFI  |
| V.viniferaPDI-C       | 468 | NTMRLMKKTELGNFI  |
| P.trichocarpaPDI-C1   | 470 | HTVRMMKKVELGNFI  |
| P.trichocarpaPDI-C2   | 470 | NTFRMMKKVELGNFI  |
| P.patensPDI-C         | 472 | NAMHILMKKVELGKQY |
| S.moellendorffiiPDI-C | 461 | GAMRMVKKTELGKQF  |
| C.subellipsoideaPDI-C | 455 | TGARFAKKVELGKHT  |
| C.reinhardtiiPDI-C    | 460 | QSFKVVKKLNLGKOG  |
| V.carteriPDI-C        | 460 | QSFKVVKKLNLGKOG  |

Multiple sequence alignment for NJ tree in Online Reference 4

BLOCK#1-----

|                       |   |                           |                            |                     |
|-----------------------|---|---------------------------|----------------------------|---------------------|
| C.subellipsoideaPDI-C | 1 | ----MARVL-QKLSVDFYRKIPNDL | TEATLAGAGLSIVFAFTIVVLLTAE  | LSSTFAIET           |
| C.reinhardtiiPDI-C    | 1 | ----MVRFL-SRLKALDFYRKIPSD | TEATLTGAWLSIVAALVIMLLFVAEL | SAFSTTT             |
| V.carteriPDI-C        | 1 | ----MARLF-SFKLALDFYRKIPSD | TEATLTGAWLSIVAALVIMVLEF    | TAMMSFTTT           |
| K.flaccidumPDI-C      | 1 | ----MNRVL-GRLRSVDFYRRI    | PRDLTEATLAGGTLVVASTIAMV    | LLFGMELQAYLTTSA     |
| B.rapaPDI-C1          | 1 | -----MVSPTKLLKSMDFYRKIP   | PRDLTEASLSGAGLSIVAALVMM    | LLFGMELSSYLAVNT     |
| B.rapaPDI-C2          | 1 | -----MVSPTKLLKSMDFYRKIP   | PRDLTEASLSGAGLSIVAALVMM    | LLFGMELSSYLEVNT     |
| E.salsugineumPDI-C1   | 1 | -----MVSSTKLLKSVDFYRKIP   | PRDLTEASLSGAGLSIVAALVMM    | LLFGMELSSYLEVST     |
| A.thalianaPDI12       | 1 | -----MVSSTKLLKSVDFYRKIP   | PRDLTEASLSGAGLSIVAALFMM    | LLFGMELSSYLEVNT     |
| C.rubellaPDI-C1       | 1 | -----MVSSTKLLKSVDFYRKIP   | PRDLTEASLSGAGLSIVAALFMM    | LLFGMELSSYLEVNT     |
| B.rapaPDI-C5          | 1 | -----MVSTTKIKSVDFYRKIP    | PRDLTEASLSGAGLSITAAALAM    | MLFGMELSTYLAVT      |
| A.thalianaPDI13       | 1 | -----MVSTKIKSVDFYRKIP     | PRDLTEASLSGAGLSIVAALAML    | FLFGMELSSYLAIN      |
| C.rubellaPDI-C3       | 1 | -----MVSTTKIKSVDFYRKIP    | PRDLTEASLSGAGLSIVAALAML    | FLFGMELSSYLAVNT     |
| B.rapaPDI-C6          | 1 | -----MVSTTKIKSVDFYRKIP    | PRDLTEASLSGAGLSITAAALAM    | MLFGMELSTYLAVT      |
| E.salsugineumPDI-C3   | 1 | -----MVSTTKIKSVDFYRKIP    | PRDLTEASLSGAGLSIVAALAM     | VFLFGMELSNYLAVST    |
| S.bicolorPDI-C        | 1 | -----MISSSKLLKSVDFYRKIP   | PRDLTEASLSGAGLSIVAALAM     | VFLFGMELSNYLAVNT    |
| Z.maysPDI-C           | 1 | -----MISSSKLLKSVDFYRKIP   | PRDLTEASLSGAGLSIVAALAM     | VFLFGMELSNYLAVNT    |
| B.distachyonPDI-C     | 1 | -----MISSSKLLKSVDFYRKIP   | PRDLTEASLSGAGLSIVAALAM     | VFLFGMELSSYLAVNT    |
| O.sativaPDI-C         | 1 | -----MISSSKLLKSVDFYRKIP   | PRDLTEASLSGAGLSIVAALAM     | VFLFGMELSNYLAVNT    |
| B.rapaPDI-C4          | 1 | -----MISPRKIKSVDFYRKIP    | PRDLTEASLSGAGLSIVAALSML    | LLFGMELSSYITVST     |
| A.thalianaPDI7        | 1 | -----MVSTSKIKSVDFYRKIP    | PRDLTEASLSGAGLSITAAALSML   | FLFGMELNNYLAVST     |
| C.rubellaPDI-C2       | 1 | -----MVSTSKIKSVDFYRKIP    | PRDLTEATLSGAGLSITAAALSML   | FLFGMELNNYLAVST     |
| B.rapaPDI-C3          | 1 | -----MVSTSRIKSVDFYRKIP    | PRDLTEATLSGAGLSIVAALSML    | FLFGMELNNYLAVST     |
| E.salsugineumPDI-C2   | 1 | -----MVSTSKIKSVDFYRKIP    | PRDLTEATLSGAGLSIVAALSML    | FLFGMELNNYLAVST     |
| S.lycopersicumPDI-C   | 1 | -----MVSTSKIKSVDFYRKIP    | PRDLTEASLSGAGLSIVAALCM     | FLFGMELNNYITVST     |
| S.tuberosumPDI-C      | 1 | -----MVSTSKIKSVDFYRKIP    | PRDLTEASLSGAGLSIVAALSMM    | FLFGMELNNYITVST     |
| M.truncatulaPDI-C1    | 1 | -----MTTASKIKSVDFYRKIP    | PRDLTEASLSGAGLSIVAALAM     | MFLFGMELNEYLSVHT    |
| P.vulgarisPDI-C1      | 1 | -----MISSSKLLKSVDFYRKIP   | PRDLTEASLSGAGLSIVAALCM     | VFLFGMELNSYLSVST    |
| G.maxPDI-C1           | 1 | -----MISSSKIKSVDFYRKIP    | PRDLTEASLSGAGLSIVAALAM     | MLFGMELNSYLSVST     |
| G.maxPDI-C2           | 1 | -----MISSSKIKSVDFYRKIP    | PRDLTEASLSGAGLSIVAALAM     | MLFGMELNSYLSVST     |
| M.truncatulaPDI-C2    | 1 | -----MLSASKLLKSVDFYRKIP   | PRDLTEASLSGAGLSILAAALAM    | MFLFGMELSNYFAVTT    |
| P.vulgarisPDI-C2      | 1 | -----MISATKLLKSVDFYRKIP   | PRDLTEASLSGAGLSIVAALSMM    | FLFGMELSNYITVST     |
| G.maxPDI-C3           | 1 | -----MISATKLLKSVDFYRKIP   | PRDLTEASLSGAGLSIVAALVMM    | FLFGMELNSYLSVST     |
| G.maxPDI-C4           | 1 | -----MISATKLLKSVDFYRKIP   | PRDLTEASLSGAGLSIVAALAM     | MFLFGMELSSYLSVST    |
| V.viniferaPDI-C       | 1 | -----MVSTSKIKSVDFYRKIP    | PRDLTEASLSGAGLSIVAALSMM    | FLFGMELSNYLSVST     |
| C.sativusPDI-C        | 1 | -----MISSTKLLKSVDFYRKIP   | PRDLTEATLSGAGLSIVAALSMM    | VFLFGMELSNYLSVST    |
| P.persicaPDI-C        | 1 | -----MISTGKIKSVDFYRKIP    | PRDLTEASLSGAGLSITAAALAM    | MFLFGMELNSYFAVST    |
| T.cacaoPDI-C          | 1 | -----MISSSKIKSVDFYRKIP    | PRDLTEASLSGAGLSIVAALAM     | MFLFGMELSNYITVST    |
| P.trichocarpaPDI-C1   | 1 | -----MVSTNKLKSVDFYRKIP    | PRDLTEASLSGAGLSIVAALAM     | MFLFGMELNNYITVNT    |
| P.trichocarpaPDI-C2   | 1 | -----MVSTNKLKSVDFYRKIP    | PRDLTEASLSGAGLSIVAALAM     | VFLFGMELNNYITVNT    |
| S.moellendorffiiPDI-C | 1 | -----MTTASKIKSVDFYRKIP    | PRDLTEASLSGAGLSLIAAFAM     | LFLFGMELNSYITVSS    |
| P.patensPDI-C         | 1 | -----MVSTSKLLKSVDFYRKIP   | PRDLTEASLSGAGLSITAAALTM    | VFLFGMELSAYLSTTT    |
| C.reinhardtiiERV-A    | 1 | --MSGGGFL-GKLLKALDAYPK    | INEDFFTKTMSGGIITIVSVVM     | VLLFLSELRLYTTTSS    |
| V.carteriERV-A        | 1 | MSNSGGGFL-SKLLKALDAYPK    | INEDFFTKTMSGGIITIVSVVM     | VLLFLSELRLYMTTQS    |
| C.subellipsoideaERV-A | 1 | ----MEGIV-SKLLKALDAYPK    | INEDFFQRTLSGGIITIGSSI      | IMLCLFSELRLYFKGIT   |
| K.flaccidumERV-A      | 1 | ----MGDVL-NYLKLDAYPK      | INEDFYRSLTSGGLITLVSSI      | FIVLFFTELGLFHTTKT   |
| B.distachyonERV-A3    | 1 | ----MDGFL-QKLLKGLDAYPK    | VNEDFYKRTLSSGGVVTIVS       | AVVMMLLFISETRSFYSAT |
| O.sativaERV-A3        | 1 | ----MEGFL-QKLLKGLDAYPK    | VNEDFYKRTLSSGGVVTIVS       | AVVMMLLFVSETRSFYSAT |
| Z.maysERV-A3          | 1 | ----MDAFL-QRLKRLDAYPK     | VNEDFYKRTLSSGGVITVVA       | AVVMMLLFISETRSFYSAT |
| Z.maysERV-A2          | 1 | ----MDAFL-QRLKRLDAYPK     | VNEDFYKRTLSSGGVITVVA       | AVVMMLLFISETRSFYSAT |
| S.bicolorERV-A3       | 1 | ----MDAFL-QRLKRLDAYPK     | VNEDFYKRTLSSGGVITVVA       | AVVMMLLFISETRSFYSAT |
| P.patensERV-A1        | 1 | ---MALQMI-QKLLKSLDAYPK    | INEDFYRSLTSGGIITISAT       | FMVLLFFSELRLYIAAQV  |
| P.patensERV-A4        | 1 | -----MSFF-NKLLKGLDAYPK    | ISEDFYRSLTSGGLITLVSS       | FMVLLFITFRIYSAQT    |
| P.patensERV-A2        | 1 | -----MAVF-NKLLKGLDAYPK    | ISEDFYRSLTSGGVITLVST       | VMFVLFVTEISLYLSAQT  |
| P.patensERV-A3        | 1 | -----MAVF-NKLLKGLDAYPK    | ISEDFYRSLTSGGVITLVSS       | FMVLLFVTEFRIYSAQT   |
| S.bicolorERV-A2       | 1 | -----MELW-SKLRNLDAYPK     | VNEDFYRSLTSGGLITLSS        | LATLFFSELRLYYSAT    |
| B.distachyonERV-A2    | 1 | -----MDLW-NKLRNLDAYPK     | VNEDFYRSLTSGGLITLASS       | LAILLFFSELRLYYSAT   |
| O.sativaERV-A2        | 1 | -----MDLW-NKLRNLDAYPK     | VNEDFYRSLTSGGLITLASS       | LAILLFLSELRLYYSAT   |
| S.moellendorffiiERV-A | 1 | -----MQML-KKLLQGLDAYPK    | INEDFHSRTLSSGGVITVSS       | IFMALLFITELKLLPLPQT |
| C.sativusERV-A3       | 1 | -----MDAIF-NKLRNLDAYPK    | INEDFYRRTLSSGLITLASS       | FFMFLFFSELRLYHAKT   |
| M.truncatulaERV-A2    | 1 | ----MDKVF-NKLRNLDAYPK     | VNEDFYNRTLSSGGVITVVA       | AVVMMFLFFSELRLYTYVT |
| P.vulgarisERV-A2      | 1 | ----MDKVF-NKLRNLDAYPK     | VNEDFYRSLTSSGGVITVVA       | AVVMMFLFFSELRLYTYVT |
| G.maxERV-A3           | 1 | ----MDKVF-NKLRNLDAYPK     | VNEDFYNRTLSSGGVITVVA       | AVVMMFLFFSELRLYTYVT |
| G.maxERV-A4           | 1 | ----MDKVF-NKLRNLDAYPK     | VNEDFYNRTLSSGGVITVVA       | AVVMMFLFFSELRLYTYVT |
| S.lycopersicumERV-A2  | 1 | ----MERVF-SKLRNLDAYPK     | INEDFYNRTLSSGIITLVAS       | IMLVFVNLGLYHYSY     |
| S.tuberosumERV-A2     | 1 | ----MERVF-SKLRNLDAYPK     | INEDFYNRTLSSGIITLVAS       | IMLVFVNLGLYHYSY     |
| P.persicaERV-A2       | 1 | ----MDSIL-QKLRNLDAYPK     | INDEFFSRTLSSGIITLASS       | LILLFFSELRLYHTVT    |
| T.cacaoERV-A2         | 1 | ----MENVF-NKLRNLDAYPK     | VNEDFYRSLTSGGIITLVSS       | LAIFFLFFSELRLYHTVT  |
| P.trichocarpaERV-A3   | 1 | ----MEGIY-QKLRNLDAYPK     | INEDFYRSLTSGGLITLSSI       | IMLFFSELRLYHAVT     |
| P.trichocarpaERV-A4   | 1 | ----MDRIY-QKVRNLDAYPK     | INEDFYRSLTSGGLITLSSI       | VLLIFLFFSELRLYHKVT  |
| C.sativusERV-A1       | 1 | ----MESLM-NKIRKGLDAYPK    | ISEDFYNRTLSSGIITLASS       | IMLFFSELRLYHTAT     |
| V.viniferaERV-A2      | 1 | ----MDRVF-QRLKRLDAYPK     | INEDFYRRTLSSGLITLSSI       | VMLFFLFFSELRLYHTVT  |
| B.rapaERV-A4          | 1 | -----M-NRLRNLDAYPK        | INEDFYKRTLSSGGVITLVSS      | VVMMLLFFSELRLYHPVT  |
| B.rapaERV-A3          | 1 | -----M-NRLRNLDAYPK        | INEDFYNRTLSSGLITLFS        | SLLMLLFFSELRLYHPVT  |
| E.salsugineumERV-A2   | 1 | ----MVGVM-NRLRNLDAYPK     | INEDFYRRTLSSGGVITLVSS      | VVMLLFFSELRLYHPVT   |

## BLOCK#1

A.thalianaERV-A2 1 ----MVGVM-NRLRNLDAYPKINEDFYRRTLSSGGVITLASSIVMLLFFSELRQLYLHPVT  
C.rubellaERV-A2 1 ----MVGVM-NRLRNLDAYPKINEDFYRRTLSSGGVITLSSLLMLVLFSELRQLYLHPVT  
B.rapaERV-A2 1 ----MAGVM-NRLRNLDAYPKINDDFYRRTLSSGGLITLASSLVMLLFFSELRRLYLHPVT  
E.salsugineumERV-A3 1 ----MPGVM-NRLRNLDAYPKINDDFYRRTLSSGGLITLSSIFMLLFFSELRRLYLHPVT  
B.distachyonERV-A1 1 ----MDGLM-SKLRSLDAYPKVNEEDFYRRTLSSGGVITLASSFVMLLFFVSELRLYLHAVT  
O.sativaERV-A1 1 ----MEGLL-SKLRSLDAYPKVNEEDFYRRTLSSGGIITLASSVVMMLLFFVSELRLYLHAVT  
S.bicolorERV-A1 1 ----MDGLL-SKLRSLDAYPKVNEEDFYRRTLSSGGVITLASSVIMMLLFFVSELRLYLHAVT  
Z.maysERV-A1 1 ----MDGLL-SKLRSLDAYPKVNEEDFYRRTLSSGGIITLVSSAVMLLFFVSELRLYLHAVT  
S.lycopersicumERV-A1 1 ----MDSFV-SKIRSLDAYPKINEDFYRRTLSSGGVITLASSIIMTLLFISELRRLYLHAAT  
S.tuberosumERV-A1 1 ----MDSFI-SKIRSLDAYPKINEDFYRRTLSSGGVITLASSIIMTLLFISELRRLYLHAAT  
B.rapaERV-A1 1 ----MAGIL-NKLRNLDAYPKINEDFYRRTLSSGGVITLVSSVVMFLLFFSELRRLYLHSTV  
E.salsugineumERV-A1 1 ----MAGIL-NKLRNLDAYPKINEDFYRRTLSSGGVITLFFSVVMFLLFFSELRRLYLHTVT  
A.thalianaERV-A1 1 ----MAGIL-NKLRNLDAYPKINEDFYRRTLSSGGVITLSSVVMFLLFFSELRRLYLHTVT  
C.rubellaERV-A1 1 ----MAGIL-NKLRNLDAYPKINEDFYRRTLSSGGVITLSSVVMFLLFFSELRRLYLHTVT  
V.viniferaERV-A1 1 ----MDNII-NKLRNLDAYPKINEDFYRRTLSSGGVITLASSIFMLLFFISELRRLYLHAVT  
C.sativusERV-A2 1 ----MDNII-SKLRNLDAYPKINEDFYRRTLSSGGVITLSSSILMLLFFISELRRLYLHAVT  
M.truncatulaERV-A1 1 ----MDSIM-NKLRNLDAYPKINEDFYRRTLSSGGLITIVSSILMLLFFISELRRLYLHAAT  
P.persicaERV-A1 1 ----MENMM-SRLRNLDAYPKINEDFYRRTLSSGGVITLASSIVMLLFLSELRRLYLHAVT  
P.vulgarisERV-A1 1 ----MEGIM-SKLRNLDAYPKINEDFYRRTLSSGGVITLASSIIMMLLFFSELRRLYLQSVT  
G.maxERV-A1 1 ----MDSIM-SKLRNLDAYPKINEDFYRRTLSSGGVITLASSIIMMLLFFSELRRLYLHAVT  
G.maxERV-A2 1 ----MESII-SKLRNLDAYPKINEDFYRRTLSSGGVITLASSIIMMLLFFSELRRLYLHAVT  
T.cacaoERV-A1 1 ----MDGIM-NKLRNLDAYPKINEDFYRRTLSSGGVITLVSSVVMFLLFFSELRRLYLHAVT  
P.trichocarpaERV-A1 1 ----MEGLM-SKLRNLDAYPKINEDFYRRTLSSGGVITLASSVVMFLLFFSELRRLYLHAVT  
P.trichocarpaERV-A2 1 ----MDGLM-SKLRNLDAYPKINEDFYRRTLSSGGVITLASSIVMLLFFSELRRLYLHAVT  
C.reinhardtiiERV-B 1 ----MGKGR---LSSLSAYVYKPEAHLVNOITHGALVTLCCVLIATLTLFLHLSKSYQMHR  
V.carteriERV-B 1 -----MKF--KLSSLAYVYKPEAHLVQQTVMHGALVTLCCVLIAMLFVHLSGSYRQHR  
C.subellipsoideaERV-B 1 -----MKIK--SFRNFSAYVYKPEAHLVQRTYFGAVTVLCCVLIATLFLFANELREYTPFS  
K.flaccidumERV-B 1 ----MAFKIAALSRLDAYPRAESHLTQRTISGAATSIMCISLMVLLFVNELQFYTPYT  
P.patensERV-B 1 ----MRKEKW-QVIRNLDAPRAEEDHLLQKTQSGAVVSAICLFIIMGVLLFFHELRYLHTVT  
S.moellendorffiiERV-B 1 ----MGIK---MKNINAFPAEEDHLLQKTQSGAVVSAICLFIIMGVLLFFHELRYLSTNV  
S.bicolorERV-B 1 ----MARI-PSLKSINAFPAEEDHLLKKTYSGAVVTIFCLLIMVTLFVHLSQFYTTYT  
Z.maysERV-B 1 ----MARI-PSLKSINAFPAEEDHLLKKTYSGAVVTIFCLLIMVTLFVHLSQFYTTYT  
B.distachyonERV-B 1 ----MGRI-PSLKNFNAPFAEEDHLLKKTYSGAVVTIFCLLIMVTLFVHLSQFYTTYT  
O.sativaERV-B 1 ----MGRI-PSLKNFNAPFAEEDHLLKKTYSGAVVTIFCLLIMVTLFVHLSQFYTTYT  
B.rapaERV-B2 1 ----MGVK-QALRSIDAFPAEEDHLLQKTQSGAVVSVGLLIMATLFLHLSYINTLT  
B.rapaERV-B1 1 ----MGVK-QALRSIDAFPAEEDHLLQKTQSGAVVSVGLLIMATLFLHLSYINTLT  
E.salsugineumERV-B 1 ----MGVK-QALKSIDAFPAEEDHLLQKTQSGAVVSVGLLIMATLFLHLSYINTLT  
A.thalianaERV-B 1 ----MGVK-QALRSIDAFPAEEDHLLQKTQSGAVVSVGLLIMATLFLHLSYINTLT  
C.rubellaERV-B 1 ----MGVK-QALRSIDAFPAEEDHLLQKTQSGAVVSVGLLIMATLFLHLSYINTLT  
M.truncatulaERV-B 1 ----MGMK-QVIRNLDAPRTEEDHLLQKTQSGALVSIICLIMATLFLHLSYINTLT  
P.vulgarisERV-B 1 ----MGMK-QVIRNLDAPRAEEDHLLQKTQSGALVSVICLIMATLFLVHLSYINTLT  
G.maxERV-B1 1 ----MGMK-QVIRNLDAPRAEEDHLLQKTQSGALVSVICLIMATLFLVHLSYINTLT  
G.maxERV-B2 1 ----MGMK-QVIRNLDAPRAEEDHLLQKTQSGALVSVICLIMATLFLVHLSYINTLT  
C.sativusERV-B 1 ----MGLK-QTIRSLDAFPRAEEDHLLQKTQSGAVVSVGLVIMATLFLHLSYINTLT  
S.lycopersicumERV-B1 1 ----MGVK-QVLRAMDAFPRAEEDHLLQKTQSGAVVSVGLVIMSTLFLHLSYINTLT  
S.tuberosumERV-B1 1 ----MGVK-QVLRAMDAFPRAEEDHLLQKTQSGAVVSVGLVIMSTLFLHLSYINTLT  
S.lycopersicumERV-B2 1 ----MGVK-QALRAIDAFPAEEDHLLKTKFGAVSVICLIMVTLFLHLSYINTLT  
S.tuberosumERV-B2 1 ----MGVK-QALRAIDAFPAEEDHLLKTKFGAVSVICLIMVTLFLHLSYINTLT  
P.persicaERV-B 1 ----MGVK-QALKSLDAFPRAEEDHLLQKTQSGAVVSVGLLIMATLFLVHLSYINTLT  
P.trichocarpaERV-B1 1 ----MGMK-QAIKSLDAFPRAEEDHLLQKTQSGALVSIICLVIMATLFLYHLSYINTLT  
P.trichocarpaERV-B2 1 ----MGVK-QAIKSLDAFPRAEEDHLLQKTQSGALVSVICLVIMATLFLYHLSYINTLT  
V.viniferaERV-B 1 ----MGVK-QFIRSLHAFPAEEDHLLQKTQSGAVVSIICLVIMATLFLHLSYINTLT  
T.cacaoERV-B 1 ----MGVK-QALKSLDAFPRAEEDHLLQKTQSGALVSVICLVIMATLFLHLSYINTLT



-----> BLOCK#2 ----->

C.subellipsoideaPDI-C 56 KEELIVDRSAHGDLRLRINFNISFPALSCEFATLDVSDALGTRKRN----LTKTIRKLPIT  
C.reinhardtiiPDI-C 56 SSQLVVDRSPQNEELKLNFNISFPALSCEFATVDVSDSLGTRKRN----LTKTVRKVPI  
V.carteriPDI-C 56 TTQLIVDRSPQNEELKLNFNISFPALSCEFATVDVSDTLGTRKRN----LTKTVRKMPI  
K.flaccidumPDI-C 56 TTTVLIDRSRDGDVLRINFNISFPALSCEFASVDVSDVLCGTHRIN----LTKTVRKFPPI  
B.rapaPDI-C1 55 TTAVVVDKSDGDFLRIDFNISFPALSCEFASVDVSDVLCGTRNRLN----LTKTVRKFPPI  
B.rapaPDI-C2 55 TTAVVVDKSDGDFLRIDFNISFPALSCEFASLDVNDVLCGTRNRLN----LTKTVRKFPPI  
E.salsugineumPDI-C1 55 TTAVVVDNSADGDFLRITFNISFPALSCEFASVDVSDVLCGTRNRLN----LTKTVRKFPPI  
A.thalianaPDI12 55 TTAVVVDKSDGDFLRIDFNISFPALSCEFASVDVSDVLCGTRNRLN----LTKTVRKFPPI  
C.rubellaPDI-C1 55 TTSVIVDKSDGDFLRIDFNISFPALSCEFASVDVSDVLCGTRNRLN----LTKTVRKFPPI  
B.rapaPDI-C5 55 QTSVVVDNSDDDFLRIDFNISFPALSCEFATFEVSDVLCSTNRLN----LTKTIKRVPI  
A.thalianaPDI13 55 STSVIVDKSSDGDFLRINIDFNISFPALSCEFASVDVSDVLCGTRNRLN----LTKTVRKFPPI  
C.rubellaPDI-C3 55 STSVIVDKSSDGDFLRINIDFNISFPALSCEFASVDVSDVLCGTRNRLN----LTKTVRKFPPI  
B.rapaPDI-C6 55 NTSVIVDKSSDGDFLRINIDFNISFPALSCEFASVDVSDVLCGTRNRLN----LTKTIKRVPI  
E.salsugineumPDI-C3 55 NTSVIVDKSSDGDFLRIDFNISFPALSCEFASVDVSDVLCGTRNRLN----LTKTVRKFPPI  
S.bicolorPDI-C 55 TTSVIVDRSSDGEFLRIDFNISFPALSCEFASVDVSDVLCGTRNRLN----LTKTVRKFSI  
Z.maysPDI-C 55 TTSVIVDRSSDGEFLRIDFNISFPALSCEFASVDVSDVLCGTRNRLN----LTKTVRKFSI  
B.distachyonPDI-C 55 TTSVIVDRSSDGEFLRIDFNISFPALSCEFASVDVSDVLCGTRNRLN----LTKTVRKFSI  
O.sativaPDI-C 55 STSVIVDRSSDGEFLRIDFNISFPALSCEFASVDVSDVLCGTRNRLN----LTKTVRKFSI  
B.rapaPDI-C4 55 TTSVIVDRSSDGDFLRMDFNISFPALSCEFASVDVSDVLCGTRNRLN----LTKTVRKFSI  
A.thalianaPDI7 55 STSVIVDRSSDGDFLRMDFNISFPALSCEFASVDVSDVLCGTRNRLN----LTKTVRKFSI  
C.rubellaPDI-C2 55 STSVIVDRSSDGDFLRMDFNISFPALSCEFASLDVSDVLCGTRNRLN----LTKTVRKFSI  
B.rapaPDI-C3 55 TTSVIVDRSSDGDFLRMDFNISFPALSCEFASVDVSDVLCGTRNRLN----LTKTVRKFSI  
E.salsugineumPDI-C2 55 TTSVIVDRSSDGDFLRMDFNISFPALSCEFASVDVSDVLCGTRNRLN----LTKTVRKFSI  
S.lycopersicumPDI-C 55 TTSVIVDKSSDAEFLRIDFNISFPALSCEFASVDVSDVLCGTRNRLN----LTKTVRKFSI  
S.tuberosumPDI-C 55 TTSVIVDKSSDAEFLRIDFNISFPALSCEFASVDVSDVLCGTRNRLN----LTKTVRKFSI  
M.truncatulaPDI-C1 55 STSVIVDKSSDGEFLRIDFNISFPALSCEFASVDVSDVLCGTRNRLN----LTKTVRKFSI  
P.vulgarisPDI-C1 55 ATSVIVDKSSDGDYLRIDFNISFPALSCEFAAVDSDVLCGTRNRLN----LTKTVRKFSI  
G.maxPDI-C1 55 STQVIVDKSSDGDYLRIDFNISFPALSCEFAAVDSDVLCGTRNRLN----LTKTVRKFSI  
G.maxPDI-C2 55 STQVIVDKSSDGDYLRIDFNISFPALSCEFAAVDSDVLCGTRNRLN----LTKTVRKFSI  
M.truncatulaPDI-C2 55 STSVIVDKSSDGDFLRIDFNISFPALSCEFASVDVSDVLCGTRNRLN----LTKTVRKFSI  
P.vulgarisPDI-C2 55 STSVIVDKSSDHDYLRIDFNISFPALSCEFASVDVSDVLCGTRNRLN----LTKTVRKFSI  
G.maxPDI-C3 55 STSVIVDKSSDGDYLRIDFNISFPALSCEFASVDVSDVLCGTRNRLN----LTKTVRKFSI  
G.maxPDI-C4 55 STSVIVDKSSDGDYLRIDFNISFPALSCEFASVDVSDVLCGTRNRLN----LTKTVRKFSI  
V.viniferaPDI-C 55 STSVIVDQSSDGDFLRIFENISFPALSCEFASVDVSDVLCGTRNRLN----LTKTVRKFSI  
C.sativusPDI-C 55 STSVIVDQSSDGDFLRMDFNISFPALSCEFAAVDSDVLCGTRNRLN----LTKTVRKFSI  
P.persicaPDI-C 55 STSVIVDKSSDGDFLRIFENISFPALSCEFASLDVSDVLCGTRNRLN----LTKTVRKFSI  
T.cacaoPDI-C 55 STSVIVDKSSDGDYLRIDFNISFPALSCEFASVDVSDVLCGTRNRLN----LTKTVRKFSI  
P.trichocarpaPDI-C1 55 STTVIVDQSSDGEFLRIDFNISFPALSCEFASVDVSDVLCGTRNRLN----LTKTVRKFSI  
P.trichocarpaPDI-C2 55 STSVIVDQSSDGEFLRIDFNISFPALSCEFASVDVSDVLCGTRNRLN----LTKTVRKFSI  
S.moellendorffiiPDI-C 55 TTNVVVDRSRDGEYLRIQFNISFPALSCEFASVDVSDALGTRNRYN----LTKTVRKFPPI  
P.patensPDI-C 55 STSVVVDRSRDGEYLRIQFNISFPALSCEFASVDVSDVLCGTHRFN----LTKTVRKFPPI  
C.reinhardtiiERV-A 58 AHELIVDVGGR-GEKLIHEDVTFPRVPCAWLSLDAMDISELHLD----LDHVVYKQRL  
V.carteriERV-A 60 VHELIVDVGGR-GEKLIHEDVTFPRVPCAWLSLDAMDISELHLD----LDHVVYKQRL  
C.subellipsoideaERV-A 56 TNELIVDVTTR-GEQLHINFDVTFPALPCSEWLSLDAMDISEMHLN----VDHVVYKQRL  
K.flaccidumERV-A 56 VNELIVDVTTR-GEQLHINFDVTFPALPCSEWLSLDAMDVSGEQHLD----LREHDIKRRRL  
B.distachyonERV-A3 56 ETKLVVDTSR-GERLRVNFDTFFPSTPCTLLSVDTRDISCEQHHD----LREHDIKRRRL  
O.sativaERV-A3 56 ETKLVVDTSR-GERLRVNFDTFFPSTPCTLLSVDTRDISCEQHHD----LREHDIKRRRL  
Z.maysERV-A3 56 ETKLVVDTSR-GERLRVNFDTFFPSTPCTLLSVDTRDISCEQHHD----LREHDIKRRRL  
Z.maysERV-A2 56 ETKLVVDTSR-GERLRVNFDTFFLSTPCTLLSVDTRDISCEQHHD----LREHDIKRRRL  
S.bicolorERV-A3 56 ETKLVVDTSR-GERLRVNFDTFFPSTPCTLLSVDTRDISCEQHHD----LREHDIKRRRL  
P.patensERV-A1 57 ANDLVVDTSR-GGTQLINLDVTFPALACSVVSLDAMDISEAHLD----VREHDIKRRRL  
P.patensERV-A4 55 QNQLVVDTSR-GETQLINLDITFPALACSVVSLDAMDISEQHLD----VREHDIKRRRL  
P.patensERV-A2 55 QNQLVVDTSR-GETQLINLDITFPALACSVVSLDAMDISEQHLD----VREHDIKRRRL  
P.patensERV-A3 55 QNQLVVDTSR-GETQLINLDITFPALACSVVSLDAMDISELHLD----VREHDIKRRRL  
S.bicolorERV-A2 55 ESKLVVDTSR-GERLHINFDVTFPALPCSLVAVDTMDVSGEQHYD----LREHDIKRRRL  
B.distachyonERV-A2 55 ESKLVVDTSR-GERLHINFDVTFPALPCSLVAVDTMDVSGEQHYD----LREHDIKRRRL  
O.sativaERV-A2 55 DSKLVVDTSR-GERLHINFDVTFPALPCSLVAVDTMDVSGEQHYD----LREHDIKRRRL  
S.moellendorffiiERV-A 55 TSELIVDTSR-GETQLINFDITFPALACSVVSLDAMDVSGEQHLD----VREHDIKRRRL  
C.sativusERV-A3 56 ETQLVVDTSR-GGELHINFDVTFPALPCSLVAVDTMDVSGEQHLD----LREHDIKRRRL  
M.truncatulaERV-A2 56 ESKLVVDTSR-GETLHINFDVTFPAVRCVLSLDAMDISEQHLD----LREHDIKRRRL  
P.vulgarisERV-A2 56 ESTLVVDTSR-GDTLHINFDVTFPAVRCVLSLDAMDISEQHLD----LREHDIKRRRL  
G.maxERV-A3 56 ESKLVVDTSR-GDTLHINFDVTFPAVRCVLSLDAMDISEQHLD----LREHDIKRRRL  
G.maxERV-A4 56 ESKLVVDTSR-GDTLHINFDVTFPAVRCVLSLDAMDISEQHLD----LREHDIKRRRL  
S.lycopersicumERV-A2 56 ETQLVVDTSR-GGKLIHFDITFPALPCVLSLDAMDISEEHFD----LREHDIKRRRL  
S.tuberosumERV-A2 56 ETQLVVDTSR-GGKLIHFDITFPALPCVLSLDAMDISEEHFD----LREHDIKRRRL  
P.persicaERV-A2 56 ESKLVVDTSR-GETLHINFDVTFPALPCVLSLDAMDISEEHFD----LREHDIKRRRL  
T.cacaoERV-A2 56 ETKLVVDTSR-GERLRINFDVTFPALPCVLSLDAMDISEQHLD----LREHDIKRRRL  
P.trichocarpaERV-A3 56 ETKLVVDTSR-GQTLRINFDITFPALPCVLSLDAMDISEQHHD----LREHDIKRRRL  
P.trichocarpaERV-A4 56 ETKLVVDTSR-GQSLRINFDVTFPALPCVLSLDAMDISEQHLD----LREHDIKRRRL  
C.sativusERV-A1 56 ETKLVVDTSR-GERLHINFDVTFPALPCVLSLDAMDISEQHLD----LREHDIKRRRL  
V.viniferaERV-A2 56 ETKLVVDTSR-GGTLRINFDVTFPALPCVLSLDAMDISEQHHD----LREHDIKRRRL  
B.rapaERV-A4 52 ESHLRVDTSR-GEKLRINFDVTFPALQCSIISIDTMDISGERHLD----VREHDIKRRRL  
B.rapaERV-A3 52 ETQLRVDTSR-GEKLRINFDVTFPALQCSIISIDTMDISGERHLD----VREHDIKRRRL  
E.salsugineumERV-A2 56 ETQLRVDTSR-GEKLRINFDVTFPALQCSIISIDTMDISGERHLD----VREHDIKRRRL

-----> BLOCK#2 ----->

|                       |    |             |                                                 |                 |
|-----------------------|----|-------------|-------------------------------------------------|-----------------|
| A.thalianaERV-A2      | 56 | ETQLRVDTSR  | GEKLRINFDVTFPPALQCSIIISLDSMDISGERHLD            | -----VRHDIIKRRL |
| C.rubellaERV-A2       | 56 | ETQLRVDTSR  | GEKLRINFDVTFPPALQCSIIISLDSMDISGERHLD            | -----VRHDIIKRRL |
| B.rapaERV-A2          | 56 | ESQLRVDTSR  | GEKLRINFDATFPALACSIIISLDSMDISGEQHLD             | -----VRHDMSKRRL |
| E.salsugineumERV-A3   | 56 | ESQLRVDTSR  | GEKLRINFDVTFPPALACSIIISLDSMDISGEQHLD            | -----VRHDIKRRRL |
| B.distachyonERV-A1    | 56 | ETTLRVDTSR  | GETLRLINFDITFPALQCSIIISIDVMDISGEHLD             | -----VKHDVFKQRI |
| O.sativaERV-A1        | 56 | ETTLRVDTSR  | GETLRLINFDVTFPPALQCSIIISLDAMDISGEHLD            | -----VKHDIKQRI  |
| S.bicolorERV-A1       | 56 | ETTLRVDTSR  | GETLRLINFDVTFPPALQCSIIISLDAMDISGEHLD            | -----VKHDVFKQRI |
| Z.maysERV-A1          | 56 | ETTLRVDTSR  | GETLRLINFDVTFPPALQCSIIISLDAMDISGEHLD            | -----VKHDVFKQRI |
| S.lycopersicumERV-A1  | 56 | ETKLIVDTSR  | GETLRLINFDITFPALPCSIIISVDAMDISGEQHLD            | -----VRHDIKRRRL |
| S.tuberosumERV-A1     | 56 | ETKLIVDTSR  | GETLRLINFDITFPALPCSIIISVDAMDISGEQHLD            | -----VRHDIKRRRL |
| B.rapaERV-A1          | 56 | ETKLIVDTSR  | GETLRLINFDITFPALACSIIISVDAMDISGELHLD            | -----VKHDVFKRRL |
| E.salsugineumERV-A1   | 56 | ETKLIVDTSR  | GETLRLINFDITFPALACSIIISVDAMDISGELHLD            | -----VKHDIKRRRL |
| A.thalianaERV-A1      | 56 | ETKLIVDTSR  | GETLRLINFDITFPALACSIIISVDAMDISGELHLD            | -----VKHDIKRRRL |
| C.rubellaERV-A1       | 56 | ETKLIVDTSR  | GETLRLINFDITFPALACSIIISVDAMDISGELHLD            | -----VKHDIKRRRL |
| V.viniferaERV-A1      | 56 | ETKLIVDTSR  | GETLRLINFDVTFPPALPCSIIISLDAMDISGEQHLD           | -----VRHDIKRRRL |
| C.sativusERV-A2       | 56 | ETKLIVDTSR  | GETLRLINFDVTFPPALPCSIIISLDAMDISGEQHLD           | -----VKHDIKRRRL |
| M.truncatulaERV-A1    | 56 | ETKLIVDTSR  | GETLRLINFDVTFPPALACSIIISLDAMDISGEQHLD           | -----VRHDIKRRRL |
| P.persicaERV-A1       | 56 | ETKLIVDTSR  | GETLRLINFDVTFPPALPCSIIISLDAMDISGEQHLD           | -----VKHDIKRRRL |
| P.vulgarisERV-A1      | 56 | ETKLIVDTSR  | GETLRLINFDVTFPPALPCSIIISLDAMDISGEQHLD           | -----VKHDIKRRRL |
| G.maxERV-A1           | 56 | ETKLIVDTSR  | GETLRLINFDVTFPPALPCSIIISLDAMDISGEQHLD           | -----VKHDIKRRRL |
| G.maxERV-A2           | 56 | ETKLIVDTSR  | GETLRLINFDVTFPPALPCSIIISLDAMDISGEQHLD           | -----VKHDIKRRRL |
| T.cacaoERV-A1         | 56 | ETKLIVDTSR  | GETLRLINFDVTFPPALACSIIISLDAMDISGEQHLD           | -----VRHDIKRRRL |
| P.trichocarpaERV-A1   | 56 | ETKLIVDTSR  | GETLRLINFDVTFPPALPCSIIISLDAMDISGEQHLD           | -----VKHDIKRRRL |
| P.trichocarpaERV-A2   | 56 | ETKLIVDTSR  | GETLRLINFDVTFPPALPCSIIISLDAMDISGEQHLD           | -----VKHDIKRRRL |
| C.reinhardtiiERV-B    | 55 | VTVLSVDLAR  | RHALTINLDTTFPSVPCAVLSIDVLDISCTAENDASFAHMRVHKRRL |                 |
| V.carteriERV-B        | 53 | VTQMSVDLAR  | RNALTTINIDITFPALPCAVLSIDVLDIAGTAENDASYAHMHHTKRL |                 |
| C.subellipsoideaERV-B | 54 | IQTMSVDTSR  | AHYLRMNFNTYPSMPCQVLSLDATDMSCGKSGSGHAANGEIHKVRL  |                 |
| K.flaccidumERV-B      | 56 | ENEMTVDVKRG | REKLPPIHINITFPSPVLSLDAIDMSGKHEVD                | -----ISNNIWKARL |
| P.patensERV-B         | 57 | VHEMSVDVLR  | GETLPIHINMTFPALPCEVLSLDAIDMSGKHEVD              | -----DTNIWKRL   |
| S.moellendorffiiERV-B | 53 | VHQM SVDLKR | GETLPIHINITFPSPVLSLDAIDMSGKHEVD                 | -----DTNIWKRL   |
| S.bicolorERV-B        | 55 | VHQM SVDLKR | GETLPIHINMTFPALPCEVLSLDAIDMSGKHEVD              | -----HTNIWKRL   |
| Z.maysERV-B           | 55 | VHQM SVDLKR | GETLPIHINMTFPALPCEVLSLDAIDMSGKHEVD              | -----HTNIWKRL   |
| B.distachyonERV-B     | 55 | VHQM SVDLKR | GETLPIHINMTFPALPCEVLSLDAIDMSGKHEVD              | -----HTNIWKRL   |
| O.sativaERV-B         | 55 | VHQM SVDLKR | GETLPIHINMTFPALPCEVLSLDAIDMSGKHEVD              | -----HTNIWKRL   |
| B.rapaERV-B2          | 55 | VHQM SVDLKR | GETLPIHVNM TFPALPCDVLSMDAIDMSGKHEVD             | -----DTNIWKRL   |
| B.rapaERV-B1          | 55 | VHQM SVDLKR | GETLPIHVNM TFPALPCDVLSMDAIDMSGKHEVD             | -----DTNIWKRL   |
| E.salsugineumERV-B    | 55 | VHQM SVDLKR | GETLPIHVNM TFPALPCDVLSMDAIDMSGKHEVD             | -----DTNIWKRL   |
| A.thalianaERV-B       | 55 | VHQM SVDLKR | GETLPIHVNM TFPALPCDVLSMDAIDMSGKHEVD             | -----DTNIWKRL   |
| C.rubellaERV-B        | 55 | VHQM SVDLKR | GETLPIHVNM TFPALPCDVLSMDAIDMSGKHEVD             | -----DTNIWKRL   |
| M.truncatulaERV-B     | 55 | VHQM SVDLKR | GETLPIHINMTFPALPCDVLSMDAIDMSGKHEVD              | -----DTNIWKRL   |
| P.vulgarisERV-B       | 55 | VHQM SVDLKR | GETLPIHINMTFPALPCDVLSMDAIDMSGKHEVD              | -----DTNIWKRL   |
| G.maxERV-B1           | 55 | VHQM SVDLKR | GETLPIHINMTFPALPCDVLSMDAIDMSGKHEVD              | -----DTNIWKRL   |
| G.maxERV-B2           | 55 | VHQM SVDLKR | GETLPIHINMTFPALPCDVLSMDAIDMSGKHEVD              | -----DTNIWKRL   |
| C.sativusERV-B        | 55 | VHQM SVDLKR | GETLPIHINMTFPALPCDVLSMDAIDMSGKHEVD              | -----DTNIWKRL   |
| S.lycopersicumERV-B1  | 55 | VHQM SVDLKR | GETLPIHINMTFPALPCDVLSMDAIDMSGKHEVD              | -----DTNIWKRL   |
| S.tuberosumERV-B1     | 55 | VHQM SVDLKR | GETLPIHINMTFPALPCDVLSMDAIDMSGKHEVD              | -----DTNIWKRL   |
| S.lycopersicumERV-B2  | 55 | VHQM SVDLKR | GETLPIHINMTFPALPCDVLSMDAIDMSGKHEVD              | -----DTNIWKRL   |
| S.tuberosumERV-B2     | 55 | VHQM SVDLKR | GETLPIHINMTFPALPCDVLSMDAIDMSGKHEVD              | -----DTNIWKRL   |
| P.persicaERV-B        | 55 | VHQM SVDLKR | GETLPIHINMTFPALPCDVLSMDAIDMSGKHEVD              | -----DTNIWKRL   |
| P.trichocarpaERV-B1   | 55 | VHQM SVDLKR | GETLPIHINMTFPALPCDVLSMDAIDMSGKHEVD              | -----DTNIWKRL   |
| P.trichocarpaERV-B2   | 55 | VHQM SVDLKR | GETLPIHINMTFPALPCDVLSMDAIDMSGKHEVD              | -----DTNIWKRL   |
| V.viniferaERV-B       | 55 | VHQM SVDLKR | GETLPIHINMTFPALPCDVLSMDAIDMSGKHEVD              | -----DTNIWKRL   |
| T.cacaoERV-B          | 55 | VHQM SVDLKR | GETLPIHINMTFPALPCDVLSMDAIDMSGKHEVD              | -----DTNIWKRL   |

|                       |     |                                                             |
|-----------------------|-----|-------------------------------------------------------------|
| C.subellipsoideaPDI-C | 111 | ---EDGQRAC---YV-----HDDSNVDK---YDE-----                     |
| C.reinhardtiiPDI-C    | 112 | LDMRQGAAWEDTAH-----KVGPKYDAEGHFDEEPD-----                   |
| V.carteriPDI-C        | 111 | ---TELERMC---SAV-----EDSSHKPGPK---YDE-----                  |
| K.flaccidumPDI-C      | 111 | ---DHAGRTG---PEFHIIAHTVREPAHDDPAPDPD---EGAAEMEAKERQLAEGGQPP |
| B.rapaPDI-C1          | 110 | ---DPLKTTG---EEF-----HSGHGSHDN---HGE-----                   |
| B.rapaPDI-C2          | 110 | ---DPLKATG---GEF-----HSGASHHN---HGE-----                    |
| E.salsugineumPDI-C1   | 110 | ---DPLRRTG---AEF-----HSGALHDN---HGE-----                    |
| A.thalianaPDI12       | 110 | ---DPLRSTG---AEF-----HSGALHNN---HGE-----                    |
| C.rubellaPDI-C1       | 110 | ---DPLRSTG---AEF-----HSGHTLHNN---HGE-----                   |
| B.rapaPDI-C5          | 110 | ---DPLRDTG---EEY-----HPTPDSDLN---HGD-----                   |
| A.thalianaPDI13       | 110 | ---DPLRATA---EEF-----HSTSDLHLN---HGD-----                   |
| C.rubellaPDI-C3       | 110 | ---DPLRATG---TEF-----HSTSGLHLN---HGD-----                   |
| B.rapaPDI-C6          | 110 | ---DPYLRATG---AEV-----HSTSGLHLN---HGD-----                  |
| E.salsugineumPDI-C3   | 110 | ---DAHLRATG---AEF-----HSTTGLDLN---HGD-----                  |
| S.bicolorPDI-C        | 110 | ---DRNFVPTG---SEF-----HGPCIPTVNK---HGD-----                 |
| Z.maysPDI-C           | 110 | ---DRNLVPTG---SEF-----HGPCIPILNK---HGD-----                 |
| B.distachyonPDI-C     | 110 | ---DRNLVPTG---SEF-----HGPCIPTVNK---HGD-----                 |
| O.sativaPDI-C         | 110 | ---DRNLVPTG---SEF-----HGPCIPTVSK---HGD-----                 |
| B.rapaPDI-C4          | 110 | ---DSNLRPTG---SEF-----HSGEFLSRN---HGD-----                  |
| A.thalianaPDI7        | 110 | ---DSNMRPTG---SEF-----HAGEVLSLN---HGD-----                  |
| C.rubellaPDI-C2       | 110 | ---DSNMRPTG---AEF-----HAGEVLSLN---HGD-----                  |
| B.rapaPDI-C3          | 110 | ---DSNLRPTG---SEF-----HSGEVLSHN---HDE-----                  |
| E.salsugineumPDI-C2   | 110 | ---DSNLRPTG---TEF-----HSGEVLSLN---HGD-----                  |
| S.lycopersicumPDI-C   | 110 | ---DKNLRPTG---SEF-----HSGSTATELK---HDA-----                 |
| S.tuberosumPDI-C      | 110 | ---DKNLRPTG---SEF-----HSGSTATELK---HDA-----                 |
| M.truncatulaPDI-C1    | 110 | ---DSNLRPTG---SEF-----YLRPSTNVK---HDD-----                  |
| P.vulgarisPDI-C1      | 110 | ---DSNLRSTG---NEF-----HSEPTTNNK---HDN-----                  |
| G.maxPDI-C1           | 110 | ---DSNLRPTG---AEF-----HSEPAANSK---HDN-----                  |
| G.maxPDI-C2           | 110 | ---DSNLRPTG---AEF-----HSEPAANSK---HDN-----                  |
| M.truncatulaPDI-C2    | 110 | ---DSKLRPTG---SEF-----HSGTIANAVK---HDD-----                 |
| P.vulgarisPDI-C2      | 110 | ---DShLRPTG---AEF-----HSGAVSNAVK---HDD-----                 |
| G.maxPDI-C3           | 110 | ---DSNLRPTG---AEF-----HSGTVANAVK---HDD-----                 |
| G.maxPDI-C4           | 110 | ---DSNLRPTG---AEF-----HSGTVANAVK---HDD-----                 |
| V.viniferaPDI-C       | 110 | ---DPDLRPTG---AEF-----HSGPVGKVK---HGD-----                  |
| C.sativusPDI-C        | 110 | ---DSNLRSTG---SEF-----HSGPLSNLK---HGD-----                  |
| P.persicaPDI-C        | 110 | ---GPDLKPTG---SEF-----HSGPAFHDK---HGD-----                  |
| T.cacaoPDI-C          | 110 | ---DPhLRSTG---AEF-----HAGVPVPHK---HGD-----                  |
| P.trichocarpaPDI-C1   | 110 | ---DHDLKPTG---SEF-----HSGPVLHQK---HGD-----                  |
| P.trichocarpaPDI-C2   | 110 | ---DHDLKPTG---SEF-----HSGPVLHNN---HGD-----                  |
| S.moellendorffiiPDI-C | 110 | ---DPNLKIVG---PEF-----HGPCIPNPTS---HGD-----                 |
| P.patensPDI-C         | 110 | ---DPLLQRTG---QEF-----HAGSVPNIKS---HGD-----ED               |
| C.reinhardtiiERV-A    | 112 | ---NANGSPVKEVE-----KHNVDATKKK---PPS-----AVNATASA            |
| V.carteriERV-A        | 114 | ---SANGSPVKEVE-----KHNVEATKKV---VPV-----                    |
| C.subellipsoideaERV-A | 110 | ---DSNGVVIP---DSI-----EKHQVGPEID---DTL-----                 |
| K.flaccidumERV-A      | 110 | ---SPEGKPI---DVGT-----KDEHGGPKVQTGEVKVK                     |
| B.distachyonERV-A3    | 110 | ---NSHGNVIE---SR-----KEGIGGAKIE---RPL-----                  |
| O.sativaERV-A3        | 110 | ---DAHGNVIE---AR-----KEGIGGAKIE---SPL-----                  |
| Z.maysERV-A3          | 110 | ---NSHGNVIE---AR-----KEGIGGAKIE---RPL-----                  |
| Z.maysERV-A2          | 110 | ---DAHGNVIE---AR-----KVSIGGAKIE---RPL-----                  |
| S.bicolorERV-A3       | 110 | ---DSHGNVIE---AR-----KEGIGGAKIE---RPL-----                  |
| P.patensERV-A1        | 111 | ---DVNGKVI---EPAR-----QESLNQPKD---KPL-----                  |
| P.patensERV-A4        | 109 | ---DVHGKAV---DAPK-----PDATNAPKVQ---RPL-----                 |
| P.patensERV-A2        | 109 | ---DVHGKAV---NAPK-----PDATNAPKVQ---KPL-----                 |
| P.patensERV-A3        | 109 | ---DVHGKAV---DAPK-----PDATNAPKVQ---KPL-----                 |
| S.bicolorERV-A2       | 109 | ---DHLGNVIE---SR-----KDRVIGAPKIE---RPL-----                 |
| B.distachyonERV-A2    | 109 | ---DHLGNVIE---SR-----KDGVGSPKIE---RPL-----                  |
| O.sativaERV-A2        | 109 | ---DNLGNVIE---SR-----KDGVGAPKIE---RPL-----                  |
| S.moellendorffiiERV-A | 109 | ---DPSGKVVQ---PPV-----QEDHGGPKID---KPL-----                 |
| C.sativusERV-A3       | 110 | ---DHLGTVIE---AR-----PDGIGAPKIE---KPL-----                  |
| M.truncatulaERV-A2    | 110 | ---DANGKVI---ER-----KEGIGAPKIE---RPL-----                   |
| P.vulgarisERV-A2      | 110 | ---DANGNVIE---ER-----KDGIGAPKIE---RPL-----                  |
| G.maxERV-A3           | 110 | ---DANGNVIE---ER-----KDGIGAPKIE---RPL-----                  |
| G.maxERV-A4           | 110 | ---DANGNVIE---ER-----KDGIGAPKIE---RPL-----                  |
| S.lycopersicumERV-A2  | 110 | ---DSHGAVIE---VR-----QDGIIGAPKIE---KPL-----                 |
| S.tuberosumERV-A2     | 110 | ---DSHGAVIE---VR-----QDGIIGAPKIE---KPL-----                 |
| P.persicaERV-A2       | 110 | ---DAHGNVIE---AK-----KDGIGAPKID---NPL-----                  |
| T.cacaoERV-A2         | 110 | ---NAHGDVIE---SR-----QDGIIGAPKIE---KPL-----                 |
| P.trichocarpaERV-A3   | 110 | ---NAHGDVIE---VR-----QDGIIGAPKID---KPL-----                 |
| P.trichocarpaERV-A4   | 110 | ---NAHGDVIE---VR-----QEGIGAPKID---RPL-----                  |
| C.sativusERV-A1       | 110 | ---DYQGNVID---SR-----PDGIGSTEIE---RPL-----                  |
| V.viniferaERV-A2      | 110 | ---DAHGNVIA---VR-----QDGIIGPQIE---KPL-----                  |
| B.rapaERV-A4          | 106 | ---DSHGNVIE---AK-----QGGIGHTKIE---KPL-----                  |
| B.rapaERV-A3          | 106 | ---DSHGNVIE---SK-----QDGIIGHTKIE---KPL-----                 |
| E.salsugineumERV-A2   | 110 | ---DSHGNVIE---AK-----QDGIIGHTKIE---KPL-----                 |

|                       |     |     |               |       |      |            |     |     |       |
|-----------------------|-----|-----|---------------|-------|------|------------|-----|-----|-------|
| A.thalianaERV-A2      | 110 | --- | DSSGNVIE-AK   | ----- | QDGI | GHTKIE     | --- | KPL | ----- |
| C.rubellaERV-A2       | 110 | --- | DSTGNVIE-AK   | ----- | QDGI | GHTKIE     | --- | KPL | ----- |
| B.rapaERV-A2          | 110 | --- | DAYGNVIE-TR   | ----- | QDGI | GHTKIE     | --- | NPL | ----- |
| E.salsugineumERV-A3   | 110 | --- | DSSGNVIE-TR   | ----- | QDGI | GHTKIE     | --- | NPL | ----- |
| B.distachyonERV-A1    | 110 | --- | DANGNVIA-TK   | ----- | QDAV | GGMKVE     | --- | KPL | ----- |
| O.sativaERV-A1        | 110 | --- | DVHGNVIA-TK   | ----- | QDAV | GGMKVE     | --- | QPL | ----- |
| S.bicolorERV-A1       | 110 | --- | DAHGNVIA-TR   | ----- | QDAV | GGMKVE     | --- | APL | ----- |
| Z.maysERV-A1          | 110 | --- | DAHGNVIA-TR   | ----- | QDVV | GGMKVE     | --- | APL | ----- |
| S.lycopersicumERV-A1  | 110 | --- | DVLGNVIE-TR   | ----- | KEGI | GSPTID     | --- | RPL | ----- |
| S.tuberosumERV-A1     | 110 | --- | DVLGNVIE-TR   | ----- | KEGI | GSPTID     | --- | RPL | ----- |
| B.rapaERV-A1          | 110 | --- | DSHGNTIE-SR   | ----- | QDGI | GAAKIE     | --- | KPL | ----- |
| E.salsugineumERV-A1   | 110 | --- | DSHGNTIE-AR   | ----- | QDGI | GATKIE     | --- | NPL | ----- |
| A.thalianaERV-A1      | 110 | --- | DSNGNTIE-AR   | ----- | QDGI | GATKIE     | --- | NPL | ----- |
| C.rubellaERV-A1       | 110 | --- | DSNGNTIE-AR   | ----- | QDGI | GATKIE     | --- | KPL | ----- |
| V.viniferaERV-A1      | 110 | --- | DAHGSVIE-AR   | ----- | QDGI | GSPKIE     | --- | KPL | ----- |
| C.sativusERV-A2       | 110 | --- | DSHGNAIE-AR   | ----- | PDGI | GAPKIE     | --- | KPL | ----- |
| M.truncatulaERV-A1    | 110 | --- | DSHGNVIE-TR   | ----- | QDGI | GSPNIE     | --- | KPL | ----- |
| P.persicaERV-A1       | 110 | --- | DSHGNVIE-SR   | ----- | PDGI | GAPKIE     | --- | KPL | ----- |
| P.vulgarisERV-A1      | 110 | --- | DSHGNVIE-TR   | ----- | QEGI | GAPKIE     | --- | KPL | ----- |
| G.maxERV-A1           | 110 | --- | DSHGNVIE-TR   | ----- | QEGI | GAPKIE     | --- | KPL | ----- |
| G.maxERV-A2           | 110 | --- | DSRGNVIE-TR   | ----- | QEGI | GAPKIE     | --- | KPL | ----- |
| T.cacaoERV-A1         | 110 | --- | DAHGNVIE-SR   | ----- | QDGI | GAPKIE     | --- | KPL | ----- |
| P.trichocarpaERV-A1   | 110 | --- | DFHGNVIE-AR   | ----- | QDGI | GAPKIE     | --- | KPL | ----- |
| P.trichocarpaERV-A2   | 110 | --- | DSHGNVIE-SR   | ----- | QDGI | GAPKIE     | --- | KPL | ----- |
| C.reinhardtiiERV-B    | 113 | --- | DKAGNITGKAIEY | ----- | HTPQ | SQQIWD     | --- |     | ----- |
| V.carteriERV-B        | 111 | --- | DGAGKPTGKAIEY | ----- | HTPQ | SQQIWD     | --- | TGA | ----- |
| C.subellipsoideaERV-B | 112 | --- | NEAGEKIG      | ----- |      |            |     | LGE | ----- |
| K.flaccidumERV-B      | 110 | --- | DSQGRPGI-WQQ  | ----- | VDKI |            | --- | D   | ---   |
| P.patensERV-B         | 111 | --- | HRDGYVLG-SEF  | ----- | VNDI | VEGEHR     | --- | KEE | ----- |
| S.moellendorffiiERV-B | 107 | --- | HKDGHILG-SEY  | ----- | LSDI | VEKEHA     | --- | HDN | ----- |
| S.bicolorERV-B        | 109 | --- | DKYGHITG-TEY  | ----- | LSDI | VEKGHG     | --- |     | ----- |
| Z.maysERV-B           | 109 | --- | DKYGHITG-TEY  | ----- | LSDI | VEKGHG     | --- |     | ----- |
| B.distachyonERV-B     | 109 | --- | DKYGTITG-TEY  | ----- | LSDI | VEKE       | --- | HGA | ----- |
| O.sativaERV-B         | 109 | --- | DKYGHITG-TEY  | ----- | LNDI | VEKE       | --- | HGT | ----- |
| B.rapaERV-B2          | 109 | --- | NSHGHTIG-TEY  | ----- | ISDI | VEKEHD     | --- | HSS | ----- |
| B.rapaERV-B1          | 109 | --- | NSHGHTIG-TEY  | ----- | ISDI | VEKEHD     | --- | HSS | ----- |
| E.salsugineumERV-B    | 109 | --- | NSHGHTIG-TEY  | ----- | ISDI | VEKEHD     | --- | HST | ----- |
| A.thalianaERV-B       | 109 | --- | NSHGHTIG-TEY  | ----- | ISDI | VEKGHE     | --- | HGH | ----- |
| C.rubellaERV-B        | 109 | --- | NSHGHTIG-TEY  | ----- | ISDI | VEKGHE     | --- | HGH | ----- |
| M.truncatulaERV-B     | 109 | --- | NSYGGITG-TEY  | ----- | ISDI | VEKGHEHDHD | --- | HGT | ----- |
| P.vulgarisERV-B       | 109 | --- | NSDGHITG-TEY  | ----- | ISDI | VEKG       | --- | HTH | ----- |
| G.maxERV-B1           | 109 | --- | NSYGHITG-TEY  | ----- | ISDI | VEKE       | --- | HTN | ----- |
| G.maxERV-B2           | 109 | --- | NSYGHITG-TEY  | ----- | ISDI | VEKEHT     | --- | HKK | ----- |
| C.sativusERV-B        | 109 | --- | NSHGQITG-TEY  | ----- | LSDI | VEKE       | --- | HVD | ----- |
| S.lycopersicumERV-B1  | 109 | --- | NSDGHITG-TEY  | ----- | LSDI | VEKE       | --- |     | ----- |
| S.tuberosumERV-B1     | 109 | --- | NSDGHITG-TEY  | ----- | LSDI | VEKEHK     | --- | HDD | ----- |
| S.lycopersicumERV-B2  | 109 | --- | NSDGHITG-TEY  | ----- | LSDI | VEKE       | --- | HEA | ----- |
| S.tuberosumERV-B2     | 109 | --- | NSDGHITG-TEY  | ----- | LSDI | VEKE       | --- | HEV | ----- |
| P.persicaERV-B        | 109 | --- | NSYGHITG-TEY  | ----- | LSDI | VEREHS     | --- |     | ----- |
| P.trichocarpaERV-B1   | 109 | --- | NSYGHITG-TEY  | ----- | LSDI | VEKE       | --- | HEA | ----- |
| P.trichocarpaERV-B2   | 109 | --- | NSHGHTIG-TEY  | ----- | LSDI | VEKE       | --- | HEA | ----- |
| V.viniferaERV-B       | 109 | --- | NRDGFITG-TEY  | ----- | LSDI | VEKE       | --- | HAD | ----- |
| T.cacaoERV-B          | 109 | --- | NSLGQIVG-TEY  | ----- | LSDI | VEKE       | --- | HAA | ----- |

|                        |     |                                                |                                            |
|------------------------|-----|------------------------------------------------|--------------------------------------------|
| C. subellipsoideaPDI-C | 135 | -----PSVSQDFALPLSKDSFKATLEA-YSIVVNFYAPWCPWCQRL | EPTWEAVTQEVHT                              |
| C. reinhardtiiPDI-C    | 144 | -----IDITVPLSHENFEATLAR-YPIAVINFYAPWCHWCQRL    | EPTWEAATKEVHD                              |
| V. carteriPDI-C        | 135 | EGRFDDEPDIDITVPLSHVNF                          | EATLAR-YPIVVVNFYAPWCHWCQRL                 |
| K. flaccidumPDI-C      | 163 | EGDPPPIKDPGGALPLSEAFD                          | TITKESFPIVMVNFYAPWCPWSQRL                  |
| B. rapaPDI-C1          | 134 | ---ETKEEIPDGSVPLVSSSF                          | DSFSKH-FPLLIVNFNAPWCYWSNRLKPSWEKASSI       |
| B. rapaPDI-C2          | 134 | ---EIKQEPDGAIQLTNG                             | GFQSLSHH-FPLLIVNFNAPWCYWSNRLKPSWEKAATI     |
| E. salsugineumPDI-C1   | 134 | ---ESKEEFPDGAIPLTS                             | SFESYSHH-FPILVNFYAPWCYWSNRLKPSWEKAANI      |
| A. thalianaPDI12       | 134 | ---ETKEEFPDGAIPLTS                             | SFESLSSH-FPILVNFNAPWCYWSNRLKPSWEKAANI      |
| C. rubellaPDI-C1       | 134 | ---ETKEEFPDGAIPLTS                             | SFESLSSH-FPILVNFNAPWCYWSNRLKPSWEKAANI      |
| B. rapaPDI-C5          | 134 | ---EHHDDNTYAAIPLS                              | GGTFDKISHH-FPILVNFYAPWCYWSNRLKPSWEKAAEITRQ |
| A. thalianaPDI13       | 134 | ---EDHGDNSTYADIPLT                             | GAAF                                       |
| C. rubellaPDI-C3       | 134 | ---EDHEENTYIDIPLT                              | GATFEKFKHH-FQILVNFYAPWCYWSNRLKPSWEKASQITRE |
| B. rapaPDI-C6          | 134 | ---EDHGNNTYAAIPLT                              | GATFDKFSHH-FQILVNFYAPWCYWSNRLKPSWEKAAEITRQ |
| E. salsugineumPDI-C3   | 134 | ---EDHHENNSYAAIPLT                             | GATFDKFSHH-FPILVNFYAPWCYWSNRLKPSWEKAAEITRQ |
| S. bicolorPDI-C        | 134 | ---DVEEDHVDGAFSLSSRN                           | DFDSFSHQ-YPVLVNFYAPWCYWSNRLKPSWEKAKI       |
| Z. maysPDI-C           | 134 | ---DVEEDHVDGAFSLSSRN                           | DFDSFSHQ-YPVLVNFYAPWCYWSNRLKPSWEKAKI       |
| B. distachyonPDI-C     | 134 | ---DVEEYHADGVALSSRN                            | DFDSFSHQ-YPILVNFYAPWCYWSNRLKPSWEKAKI       |
| O. sativaPDI-C         | 134 | ---DVEENHDDGSVPLSSRN                           | DFDSFSHQ-YPVLVNFYAPWCYWSNRLKPSWEKAKI       |
| B. rapaPDI-C4          | 134 | ---ESAEEVLVDGAFSLSSRN                          | DFDTFLHQ-YPIVNFYAPWCYWSNRLKPSWEKAKI        |
| A. thalianaPDI7        | 134 | ---ETGEEIVEDSVPLT                              | GRNDFTFTHQ-FPILVNFYAPWCYWSNRLKPSWEKAKI     |
| C. rubellaPDI-C2       | 134 | ---ETGEEVAEDSVSLT                              | GRNDFTFTHQ-FPILVNFYAPWCYWSNRLKPSWEKAKI     |
| B. rapaPDI-C3          | 134 | ---AGEEVVEDSVSLT                               | SRNDFTLHQ-FPISVNFYAPWCYWSNRLKPSWEKAKI      |
| E. salsugineumPDI-C2   | 134 | ---EAGEELVEDSVSLT                              | GRNDFTLHQ-FPISVNFYAPWCYWSNRLKPSWEKAKI      |
| S. lycopersicumPDI-C   | 134 | ---EDDEEYGEVSVLN                               | GHSFDRVTHH-FPILVNFYAPWCYWSNRLKPSWEKAANI    |
| S. tuberosumPDI-C      | 134 | ---EDDEEYGEVSVLN                               | GHSFDRVTHH-FPILVNFYAPWCYWSNRLKPSWEKAANI    |
| M. truncatulaPDI-C1    | 134 | ---KVDDDESLEGAFVFTS                            | NNFDKYSHQ-FPITAVNFYAPWCYWSNRLKPSWEKAKI     |
| P. vulgarisPDI-C1      | 134 | ---EQHEESIGGALELTT                             | DNFDKYAHQ-FPITVNFYAPWCYWSNRLKPSWEKAKI      |
| G. maxPDI-C1           | 134 | ---EVNEESVEGVSVLKT                             | QNF                                        |
| G. maxPDI-C2           | 134 | ---EVNEESVEGVSVLTT                             | QNF                                        |
| M. truncatulaPDI-C2    | 134 | ---EVDTFDFVEGSLPLT                             | SQHF                                       |
| P. vulgarisPDI-C2      | 134 | ---EVDGESVEGVSFLT                              | THNFDKYAHQ-FPITVNFYAPWCYWSNRLKPSWEKAKI     |
| G. maxPDI-C3           | 134 | ---EVDEESVEGVSFLT                              | THNFDKYVHQ-FPVTIVNFYAPWCYWSNRLKPSWEKAKI    |
| G. maxPDI-C4           | 134 | ---EVDEESVEGVSFLT                              | THNFDKYVHQ-FPITAVNFYAPWCYWSNRLKPSWEKAKI    |
| V. viniferaPDI-C       | 134 | ---ETDEEYSEGSASLT                              | QNFYKYSHQ-HAILVNFYAPWCYWSNRLKPSWEKAANI     |
| C. sativusPDI-C        | 134 | ---EVDEEANEGSVALT                              | TRNFDRYANQ-HPILVNFYAPWCYWSNRLKPSWEKAKI     |
| P. persicaPDI-C        | 134 | ---GDEYGGDGSVIT                                | ARTFEKFTHQ-HPILVNFYAPWCYWSNRLKPSWEKAANI    |
| T. cacaoPDI-C          | 134 | ---EVDEETVEGVSPLN                              | GVSF                                       |
| P. trichocarpaPDI-C1   | 134 | ---EVDEEGEGSVSLKA                              | HNF                                        |
| P. trichocarpaPDI-C2   | 134 | ---EVHEEGSEGSVSLKA                             | HNF                                        |
| S. moellendorffiiPDI-C | 134 | -----DDHEGEGAHVLT                              | SSTFDEYARR-YSVLVNFYAPWCYWSNRLKPSWEKAKI     |
| P. patensPDI-C         | 136 | VGEDMFEHLGEGAVELN                              | KNTFDVYQQ-FSVLVNFYAPWCYWSNRLKPSWEKAKI      |
| C. reinhardtiiERV-A    | 144 | AAGGAPAGGAAGAAGAA                              | CGAAGGAGGG-ENATALANGCGS                    |
| V. carteriERV-A        | 138 | -----NCTENSTATPV                               | -----CGSCYGAEDRQGDCCNTCEVRA                |
| C. subellipsoideaERV-A | 134 | -----LHKAN                                     | -----ETECGSCYGA-APDEECCNNSCEVRA            |
| K. flaccidumERV-A      | 138 | -----ESEGG                                     | -----PAYCGSCYGAENAEDCCNTCEVRE              |
| B. distachyonERV-A3    | 133 | -----QKHGGRLD                                  | ---KG-----EQYCGTCYGAESDEQCCNSCEVRE         |
| O. sativaERV-A3        | 133 | -----QKHGGRLS                                  | ---KG-----EYCGTCYGAESDEQCCNSCEVRE          |
| Z. maysERV-A3          | 133 | -----QKHGGRLD                                  | ---KG-----EQYCGTCYGAESDEQCCNSCEVRE         |
| Z. maysERV-A2          | 133 | -----QKHGGRLD                                  | ---KG-----EQYCGTCYGAESDEQCCNSCEVRE         |
| S. bicolorERV-A3       | 133 | -----QKHGGRLD                                  | ---KG-----EQYCGTCYGAESDEQCCNSCEVRE         |
| P. patensERV-A1        | 135 | -----QKHGGRLE                                  | ---HN-----ETYCGSCYGAETDEQCCNSCEVRE         |
| P. patensERV-A4        | 133 | -----QKHGGRLE                                  | ---HN-----ETYCGSCYGAESSDDECCNSCEVRE        |
| P. patensERV-A2        | 133 | -----QKHGGRLE                                  | ---HN-----ETYCGSCYGAESSDDECCNSCEVRE        |
| P. patensERV-A3        | 133 | -----QKHGGRLE                                  | ---DH-----ETYCGSCYGAESSDQCCNSCEVRE         |
| S. bicolorERV-A2       | 132 | -----QKHGGRLD                                  | ---HN-----EYCGSCYGAETDDQCCNSCEVRE          |
| B. distachyonERV-A2    | 132 | -----QKHGGRLD                                  | ---HN-----EAYCGSCYGAESDDQCCNSCEVRE         |
| O. sativaERV-A2        | 132 | -----QKHGGRLD                                  | ---HN-----EYCGSCYGAESDDQCCNSCEVRE          |
| S. moellendorffiiERV-A | 133 | -----QKHGGRLE                                  | ---HN-----ETYCGSCYGAEQSDDECCNSCEVRE        |
| C. sativusERV-A3       | 133 | -----QKHGGRLE                                  | ---HN-----ETYCGSCYGAESDDQCCNSCEVRE         |
| M. truncatulaERV-A2    | 133 | -----QKHGGRLE                                  | ---HD-----EKYCGSCYGAESDDHCCNSCEVRE         |
| P. vulgarisERV-A2      | 133 | -----QKHGGRLG                                  | ---HD-----EKYCGSCYGAETDEQCCNSCEVRE         |
| G. maxERV-A3           | 133 | -----QKHGGRLG                                  | ---HD-----EKYCGSCYGAESDEHCCNSCEVRE         |
| G. maxERV-A4           | 133 | -----QKHGGRLG                                  | ---HD-----EKYCGSCYGAESDEHCCNSCEVRE         |
| S. lycopersicumERV-A2  | 133 | -----QRHGGRL                                   | ---HN-----ETYCGSCYGAETADDECCNSCEVRE        |
| S. tuberosumERV-A2     | 133 | -----QRHGGRL                                   | ---HN-----ETYCGSCYGAETADDECCNSCEVRE        |
| P. persicaERV-A2       | 133 | -----QRHGGRL                                   | ---HN-----EKYCGSCYGAEMSDDDCCNSCEVRE        |
| T. cacaoERV-A2         | 133 | -----QRHGGRL                                   | ---HN-----ETYCGSCYGAEQSDDDCCNSCEVRE        |
| P. trichocarpaERV-A3   | 133 | -----QKHGGRLE                                  | ---HN-----EYCGSCYGAEMSDHCCNSCEVRE          |
| P. trichocarpaERV-A4   | 133 | -----QSHGGRLG                                  | ---HN-----EYCGSCYGAEMSHDDCCNTCEVRE         |
| C. sativusERV-A1       | 133 | -----QKHGGRLK                                  | ---QN-----ETYCGSCYGAESG-EDCCNSQDVE         |
| V. viniferaERV-A2      | 133 | -----QRHGGRL                                   | ---HN-----EKYCGSCYGAETDDCCNSCEVRE          |
| B. rapaERV-A4          | 129 | -----QKHGGRL                                   | ---DN-----EKYCGSCYGAETDDACCNSCEVRE         |
| B. rapaERV-A3          | 129 | -----QKHGGRL                                   | ---HN-----ETYCGSCYGAETDDTCCNSCEVRE         |
| E. salsugineumERV-A2   | 133 | -----QKHGGRL                                   | ---HN-----ETYCGSCYGAEMTDEACCNSCEVRE        |

|                       |     |                    |     |                               |                     |
|-----------------------|-----|--------------------|-----|-------------------------------|---------------------|
| A.thalianaERV-A2      | 133 | -----QKHGGRL       | HN  | -----ETYCGSCFGAEAS            | DDACCNSCEEVRE       |
| C.rubellaERV-A2       | 133 | -----QKHGGRL       | HN  | -----ETYCGSCFGAELS            | DDACCNSCEEVRE       |
| B.rapaERV-A2          | 133 | -----QKHGGRL       | HN  | -----ETYCGSCYGAEAS            | DDECCNSCEEVRE       |
| E.salsugineumERV-A3   | 133 | -----QRHGGRL       | HN  | -----ETYCGSCYGAEAT            | DDECCNSCEEVGE       |
| B.distachyonERV-A1    | 133 | -----QMHHGRL       | HN  | -----ETYCGSCYGAEEP            | GEQCCNSCEDVRE       |
| O.sativaERV-A1        | 133 | -----QRHGGRL       | HN  | -----ETYCGSCYGAEES            | DEQCCNSCEDVRE       |
| S.bicolorERV-A1       | 133 | -----QHHGGRL       | HN  | -----ETYCGSCYGAQES            | DGQCCNSCEDVRE       |
| Z.maysERV-A1          | 133 | -----QHHGGRL       | HN  | -----ETYCGSCYGAQES            | DDQCCNTCEDVRE       |
| S.lycopersicumERV-A1  | 133 | -----QRHGGRL       | HN  | -----ETYCGSCYGAEGS            | DDHCCNTCEDVRE       |
| S.tuberosumERV-A1     | 133 | -----QRHGGRL       | HN  | -----ETYCGSCYGSEGS            | DDHCCNTCEDVRE       |
| B.rapaERV-A1          | 133 | -----QKHGGRL       | HN  | -----ETYCGSCYGAEAE            | EHDCCNSCEDVRE       |
| E.salsugineumERV-A1   | 133 | -----QKHGGRL       | HK  | -----ETYCGSCYGAEAE            | EHDCCNSCEDVRE       |
| A.thalianaERV-A1      | 133 | -----QKHGGRLG      | HN  | -----ETYCGSCYGAEAE            | EHDCCNSCEDVRE       |
| C.rubellaERV-A1       | 133 | -----QKHGGRL       | HN  | -----ETYCGSCYGAEAE            | EHDCCNSCEDVRE       |
| V.viniferaERV-A1      | 133 | -----QRHGGRL       | HN  | -----ETYCGSCYGAEAS            | DDCCNNCEVRE         |
| C.sativusERV-A2       | 133 | -----QRHGGRL       | HN  | -----ETYCGSCFGAESAD           | DDCCNSCEEVRE        |
| M.truncatulaERV-A1    | 133 | -----QRHGGRL       | HN  | -----ETYCGSCYGAEAS            | DDECCNSCEEVRE       |
| P.persicaERV-A1       | 133 | -----QRHGGRL       | HN  | -----ETYCGSCYGAEAA            | DEDCCNSCEDVRE       |
| P.vulgarisERV-A1      | 133 | -----QRHGGRL       | HN  | -----ETYCGSCFGAEAS            | DDCCNSCEDVRE        |
| G.maxERV-A1           | 133 | -----QRHGGRL       | HN  | -----ETYCGSCYGAEES            | DDCCNSCEDVRE        |
| G.maxERV-A2           | 133 | -----QRHGGRL       | HN  | -----ETYCGSCYGSEVS            | DDCCNSCEDVRE        |
| T.cacaoERV-A1         | 133 | -----QRHGGRL       | HN  | -----ETYCGSCYGAEAS            | DDCCNSCEDVRE        |
| P.trichocarpaERV-A1   | 133 | -----QRHGGRL       | HN  | -----ETYCGSCYGAEAS            | DEDCCNSCEDVRE       |
| P.trichocarpaERV-A2   | 133 | -----QRHGGRL       | HN  | -----ETYC-----                | DEDCCNSCEEVRE       |
| C.reinhardtiiERV-B    | 135 | -----TGCQQL        |     | -----VSVNIQ                   | EAMOHLDVDMED        |
| V.carteriERV-B        | 136 | -----EQLVSVNIQ     | EA  | -----                         | MOHLVDMED           |
| C.subellipsoideaERV-B | 123 | -----              |     | -----YIPRRRWGFMGKP            | -RQEVMEVNO          |
| K.flaccidumERV-B      | 130 | -----TAHNEAHA      | EDT | -----TEHDFALANARRAAQADANKQVED | IKAKA               |
| P.patensERV-B         | 135 | -----PKADKKDE      | HK  | -----                         | DGDRKKDPQKVINEVKK   |
| S.moellendorffiiERV-B | 131 | -----              |     | -----LTGT                     | HSHEELRSVAVKVVNEINK |
| S.bicolorERV-B        | 130 | -----AHHDHDHGQEHHD | HD  | -----EQKKPEQTFNEEA            | EAKMIKSVKQ          |
| Z.maysERV-B           | 130 | -----AHHDHDHD      | HD  | -----HHDEQKKHEQTFNEEA         | EAKMIKSVKQ          |
| B.distachyonERV-B     | 131 | -----HHHDNGHE      | HH  | -----DEEKKPEHTFNEDADK         | MVKSVRQ             |
| O.sativaERV-B         | 131 | -----HNHDHDHE      | HE  | -----DEQKKQEHTFNEDA           | EAKMVKSVKQ          |
| B.rapaERV-B2          | 133 | -----HKHDEHKN      |     | -----ETDALNLLGF               | DEAAETMIKVKQ        |
| B.rapaERV-B1          | 133 | -----HKHDKKE       | HK  | -----NETEAVNTLGF              | DEAAETMIKVKQ        |
| E.salsugineumERV-B    | 133 | -----HKHEHKNE      |     | -----TEALNVLGF                | DQAAETMIKVKQ        |
| A.thalianaERV-B       | 133 | -----SPHKHDKKE     | HK  | -----NETETEALNILGF            | DQAAETMIKVKQ        |
| C.rubellaERV-B        | 133 | -----SSHKHDKKE     | HK  | -----NETEIE TLNSLGF           | DQAAETMIKVKQ        |
| M.truncatulaERV-B     | 137 | -----HKHDDSKD      | HH  | -----EHSEQKVHLQTF             | DEATEINTIKVKKE      |
| P.vulgarisERV-B       | 131 | -----HKHDDHKD      | HD  | -----EHSEQKIHLQNL             | DESTENI IKVKKE      |
| G.maxERV-B1           | 131 | -----QEHDNDKDHHDH  | HH  | -----EHSEQKIHLQNL             | DESTENI IKVKKE      |
| G.maxERV-B2           | 133 | -----HDDNKN        | HE  | -----HSEQKIHLQNL              | DESTENI IKVKKE      |
| C.sativusERV-B        | 131 | -----HKHDDHDKKEKDH |     | -----PHIHGFDQAAENL            | VKVKQ               |
| S.lycopersicumERV-B1  | 128 | -----HKHDDHKD      | HH  | -----DDSDNKTHMQGF             | DQEAENLIKVKQ        |
| S.tuberosumERV-B1     | 133 | -----SDNKTH        |     | -----MQGF                     | DQDAENLIKVKQ        |
| S.lycopersicumERV-B2  | 131 | -----HKHDVHKE      | HH  | -----EDSDKIHLQGI              | DEESQNMIKVKQ        |
| S.tuberosumERV-B2     | 131 | -----HKHDHKE       | HH  | -----EDSDKIHLQGI              | DEESQNMIKVKQ        |
| P.persicaERV-B        | 130 | -----HKHDDSKD      | HH  | -----EDKDQEIHLQGF             | DQAAEDLIKRVKH       |
| P.trichocarpaERV-B1   | 131 | -----HNHDHNDK      | HH  | -----EDSHAKQHTHGF             | DDAAETMVKVKQ        |
| P.trichocarpaERV-B2   | 131 | -----HNHDHDKD      | HH  | -----KDSHEEQHTHGF             | DDAAETMIKVKQ        |
| V.viniferaERV-B       | 131 | -----HKHDHNDK      | HH  | -----GDSQKLHHSFDQDAEN         | NMVKVKQ             |
| T.cacaoERV-B          | 131 | -----HKHDDEKE      | HH  | -----DDSDKLHALGF              | DQEAENMIKVKQ        |

|                        |     |                                                   |                   |
|------------------------|-----|---------------------------------------------------|-------------------|
| C. subellipsoideaPDI-C | 189 | KY-PDADGRIRFAKVDCTTEVDLCREHQITGFPSIRVFRSGHDEVNVHG | VKEHEHSYRGDR      |
| C. reinhardtiiPDI-C    | 194 | KY-PEWDRVRFVAKVDCTAEVDLCRQHFIQGFPSIRVFRKGHDDIYIG  | MHEHEASYMGDR      |
| V. carteriPDI-C        | 194 | KY-PEWDRIRFAKVDCTQEMELCRTHFIQGFPSIRVFRKGHDDIYIG   | MHEHEASYMGDR      |
| K. flaccidumPDI-C      | 223 | KYDQVNVNQIILLAKVDCTVEVALCRKHHVQGFPSIRIFRSGQDVR    | AAQGHHDHESYGGDR   |
| B. rapaPDI-C1          | 190 | KYNPETDGRVLLGSVDCTEEAELCRNHHIQGYPSIRIFRKGSDLKED   | HGHHEHESYGGDR     |
| B. rapaPDI-C2          | 190 | RYNPDTDGRVLLGSVDCTEFPALCRNHHIQGYPSIRIFRKGNDLKED   | HGHHEHESYGGDR     |
| E. salisugineumPDI-C1  | 190 | RYPETDGRVLLGSVDCTEEAELCRNHHIQGYPSIRIFRKGSDLRED    | HGHHEHESYGGDR     |
| A. thalianaPDI12       | 190 | RYPETDGRVLLGSVDCTEFPALCRNHHIQGYPSIRIFRKGSDLRED    | HGHHEHESYGGDR     |
| C. rubellaPDI-C1       | 190 | KYDPETDGRVLLGSVDCTEFPALCRNHHIQGYPSIRIFRKGSDLRED   | HGHHEHESYGGDR     |
| B. rapaPDI-C5          | 190 | KYGPENDGRVLLGSVDCTEETPLCTKYYHIQGYPSIRIFHNGSDLR    | CDGHQEHDSYHGDR    |
| A. thalianaPDI13       | 191 | RYNPGTDDRVLGSDVCTEETPLCRNHHIQGYPSIRIFRKGSDLRED    | HGHHEHESYGGDR     |
| C. rubellaPDI-C3       | 190 | RYPETDDRVLGSDVCTKESTLCKSNHHIQGYPSIRIFRKGSDLRDD    | HGHHDHESYGGDR     |
| B. rapaPDI-C6          | 190 | RYNPETDGRVLLGSVDCTEETTLCKNHHIQGYPSIRIFRKGSDLKED   | HGHHEHESYHGDR     |
| E. salisugineumPDI-C3  | 191 | KYDPEDDGRVLLGSVDCTEETPLCRNHHIQGYPSIRIFRKGSDLRED   | HGHHEHESYGGDR     |
| S. bicolorPDI-C        | 190 | RYPEDMDGRILLGKVDCTEVEGLCRNHHIQGYPSIRVFRKSGDIKEN   | QGHHDHESYGER      |
| Z. maysPDI-C           | 190 | RYPEDMDGRILLGKVDCTEVEGLCRNHHIQGYPSIRVFRKSGDIKEN   | QGHHDHESYGER      |
| B. distachyonPDI-C     | 190 | RYPEDMDGRILLAKVDCTEVEGLCRNHHIQGYPSIRIFRKGSDMKEN   | QGHHDHESYGER      |
| O. sativaPDI-C         | 190 | RYPEDMDGRILLAKVDCTEVEGLCRNHHIQGYPSIRIFRKGSDMKEN   | QGHHDHESYGGDR     |
| B. rapaPDI-C4          | 190 | RYPEDMDGRVILAKVDCTEQEADLCRHHIQGYPSIRIFRKGSDLRDD   | NAHHDHESYGGDR     |
| A. thalianaPDI7        | 190 | RYPEDMDGRVILAKVDCTEQEADLCRHHIQGYPSIRIFRKGSDLRDD   | NAHHDHESYGGDR     |
| C. rubellaPDI-C2       | 190 | RYPEDMDGRVIVAKVDCTEQEADLCRHHIQGYPSIRIFRKGSDLRDD   | NAHHDHESYGGDR     |
| B. rapaPDI-C3          | 189 | RYPEDMDGRVILAKVDCTEQEADLCRHHIQGYPSIRIFRKGSDLK     | DNHHDHESYGGDR     |
| E. salisugineumPDI-C2  | 190 | RYPEDMDGRVILAKVDCTEQEADLCRHHIQGYPSIRIFRKGSDLRDD   | NAHHDHESYGGDR     |
| S. lycopersicumPDI-C   | 190 | RYPEDMDGRILVAKVDCTEVEGLCRNHHIQGYPSIRIFRKGSDVRDD   | HGHHDHESYGGDR     |
| S. tuberosumPDI-C      | 190 | RYPEDMDGRILVAKVDCTEVEGLCRNHHIQGYPSIRIFRKGSDVRDD   | HGHHDHESYGGDR     |
| M. truncatulaPDI-C1    | 190 | RYPEDMDGRILLGKVDCTKEADLCRHHIQGYPSIRIFRKGSDVRS     | DHGHHEHESYGGDR    |
| P. trichocarpaPDI-C1   | 190 | RYPEDMDGRIVMAKVDCTEQEADLCRHHIQGYPSIRIFRKGSDVRS    | DHGHHDHESYGGDR    |
| G. maxPDI-C1           | 190 | RYPEDMDGRILLGRVDCTEDGDLCRSHHIQGYPSIRIFRKGSDVRS    | SNHGHHDHESYGGDR   |
| G. maxPDI-C2           | 190 | RYPEDMDGRILLGRVDCTEDGDLCRSHHIQGYPSIRIFRKGSDVRS    | DHGHHDHESYGGDR    |
| M. truncatulaPDI-C2    | 190 | RYPEDMDGRILLAKVDCTEQEADLCRHHIQGYPSIRIFRKGSDVRS    | DHGHHEHESYGGDR    |
| P. vulgarisPDI-C2      | 190 | RYPEDMDGRILMGKVDCTEQEADLCRHHIQGYPSIRIFRKGSDLRSE   | HGHHEHESYGGDR     |
| G. maxPDI-C3           | 190 | RYPEDMDGRILLAKVDCTEQEADLCRHHIQGYPSIRIFRKGSDLRSE   | HGHHEHESYGGDR     |
| G. maxPDI-C4           | 190 | RYPEDMDGRILLAKVDCTEQEADLCRHHIQGYPSIRIFRKGSDLRSE   | HGHHEHESYGGDR     |
| V. viniferaPDI-C       | 190 | RYPEDMDGRIVMAKVDCTEVEGLCRHHIQGYPSIRIFRKGSDVRDD    | HGHHDHESYGGDR     |
| C. sativusPDI-C        | 190 | RYPEDMDGRILLAKVDCTEQEADLCRHHIQGYPSIRIFRKGSDVRDD   | HGHHDHESYGGDR     |
| P. persicaPDI-C        | 189 | RYPEDMDGRILLAKVDCTEVEGLCRNHHIQGYPSIRIFRKGSDVRDD   | HGHHDHESYGGDR     |
| T. cacaoPDI-C          | 190 | RYPEDMDGRILLAKVDCTEVEGLCRHHIQGYPSIRIFRKGSDLRDD    | HGHHDHESYGGDR     |
| P. trichocarpaPDI-C1   | 190 | RYPEDMDGRILLAKVDCTEVEGLCRNHHIQGYPSIRIFRKGSDLRDD   | HGRHDHESYGGDR     |
| P. trichocarpaPDI-C2   | 190 | RYPEDMDGRILLAKVDCTEVEGLCRNHHIQGYPSIRIFRKGSDLRDD   | HGHHDHESYGGDR     |
| S. moellendorffiiPDI-C | 188 | KYHPD-TGRILLGKVDCTDNNDLCRHHIQGFPSIRIFHKGHD        | LKDEHGHHEHDSYGGDR |
| P. patensPDI-C         | 195 | KYNPEMDGRILLAKVDCTVNVLECRSHHIQGYPSIRIFRKGSDVRDE   | HGRHDHESYGGDR     |
| C. reinhardtiiERV-A    | 203 | AYRRKGWALSNDHTEQCAHDLYTEA-----                    | IKKQAGE-----      |
| V. carteriERV-A        | 172 | AYRRKGWALANVDHTEQCAHDLYTES-----                   | IKKQAGE-----      |
| C. subellipsoideaERV-A | 164 | AYRRKGWGFDPQQLSQCAKEGFVEK-----                    | LKQAGE-----       |
| K. flaccidumERV-A      | 169 | AYRRKGWAFSNAELTEQCSREGFVEK-----                   | LKQAGE-----       |
| B. distachyonERV-A3    | 169 | AYKKKGWALTNPDLTDQCAREDFVER-----                   | VKTQAGE-----      |
| O. sativaERV-A3        | 169 | AYKKKGWALTNPDLTDQCAREDFVER-----                   | VKTQAGE-----      |
| Z. maysERV-A3          | 169 | AYKKKGWALTNPDLTDQCAREDFIDR-----                   | VKTQAGE-----      |
| Z. maysERV-A2          | 169 | AYKKKGWALTNPDLTDQCAREDFVER-----                   | VKTQAGE-----      |
| S. bicolorERV-A3       | 169 | AYKKKGWALTNPDLTDQCAREDFVER-----                   | VKTQAGE-----      |
| P. patensERV-A1        | 171 | AYRRKGWALNPNLTDQCKREGFVQK-----                    | IKDEAGE-----      |
| P. patensERV-A4        | 169 | AYRRKGWALINIDLTDQCHREGFIER-----                   | VKEEAGE-----      |
| P. patensERV-A2        | 169 | AYRRKGWALTADLTDQCHREGFIER-----                    | VKEEAGE-----      |
| P. patensERV-A3        | 169 | AYRRKGWALTNTDLTDQCHREGFIER-----                   | IKKEAGE-----      |
| S. bicolorERV-A2       | 168 | AYRRKGWALNPNLTDQCKREGFVQK-----                    | LKDEAGE-----      |
| B. distachyonERV-A2    | 168 | AYRRKGWALTNPDLTDQCKREGFVQK-----                   | LKDEAGE-----      |
| O. sativaERV-A2        | 168 | AYRRKGWALTNIETDQCKREGFVQK-----                    | LKDEAGE-----      |
| S. moellendorffiiERV-A | 169 | AYRRKGWALHNADLTDQCKREGWLTQK-----                  | IKKEAGE-----      |
| C. sativaERV-A3        | 169 | AYRRKGWALTNPDLTDQCKREGFVQK-----                   | VKDEAGE-----      |
| M. truncatulaERV-A2    | 169 | AYRRKGWALTNDLTDQCKREGFVQK-----                    | VKDEAGE-----      |
| P. vulgarisERV-A2      | 169 | AYRRKGWALSNDLTDQCKREGFVQK-----                    | VKDEAGE-----      |
| G. maxERV-A3           | 169 | AYRRKGWAMTNDLTDQCKREGFVQK-----                    | VKDEAGE-----      |
| G. maxERV-A4           | 169 | AYRRKGWAMTNDLTDQCKREGFVQK-----                    | VKDEAGE-----      |
| S. lycopersicumERV-A2  | 169 | AYRRKGWMTNPDLTDQCKREGFVQK-----                    | IKDEAGE-----      |
| S. tuberosumERV-A2     | 169 | AYRRKGWMTNPDLTDQCKREGFVQK-----                    | IKDEAGE-----      |
| P. persicaERV-A2       | 169 | AYRRKGWALTADLTDQCKREGFVQK-----                    | IKDEAGE-----      |
| T. cacaoERV-A2         | 169 | AYRRKGWALTNDLTDQCKREGFVQK-----                    | VKDEAGE-----      |
| P. trichocarpaERV-A3   | 169 | AYRRKGWALTNDLTDQCKREGFVQK-----                    | IKDEAGE-----      |
| P. trichocarpaERV-A4   | 169 | AYRRKGWAMTNDLTDQCKREGFVQK-----                    | IKDEAGE-----      |
| C. sativusERV-A1       | 167 | AYRRKGWALSHPDLDQCKREGFVQK-----                    | VKDEAGE-----      |
| V. viniferaERV-A2      | 169 | AYRRKGWMTNPDLTDQCKREGFVQK-----                    | VKDEAGE-----      |
| B. rapaERV-A4          | 165 | AYRRKGWALSNDLTDQCKREGFVQK-----                    | VKDEAGE-----      |
| B. rapaERV-A3          | 165 | AYRRKGWALSNDLTDQCKREGFVQK-----                    | VKDEAGE-----      |
| E. salisugineumERV-A2  | 169 | AYRRKGWALSNDLTDQCKREGFVQK-----                    | VKDEAGE-----      |

|                       |     |                             |       |       |         |
|-----------------------|-----|-----------------------------|-------|-------|---------|
| A.thalianaERV-A2      | 169 | AYRKKGWALSDPESIDQCKREGFVQK  | ----- | VKDEE | GE----- |
| C.rubellaERV-A2       | 169 | AYRKKGWALSDPESIDQCKREGFVQK  | ----- | VKDEE | GE----- |
| B.rapaERV-A2          | 169 | AYRKKGWAMTDPDIDQCKREGFVQK   | ----- | VKDEE | GE----- |
| E.salsugineumERV-A3   | 169 | AYRKKGWAMSDPEIDQCKREGFVQK   | ----- | VKDEE | GE----- |
| B.distachyonERV-A1    | 169 | AYRKKGWGVSNPDSIDQCKREGFLO   | ----- | IKDEE | GE----- |
| O.sativaERV-A1        | 169 | AYRKKGWGVSNPDLIDQCKREGFLO   | ----- | IKDEE | GE----- |
| S.bicolorERV-A1       | 169 | AYRKKGWGVSNPDLIDQCKREGFLO   | ----- | IKDEE | GE----- |
| Z.maysERV-A1          | 169 | AYRKKGWGVSNPDLIDQCKREGFLO   | ----- | IKDEE | GE----- |
| S.lycopersicumERV-A1  | 169 | AYRKKGWALTNPDELIDQCKREGFLEK | ----- | IKDEE | GE----- |
| S.tuberosumERV-A1     | 169 | AYRKKGWALTNPDELIDQCKREGFLEK | ----- | IKDEE | GE----- |
| B.rapaERV-A1          | 169 | AYRKKGWGVTNPDLIDQCKREGFLO   | ----- | VKDEE | GE----- |
| E.salsugineumERV-A1   | 169 | AYRKKGWGVTNPDLIDQCKREGFLO   | ----- | VKDEE | GE----- |
| A.thalianaERV-A1      | 169 | AYRKKGWGVTNPDLIDQCKREGFLO   | ----- | VKDEE | GE----- |
| C.rubellaERV-A1       | 169 | AYRKKGWGVTNPDLIDQCKREGFLO   | ----- | VKDEE | GE----- |
| V.viniferaERV-A1      | 169 | AYRKKGWAMSNPDLIDQCKREGFLO   | ----- | IKDEE | GE----- |
| C.sativusERV-A2       | 169 | AYRKKGWALSNPDLIDQCKREGFLO   | ----- | IKDEE | GE----- |
| M.truncatulaERV-A1    | 169 | AYRKKGWALSSPDSIDQCKREGFLE   | ----- | IKDEE | GE----- |
| P.persicaERV-A1       | 169 | AYRKKGWALSNPDLIDQCKREGFLO   | ----- | IKDEE | GE----- |
| P.vulgarisERV-A1      | 169 | AYRKKGWALSNPDLIDQCKREGFLO   | ----- | IKDEE | GE----- |
| G.maxERV-A1           | 169 | AYRKKGWALSNPDLIDQCKREGFLO   | ----- | IKDEE | GE----- |
| G.maxERV-A2           | 169 | AYRKKGWALSNPDLIDQCKREGFLO   | ----- | IKDEE | GE----- |
| T.cacaoERV-A1         | 169 | AYRKKGWALSNPDLIDQCKREGFLO   | ----- | IKDEE | GE----- |
| P.trichocarpaERV-A1   | 169 | AYRKKGWAVTNPDLIDQCKREGFLO   | ----- | IKDEE | GE----- |
| P.trichocarpaERV-A2   | 160 | AYQKKGWAVTNPDLIDQCKREGFLO   | ----- | IKDEE | GE----- |
| C.reinhardtiiERV-B    | 158 | EA-----                     | ----- | DHHE  | -----   |
| V.carteriERV-B        | 156 | EA-----                     | ----- | DHHE  | -----   |
| C.subellipsoideaERV-B | 146 | AM-----                     | ----- | DAHE  | -----   |
| K.flaccidumERV-B      | 168 | AL-----                     | ----- | ANQE  | -----   |
| P.patensERV-B         | 163 | AI-----                     | ----- | DDGE  | -----   |
| S.moellendorffiiERV-B | 154 | AL-----                     | ----- | QDGE  | -----   |
| S.bicolorERV-B        | 165 | AL-----                     | ----- | GNGE  | -----   |
| Z.maysERV-B           | 165 | AL-----                     | ----- | GNGE  | -----   |
| B.distachyonERV-B     | 164 | AL-----                     | ----- | ENGE  | -----   |
| O.sativaERV-B         | 164 | AM-----                     | ----- | ENGE  | -----   |
| B.rapaERV-B2          | 164 | AL-----                     | ----- | ADGE  | -----   |
| B.rapaERV-B1          | 167 | AL-----                     | ----- | ADGE  | -----   |
| E.salsugineumERV-B    | 163 | AL-----                     | ----- | ADGE  | -----   |
| A.thalianaERV-B       | 171 | AL-----                     | ----- | ADGE  | -----   |
| C.rubellaERV-B        | 171 | AL-----                     | ----- | ADGE  | -----   |
| M.truncatulaERV-B     | 172 | AL-----                     | ----- | KNGE  | -----   |
| P.vulgarisERV-B       | 166 | AI-----                     | ----- | KNQE  | -----   |
| G.maxERV-B1           | 169 | AL-----                     | ----- | KNGE  | -----   |
| G.maxERV-B2           | 165 | AL-----                     | ----- | KNGE  | -----   |
| C.sativusERV-B        | 163 | AL-----                     | ----- | EAQ   | -----   |
| S.lycopersicumERV-B1  | 163 | AL-----                     | ----- | AHGE  | -----   |
| S.tuberosumERV-B1     | 156 | AL-----                     | ----- | AHGE  | -----   |
| S.lycopersicumERV-B2  | 165 | AL-----                     | ----- | ADGE  | -----   |
| S.tuberosumERV-B2     | 165 | AL-----                     | ----- | ADGE  | -----   |
| P.persicaERV-B        | 166 | AI-----                     | ----- | ANGE  | -----   |
| P.trichocarpaERV-B1   | 166 | AL-----                     | ----- | ANGE  | -----   |
| P.trichocarpaERV-B2   | 166 | AL-----                     | ----- | ANGE  | -----   |
| V.viniferaERV-B       | 166 | AL-----                     | ----- | ANGE  | -----   |
| T.cacaoERV-B          | 166 | AL-----                     | ----- | ANGE  | -----   |



## BLOCK#3

|                        |     |                                                       |         |
|------------------------|-----|-------------------------------------------------------|---------|
| C. subellipsoideaPDI-C | 248 | TQASLLAFADNLAPSAGQPHHYIRGV-----TRMAKTS                | GCALSGF |
| C. reinhardtiiPDI-C    | 253 | TKDALVAFADSLVPSAGQPHRKLGL-----SAAPKTP                 | GCNLAGF |
| V. carteriPDI-C        | 253 | TKEALVAFADSLVPSAGQPHRKHAA-----SAAPKTP                 | GCNLAGF |
| K. flaccidumPDI-C      | 283 | TEAAITQFADDLATGLQRAHALPGATAQQVPPWGMKDGRLRVVAKAPQSS    | GCQIEGF |
| B. rapaPDI-C1          | 250 | DTDSIVKMDVDELVAPIHPETHKLDLD-GIS-----NKTLLKHKAPVTG     | GCRVEGY |
| B. rapaPDI-C2          | 250 | DTESIVKMDVDELVAPIHPETHKLALDWGIS-----NDTAKLLKKAPVTG    | GCRVEGY |
| E. salsugineumPDI-C1   | 250 | DTDSIVKMDVDELVAPIHPETHKLALD-GIS-----NDTAKNKKAPVTG     | GCRVEGY |
| A. thalianaPDI12       | 250 | DTDSIVKMDVEGLVAPIHPETHKVALD-GKS-----NDTVKHLKKGKAPVTG  | GCRVEGY |
| C. rubellaPDI-C1       | 250 | DTKSIVKMDVDELVAPIHPETHKVALD-GKS-----NDTVKHLKKGKAPVTG  | GCRVEGY |
| B. rapaPDI-C5          | 250 | DTESLVKMDVEELLRPIKK-----FD-GTT-----NHAASRIRKAPVSG     | GCRIEGY |
| A. thalianaPDI13       | 251 | DTDSLVKMDVEELLKPIKKEDHKLALD-GKS-----DNAASTFKKAPVSG    | GCRIEGY |
| C. rubellaPDI-C3       | 250 | DTDSLVKMDVEELLKPIKKEDHKLALD-GKS-----ENAASTVKKAPVSG    | GCRIEGY |
| B. rapaPDI-C6          | 250 | DTESILKMDVEELLKPIKKEDHKLALD-GKT-----DNVVSGLKKGKAPVSG  | GCRIVGY |
| E. salsugineumPDI-C3   | 251 | DTESLLKMDVEELLKPIKKEDHKLPLD-GIS-----VNTASSIKKAPVSG    | GCRIEGY |
| S. bicolorPDI-C        | 250 | DTESLVAAMETYVANI PKEAHVLALD-DKS-----NKTADPAKRPAVSG    | GCRIEGF |
| Z. maysPDI-C           | 250 | DTESLVAAMETYVANI PKEAH-----ALE-DKS-----NKTVDPAKRPAVSG | GCRIEGF |
| B. distachyonPDI-C     | 250 | DTDSLVAAMETYVGNL PKEAHVLALD-DKS-----NKTVDPAKRPAVSG    | GCRVEGF |
| O. sativaPDI-C         | 250 | DTESLVAAMETYVANI PKDAHVLALD-DKS-----NKTVDPAKRPAVSG    | GCRIEGF |
| B. rapaPDI-C4          | 250 | DTESLVKMDVIGLVEPIHLEPHKLALD-DKS-----GNASKTLKK-APSTG   | GCRIEGY |
| A. thalianaPDI7        | 250 | DTESLVKMDVSLVEPIHLEPHNLALD-DKS-----DNSSRTLKK-APSTG    | GCRVEGY |
| C. rubellaPDI-C2       | 250 | DTESLVKMDVSLVEPIHLEPHNLALD-DKS-----GNSSKTLKK-APSTG    | GCRIEGY |
| B. rapaPDI-C3          | 248 | DTESLVKMDVIGLVEPIHLEPHKLALD-DKS-----DNASKTLKK-APSTG   | GCRIEGY |
| E. salsugineumPDI-C2   | 250 | DTESLVKMDVIGLVEPIHLEPQLALD-DKS-----DNASKILKK-APSTG    | GCRIEGY |
| S. lycopersicumPDI-C   | 250 | DTDSLVKMDMEDLVAPIKLDSTITSD-NSS-----TKLETGLKRPAPVTG    | GCRIEGF |
| S. tuberosumPDI-C      | 250 | DTDSLVKMDMEDLVAPIKLDSTQMISSD-NSS-----TKLETGLKRPAPVTG  | GCRIEGF |
| M. truncatulaPDI-C1    | 250 | DTDSLVKTMENILASFPSEYKLALE-DKL-----NVTEDSKRPAPVSG      | GCRIEGY |
| P. vulgarisPDI-C1      | 250 | DTDSLVKTMENLVAASLPESQKSHSG-DKS-----NLASHIKRPAPVSG     | GCRIEGY |
| G. maxPDI-C1           | 250 | DTDSLVKTMENLVAASLPESQKLPLE-DKS-----DVAKNTERPAPVSG     | GCRIDGY |
| G. maxPDI-C2           | 250 | DTDSLVKTMENLVAASLPESQKLPLE-DKS-----NVATNTRKRPAPVSG    | GCRIDGY |
| M. truncatulaPDI-C2    | 250 | DTESLVKTMETLVAASLPESQHLALD-----DKSNGTKRPAPVSG         | GCRVEGY |
| P. vulgarisPDI-C2      | 250 | DTESLVEFMENLVTSLPTASQKPALE-DKS-----NATDNAKRPGPSAG     | GCRIEGY |
| G. maxPDI-C3           | 250 | DTESLVKFMEDLVTSLPTESQKLALE-DKS-----NAADNAKRPGPSAG     | GCRVEGY |
| G. maxPDI-C4           | 250 | DTESLVKFMEDLVTSLPTESQKLALE-DKS-----NASDNAKRPGPSAG     | GCRVEGY |
| V. viniferaPDI-C       | 250 | DTDTLVTTMETLVAPIPLESQRALD-NKS-----DSTADHIKRPAPRTG     | GCRIEGF |
| C. sativusPDI-C        | 250 | DTDSLVKTMEDLIAPLPAGSQKLALE-DKS-----NNETGNVKKRPAPVSG   | GCRIEGY |
| P. persicaPDI-C        | 249 | DTDSLVKTMETLVAPIPVEAQKLALE-GKS-----DNGTDNAKRPAVSG     | GCRIEGY |
| T. cacaoPDI-C          | 250 | DTESLVKTMEEELVAPIPLESQRALD-----DKSNITKRPAPKTG         | GCRIEGY |
| P. trichocarpaPDI-C1   | 250 | DTESLVKTMEEALVAPIAMESQRQALE-HKP-----ENATQHVKKRPAPVSG  | GCRIEGY |
| P. trichocarpaPDI-C2   | 250 | DTDSLVKTMEEGLVAPIAMESQRHALE-HKP-----ENATEHVKKRPAPVSG  | GCRIEGY |
| S. moellendorffiiPDI-C | 247 | DTDSLVKAMEALVPKETT-----LALD-DKT-----NGTVKRPAPVSG      | GCRIEGF |
| P. patensPDI-C         | 255 | DTESLVAFMVELVPPATVDGKQFLEDKSSI-----TVNATIKRPAPKAG     | GCRVEGF |
| C. reinhardtiiERV-A    | 236 | -----                                                 | GCHMWGM |
| V. carteriERV-A        | 205 | -----                                                 | GCHMWGM |
| C. subellipsoideaERV-A | 197 | -----                                                 | GCHMWGS |
| K. flaccidumERV-A      | 202 | -----                                                 | GCNVYGY |
| B. distachyonERV-A3    | 202 | -----                                                 | GCNVHGF |
| O. sativaERV-A3        | 202 | -----                                                 | GCNVHGF |
| Z. maysERV-A3          | 202 | -----                                                 | GCNVLGF |
| Z. maysERV-A2          | 202 | -----                                                 | GCNVHGF |
| S. bicolorERV-A3       | 202 | -----                                                 | GCNVHGF |
| P. patensERV-A1        | 204 | -----                                                 | GCNVYGT |
| P. patensERV-A4        | 202 | -----                                                 | GCNIYGK |
| P. patensERV-A2        | 202 | -----                                                 | GCNIYGK |
| P. patensERV-A3        | 202 | -----                                                 | GCNIYGK |
| S. bicolorERV-A2       | 201 | -----                                                 | GCTIHGF |
| B. distachyonERV-A2    | 201 | -----                                                 | GCNIHGF |
| O. sativaERV-A2        | 201 | -----                                                 | GCSIHGF |
| S. moellendorffiiERV-A | 202 | -----                                                 | GCNIYGS |
| C. sativusERV-A3       | 202 | -----                                                 | GCNIHGS |
| M. truncatulaERV-A2    | 202 | -----                                                 | GCNIHGS |
| P. vulgarisERV-A2      | 202 | -----                                                 | GCNIQGS |
| G. maxERV-A3           | 202 | -----                                                 | GCNIQGS |
| G. maxERV-A4           | 202 | -----                                                 | GCNIQGS |
| S. lycopersicumERV-A2  | 202 | -----                                                 | GCNIHGS |
| S. tuberosumERV-A2     | 202 | -----                                                 | GCNIHGS |
| P. persicaERV-A2       | 202 | -----                                                 | GCNIHGS |
| T. cacaoERV-A2         | 202 | -----                                                 | GCNIHGS |
| P. trichocarpaERV-A3   | 202 | -----                                                 | GCNINGS |
| P. trichocarpaERV-A4   | 202 | -----                                                 | GCNINGS |
| C. sativusERV-A1       | 200 | -----                                                 | GCNIYGF |
| V. viniferaERV-A2      | 202 | -----                                                 | GCNVYGF |
| B. rapaERV-A4          | 198 | -----                                                 | GCNVHGF |
| B. rapaERV-A3          | 198 | -----                                                 | GCNIHGF |
| E. salsugineumERV-A2   | 202 | -----                                                 | GCNVHGF |

## BLOCK#3

|                       |     |       |         |
|-----------------------|-----|-------|---------|
| A.thalianaERV-A2      | 202 | ----- | GCNVHGF |
| C.rubellaERV-A2       | 202 | ----- | GCNIHGF |
| B.rapaERV-A2          | 202 | ----- | GCNIFGF |
| E.salsugineumERV-A3   | 202 | ----- | GCNIYGF |
| B.distachyonERV-A1    | 202 | ----- | GCNIYGF |
| O.sativaERV-A1        | 202 | ----- | GCNIYGF |
| S.bicolorERV-A1       | 202 | ----- | GCNIYGF |
| Z.maysERV-A1          | 202 | ----- | GCNIYGF |
| S.lycopersicumERV-A1  | 202 | ----- | GCNMYGF |
| S.tuberosumERV-A1     | 202 | ----- | GCNMYGF |
| B.rapaERV-A1          | 202 | ----- | GCNIYGF |
| E.salsugineumERV-A1   | 202 | ----- | GCNIYGF |
| A.thalianaERV-A1      | 202 | ----- | GCNIYGF |
| C.rubellaERV-A1       | 202 | ----- | GCNIYGF |
| V.viniferaERV-A1      | 202 | ----- | GCNIYGF |
| C.sativusERV-A2       | 202 | ----- | GCNIYGF |
| M.truncatulaERV-A1    | 202 | ----- | GCNVYGF |
| P.persicaERV-A1       | 202 | ----- | GCNIYGF |
| P.vulgarisERV-A1      | 202 | ----- | GCNVYGF |
| G.maxERV-A1           | 202 | ----- | GCNVYGF |
| G.maxERV-A2           | 202 | ----- | GCNVYGF |
| T.cacaoERV-A1         | 202 | ----- | GCNIYGF |
| P.trichocarpaERV-A1   | 202 | ----- | GCNIYGF |
| P.trichocarpaERV-A2   | 193 | ----- | GCNIYGF |
| C.reinhardtiiERV-B    | 164 | ----- | GCHVYGT |
| V.carteriERV-B        | 162 | ----- | GCHVYGT |
| C.subellipsoideaERV-B | 152 | ----- | GCNIFGV |
| K.flaccidumERV-B      | 174 | ----- | GCRVYGH |
| P.patensERV-B         | 169 | ----- | GCNIFGV |
| S.moellendorffiiERV-B | 160 | ----- | GCRVFGV |
| S.bicolorERV-B        | 171 | ----- | GCRVYGM |
| Z.maysERV-B           | 171 | ----- | GCRVYGM |
| B.distachyonERV-B     | 170 | ----- | GCRVYGM |
| O.sativaERV-B         | 170 | ----- | GCRVYGV |
| B.rapaERV-B2          | 170 | ----- | GCRVYGV |
| B.rapaERV-B1          | 173 | ----- | GCRVYGV |
| E.salsugineumERV-B    | 169 | ----- | GCRVYGV |
| A.thalianaERV-B       | 177 | ----- | GCRVYGV |
| C.rubellaERV-B        | 177 | ----- | GCRVYGV |
| M.truncatulaERV-B     | 178 | ----- | GCRVYGV |
| P.vulgarisERV-B       | 172 | ----- | GCRVYGV |
| G.maxERV-B1           | 175 | ----- | GCRVYGV |
| G.maxERV-B2           | 171 | ----- | GCRVYGV |
| C.sativusERV-B        | 169 | ----- | GCRVYGV |
| S.lycopersicumERV-B1  | 169 | ----- | GCRVYGV |
| S.tuberosumERV-B1     | 162 | ----- | GCRVYGV |
| S.lycopersicumERV-B2  | 171 | ----- | GCRVYGV |
| S.tuberosumERV-B2     | 171 | ----- | GCRVYGI |
| P.persicaERV-B        | 172 | ----- | GCQVFGV |
| P.trichocarpaERV-B1   | 172 | ----- | GCRVYGV |
| P.trichocarpaERV-B2   | 172 | ----- | GCRVYGV |
| V.viniferaERV-B       | 172 | ----- | GCRVYGV |
| T.cacaoERV-B          | 172 | ----- | GCRVYGV |

----->

BLOCK#4----->

|                        |     |                                                            |
|------------------------|-----|------------------------------------------------------------|
| C. subellipsoideaPDI-C | 288 | VLVKKVPGALHFLAKSPGHS-----FDYQAM---NMSHVVNYLWFGNKPSPRR      |
| C. reinhardtiiPDI-C    | 293 | VMVKKVPGTVHVFVARSEGH-----FDHTWM---NMTHTMHSFHVGTTRPSPRK     |
| V. carteriPDI-C        | 293 | VMVKKVPGTLTVVARSEGH-----FDHTWM---NMTHTLVHTFHVGTTRPSPRK     |
| K. flaccidumPDI-C      | 343 | VLVKKVPGNLQVAAVSAGHS-----FDPATM---NMSHSVNSFSFGGRKPTLKQ     |
| B. rapaPDI-C1          | 300 | VRVKKVPGNLIISAHSGAHS-----FDSSQM---NMSHVVSHLSFGRMFSRPL      |
| B. rapaPDI-C2          | 301 | VRVKKVPGNLVISAHSGAHS-----FDSSQM---NMSHVVTTHLSFGRMIDTRL     |
| E. salisugineumPDI-C1  | 300 | VRVKKVPGNLVISAHSGAHS-----FDSTQM---NMSHVVTTHLSFGRMFSRPL     |
| A. thalianaPDI12       | 300 | VRVKKVPGNLVISAHSGAHS-----FDSSQM---NMSHVVSHLSFGRMFSRPL      |
| C. rubellaPDI-C1       | 300 | VRVKKVPGNLIISAHSGAHS-----FDSSQM---NMSHVVTTHLSFGRMFSRPL     |
| B. rapaPDI-C5          | 294 | VRAKKVPGELVISAVSGSH-----FDASRM---NMTHEVNHLSFGRILSDRL       |
| A. thalianaPDI13       | 301 | VRAKKVPGELVISAHSGAHS-----FDASQM---NMSHIVTTHLTFGTMVSERL     |
| C. rubellaPDI-C3       | 300 | VRAKKVPGELVISAHSGAHS-----FDASQM---NMSHIVTTHLTFGTMVSERL     |
| B. rapaPDI-C6          | 300 | VRAKKVPGELIISAHSGAHS-----FDASQM---NMSHVVTTHLSFGRMFSRPL     |
| E. salisugineumPDI-C3  | 301 | VRAKKVPGVVISAHSGAHS-----FDASQM---NMSHIVTTHLSFGRMFSRPL      |
| S. bicolorPDI-C        | 301 | VRVKKVPGSVIVAARSGSH-----FDPSQI---NVSHVVTQFSFGKRLSHRM       |
| Z. maysPDI-C           | 299 | VRVKKVPGSVVISARSGSH-----FDPSQI---NVSHVVTQFSFGKRLSPRM       |
| B. distachyonPDI-C     | 301 | VRVKKVPGSVIISARSGSH-----FDPSQI---NVSHVVTQFSFGKRLSPNM       |
| O. sativaPDI-C         | 301 | VRVKKVPGSVVISARSGSH-----FDPSQI---NVSHVVTQFSFGKRLSAKM       |
| B. rapaPDI-C4          | 300 | MRVKKVPGNLMVSARSGSH-----FDTSQM---NMSHVVNHLFSFGKRLPEA       |
| A. thalianaPDI7        | 300 | MRVKKVPGNLMVSARSGSH-----FDSSQM---NMSHVVNHLFSGRRIMPQK       |
| C. rubellaPDI-C2       | 300 | MRVKKVPGNLIISARSDAHS-----FDSSQM---NMSHVVNHLFSFGKRLPQK      |
| B. rapaPDI-C3          | 298 | IRVKKVPGNLMVSARSGSH-----FDSTQM---NMSHVVNHLFSFGKRLPQT       |
| E. salisugineumPDI-C2  | 300 | MRVKKVPGNLMVSARSGSH-----FDSSQM---NMSHVVNHLFSGRRILPQT       |
| S. lycopersicumPDI-C   | 301 | VRVKKVPGNLVISARSAHS-----FDASQM---NMSHVVISFSFGKTIIPKV       |
| S. tuberosumPDI-C      | 301 | VRVKKVPGNLVISARSAHS-----FDASQM---NMSHVVISFSFGKTIIPKV       |
| M. truncatulaPDI-C1    | 300 | VRVKKVPGNLIISARSDAHS-----FDASQM---NMSHIVHHLFSFGKRLSPKL     |
| P. vulgarisPDI-C1      | 300 | VRVKKVPGNLIISARSDAHS-----FDASQM---NMSHVVNHLFSFGKRVSPRV     |
| G. maxPDI-C1           | 300 | VRVKKVPGNLIISARSDAHS-----FDASQM---NMSHVINHLFSFGKRVSPRV     |
| G. maxPDI-C2           | 300 | VRVKKVPGNLIISARSDAHS-----FDASQM---NMSHVINHLFSFGKRVSLRV     |
| M. truncatulaPDI-C2    | 297 | VRVKKVPGSLVVSARSDAHS-----FDASQM---NMSHVINHLFSFGKRVTPRA     |
| P. vulgarisPDI-C2      | 300 | VRVKKVPGNLIISARSDAHS-----FDASQM---NMSHVVNHLFSFGKRVTPRA     |
| G. maxPDI-C3           | 300 | VRVKKVPGNLIISARSDAHS-----FDASQM---NMSHVINHLFSFGKRVTPRA     |
| G. maxPDI-C4           | 300 | VRVKKVPGNLIISARSDAHS-----FDASQM---NMSHVINHLFSFGKRVTPRA     |
| V. viniferaPDI-C       | 301 | VRVKKVPGNLVISARSGSH-----FDPSQM---NMSHVVISHLFSFGKRIAPRV     |
| C. sativusPDI-C        | 301 | VRVKKVPGSLVIAARSESH-----FDASQM---NMSHIVISHLFSFGKRIAPRV     |
| P. persicaPDI-C        | 300 | VRVKKVPGNLVISAHSGAHS-----FDASQM---NMSHVVISHSFGRMIAPKV      |
| T. cacaoPDI-C          | 297 | VRVKKVPGNLIISARSAHS-----FDASQM---NMSHVVISHLFSFGKRIAPRV     |
| P. trichocarpaPDI-C1   | 301 | VRVKKVPGNLMISALSGAHS-----FDSKQM---NLSHVVISHSFSGMKVLPVR     |
| P. trichocarpaPDI-C2   | 301 | VRVKKVPGNLVISARSGAHS-----FDSKQM---NLSHVVISHSFSGMKVLPVR     |
| S. moellendorffiiPDI-C | 291 | IRAKKVPGNIIISAHSGSH-----FDASAM---NMTHTVVSQTFGRRLNFWM       |
| P. patensPDI-C         | 306 | VRVKKVPGELMISAHSGSH-----FDATSM---NMTHTVVSQTFGRKTSWRSS      |
| C. reinhardtiiERV-A    | 243 | LEVNVKVGAFHFPAGRSYQQGSMHVD-IAPFGDAVI---DFRHTVHKLKLSFG----- |
| V. carteriERV-A        | 212 | LEVNVKVGAFHFPAGRSYQQGSMHVD-IAPFGDAVI---DFRHTVHKLKLSFG----- |
| C. subellipsoideaERV-A | 204 | LAVNVKVGAFHFPAGKSFQQGPMHVD-LVFPQGVTF---DLSHRIDKLSFG-----   |
| K. flaccidumERV-A      | 209 | LEVNVKVGAFHFPAGKSFQQAHMHVD-LVFPASQKF---NMSHIVINKLSFG-----  |
| B. distachyonERV-A3    | 209 | LDVSKVAGNFHFPAGRGFYESNVDVPE--LSSLEGGF---NITHKINKLSFG-----  |
| O. sativaERV-A3        | 209 | LDVSKVAGNFHFPAGKGFYESNINVDPE--LSALEHGF---NITHKINKLSFG----- |
| Z. maysERV-A3          | 209 | LDVSKVAGNFHFPAGKGFYESNIDVPE--LSSLEGGF---NISHKINKLSFG-----  |
| B. distachyonERV-A2    | 209 | LDVSKVAGNFHFPAGKGFYESNIDVPE--LSSLEGGF---NITHKINKLSFG-----  |
| S. bicolorERV-A3       | 209 | LDVSKVAGNFHFPAGKGFYESNIDVPE--LSSLEGGF---NITHKINKLSFG-----  |
| P. patensERV-A1        | 211 | LEVNVKVGAFHFPAGKSFQQANMHVD-LVAFGKDSF---NVSHKINEKLSFG-----  |
| P. patensERV-A4        | 209 | LEVNVKVGAFHFPAGKSFQQSAMHLD-LMGIRSDSF---NVSHIVNELSFG-----   |
| P. patensERV-A2        | 209 | LEVNVKVGAFHFPAGKSFQQSAMHLD-LMGFITDSF---NVSHITNELSFG-----   |
| P. patensERV-A3        | 209 | LEVNVKVGAFHFPAGKSFQQSAMHLD-LMGFVTDSD---NVSHITNELSFG-----   |
| S. bicolorERV-A2       | 208 | VNVNVKVGAFHFPAGKSLDQSFNFQD-LNFIQPEY---NISHKINKLSFG-----    |
| B. distachyonERV-A2    | 208 | VDVNVKVGAFHFPAGKSLDQSFNFQD-LNFIQPEY---NISHKINKLSFG-----    |
| O. sativaERV-A2        | 208 | VNVNVKVGAFHFPAGKSLDQSFNFQD-LNFIQPEY---NISHKINKLSFG-----    |
| S. moellendorffiiERV-A | 209 | LEVNVKVGAFHFPAGKSFQSHVHVD-VQSLHKEKF---NVSHYINELSFG-----    |
| C. sativusERV-A3       | 209 | LEVNVKVGAFHFPVPGKSFYQSSFNFLG-LALQTSYD---NVSHRINRLAFG-----  |
| M. truncatulaERV-A2    | 209 | LEVNVKVGAFHFPATGQSFQSAIFLAD-LALQDNHY---NISHKINKLSFG-----   |
| P. vulgarisERV-A2      | 209 | LEVNVKVGAFHFPATGKSFQSAIFLAD-LALQDNHY---NISHKINKLSFG-----   |
| G. maxERV-A3           | 209 | LEVNVKVGAFHFPATGKSFQSAIFLAD-LALQDNHY---NISHKINKLSFG-----   |
| G. maxERV-A4           | 209 | LEVNVKVGAFHFPATGKSFQSAIFLAD-LALQDNHY---NISHKINKLSFG-----   |
| S. lycopersicumERV-A2  | 209 | LEVNVKVGAFHFAAGKSFHQSTFQFE-LISLQSDTY---NISHRVNRLAFG-----   |
| S. tuberosumERV-A2     | 209 | LEVNVKVGAFHFAAGKSFHQSTFQFE-LISLQSDTY---NISHRVNRLAFG-----   |
| P. persicaERV-A2       | 209 | LEVNVKVGAFHFPVSGKSFHQSNIFVQD-LAFQTSY---NISHKINRLAFG-----   |
| T. cacaoERV-A2         | 209 | LEVNVKVGAFHFPAGKSFHQSNIFVQD-LAFQKDSY---NISHKINRLAFG-----   |
| P. trichocarpaERV-A3   | 209 | LEVNVKVGAFHFPVPGKSFHQSNIFVQD-LDMQKESY---NISHKINRLAFG-----  |
| P. trichocarpaERV-A4   | 209 | LEVNVKVGAFHFPAPKSFHLSNIFVQD-LDLQKDSY---NISHKINRLAFG-----   |
| C. sativusERV-A1       | 207 | LEVNVKVGAFHFPAGRGFQSLYFQHNPLASFQWDAF---NISHKINRLAFG-----   |
| V. viniferaERV-A2      | 209 | LEVNVKVGAFHFPSPGKGFYQSNIFVQD-LAISKGDY---NISHKINRLAFG-----  |
| B. rapaERV-A4          | 205 | LEVNVKVGAFHFPVPGKSFHQSGFQFHD-MHMFQQGN---NISHKINRLAFG-----  |
| B. rapaERV-A3          | 205 | LEVNVKVGAFHFPVPGKSFHQSGFQFHD-LHMFQQGN---NISHKINRLAFG-----  |
| E. salisugineumERV-A2  | 209 | LEVNVKVGAFHFPVPGKSFHQSGFQFHD-LHMFQQGN---NISHKINRLAFG-----  |

-----> BLOCK#4----->

|                       |     |        |        |         |        |       |      |      |     |       |      |     |       |
|-----------------------|-----|--------|--------|---------|--------|-------|------|------|-----|-------|------|-----|-------|
| A.thalianaERV-A2      | 209 | LEVNVK | VAGNFH | FIPGQSF | HQSGFQ | FHD-M | LLFQ | QGN  | --- | NISHK | VNRL | AFG | ----- |
| C.rubellaERV-A2       | 209 | LEVNVK | VAGNFH | FIPGQSF | HQSGFQ | FHD-M | LLFQ | QGN  | --- | NISHK | VNRL | AFG | ----- |
| B.rapaERV-A2          | 209 | LEVNVK | VAGNFH | FIPGQSF | HQSGFQ | FHD-M | LLFQ | QGN  | --- | NISHK | VNRL | AFG | ----- |
| E.salsugineumERV-A3   | 209 | LEVNVK | VAGNFH | FIPGQSF | HQSGFQ | FHD-M | LLFQ | QGN  | --- | NISHK | VNRL | AFG | ----- |
| B.distachyonERV-A1    | 209 | VEINKV | VAGNFH | FAPGKSF | FQGSNV | VHD-L | LPFQ | KDSF | --- | NVSHK | INRL | SFG | ----- |
| O.sativaERV-A1        | 209 | LEVNVK | VAGNFH | FAPGKSF | FQGSNV | VHD-L | LPFQ | KDSF | --- | NVSHK | INRL | SFG | ----- |
| S.bicolorERV-A1       | 209 | LEVNVK | VAGNFH | FAPGKSF | FQGSNV | VHD-L | LPFQ | KDSF | --- | NVSHK | INRL | SFG | ----- |
| Z.maysERV-A1          | 209 | LEVNVK | VAGNFH | FAPGKSF | FQGSNV | VHD-L | LPFQ | KDSF | --- | NVSHK | INRL | SFG | ----- |
| S.lycopersicumERV-A1  | 209 | LEVNVK | VAGNFH | FAPGKSF | FQGSNV | VHD-L | LPFQ | KDSF | --- | NVSHK | INRL | SFG | ----- |
| S.tuberosumERV-A1     | 209 | LEVNVK | VAGNFH | FAPGKSF | FQGSNV | VHD-L | LPFQ | KDSF | --- | NVSHK | INRL | SFG | ----- |
| B.rapaERV-A1          | 209 | LEVNVK | VAGNFH | FAPGKSF | FQGSNV | VHD-L | LPFQ | KDSF | --- | NVSHK | INRL | SFG | ----- |
| E.salsugineumERV-A1   | 209 | LEVNVK | VAGNFH | FAPGKSF | FQGSNV | VHD-L | LPFQ | KDSF | --- | NVSHK | INRL | SFG | ----- |
| A.thalianaERV-A1      | 209 | LEVNVK | VAGNFH | FAPGKSF | FQGSNV | VHD-L | LPFQ | KDSF | --- | NVSHK | INRL | SFG | ----- |
| C.rubellaERV-A1       | 209 | LEVNVK | VAGNFH | FAPGKSF | FQGSNV | VHD-L | LPFQ | KDSF | --- | NVSHK | INRL | SFG | ----- |
| V.viniferaERV-A1      | 209 | LEVNVK | VAGNFH | FAPGKSF | FQGSNV | VHD-L | LPFQ | KDSF | --- | NVSHK | INRL | SFG | ----- |
| C.sativusERV-A2       | 209 | LEVNVK | VAGNFH | FAPGKSF | FQGSNV | VHD-L | LPFQ | KDSF | --- | NVSHK | INRL | SFG | ----- |
| M.truncatulaERV-A1    | 209 | LEVNVK | VAGNFH | FAPGKSF | FQGSNV | VHD-L | LPFQ | KDSF | --- | NVSHK | INRL | SFG | ----- |
| P.persicaERV-A1       | 209 | LEVNVK | VAGNFH | FAPGKSF | FQGSNV | VHD-L | LPFQ | KDSF | --- | NVSHK | INRL | SFG | ----- |
| P.vulgarisERV-A1      | 209 | LEVNVK | VAGNFH | FAPGKSF | FQGSNV | VHD-L | LPFQ | KDSF | --- | NVSHK | INRL | SFG | ----- |
| G.maxERV-A1           | 209 | LEVNVK | VAGNFH | FAPGKSF | FQGSNV | VHD-L | LPFQ | KDSF | --- | NVSHK | INRL | SFG | ----- |
| G.maxERV-A2           | 209 | LEVNVK | VAGNFH | FAPGKSF | FQGSNV | VHD-L | LPFQ | KDSF | --- | NVSHK | INRL | SFG | ----- |
| T.cacaoERV-A1         | 209 | LEVNVK | VAGNFH | FAPGKSF | FQGSNV | VHD-L | LPFQ | KDSF | --- | NVSHK | INRL | SFG | ----- |
| P.trichocarpaERV-A1   | 209 | LEVNVK | VAGNFH | FAPGKSF | FQGSNV | VHD-L | LPFQ | KDSF | --- | NVSHK | INRL | SFG | ----- |
| P.trichocarpaERV-A2   | 200 | LEVNVK | VAGNFH | FAPGKSF | FQGSNV | VHD-L | LPFQ | KDSF | --- | NVSHK | INRL | SFG | ----- |
| C.reinhardtiiERV-B    | 171 | MEVNRV | VAGNFH | FAPGKSF | FQGSNV | VHD-L | LPFQ | KDSF | --- | NVSHK | INRL | SFG | ----- |
| V.carteriERV-B        | 169 | MDVNRV | VAGNFH | FAPGKSF | FQGSNV | VHD-L | LPFQ | KDSF | --- | NVSHK | INRL | SFG | ----- |
| C.subellipsoideaERV-B | 159 | LDLQRV | VAGNFH | FAPGKSF | FQGSNV | VHD-L | LPFQ | KDSF | --- | NVSHK | INRL | SFG | ----- |
| K.flaccidumERV-B      | 181 | LDVQRV | VAGNFH | FAPGKSF | FQGSNV | VHD-L | LPFQ | KDSF | --- | NVSHK | INRL | SFG | ----- |
| P.patensERV-B         | 176 | LDVQRV | VAGNFH | FAPGKSF | FQGSNV | VHD-L | LPFQ | KDSF | --- | NVSHK | INRL | SFG | ----- |
| S.moellendorffiiERV-B | 167 | LDVQRV | VAGNFH | FAPGKSF | FQGSNV | VHD-L | LPFQ | KDSF | --- | NVSHK | INRL | SFG | ----- |
| S.bicolorERV-B        | 178 | LDVQRV | VAGNFH | FAPGKSF | FQGSNV | VHD-L | LPFQ | KDSF | --- | NVSHK | INRL | SFG | ----- |
| Z.maysERV-B           | 178 | LDVQRV | VAGNFH | FAPGKSF | FQGSNV | VHD-L | LPFQ | KDSF | --- | NVSHK | INRL | SFG | ----- |
| B.distachyonERV-B     | 177 | LDVQRV | VAGNFH | FAPGKSF | FQGSNV | VHD-L | LPFQ | KDSF | --- | NVSHK | INRL | SFG | ----- |
| O.sativaERV-B         | 177 | LDVQRV | VAGNFH | FAPGKSF | FQGSNV | VHD-L | LPFQ | KDSF | --- | NVSHK | INRL | SFG | ----- |
| B.rapaERV-B2          | 177 | LDVQRV | VAGNFH | FAPGKSF | FQGSNV | VHD-L | LPFQ | KDSF | --- | NVSHK | INRL | SFG | ----- |
| B.rapaERV-B1          | 180 | LDVQRV | VAGNFH | FAPGKSF | FQGSNV | VHD-L | LPFQ | KDSF | --- | NVSHK | INRL | SFG | ----- |
| E.salsugineumERV-B    | 176 | LDVQRV | VAGNFH | FAPGKSF | FQGSNV | VHD-L | LPFQ | KDSF | --- | NVSHK | INRL | SFG | ----- |
| A.thalianaERV-B       | 184 | LDVQRV | VAGNFH | FAPGKSF | FQGSNV | VHD-L | LPFQ | KDSF | --- | NVSHK | INRL | SFG | ----- |
| C.rubellaERV-B        | 184 | LDVQRV | VAGNFH | FAPGKSF | FQGSNV | VHD-L | LPFQ | KDSF | --- | NVSHK | INRL | SFG | ----- |
| M.truncatulaERV-B     | 185 | LDVQRV | VAGNFH | FAPGKSF | FQGSNV | VHD-L | LPFQ | KDSF | --- | NVSHK | INRL | SFG | ----- |
| P.vulgarisERV-B       | 179 | LDVQRV | VAGNFH | FAPGKSF | FQGSNV | VHD-L | LPFQ | KDSF | --- | NVSHK | INRL | SFG | ----- |
| G.maxERV-B1           | 182 | LDVQRV | VAGNFH | FAPGKSF | FQGSNV | VHD-L | LPFQ | KDSF | --- | NVSHK | INRL | SFG | ----- |
| G.maxERV-B2           | 178 | LDVQRV | VAGNFH | FAPGKSF | FQGSNV | VHD-L | LPFQ | KDSF | --- | NVSHK | INRL | SFG | ----- |
| C.sativusERV-B        | 176 | LDVQRV | VAGNFH | FAPGKSF | FQGSNV | VHD-L | LPFQ | KDSF | --- | NVSHK | INRL | SFG | ----- |
| S.lycopersicumERV-B1  | 176 | LDVQRV | VAGNFH | FAPGKSF | FQGSNV | VHD-L | LPFQ | KDSF | --- | NVSHK | INRL | SFG | ----- |
| S.tuberosumERV-B1     | 169 | LDVQRV | VAGNFH | FAPGKSF | FQGSNV | VHD-L | LPFQ | KDSF | --- | NVSHK | INRL | SFG | ----- |
| S.lycopersicumERV-B2  | 178 | LDVQRV | VAGNFH | FAPGKSF | FQGSNV | VHD-L | LPFQ | KDSF | --- | NVSHK | INRL | SFG | ----- |
| S.tuberosumERV-B2     | 178 | LDVQRV | VAGNFH | FAPGKSF | FQGSNV | VHD-L | LPFQ | KDSF | --- | NVSHK | INRL | SFG | ----- |
| P.persicaERV-B        | 179 | LDVQRV | VAGNFH | FAPGKSF | FQGSNV | VHD-L | LPFQ | KDSF | --- | NVSHK | INRL | SFG | ----- |
| P.trichocarpaERV-B1   | 179 | LDVQRV | VAGNFH | FAPGKSF | FQGSNV | VHD-L | LPFQ | KDSF | --- | NVSHK | INRL | SFG | ----- |
| P.trichocarpaERV-B2   | 179 | LDVQRV | VAGNFH | FAPGKSF | FQGSNV | VHD-L | LPFQ | KDSF | --- | NVSHK | INRL | SFG | ----- |
| V.viniferaERV-B       | 179 | LDVQRV | VAGNFH | FAPGKSF | FQGSNV | VHD-L | LPFQ | KDSF | --- | NVSHK | INRL | SFG | ----- |
| T.cacaoERV-B          | 179 | LDVQRV | VAGNFH | FAPGKSF | FQGSNV | VHD-L | LPFQ | KDSF | --- | NVSHK | INRL | SFG | ----- |

|                       |     |                               |                                  |                                |
|-----------------------|-----|-------------------------------|----------------------------------|--------------------------------|
| C.subellipsoideaPDI-C | 333 | HQSLAKLHP--AGLSDDWADKLAGQ---- | DFSR-AAK----                     | ATFEHYMQVLLTTIEPSKH            |
| C.reinhardtiiPDI-C    | 338 | YQQLKRLHP--AGLTADWADKLHDQ---- | LFVSE-HTQ----                    | STHEHYLQVVLTTIEPRHS            |
| V.carteriPDI-C        | 338 | YQQLKRLHP--AGLTHDWADQLRDQ---- | FLSE-HPQ----                     | STHEHYLQVVLTSIEPRRS            |
| K.flaccidumPDI-C      | 388 | YHEIDRIWSHHPSAGED---RLTGR---  | YHSH-SDN---                      | LTHEHYLQVVLTSVEFLKL            |
| B.rapaPDI-C1          | 345 | LTDMRLLPYIGQSHD---KLNK----    | AFINQ-HEFGANVTIEHYLQVVKTEVITRRT  |                                |
| B.rapaPDI-C2          | 346 | LTDLKRLLPYLGQSHD---KLDEK----  | AFINQ-HEFGANVTIEHYLQVVKTEVITRRT  |                                |
| E.salsugineumPDI-C1   | 345 | LTDMRLLPYLGQSHG---RLDEK----   | AFINQ-HEFGANVTIEHYLQVVKTEVITRKS  |                                |
| A.thalianaPDI12       | 345 | LTDMRLLPYLGLSHD---RLDGK----   | AFINQ-HEFGANVTIEHYLQVVKTEVITRRS  |                                |
| C.rubellaPDI-C1       | 345 | LTDMRLLPYLGQSHD---RLDGK----   | AFINQ-HEFGANVTIEHYLQVVKTEVITRRS  |                                |
| B.rapaPDI-C5          | 339 | LTDMRLLPYLGLSHD---RLNGK----   | WVNE-GKFAANVTIEHYLQVVKTEVVSRRF   |                                |
| A.thalianaPDI13       | 346 | WTDMRLLPYLGQSHD---RLNGK----   | SEINE-RQLDANVTIEHYLQVVKTEVVSRRS  |                                |
| C.rubellaPDI-C3       | 345 | WTDMRLLPYLGQSHD---RLNGK----   | SEINQ-RQLDANVTIEHYLQVVKTEVVSRRF  |                                |
| B.rapaPDI-C6          | 345 | LTDMRLLPYLGLSHD---RLNSK----   | WVNE-GQFAANVTIEHYLQVVKTEVVSRRF   |                                |
| E.salsugineumPDI-C3   | 346 | LTDMRLLPYLGQSHD---RLNGK----   | WFLNQ-GQFAANVTIEHYLQVVKTEVVSRRF  |                                |
| S.bicolorPDI-C        | 346 | LDEFRLTPYLSGYND---RLAGQ----   | SYIVKHGEVNANVTIEHYLQVVKTEVITQRS  |                                |
| Z.maysPDI-C           | 344 | LHEFIRLTPYLRGYHD---RLAGQ----  | SYIVKHGEVNANVTIEHYLQVVKTEVITQRS  |                                |
| B.distachyonPDI-C     | 346 | FSELKRLIPYVGGSHD---RLAGQ----  | SYIVKHGDNNANVTIEHYLQVVKTEVITLRS  |                                |
| O.sativaPDI-C         | 346 | FNELKRLTPYVGGSHD---RLAGQ----  | SYIVKHGDVNANVTIEHYLQVVKTEVITLRS  |                                |
| B.rapaPDI-C4          | 345 | FSDLKRLAPYLGSSH---RLDDR----   | SEINQ-HDLGPNVTIEHYLQVVKTEVVKNSG  |                                |
| A.thalianaPDI7        | 345 | FSEFKRLSPYLGLSHD---RLDGR----  | SEINQ-RDLGPNVTIEHYLQVVKTEVVKNSG  |                                |
| C.rubellaPDI-C2       | 345 | FSELKRLSPYLGRNHD---RLDGR----  | PEINQ-RDLGPNVTIEHYLQVVKTEVVKNSG  |                                |
| B.rapaPDI-C3          | 343 | FTDLKRLSPYLQSHD---RLNGR----   | PEINQ-RDLGPNVTIEHYLQVVKTEVVKNSG  |                                |
| E.salsugineumPDI-C2   | 345 | FADLKRLLPYLGRSHD---RLDGR----  | PEINQ-RDLGPNVTIEHYLQVVKTEVVKNSG  |                                |
| S.lycopersicumPDI-C   | 346 | MSDIKILLPHLGRSHD---RLNGN----  | SYVTNPRDSTENVTIEHFLOVVKTEVMTRSY  |                                |
| S.tuberosumPDI-C      | 346 | MSDIKILLPHLGRSHD---RLNGN----  | SYVTNPRDSTENVTIEHFLOVVKTEVMTRSY  |                                |
| M.truncatulaPDI-C1    | 345 | MSDVQRLIPYVGNSHD---RLDGL----  | SEINS-HDFGANVTIEHYLQVVKTEVITRQG  |                                |
| M.truncatulaPDI-C1    | 345 | MSDVKRLIPYVGNSHD---RLNGL----  | SEINT-RDFGANVTIEHYLQVVKTEVITRKD  |                                |
| G.maxPDI-C1           | 345 | MSDVKRLIPYVGNSHD---RLNGR----  | SEINT-HDLGANVTIEHYLQVVKTEVITRKD  |                                |
| G.maxPDI-C2           | 345 | MSDVKRLIPYVGNSHD---RLNGR----  | SEINT-HDLGANVTIEHYLQVVKTEVITRKE  |                                |
| M.truncatulaPDI-C2    | 342 | MIDVKHWIPYLGINHD---RLNGR----  | SEINT-RDLEGNVTIEHYLQVVKTEVITRKG  |                                |
| P.vulgarisPDI-C2      | 345 | MSDVKRLIPYLGSSH---RLSGR----   | SESNT-RDFGANVTIEHYLQVVKTEVVTNRKG |                                |
| G.maxPDI-C3           | 345 | MSDVKLLIPYIGSSH---RLNGR----   | SEINT-RDLGANVTIEHYLQVVKTEVVTNRKG |                                |
| G.maxPDI-C4           | 345 | MSDVKLLIPYIGSSH---RLNGR----   | SETNT-HDLGANVTIEHYLQVVKTEVVTNRG  |                                |
| V.viniferaPDI-C       | 346 | MSDMKRVLPYIGSHD---RLNGR----   | SYTSHPSDSNANVTIEHYLQVVKTEVITTRD  |                                |
| C.sativusPDI-C        | 346 | FSDAKQLIPYIGISHD---RLNGR----  | SEINQ-RDLGANVTIEHYLQVVKTEVVTTRRS |                                |
| P.persicaPDI-C        | 345 | MSDVKRLVPYLGSSH---RLNGR----   | SEINH-RDLGANVTIEHYLQVVKSEVITGRN  |                                |
| T.cacaoPDI-C          | 342 | LSDVKRLIPYIGRSHD---RLNGR----  | SEINH-RELDANVTIEHYLQVVKTEVVTTRRS |                                |
| P.trichocarpaPDI-C1   | 346 | MSDVKRLPYIGRSHD---KLNGR----   | SEINH-RDVGANVTIEHYLQVVKTEVVTTRRS |                                |
| P.trichocarpaPDI-C2   | 346 | MSDVKRLPHIGRSHD---KLNGR----   | SEINH-RDVGANVTIEHYLQVVKTEVVTTRRS |                                |
| S.moellendorffiiPDI-C | 336 | RRELYRIYPLASVYDTVEANLTGR---   | IYVSQ-HEN---                     | ITHDHYLQVVKTEVVSRLRK           |
| P.patensPDI-C         | 351 | VHWVNEMLPALDSNID---RLTQ---    | VEPSE-YEN---                     | ITHDHYLQVVKTEVITLHR            |
| C.reinhardtiiERV-A    | 291 | -----EYPGGMKN---              | PLDGAKAGQAAAAAAAAAT---           | GMQYFVFKVPTSYTDLNS             |
| V.carteriERV-A        | 260 | -----APYPGMKN---              | PLDNA-----                       | KAGYKSAATGMQYFVFKVPTSYTDLN     |
| C.subellipsoideaERV-A | 252 | -----HEYPGTMN---              | PLDRV-NLPKENTR-NPQGLF            | GAYQYFVFKVPTIYVNSHN            |
| K.flaccidumERV-A      | 257 | -----ADYPGVVH---              | PLDNV-----                       | RRIQE-ADG---GMQYFVFKVPTIYTDLSG |
| B.distachyonERV-A3    | 256 | -----TEFPGVWN---              | PLDGA---QWTOP-ASD---             | GTQYFVFKVPTIYTDTRG             |
| O.sativaERV-A3        | 256 | -----TEFPGVWN---              | PLDGA---QWTOP-ASD---             | GTQYFVFKVPTIYTDTRG             |
| Z.maysERV-A3          | 256 | -----TEFPGVWN---              | PLDGA---QWTOP-ASD---             | GTQYFVFKVPTIYTDTRG             |
| Z.maysERV-A2          | 256 | -----TEFPGVWN---              | PLDGA---QWTOP-ASD---             | GTQYFVFKVPTIYTDTRG             |
| S.bicolorERV-A3       | 256 | -----TEFPGVWN---              | PLDGA---QWTOP-ASD---             | GTQYFVFKVPTIYTDTRG             |
| P.patensERV-A1        | 259 | -----VRYPGAVN---              | PLDKL---ERIQT-TTH---             | GMQYFVFKVPTIYTDTRG             |
| P.patensERV-A4        | 257 | -----AHEPGRVN---              | PLDKI---TSIQK-DQN---             | GMQYFVFKVPTIYTDTRG             |
| P.patensERV-A2        | 257 | -----AHEPGRVN---              | PLDKV---TNIQK-DLN---             | GMQYFVFKVPTIYTDTRG             |
| P.patensERV-A3        | 257 | -----AYEPGAVN---              | PLDKV---TSIQK-DQN---             | GMQYFVFKVPTIYTDTRG             |
| S.bicolorERV-A2       | 256 | -----EEFPGVWN---              | PLDGV---EWIQD-NSNGLT             | GMQYFVFKVPTIYTDTRG             |
| B.distachyonERV-A2    | 256 | -----KEFPGVWN---              | PLDGV---EWKQE-QATGLT             | GMQYFVFKVPTIYTDTRG             |
| O.sativaERV-A2        | 256 | -----VEFPGVWN---              | PLDGV---EWIQE-HTNGLT             | GMQYFVFKVPTIYTDTRG             |
| S.moellendorffiiERV-A | 257 | -----AREPGRVN---              | PLDKE---KRIQK-FPS---             | AMYQYFVFKVPTIYTDTRG            |
| C.sativusERV-A3       | 257 | -----NHYDGLVN---              | PLDGV---HMEYN-EQN---             | VMHQYFVFKVPTIYTDTRG            |
| M.truncatulaERV-A2    | 257 | -----HHYPGLVN---              | PLDGI---KWVQG-NDH---             | GMQYFVFKVPTIYTDTRG             |
| P.vulgarisERV-A2      | 257 | -----HHEPGLVN---              | PLDGV---KWVQG-PTH---             | GMQYFVFKVPTIYTDTRG             |
| G.maxERV-A3           | 257 | -----HHEPGLVN---              | PLDGV---KWVQG-PAH---             | GMQYFVFKVPTIYTDTRG             |
| G.maxERV-A4           | 257 | -----HHEPGLVN---              | PLDGV---RWVQG-PTH---             | GMQYFVFKVPTIYTDTRG             |
| S.lycopersicumERV-A2  | 257 | -----DSIPGVWN---              | PLDGV---QWTOE-AQN---             | GMQYFVFKVPTIYTDTRG             |
| S.tuberosumERV-A2     | 257 | -----DSIPGVWN---              | PLDGV---QWTOE-AQN---             | GMQYFVFKVPTIYTDTRG             |
| P.persicaERV-A2       | 257 | -----DYEPGKLN---              | PLDGV---QWRQE-TPN---             | GMQYFVFKVPTIYTDTRG             |
| T.cacaoERV-A2         | 257 | -----EYEPGVWN---              | PLDGA---QWIHE-TSN---             | GMQYFVFKVPTIYTDTRG             |
| P.trichocarpaERV-A3   | 257 | -----DYEPGVWN---              | PLDGI---QLMHE-TQN---             | GVQCFVFKVPTIYTDTRG             |
| P.trichocarpaERV-A4   | 257 | -----DYEPGVWN---              | PLAGI---QLMHD-TPN---             | GVQCFVFKVPTIYTDTRG             |
| C.sativusERV-A1       | 256 | -----DFEPGVWN---              | PLDGV---QWNQG-TLS---             | GMQYFVFKVPTIYTDTRG             |
| V.viniferaERV-A2      | 257 | -----DHEPGRVN---              | PLDGA---QWFQD-APD---             | GMQYFVFKVPTIYTDTRG             |
| B.rapaERV-A4          | 253 | -----DFEPGVWN---              | PLDGV---QWNQD-KQN---             | GVYQYFVFKVPTIYTDVHG            |
| B.rapaERV-A3          | 253 | -----DFEPGVWN---              | PLDGV---QWNQE-KQN---             | GVYQYFVFKVPTIYTDVHG            |
| E.salsugineumERV-A2   | 257 | -----DFEPGVWN---              | PLDGV---QWNQE-KQN---             | GVYQYFVFKVPTIYTDVHG            |

|                       |     |                    |          |              |                        |
|-----------------------|-----|--------------------|----------|--------------|------------------------|
| A.thalianaERV-A2      | 257 | -----DFEPGVVN----- | PLDGV--- | QWNOG-KQS--- | GVYQYFIKVVPSIYTDVHQ    |
| C.rubellaERV-A2       | 257 | -----DFEPGVVN----- | PLDGV--- | QWNOG-KQS--- | GVYQYFIKVVPSIYTDVHR    |
| B.rapaERV-A2          | 257 | -----DRFPGVWN----- | PLDGV--- | QWTOE-TLN--- | GMVQYFIKVVPTVYTDVVRG   |
| E.salsugineumERV-A3   | 257 | -----DYEPGVVN----- | PLDSV--- | QWTOE-TLN--- | GMVQYFIKVVPTVYTDVKE    |
| B.distachyonERV-A1    | 257 | -----EPEPGVWN----- | PLDGA--- | HWFOH-SPY--- | GMVQYFIKVVPTVYTDVSHINE |
| O.sativaERV-A1        | 257 | -----QREPGVWN----- | PLDGA--- | QWMOH-SSY--- | GMVQYFIKVVPTVYTDINE    |
| S.bicolorERV-A1       | 257 | -----EYEPGVVN----- | PLDGA--- | SWVOH-SSY--- | GMVQYFIKVVPTVYTDINE    |
| Z.maysERV-A1          | 257 | -----EYEPGVVN----- | PLDGA--- | NWVOH-SSY--- | GMVQYFIKVVPTVYTDINE    |
| S.lycopersicumERV-A1  | 257 | -----EYEPGVVN----- | PLDGV--- | KWTOE-TPH--- | GMVQYFIKVVPTVYTDVSG    |
| S.tuberosumERV-A1     | 257 | -----EYEPGVVN----- | PLDGV--- | MWTOE-TPH--- | GMVQYFIKVVPTVYTDVSG    |
| B.rapaERV-A1          | 257 | -----DYEPGVVN----- | PLDKV--- | QWSOD-TPN--- | AMVQYFIKVVPTVYTDISG    |
| E.salsugineumERV-A1   | 257 | -----DYEPGVVN----- | PLDRV--- | QWQOD-TPN--- | AMVQYFIKVVPTVYTDISG    |
| A.thalianaERV-A1      | 257 | -----DYEPGVVN----- | PLDKV--- | QWSOD-TPN--- | AMVQYFIKVVPTVYTDIRG    |
| C.rubellaERV-A1       | 257 | -----DYEPGVVN----- | PLDKV--- | QWSOD-TPN--- | AMVQYFIKVVPTVYTDIRG    |
| V.viniferaERV-A1      | 257 | -----DYEPGVVN----- | PLDGV--- | QWIOA-TPS--- | GMVQYFIKVVPTVYTDVSG    |
| C.sativusERV-A2       | 257 | -----EYEPGVVN----- | PLDSV--- | QWKOE-TPS--- | ATVQYFIKVVPTVYNSVSG    |
| M.truncatulaERV-A1    | 257 | -----DYEPGVVN----- | PLDRV--- | HWTOE-TPS--- | GMVQYFIKVVPTVYTDVSG    |
| P.persicaERV-A1       | 257 | -----DYEPGVVN----- | PLDGV--- | HWAOA-TPS--- | GMVQYFIKVVPTVYTDVSG    |
| P.vulgarisERV-A1      | 257 | -----EYEPGVVN----- | PLDGV--- | HWIOE-TPS--- | GMVQYFIKVVPTVYTDVNG    |
| G.maxERV-A1           | 257 | -----EYEPGVVN----- | PLDGV--- | HWTOE-TPS--- | GMVQYFIKVVPTVYTDVSG    |
| G.maxERV-A2           | 257 | -----EYEPGVVN----- | PLDGV--- | HWTOE-TPS--- | GMVQYFIKVVPTVYTDVSG    |
| T.cacaoERV-A1         | 257 | -----DYEPGVVN----- | PLDGV--- | HWTOE-QPS--- | GMVQYFIKVVPTVYTDVSG    |
| P.trichocarpaERV-A1   | 257 | -----EYEPGVVN----- | PLDGV--- | QWTOE-TPS--- | GMVQYFIKVVPTVYTDVSG    |
| P.trichocarpaERV-A2   | 248 | -----EYEPGVVN----- | PLDGV--- | QWTOE-TPS--- | GMVQYFIKVVPTVYTDVSG    |
| C.reinhardtiiERV-B    | 219 | -----PHYPGQLN----- | PLDGY--- | VRMVGREPF--- | SYKYFIKVVPTVYTDVNRGL   |
| V.carteriERV-B        | 217 | -----PHYPGQLN----- | PLDGY--- | VRMVK-GPP--- | QSEKYFIKVVPTVYTDVNRGL  |
| C.subellipsoideaERV-B | 203 | -----PTEPGVWN----- | PLDGA--- | ERILD-KES--- | GTEKYFIKVVPTVYTKLDG    |
| K.flaccidumERV-B      | 225 | -----PPIPGTIN----- | PLDGY--- | TRILK-TEQ-ES | GTEKYFIKVVPTVYTFPLKG   |
| P.patensERV-B         | 220 | -----PTYPGHHN----- | PLDGS--- | ERILH-DTS--- | GTEKYFIKVVPTVYTYHLHG   |
| S.moellendorffiiERV-B | 211 | -----PKYPGIHN----- | PLDRT--- | VRILR-DTA--- | GTEKYFIKVVPTVYTYRLNG   |
| S.bicolorERV-B        | 222 | -----PKYPGIHN----- | PLDET--- | SRILH-DTS--- | GTEKYFIKVVPTVYTYRLSK   |
| Z.maysERV-B           | 222 | -----PKYPGIHN----- | PLDET--- | SRILH-DTS--- | GTEKYFIKVVPTVYTYRLSK   |
| B.distachyonERV-B     | 221 | -----PKYPGIHN----- | PLDDT--- | TRILH-DAS--- | GTEKYFIKVVPTVYTYRLSK   |
| O.sativaERV-B         | 221 | -----PKYPGIHN----- | PLDET--- | TRILH-DTS--- | GTEKYFIKVVPTVYTYRLSK   |
| B.rapaERV-B2          | 221 | -----PKYPGIHN----- | PLDGT--- | NRILH-DTS--- | GTEKYFIKVVPTVYTYRLSK   |
| B.rapaERV-B1          | 224 | -----PKYPGIHN----- | PLDDT--- | NRILR-DTS--- | GTEKYFIKVVPTVYTYRLSK   |
| E.salsugineumERV-B    | 220 | -----PKYPGIHN----- | PLDDT--- | NRILR-DTS--- | GTEKYFIKVVPTVYTYRLSK   |
| A.thalianaERV-B       | 228 | -----PKYPGIHN----- | PLDDT--- | NRILH-DTS--- | GTEKYFIKVVPTVYTYRLSK   |
| C.rubellaERV-B        | 228 | -----PKYPGIHN----- | PLDDT--- | NRMLH-ETS--- | GTEKYFIKVVPTVYTYRLSK   |
| M.truncatulaERV-B     | 229 | -----PKYPGIHN----- | PLDET--- | SRILH-DAS--- | GTEKYFIKVVPTVYTYRISK   |
| P.vulgarisERV-B       | 223 | -----PKYPGIHN----- | PLDDT--- | NRILH-DTS--- | GTEKYFIKVVPTVYTYRISK   |
| G.maxERV-B1           | 226 | -----PKYPGIHN----- | PLDDT--- | TRILH-DTS--- | GTEKYFIKVVPTVYTYRISK   |
| G.maxERV-B2           | 222 | -----PKYPGIHN----- | PLDDT--- | TRILH-DTS--- | GTEKYFIKVVPTVYTYRISK   |
| C.sativusERV-B        | 220 | -----PKYPGIHN----- | PLDGT--- | VRILR-DTS--- | GTEKYFIKVVPTVYTYRISK   |
| S.lycopersicumERV-B1  | 220 | -----PKYPGIHN----- | PLDGT--- | ERILR-GAS--- | GTEKYFIKVVPTVYTYRISK   |
| S.tuberosumERV-B1     | 213 | -----PKYPGIHN----- | PLDGT--- | ERILR-GAS--- | GTEKYFIKVVPTVYTYRISK   |
| S.lycopersicumERV-B2  | 222 | -----PKYPGIHN----- | PLDGT--- | SRILR-GTS--- | GTEKYFIKVVPTVYTYRISK   |
| S.tuberosumERV-B2     | 222 | -----PKYPGIHN----- | PLDGT--- | SRILR-GSS--- | GTEKYFIKVVPTVYTYRISK   |
| P.persicaERV-B        | 223 | -----PKYPGIHN----- | PLDGT--- | ERILH-DTS--- | GTEKYFIKVVPTVYTYRISK   |
| P.trichocarpaERV-B1   | 223 | -----PKYPGIHN----- | PLDGT--- | TRILH-ETS--- | GTEKYFIKVVPTVYTYRISK   |
| P.trichocarpaERV-B2   | 223 | -----PKYPGIHN----- | PLDGT--- | ARILR-ETS--- | GTEKYFIKVVPTVYTYRISK   |
| V.viniferaERV-B       | 223 | -----PKYPGIHN----- | PLDGT--- | VRILR-GAS--- | GTEKYFIKVVPTVYTYRISK   |
| T.cacaoERV-B          | 223 | -----PKYPGIHN----- | PLDGT--- | VRILH-DTS--- | GTEKYFIKVVPTVYTYRISK   |

## BLOCK#5

C.subellipsoideaPDI-C 383 RPELSY-DAWEYTVH-----SHTYDTADTPAAKFFTYDLSPIQILVSEKRRAWYHFTTTTC

C.reinhardtiiPDI-C 388 RHTGNY-DAWEYTAH-----SHSYQSDSIP SARFTYDLSPIQILVHETSKPWYQFLTTSCTSC

V.carteriPDI-C 388 RHSGNY-DAWEYTAH-----SHTYQSDAIP SARFTYDLSPIQILVQETARWYQFLTTSCTSC

K.flaccidumPDI-C 437 PAHQYV-QSYDYTAH-----SNVFNAAAPVAKFHFELSPMQVVTENSRFSFSHFTTNVC

B.rapaPDI-C1 396 AQEHSLVVEEWEYTAH-----SSIAQTYYPVAKFHFELSPMQIMITENPKFSFSHFTTNLC

B.rapaPDI-C2 397 GQEHSLTEEHEYTAH-----SSITQTYYPVAKFHFELSPMQILITENPKFSFSHFTTNLC

E.salsugineumPDI-C1 396 GQEHSLIEEWEYTAH-----SSVAQTYYPVAKFHFELSPMQILITENPKFSFSHFTTNLC

A.thalianaPDI12 396 GQEHSLIEEWEYTAH-----SSVAQTYYPVAKFHFELSPMQILITENPKFSFSHFTTNLC

C.rubellaPDI-C1 396 GLEQAVIEEWEYTAH-----SSVAQTYYPVAKFHFELSPMQILITEDPKFSFSHFTTNLC

B.rapaPDI-C5 390 GQEHSVIEEWEYTAH-----SSVAQGYYPVAKFHFELSPMQVLI SENPKFSFSHFTTNVC

A.thalianaPDI13 397 GQEHSLIEEWEYTAH-----SSVAQSYHYPEAKFHFELSPMQVLI SENPKFSFSHFTTNVC

C.rubellaPDI-C3 396 GREHSLIEEWEYTAH-----SNVAQSYHYPEAKFHFELSPMQVLI SENPKFSFSHFTTNVC

B.rapaPDI-C6 396 GQEHSVIEEWEYTAH-----SSVAQGYYPVAKFHFELSPMQVLI SENPKFSFSHFTTNVC

E.salsugineumPDI-C3 397 GQEHSLIEEWEYTAH-----SNVAQSYHYPEAKFHFELSPMQVLI SENPKFSFSHFTTNVC

S.bicolorPDI-C 398 SKELKVLVEEWEYTAH-----SSLVQSFYVPVVKFHFEPSPMQVLTVEVPSFSFSHFTTNVC

Z.maysPDI-C 396 SKELKVLVEEWEYTAH-----SSLVQSFYVPVVKFHFEPSPMQVLTVEVPSFSFSHFTTNVC

B.distachyonPDI-C 398 SKELKVLVEEWEYTAH-----SSLVQSFYVPVVKFHFEPSPMQVLTTELPSFSFSHFTTNVC

O.sativaPDI-C 398 SKELKVLVEEWEYTAH-----SSLVQSFYVPVVKFHFEPSPMQVLTTELPSFSFSHFTTNVC

B.rapaPDI-C4 396 HAMV---EEWEYTAH-----SSVAQTYYPVAKFHFELSPMQVLI TENPKFSFSHFTTNVC

A.thalianaPDI7 396 QALV---EAWWEYTAH-----SSVAQSYYPVAKFHFELSPMQVLI TENPKFSFSHFTTNVC

C.rubellaPDI-C2 396 QVLI---EEWEYTAH-----SSVAQSYYPVAKFHFELSPMQVLI TENPKFSFSHFTTNVC

B.rapaPDI-C3 394 HAMV---EEWEYTAH-----SSVAQSYYPVAKFHFELSPMQVLI TENPKFSFSHFTTNVC

E.salsugineumPDI-C2 396 QALI---EEWEYTAH-----SSVAQSYYPVAKFHFELSPMQVLI TETSFSFSHFTTNVC

S.lycopersicumPDI-C 398 KLV---EEWEYTAH-----SSLVQSLHLPVAKFHFELSPMQVLI TENPKFSFSHFTTNVC

S.tuberosumPDI-C 398 KLV---EEWEYTAH-----SSLVQSLHLPVAKFHFELSPMQVLI TENPKFSFSHFTTNVC

M.truncatulaPDI-C1 396 YQLV---EEWEYTAH-----SSLAQSLHLPVAKFHFELSPMQVLI TEDHKSFSFSHFTTNVC

P.vulgarisPDI-C1 396 HKLV---EEWEYTAH-----SSVAQSLHLPVAKFHFELSPMQVLI TENPKFSFSHFTTNVC

G.maxPDI-C1 396 YKLV---EEWEYTAH-----SSVAQSLHLPVAKFHFELSPMQVLI TENPKFSFSHFTTNVC

G.maxPDI-C2 396 YKLV---EEWEYTAH-----SSVAQSLHLPVAKFHFELSPMQVLI TENPKFSFSHFTTNVC

M.truncatulaPDI-C2 393 YKLI---EEWEYTAH-----SSVAQSVNLPVAKFHFELSPMQVLI TENPKFSFSHFTTNVC

P.vulgarisPDI-C2 396 YKLI---EEWEYTAH-----SSVAQSVNLPVAKFHFELSPMQVLI TENPKFSFSHFTTNVC

G.maxPDI-C3 396 YKLI---EEWEYTAH-----SSVAQSLDLPVAKFHFELSPMQVLI TENPKFSFSHFTTNVC

G.maxPDI-C4 396 YKLI---EEWEYTAH-----SSVAQSVNLPVAKFHFELSPMQVLI TENPKFSFSHFTTNVC

V.viniferaPDI-C 398 HKLV---EEWEYTAH-----SSLVQSLYLPVAKFHFELSPMQVLI TENPKFSFSHFTTNVC

C.sativusPDI-C 397 GKLV---EEWEYTAH-----SSVSQSLYLPVAKFHFELSPMQVLI TENPKFSFSHFTTNVC

P.persicaPDI-C 396 HKLI---EEWEYTAH-----SSLVQSLQLPVAKFHFELSPMQVLI TENPKFSFSHFTTNVC

T.cacaoPDI-C 393 SREHSLIEEWEYTAH-----SSLAQSIYLPVTKFHFELSPMQVLI TENPKFSFSHFTTNVC

P.trichocarpaPDI-C1 397 SSERKLIEEWEYTAH-----SSLSQTVYMPVAKFHFELSPMQVLI TENPKFSFSHFTTNVC

P.trichocarpaPDI-C2 397 SAEHKLIEEWEYTAH-----SSLAQTVYMPVAKFHFELSPMQVLI TENPKFSFSHFTTNVC

S.moellendorffiiPDI-C 388 RKEFSLLEQMDYTSH-----SNTIQNTNVPVAKFHFELSPMQVLI KENPKFSFSHFTTNVC

P.patensPDI-C 399 QKDLRVLEQMDYTAH-----SNMIQSTKVPVVKFHFELSPMQVLI KENPKFSFSHFTTNVC

C.reinhardtiiERV-A 336 KTLST--NQFSVTEHFRD--AQGGAGRTLPGVFFFYDLSPIKVKVVEHGSFSLFSLTTSVC

V.carteriERV-A 302 KTLAT--NQFSVTEHFRD--SSQGGAGKTLPGVFFFYDLSPIKVKVVEHSSFSLFSLTTSVC

C.subellipsoideaERV-A 298 HTLNS--NQFSVTEHFKG--SQDFQAQ-LPGVFFFYDLSPIKVKVHETRMSFLHFLTTSVC

K.flaccidumERV-A 297 HVIST--NQFSVTEHFRD--QEVASGRSLPGVFFFYDLSPIKVKVTEQRQSFSLHFLTTSVC

B.distachyonERV-A3 296 RKIDS--NQFSVTEHFRD--GNV-PRPQPGVFFFYDFSPKVKVITEENRSFLHFLTTSVC

O.sativaERV-A3 296 RKIHS--NQFSVTEHFRD--GNI-RPKQPGVFFFYDFSPKVKVITEENRSLLHFLTTSVC

Z.maysERV-A3 296 RGIHS--NQFSVTEHFRD--GNV-RPKSQPGVFFFYDFSPKVKVITEENRSLLHFLTTSVC

Z.maysERV-A2 296 HNIHS--NQFSVTEHFRD--GNV-RPKQPGVFFFYDFSPKVKVITEENRSLLHFLTTSVC

S.bicolorERV-A3 296 HNIHS--NQFSVTEHFRD--GNI-LPKQPGVFFFYDFSPKVKVITEENRSLLHFLTTSVC

P.patensERV-A1 299 RKIST--NQFSAVTEHFKG--VGPGEHALPGVFFFYDLSPIKVKVTEKRMSEFHFHTTNVC

P.patensERV-A4 297 SELAT--NQFSVTEHYTA--GDHG-PRVPGVFFFYDLSPIKVKVTEKRSFSLHFLTTSVC

P.patensERV-A2 297 RKIST--NQFSVTEHYTA--GDHG-PRFVPGVFFFYDLSPIKVKVTEERPSFSLHFLTTSVC

P.patensERV-A3 297 RKIST--NQFSVMEHYTA--GDHGPRV-LPGVFFFYDLPKVKVTEERPSFSLHFLTTSVC

S.bicolorERV-A2 299 RKIYS--NQFSVTEHER---EAIGYPRPPPGVFFFYDFSPKVKVTEENTSLHFLTTSVC

B.distachyonERV-A2 299 RKIHS--NQFSVTEHER---EAIGYPRPPPGVFFFYDFSPKVKVTEENTSLHFLTTSVC

O.sativaERV-A2 299 RKINS--NQFSVTEHER---EAIGYPRPPPGVFFFYDFSPKVKVTEENTSLHFLTTSVC

S.moellendorffiiERV-A 297 HKIVT--NQFSVTEHFKA--VEGLNGRSLPGVFFFYDLSPIKVKVTEERKTSFSLHFLTTSVC

C.sativusERV-A3 297 RTVHS--NQFSVTEHFKS--VEFGSSQSLPGVFFFYDLSPIKVTYTEEHVSFSLHFLTTSVC

M.truncatulaERV-A2 297 RVIHS--NQFSVTEHFKS--SELGAA--VPGVFFFYDISPIKVNFKEEHIFSLHFLTTSVC

P.vulgarisERV-A2 297 RVIHS--NQFSVTEHFKS--SELGVA--VPGVFFFYDISPIKVNFKEEHIFSLHFLTTSVC

G.maxERV-A3 297 RVIHS--NQFSVTEHFKS--SELGVA--VPGVFFFYDISPIKVNFKEEHIFSLHFLTTSVC

G.maxERV-A4 297 RVIHS--NQFSVTEHFKS--SELGVA--VPGVFFFYDISPIKVNFKEEHIFSLHFLTTSVC

S.lycopersicumERV-A2 297 RTIDS--NQFSVTEHFKG--SDLGLFQSI TGVFFFYDLSPIKVTYTEEHVSFSLHFLTTSVC

S.tuberosumERV-A2 297 RTIDS--NQFSVTEHFKG--SDLGLFQSI TGVFFFYDLSPIKVTYTEEHVSFSLHFLTTSVC

P.persicaERV-A2 297 RTIRS--NQFSVTEHFKS--SELGSQLPGVFFFYDLSPIKVTYTEEHVSFSLHFLTTSVC

T.cacaoERV-A2 297 RTVHS--NQFSVTEHFKN--LEVIYPNSHPGVFFFYDFSPKVKVTEEHISFSLHFLTTSVC

P.trichocarpaERV-A3 297 RTVHS--NQFSVTEHFKT--SELMQLDLSLPGVFFFYDFSPKVKVTEEHISFSLHFMSTISIC

P.trichocarpaERV-A4 297 RTVHS--NQFSATEHFKK--SELTPLDSLPGVFFFYDFSPKVKVTEEHISFSLHFMSTISIC

C.sativusERV-A1 296 KALIS--NQFSVTEHLRG--IDGESFQALHGVFFFYDLSPIKVTYTEEHVSFSLHFLTTSVC

V.viniferaERV-A2 297 HTIQS--NQFSVTEHFRS--AEPGRPHSLPGVFFFYDLSPIKVTSKEEHISFSLHFMSTISIC

B.rapaERV-A4 293 KTIQS--NQFSVTEHFQN--AEAGRMQSPPGVFFFYDLSPIKVFIEQHVEFLHFLTTSVC

B.rapaERV-A3 293 HTIQS--NQFSVTEHFQK--MEAGRMQSPPGVFFFYDLSPIKVFIEQHVEFLHFLTTSVC

E.salsugineumERV-A2 297 NTIQS--NQFSVTEHFQN--AEAGRMQSPPGVFFFYDLSPIKVFIEQHVEFLHFLTTSVC

## BLOCK#5-----

A.thalianaERV-A2 297 NTIQS--NQFSVTEHFQN--MEAGMQSPGCVFFFYDLSPIKVIFFEQHVEFLHFITNVC  
 C.rubellaERV-A2 297 NTIQS--NQFSVTEHFQG--MEAGMQSPGCVFFFYDLSPIKVIFFEQHVEFLHFITNVC  
 B.rapaERV-A2 297 HVIQS--NQFSVTEHFQK--TEAGTQSLPGVFFFYDLSPIKVIFFEQHVEFLHFITNVC  
 E.salsugineumERV-A3 297 HIIQS--NQFSVTEHFQK--TEAGTQSLPGVFFFYDLSPIKVIFFEQHVEFLHFITNVC  
 B.distachyonERV-A1 297 QIILS--NQFSVTEHFARS--SESGRMAQLPGVFFFYDLSPIKVTFTERRHVSFLHFITNVC  
 O.sativaERV-A1 297 HIIILS--NQFSVTEHFARS--SESGRIQAVPGVFFFYDLSPIKVTFTERRHVSFLHFITNVC  
 S.bicolorERV-A1 297 HIIILS--NQFSVTEHFARS--GESGRMAQLPGVFFFYDLSPIKVTFTERRHVSFLHFITNVC  
 Z.maysERV-A1 297 HIIILS--NQFSVTEHFARS--GESGRMAQLPGVFFFYDLSPIKVTFTERRHVSFLHFITNVC  
 S.lycopersicumERV-A1 297 HTIQS--NQFSVTEHFQK--ADFGRFQSLPGVFFFYDLSPIKVTFTERRHVSFLHFITNVC  
 S.tuberosumERV-A1 297 HTIQS--NQFSVTEHFQK--ADFGRFQSLPGVFFFYDLSPIKVTFTERRHVSFLHFITNVC  
 B.rapaERV-A1 297 HTIQS--NQFSVTEHFVKS--SEAGQLQSLPGVFFFYDLSPIKVTFTERRHVSFLHFITNVC  
 E.salsugineumERV-A1 297 HSIHS--NQFSVTEHFVKS--SEAGQLQSLPGVFFFYDLSPIKVTFTERRHVSFLHFITNVC  
 A.thalianaERV-A1 297 HTIQS--NQFSVTEHFVKS--SEAGQLQSLPGVFFFYDLSPIKVTFTERRHVSFLHFITNVC  
 C.rubellaERV-A1 297 HTIQS--NQFSVTEHFVKS--SEAGQLQSLPGVFFFYDLSPIKVTFTERRHVSFLHFITNVC  
 V.viniferaERV-A1 297 HTIIST--NQFSVTEHFERN--AELGRLQSLPGVFFFYDLSPIKVTFTERRHVSFLHFITNVC  
 C.sativusERV-A2 297 YTIQS--NQFSVTEHFVRT--AEVGRQSLPAVFFFYDLSPIKVTFTERRHVSFLHFITNVC  
 M.truncatulaERV-A1 297 NTIQS--NQFSVTEHFRT--ADVGRQSLPGVFFFYDLSPIKVTFTERRHVSFLHFITNVC  
 P.persicaERV-A1 297 HTIQS--NQFSVTEHFRT--GVDGRQSLPGVFFFYDLSPIKVTFTERRHVSFLHFITNVC  
 P.vulgarisERV-A1 297 HTIQS--NQFSVTEHFRT--GVDGRQSLPGVFFFYDLSPIKVTFTERRHVSFLHFITNVC  
 G.maxERV-A1 297 HTIQS--NQFSVTEHFRT--GVDGRQSLPGVFFFYDLSPIKVTFTERRHVSFLHFITNVC  
 G.maxERV-A2 297 HTIQS--NQFSVTEHFRT--GVDGRQSLPGVFFFYDLSPIKVTFTERRHVSFLHFITNVC  
 T.cacaoERV-A1 297 HTIQS--NQFSVTEHFQK--AEINRQSLPGVFFFYDLSPIKVTFTERRHVSFLHFITNVC  
 P.trichocarpaERV-A1 297 HTIQS--NQFSVTEHFRT--ADIGRQSLPGVFFFYDLSPIKVTFTERRHVSFLHFITNVC  
 P.trichocarpaERV-A2 288 HTIQS--NQFSVTEHFRT--ADIGRQSLPGVFFFYDLSPIKVTFTERRHVSFLHFITNVC  
 C.reinhardtiiERV-B 259 RATEI--HQMSVTEHY----AQPLQRYAPAVDVHYDLSPIVMTNERPPSLLHFIVRILC  
 V.carteriERV-B 257 RVTEI--HQMSVTEHY----TQPLEPGYVPTLDVHYDLSPIVMTNERPPSLLHFIVRILC  
 C.subellipsoideaERV-B 243 TRTTI--NQMSVTEYDTV--VHKGMQ--MPSVWFSDYIISPISVTISEIRRSFAHLIVRIFC  
 K.flaccidumERV-B 267 DHVEI--NQMSVTEYTMP---SSMQPGGLPAVYFLYDLSPIAVKVTERRRNFHGHLTRILC  
 P.patensERV-B 260 EVMPT--NQFSVTEYIQ---RTKPSDRSYPAVYFLYDLSPIVVTREHRRNFHGHLTRILC  
 S.moellendorffiiERV-B 251 GKLPIT--NQFSVGEYIL---AARDDDISWPAVYFLYDLSPIVTLKEERRSFGHLTRIFC  
 S.bicolorERV-B 262 KVLPTI--NQFSVTEYELP--IRPSDEA--WPAVYFLYDLSPIVTLKEERRNLFHFLTRILC  
 Z.maysERV-B 262 KVLPTI--NQFSVTEYELP--IRPTDEA--WPAVYFLYDLSPIVTLKEERRNLFHFLTRILC  
 B.distachyonERV-B 261 QVLPIT--NQFSVTEYVVP--IRPADRS--WPAVYFLYDLSPIVTLKEERRNLFHFLTRILC  
 O.sativaERV-B 261 QVLPIT--NQFSVTEYVVP--KRATDRSAWPAVYFLYDLSPIVTLKEERRNLFHFLTRILC  
 B.rapaERV-B2 261 DILTIT--NQMSVTEYITP--MNEFDEI--WPAVYFLYDLSPIVTLKEERRSFLHFLTRILC  
 B.rapaERV-B1 264 DVLSTI--NQMSVTEYITP--MNEFDEI--WPAVYFLYDLSPIVTLKEERRSFLHFLTRILC  
 E.salsugineumERV-B 260 DVLSTI--NQMSVTEYITP--MNEFDEI--WPAVYFLYDLSPIVTLKEERRSFLHFLTRILC  
 A.thalianaERV-B 268 DVLSTI--NQMSVTEYITP--MTEFDEI--WPAVYFLYDLSPIVTLKEERRSFLHFLTRILC  
 C.rubellaERV-B 268 DVLSTI--NQMSVTEYITP--MTDFDEI--WPAVYFLYDLSPIVTLKEERRSFLHFLTRILC  
 M.truncatulaERV-B 269 EVLPTI--NQFSVTEYI--SPITSQFDEI--WPAVYFLYDLSPIVTLKEERRSFLHFLTRILC  
 P.vulgarisERV-B 263 EVLPTI--NQFSVSEYI--SP--INQFDEI--WPAVYFLYDLSPIVTLKEERRSFLHFLTRILC  
 G.maxERV-B1 266 EVLPTI--NQFSVSEYI--SP--INQFDEI--WPAVYFLYDLSPIVTLKEERRSFLHFLTRILC  
 G.maxERV-B2 262 EVLPTI--NQFSVSEYI--SP--INQFDEI--WPAVYFLYDLSPIVTLKEERRSFLHFLTRILC  
 C.sativusERV-B 260 AVLPTI--NQFSVTEYI--SP--MTDSDRS--WPAVYFLYDLSPIVTLKEERRSFLHFLTRILC  
 S.lycopersicumERV-B1 260 EVLPTI--NQFSVSEYI--SP--INEFDEI--WPAVYFLYDLSPIVTLKEERRNLFHFLTRILC  
 S.tuberosumERV-B1 253 EVLPTI--NQFSVSEYI--SP--INEFDEI--WPAVYFLYDLSPIVTLKEERRNLFHFLTRILC  
 S.lycopersicumERV-B2 262 EVLPTI--NQFSVTEYI--SP--IHDFEIT--WPAVYFLYDLSPIVTLKEERRSFLHFLTRILC  
 S.tuberosumERV-B2 262 EVSPTI--NQFSVTEYI--SP--IHDFEIT--WPAVYFLYDLSPIVTLKEERRSFLHFLTRILC  
 P.persicaERV-B 263 EVLPTI--NQFSVTEYI--SP--MKQFDEI--WPAVYFLYDLSPIVTLKEERRSFLHFLTRILC  
 P.trichocarpaERV-B1 263 EVLPTI--NQFSVTEYI--SP--MTDFDEI--WPAVYFLYDLSPIVTLKEERRSFLHFLTRILC  
 P.trichocarpaERV-B2 263 DVLPTI--NQFSVTEYI--SP--ITDFDEI--WPAVYFLYDLSPIVTLKEERRSFLHFLTRILC  
 V.viniferaERV-B 263 EVLPTI--NQFSVMEYI--SP--MNEFDEI--WPAVYFLYDLSPIVTLKEERRSFLHFLTRILC  
 T.cacaoERV-B 263 EVLPTI--NQFSVSEYI--SP--MHEFDEI--WPAVYFLYDLSPIVTLKEERRSFLHFLTRILC



----->

|                        |     |                                       |
|------------------------|-----|---------------------------------------|
| C. subellipsoideaPDI-C | 437 | AIIGGVFTVAGIVDGLVHTGARFAKK--VELGKHT   |
| C. reinhardtiiPDI-C    | 442 | AIIGGVFTVAGILDALLYQSFKVVKK--LNLGKQG   |
| V. carteriPDI-C        | 442 | AIIGGVFTVAGILDALLYQSFKVVKK--LNLGKQG   |
| K. flaccidumPDI-C      | 491 | AIIGGVFTVAGIVDGLVHTGARFAKK--VELGKQF   |
| B. rapaPDI-C1          | 451 | AIIGGVFTVAGILDSIFHNTRLRLVKK--VELGKNF  |
| B. rapaPDI-C2          | 452 | AIIGGVFTVAGILDSVHLNTRLRLVKK--VELGKNI  |
| E. salsugineumPDI-C1   | 451 | AIIGGVFTVAGILDSIFHNTRLRLVKK--VELGKNI  |
| A. thalianaPDI12       | 451 | AIIGGVFTVAGILDSIFHNTRLRLVKK--VELGKNI  |
| C. rubellaPDI-C1       | 451 | AIIGGVFTVAGILDSIFHNTRLRLVKK--VELGKNI  |
| B. rapaPDI-C5          | 445 | AIIGGVFTVAGILDSIFQSTYGYMKK--VELGKNF   |
| A. thalianaPDI13       | 452 | AIIGGVFTVAGILDSIFQNTVRLVKK--TELGKNI   |
| C. rubellaPDI-C3       | 451 | AIIGGVFTVAGILDSIFQNTVRLVKK--TELGKNI   |
| B. rapaPDI-C6          | 451 | AIIGGVFTVAGILDSIFQNTFRLVKK--TELGKNI   |
| E. salsugineumPDI-C3   | 452 | AIIGGVFTVAGILDSIFQNTIRLVKK--VELGKNI   |
| S. bicolorPDI-C        | 453 | AIIGGVFTVAGILDSIFHNTRLRLVKK--VELGKNI  |
| Z. maysPDI-C           | 451 | AIIGGVFTVAGILDSIFHNTRLRLVKK--TELGKNI  |
| B. distachyonPDI-C     | 453 | AIIGGVFTVAGILDSIFHNTRLRLVKK--VELGKDI  |
| O. sativaPDI-C         | 453 | AIIGGVFTVAGILDSIFHNTRLRLVKK--VELGKNI  |
| B. rapaPDI-C4          | 448 | AIIGGVFTVAGILDSILHQTMMLMCK--TELGKNF   |
| A. thalianaPDI7        | 448 | AIIGGVFTVAGILDSILHSMMLMCK--TELGKNF    |
| C. rubellaPDI-C2       | 448 | AIIGGVFTVAGILDSILHSMMLMCK--TELGKNF    |
| B. rapaPDI-C3          | 446 | AIIGGVFTVAGILDSILHQTMMLMCK--TELGKNF   |
| E. salsugineumPDI-C2   | 448 | AIIGGVFTVAGILDSILHQTMMLMCK--TELGKNF   |
| S. lycopersicumPDI-C   | 449 | AIIGGVFTVAGILDSILHNTRMLMCK--VELGKNF   |
| S. tuberosumPDI-C      | 449 | AIIGGVFTVAGILDSILHNTRMLMCK--VELGKNF   |
| M. truncatulaPDI-C1    | 448 | AIIGGVFTVAGILDSILHNTRLRLMCK--VELGKNF  |
| P. vulgarisPDI-C1      | 448 | AIIGGVFTVAGILDSILHNTRLRLMCK--VELGKNF  |
| G. maxPDI-C1           | 448 | AIIGGVFTVAGILDSILHNTRLRLMCK--VELGKNF  |
| G. maxPDI-C2           | 448 | AIIGGVFTVAGILDSILHNTRLRLMCK--VELGKNF  |
| M. truncatulaPDI-C2    | 445 | AIIGGVFTVAGILDSILHNTRKAMCK--TELGKNF   |
| P. vulgarisPDI-C2      | 448 | AIIGGVFTVAGILDSILHNTRMLMCK--VELGKNF   |
| G. maxPDI-C3           | 448 | AIIGGVFTVAGILDSILHNTRMLMCK--TELGKNF   |
| G. maxPDI-C4           | 448 | AIIGGVFTVAGILDSILHNTRMLMCK--VELGKNF   |
| V. viniferaPDI-C       | 450 | AIIGGVFTVAGILDSVHLNTRMLMCK--TELGKNF   |
| C. sativusPDI-C        | 449 | AIIGGVFTVAGILDSILHNTRLRLMCK--VELGKNF  |
| P. persicaPDI-C        | 448 | AIIGGVFTVAGILDSILHNTRMLMCK--VELGKNF   |
| T. cacaoPDI-C          | 448 | AIIGGVFTVAGILDSILHNTRLRLMCK--VELGKNF  |
| P. trichocarpaPDI-C1   | 452 | AIIGGVFTVAGILDSILHSTVRLMCK--VELGKNF   |
| P. trichocarpaPDI-C2   | 452 | AIIGGVFTVAGILDSILHNTRMLMCK--VELGKNF   |
| S. moellendorffiiPDI-C | 443 | AIIGGVFTVAGIVDSMLHGAMRMVKK--TELGKQF   |
| P. patensPDI-C         | 454 | AIIGGVFTVAGIIDSMLHNAMHIMCK--VELGKQY   |
| C. reinhardtiiERV-A    | 392 | AIIGGVFTVSGIVDAFVYTGTRMICK--KMEIGKFS  |
| V. carteriERV-A        | 359 | AIIGGVFTVSGIVDAFIYTSRRLVKK--KMEIGKFS  |
| C. subellipsoideaERV-A | 353 | AIIGGVFTVAGIVDAFIYHGHQAIKK--KVDLIGKQI |
| K. flaccidumERV-A      | 353 | AIIGGVFTVSGIIDAFAVYHGHKVLKK--KMEIGKLN |
| B. distachyonERV-A3    | 351 | AIIGGVFTVSGIIDSFIYHGHQKALKK--KMEIGKYR |
| O. sativaERV-A3        | 351 | AIIGGVFTVSGIIDSFIYHGHQKALKK--KMEIGKYR |
| Z. maysERV-A3          | 351 | AIIGGVFTVSGIIDSFIYHGHQKALKK--KMEIGKYR |
| Z. maysERV-A2          | 351 | AIIGGVFTVSGIIDSFIYHGHQKALKK--KMEIGKYR |
| S. bicolorERV-A3       | 351 | AIIGGVFTVSGIIDSFIYHGHQKALKK--KMEIGKYR |
| P. patensERV-A1        | 355 | AIIGGVFTVSGIIDAFAVYHGHQKALKK--RIGKDT  |
| P. patensERV-A4        | 352 | AIIGGVFTVSGIIDSFIYHGHRAIKK--KMEIGKFS  |
| P. patensERV-A2        | 352 | AIIGGVFTVSGIIDSFIYHGHRAIKK--KMEIGKLS  |
| P. patensERV-A3        | 352 | AIIGGVFTVSGIIDSFIYHGHRAIKK--KMEIGKLS  |
| S. bicolorERV-A2       | 354 | AIIGGVFTVSGIIDSFIYHGHRAIKK--KMEIGKLG  |
| B. distachyonERV-A2    | 354 | AIIGGVFTVSGIIDSFIYHGHRAIKK--KMEIGKLG  |
| O. sativaERV-A2        | 354 | AIIGGVFTVSGIIDSFIYHGHRAIKK--KMEIGKLG  |
| S. moellendorffiiERV-A | 353 | AIIGGVFTVSGIIDSFIYHGHRAIKK--KMEIGKYI  |
| C. sativusERV-A3       | 353 | AIIGGVFTVSGIIDSFIYHGHRAIKK--KMEIGKFG  |
| M. truncatulaERV-A2    | 351 | AIIGGVFTVSGIIDSFIYHGHRAIKK--KMEIGKYR  |
| P. vulgarisERV-A2      | 351 | AIIGGVFTVSGIIDSFIYHGHRAIKK--KMEIGKYT  |
| G. maxERV-A3           | 351 | AIIGGVFTVSGIIDSFIYHGHRAIKK--KMEIGKFT  |
| G. maxERV-A4           | 351 | AIIGGVFTVSGIIDSFIYHGHRAIKK--KMEIGKFT  |
| S. lycopersicumERV-A2  | 353 | AIIGGVFTVAGILDACIYHGHRAIKK--KMEIGKFG  |
| S. tuberosumERV-A2     | 353 | AIIGGVFTVAGILDACIYHGHRAIKK--KMEIGKFG  |
| P. persicaERV-A2       | 353 | AIIGGVFTVAGIIDSFIYHGHRAIKK--KMEIGKFG  |
| T. cacaoERV-A2         | 353 | AIIGGVFTVAGIIDSFIYHGHRAIKK--KMEIGKFG  |
| P. trichocarpaERV-A3   | 353 | AIIGGVFTVAGIIDSFIYHGHRAIKK--KMEIGKFS  |
| P. trichocarpaERV-A4   | 353 | AIIGGVFTVAGIIDSFIYHGHRAIKK--KMEIGKFG  |
| C. sativusERV-A1       | 352 | AIIGGVFTVSGIIDSFIYHGHRAIKK--KMEIGKFT  |
| V. viniferaERV-A2      | 353 | AIIGGVFTVSGIIDSFIYHGHRAIKK--KMEIGKFS  |
| B. rapaERV-A4          | 349 | AIIGGVFTVSGIIDSFIYHGHRAIKK--KMEIGKFN  |
| B. rapaERV-A3          | 349 | AIIGGVFTVSGIIDSFIYHGHRAIKK--KMEIGKFN  |
| E. salsugineumERV-A2   | 353 | AIIGGVFTVSGIIDSFIYHGHRAIKK--KMEIGKFN  |

----->

|                       |     |                                      |
|-----------------------|-----|--------------------------------------|
| A.thalianaERV-A2      | 353 | AIVGGIFTVSGIIVDSFIYHGQRAIKK-KMETGKFN |
| C.rubellaERV-A2       | 353 | AIVGGIFTVSGILDSFIYHGQRAIKK-KMETGKFN  |
| B.rapaERV-A2          | 353 | AIVGGIFTVSGIIVDSFVYHGQRAIKK-KMETGKFG |
| E.salsugineumERV-A3   | 353 | AIVGGIFTVSGIIVDSFIYHGQRAIKK-KMETGKFG |
| B.distachyonERV-A1    | 353 | AIVGGVFTVSGIIVDSFVYHGQRAIKK-KMETGKFN |
| O.sativaERV-A1        | 353 | AIVGGVFTVSGIIVDSFVYHGQRAIKK-KMETGKFN |
| S.bicolorERV-A1       | 353 | AIVGGVFTVSGIIVDSFVYHGQRAIKK-KMETGKFN |
| Z.maysERV-A1          | 353 | AIVGGVFTVSGIIVDSFVYHGQRAIKK-KMETGKFN |
| S.lycopersicumERV-A1  | 353 | AIVGGVFTVSGILDSFIYHGQKAIKK-KMETGKFS  |
| S.tuberosumERV-A1     | 353 | AIVGGVFTVSGILDSFIYHGQKAIKK-KMETGKFS  |
| B.rapaERV-A1          | 353 | AIVGGVFTVSGIIVDAFIYHGQKAIKK-KMETGKFS |
| E.salsugineumERV-A1   | 353 | AIVGGVFTVSGIIVDAFIYHGQKAIKK-KMETGKFS |
| A.thalianaERV-A1      | 353 | AIVGGVFTVSGIIVDAFIYHGQKAIKK-KMETGKFS |
| C.rubellaERV-A1       | 353 | AIVGGVFTVSGIIVDAFIYHGQKAIKK-KMETGKFN |
| V.viniferaERV-A1      | 353 | AIVGGVFTVSGILDSFIYHGQKAIKK-KMETGKFS  |
| C.sativusERV-A2       | 353 | AIVGGVFTVSGILDSFIYHGQKVIKK-KMETGKFS  |
| M.truncatulaERV-A1    | 353 | AIVGGIFTVSGILDSFIYHGQKAIKK-KMETGKFS  |
| P.persicaERV-A1       | 353 | AIVGGVFTVSGILDSFIYHGQKAIKK-KMETGKFS  |
| P.vulgarisERV-A1      | 353 | AIVGGIFTVSGILDSFIYHGQRAIKK-KMETGKFN  |
| G.maxERV-A1           | 353 | AIVGGIFTVSGILDSFIYHGQRAIKK-KMETGKFN  |
| G.maxERV-A2           | 353 | AIVGGIFTVSGILDSFIYHGQRAIKK-KMETGKFN  |
| T.cacaoERV-A1         | 353 | AIVGGVFTVSGILDSFIYHGQRAIKK-KMETGKYS  |
| P.trichocarpaERV-A1   | 353 | AIVGGVFTVSGILDTFIYHGQKAIKK-KMETGKFS  |
| P.trichocarpaERV-A2   | 344 | AIVGGVFTVSGILDSFIYHGQKAIKK-KMETGKFS  |
| C.reinhardtiiERV-B    | 312 | AVVGGVFALTRITDRVVDWLVRLVTK-AAARGP--  |
| V.carteriERV-B        | 310 | AVVGGAFALTRMTDRVVDWVRLVTK-----LK     |
| C.subellipsoideaERV-B | 298 | AVVGGVFALTGMDRVMHRIVTAIFS-----ASS    |
| K.flaccidumERV-B      | 322 | AVLGGTFAVTGMIDKWTYKTVQLFTS-QRSSGSQ-  |
| P.patensERV-B         | 315 | AVLGGTFAVTGMIDRWMRSRIIDFVMS--TSKQGF  |
| S.moellendorffiiERV-B | 306 | AVVGGTFSLTGMIDRWIYRLVESITR---AKGVLI  |
| S.bicolorERV-B        | 317 | AVLGGTFAVTGMIDRWMYRLIESVTN-SKTRSVLR  |
| Z.maysERV-B           | 317 | AVLGGTFAVTGMIDRWMYQLIKTVTN-SKTRSVLR  |
| B.distachyonERV-B     | 316 | AVLGGTFAVTGMIDRWMYRIIESVSS-SKPRSVLR  |
| O.sativaERV-B         | 317 | AVLGGTFAVTGMIDRWMYRLIESVTK-SKTRSVLR  |
| B.rapaERV-B2          | 316 | AVLGGTFALTGMIDRWMMFRIIESFTKKPSTRSIHK |
| B.rapaERV-B1          | 319 | AVLGGTFALTGMIDRWMMFRIIESFTKKPSTRSIHK |
| E.salsugineumERV-B    | 315 | AVLGGTFALTGMIDRWMMFRIIESFTKKPSTRSIHK |
| A.thalianaERV-B       | 323 | AVLGGTFALTGMIDRWMMFRIESFNKKPSTR---   |
| C.rubellaERV-B        | 323 | AVLGGTFALTGMIDRWMMFRIESFNK-NTNTRSMH  |
| M.truncatulaERV-B     | 325 | AVLGGTFAVTGMIDRWMYRLVEAATK-PKNKK---  |
| P.vulgarisERV-B       | 318 | AVLGGTFAVTGMIDRWMYRLLEALTK-SKSKR---  |
| G.maxERV-B1           | 321 | AVLGGTFAVTGMIDRWMYRLLEALTK-SKSKR---  |
| G.maxERV-B2           | 317 | AVLGGTFAVTGMIDRWMYRLLETITK-SKSKR---  |
| C.sativusERV-B        | 315 | AVLGGTFAVTGMIDRWMMRFLEALTK---PKRRT   |
| S.lycopersicumERV-B1  | 315 | AVLGGTFALTGMIDRWMMRFLEAVMK-KNSRSLVR  |
| S.tuberosumERV-B1     | 308 | AVLGGTFALTGMIDRWMMRFLEAVMK-KDSRGLVR  |
| S.lycopersicumERV-B2  | 317 | AVLGGTFALTGMIDRWMMYKILESFTK-KNSRTIVR |
| S.tuberosumERV-B2     | 317 | AVLGGTFALTGMIDRWMMYKILESFTK-KNSRTIVR |
| P.persicaERV-B        | 318 | AVLGGTFALTGMIDRWMMYFLEAVTK-PNARSVLR  |
| P.trichocarpaERV-B1   | 318 | AVLGGTFALTGMIDRWMMYRLLEALTK-PNPRSVLR |
| P.trichocarpaERV-B2   | 318 | AVLGGTFALTGMIDRWMMYRLLEALTK-PNRSGSFL |
| V.viniferaERV-B       | 318 | AVLGGTFALTGMIDRWMMYFLEMVTK-PNAKSVYR  |
| T.cacaoERV-B          | 318 | AVLGGTFALTGMIDRWMMFLIEGLTK-PSHKGVLR  |
