# Supplementary material for: Phylogenetic characterization and promoter expression analysis of a novel hybrid protein disulfide isomerase/cargo receptor subfamily unique to plants and chromalveolates
Source: PubMed Central journal article supplement (PMC4729789; doi:10.1007/s00438-015-1106-7), 2015-08-25

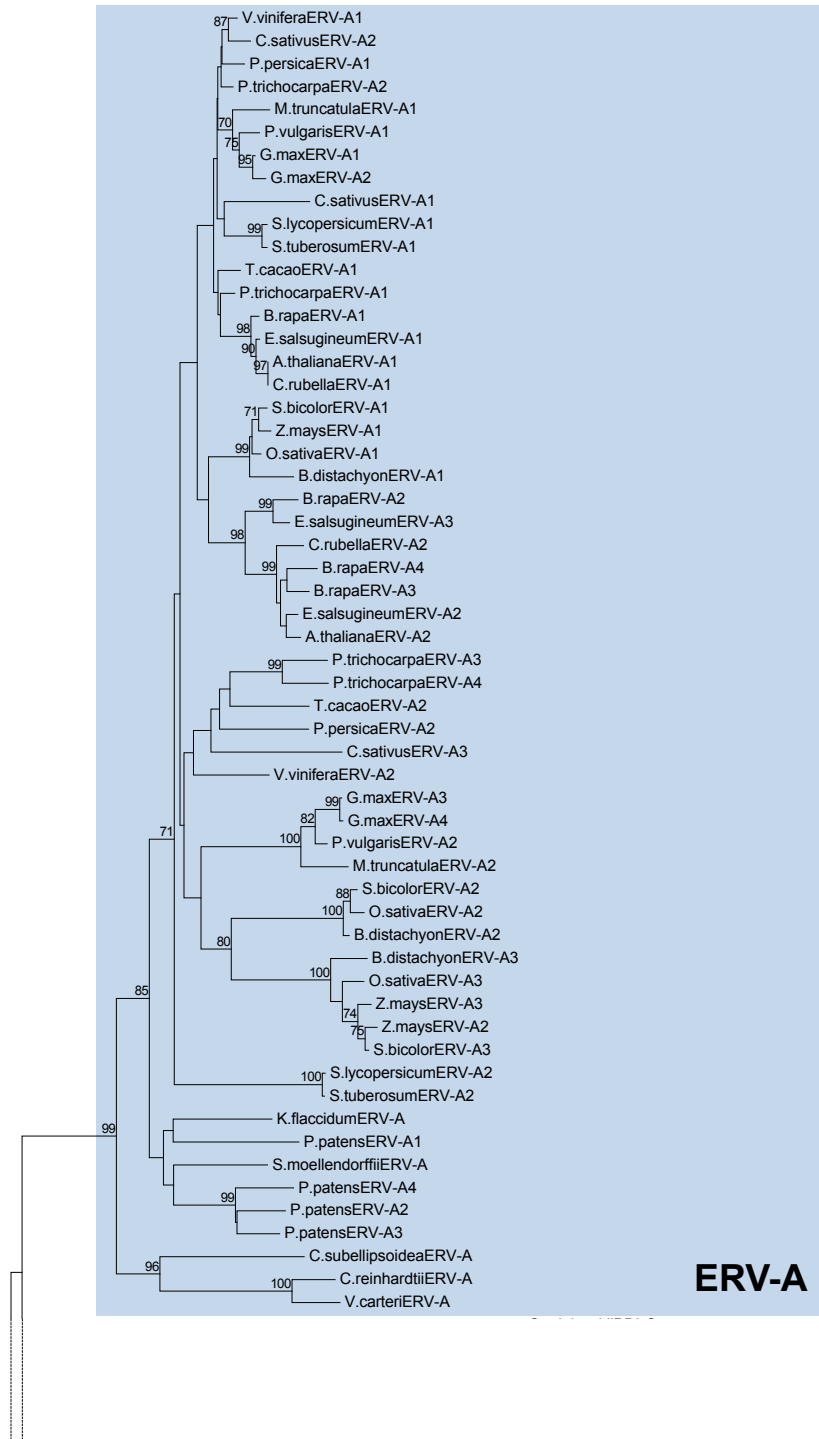

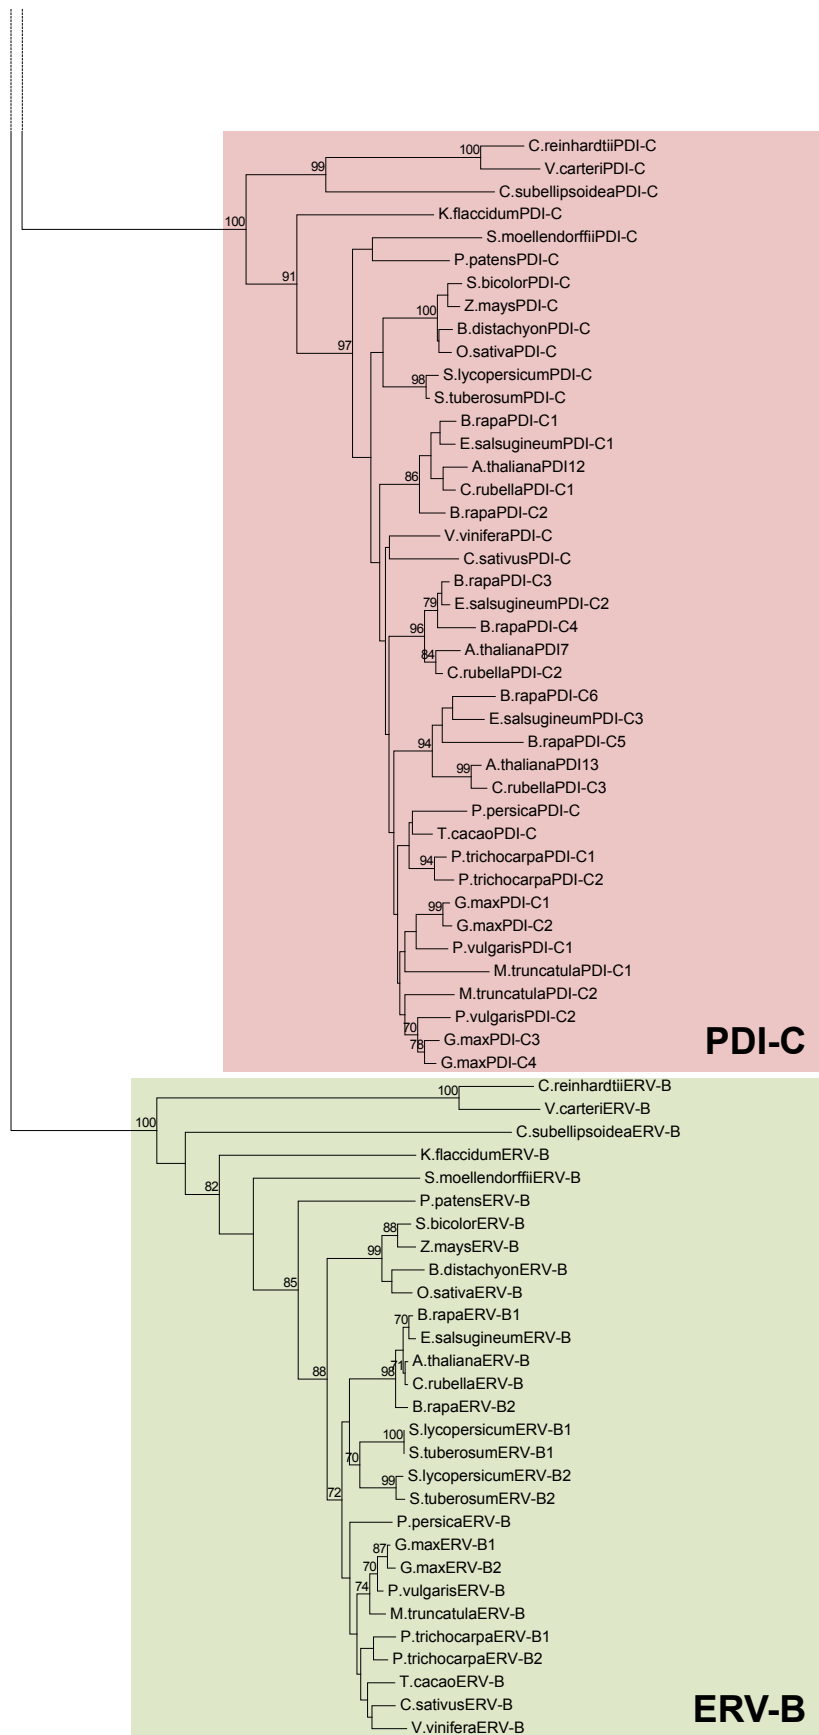

Supplement: 438_2015_1106_MOESM4_ESM.pdf [file 438_2015_1106_MOESM4_ESM.pdf]
