# Supplementary material for: Phylogenetic characterization and promoter expression analysis of a novel hybrid protein disulfide isomerase/cargo receptor subfamily unique to plants and chromalveolates
Source: PubMed Central journal article supplement (PMC4729789; doi:10.1007/s00438-015-1106-7), 2015-08-25
Supplement: 438_2015_1106_MOESM5_ESM.pdf [file 438_2015_1106_MOESM5_ESM.pdf]

### ERGIC-N

```
ScERV46p 1 --MKRSTLLSLDAFAKTEEDMVRVRTRAGGLITLSCILTTLLFLLVNEWGQFNSVVRPQLV
AtERV-A1 1 MAGILNKLRLNDAYPKINEDFYRSRTLSGGVITLLSSVVMFLLFFSEIRLYLHTVTETKLI
AtERV-A2 1 MGVGMNRLRLNDAYPKINEDFYRSRTLSGGVITASSIVMLTLFFSEIQLYIHPVTEIQIR
ScERV41p 1 ---MAGLKTFDAPPKTEEQYKKKSTKGGITSLITYLFLFLAWTEFGEYFGGYIDQOYV
AtERV-B 1 -MGVKQALRSIDAFPRAECHLLQKTKSGAVVSVGLLIMATLFLHELISYLNLTIVHQMS
AtPDI7 1 -MVSTSKIKSVDFYRKIPRDLTEASLSGAGLSIAAALSMIFLFGMELNNYLAVSTSTSVI
AtPDI12 1 -MVSSIKLKSVDYRKIPRDLTEASLSGAGLSIVAALFMFLFGMELSSYLEVNTTTAVI
AtPDI13 1 -MVSTSKIKSVDFYRKIPRDLTEASLSGAGLSIVAALAMFLFGMELSSYLAINTSTSVI
```

```
ScERV46p 1 -----#####EEEE#####HHHHHHHHHHHHHHHHHHHH#####EEEE
AtERV-A1 1 ###HHHHHH#####EEEE#####HHHHHHHHHHHHHHHHHHHH#####EEEE
AtERV-A2 1 ###HHHHHH#####EEEE#####HHHHHHHHHHHHHHHHHHHH#####EEEE
ScERV41p 1 ----#####EEEE#####HHHHHHHHHHHHHHHHHHHH#####EEEE
AtERV-B 1 -#####HHHH#####EEEE#####HHHHHHHHHHHHHHHHHHHH#####EEEE
AtPDI7 1 -#####HHH#####EEEE#####HHHHHHHHHHHHHHHHHHHH#####EEEE
AtPDI12 1 -###HHHH#####EEEE#####HHHHHHHHHHHHHHHHHHHH#####EEEE
AtPDI13 1 -###HHH#####EEEE#####HHHHHHHHHHHHHHHHHHHH#####EEEE
```

All-beta region

### ERGIC-N

```
ScERV46p 59 VDRDR-HAKLEINMDVTFPSMPCDLVNLDIMDPSGEMQLDILLDAGFTMSRLNSEGRPVG-
AtERV-A1 61 VDTSR-GETLRINFDITFPALACSIISVDAMDISGELHLDV-KHDIKRRRLDSNGNTIEA
AtERV-A2 61 VDTSR-GEKLRINFDVTFPALQCSIISLDSMDISGERHLDV-RHDIKRRRLDSSGNVIEA
ScERV41p 57 VDSQV-RDTVQINMDI-YVNTKCDWLNINVRDQIMDRKLV-----
AtERV-B 60 VDLKR-GETLPTFHVNMTFPSLPCDVLSDVAIDVSGKHEVDL-DTNIWKLRNLNSHGHIIGT
AtPDI7 60 VDRSADGDFLRIDFNISFPALSCEFASVDVSDVLTGNRLNV-TKTIKRFSDSNMRPTGS
AtPDI12 60 VDKSSDGDFLRIDFNISFPALSCEFASVDVSDVLTGNRLNI-TKTIKRFPIIDPHLRSTGA
AtPDI13 60 VDKSSDGDFLRIDFNISFPALSCEFASVDVSDVLTGNRLNI-SKTIKRVPIIDPHLRATAE
```

```
ScERV46p 59 E####-#####EEEEEEEE#####EEEEEE#####EEEE#####EE-
AtERV-A1 61 E####-#####EEEEEEEE#####EEEE#####EE##-###EEEE#####
AtERV-A2 61 E####-#####EEEEEEEE#####EEEE#####E##-###EEEE#####
ScERV41p 57 EE###-#####EEEEEEEE-EE#####EEEEEEEE#####EEEE#-----
AtERV-B 60 EE###-#####EEEEEEEE#####EEEEEE#####EEBE#-###EEEE#####
AtPDI7 60 EE#####EEEE#####EEEEEE#####EEBE#-###EE#####
AtPDI12 60 EE#####EEEE#####EEEEEE#####EEBE#-###HHHH#####
AtPDI13 60 EE#####EEEE#####EEEEEE#####EEBE#-###HHHH#####
```

All-beta region

COPII-coated Erv

```
ScERV46p 117 ---DATELHVGGNCIDGT-----APVNNDPNYCGPCY-----
AtERV-A1 119 R-QDGLGATKIENPLQK-----HGGRLGHNETYCGSCY-----
AtERV-A2 119 K-QDGLGHTKIEKPLQK-----HGGRLGHNETYCGSCF-----
ScERV41p 96 ---EEIQLEEM-----PFIFIPY-----
AtERV-B 118 EYISDLVEKGHGHHGHS-----
AtPDI7 119 EFHAGEVLSLINHGDET-GEEIVEDSVPLTGRNFDFTTHQFPIILVVNFYAPWCYWCNLLK
AtPDI12 119 EFHSGALHNINHGDET-KEEFPDGAIPLTSASFEALSHPFPIILVVNFYAPWCYWSNRLK
AtPDI13 119 EFHSTSDLHLINHGDEDHGDNSTYADIPLTGAAFEKFTTHFQILVVNFYAPWCYWSNRLK
```

Thioredoxin

```
ScERV46p 117 -----#####
AtERV-A1 119 -----#####
AtERV-A2 119 -----#####
ScERV41p 96 -----#####
AtERV-B 118 #####
AtPDI7 119 #####HHHH#####E#####HH
AtPDI12 119 #####HHHH#####EEEE#####HH
AtPDI13 119 #####E#####HHHH#####HHEEE#####HH##
```

### COPII-coated Erv

C<sub>5</sub> C<sub>6</sub>

```
ScERV46p 145 -----CAKDQSQNENLAQEEKVVCCQDCDAVRSAYLE-----AGWAFDFG-
AtERV-A1 151 -----GAEAEEDHCCNSCEDVREAYRK-----KGGVVTNP-
AtERV-A2 151 -----GAEASDDACCNSCEEVREAYRK-----KGWALSDF-
ScERV41p 110 -----DTKVNDINEIITPELID-----
AtERV-B 135 -----HKHDGKKEEHKNETETEAL-----
AtPDI7 178 PSWEKAAKQIKERYDPEMDGRVILAKVDCTQEGDLCKRNHIQGYPSIRIFRKGSDLKDDN
AtPDI12 178 PSWEKAAANI IKQRYDPEADGRVLLGNVDCTEEPALCKRNHIQGYPSIRIFRKGSDLRDHD
AtPDI13 179 PSWVKASQITRERYNPGTDDRVLVLLGSVDCTEETLCKSNHIQGYPSIRIFRKGSDLRDHD
```

### Thioredoxin

```
ScERV46p 145 -----#####HHHHHHHHHHHHHH-----#####-
AtERV-A1 151 -----#####HHHHHHHHHH-----#####-
AtERV-A2 151 -----#####HHHHHHHHHHHHHH-----H#####-
ScERV41p 110 -----#####HHHHHH#####-
AtERV-B 135 -----#####HHHHHHHH-----
AtPDI7 178 HHHHHHHHHHH#####EEEEEEE#####HHHHH#####EE#####
AtPDI12 178 HHHHHHHHHHH#####EEEEEEE#####HHHHHHHH#####
AtPDI13 179 #HHHHHHHHHHHH#####EEEEEEE#HHHHHHHH#####HHHH#####
```

### COPII-coated Erv

C<sub>7</sub>

C<sub>8</sub>

```
ScERV46p 184 -----KNIEQCEREGYVSKINEEHL-----NEGCR
AtERV-A1 181 -----DLIDQCKREGFLQRVKDEE-----GEGCN
AtERV-A2 181 -----ESIDQCKREGFVQVKVDEE-----GEGCN
ScERV41p 126 -----EILGEAIPAERREKLDTRSFDES DPNKAHLPEFNGCH
AtERV-B 153 -----NILGFDQAAETMLKVKVQA-----LADGEGCR
AtPDI7 238 AHHDHESYYGDRDTESLVMVSLVEPIHLEPHNLALDCKS--DNSSRTLKKAPESTGGCR
AtPDI12 238 GHHEHESYYGDRDTSIVK MVEGLVAPIHPETHKVALDGKS--NDTVKHLKKGVPVTGGCR
AtPDI13 239 GNHEHESYYGDRDTSLVK MVEELLKPKKEDHKLALDGKS--DNAASTFKKAEVSGGCR
```

### Thioredoxin

```
ScERV46p 184 -----#####-----##EE
AtERV-A1 181 -----#####-----##EE
AtERV-A2 181 -----#####-----##E
ScERV41p 126 -----#####HHHHHHHHHH#####EE
AtERV-B 153 -----HHHH#####-----##EE
AtPDI7 238 #####-----#####
AtPDI12 238 #####HHHH#####-----##HH
AtPDI13 239 #####-----#####HHHH#####
```

### COPII-coated Erv

```
ScERV46p 208 IKGSAQLNRIQGNLHFAPGKPYQNAVYGHFHDTSLVDKTSNINFNHINHL SFGKPIQSHS
AtERV-A1 205 IYGFLEVNKVAGNEHFAPGKSFHQSGVHVHDLLEFQK-DSFNISHKINRLTYG-----
AtERV-A2 205 VHGFLVNKVAGNEHFIPGQSFHQSGFQFHDMLLEFQQ-GNYNISHKVNRLAFG-----
ScERV41p 164 VFGSIPVNRVSGELQITAKSLGYVASR-----KAPLEEIKFNHVINEF SFG
AtERV-B 180 VYGVLDVQRVAGNEHISVHGLNIYVAQMI----FGGSKNVNVSHMIHDL SFG
AtPDI7 296 VEGYVRVKVPGNLMVSARSGSHS-----FDS-SQNMMSHVNVHLSFGRRITMPQ-
AtPDI12 296 VEGYVRVKVPGNLMVISAHSGAHS-----FDS-SQNMMSHVNVSHFSFGRMISPR-
AtPDI13 297 IEGYVRRAKVPGEELVISAHSGAHS-----FDA-SQNMMSHIVHLLTFGTMVSR-
```

```
ScERV46p 208 EEEEEEEEEEEEEEE#####EEE#####EEEEEEEE#####
AtERV-A1 205 EEEEEEE#####EEEEEE#####EEEEEE#####
AtERV-A2 205 EEEEEEE#####EEEEEE#####EEEEEE#####
ScERV41p 164 EEEEEEE#####EEEEEE#####EEEEEE#####
AtERV-B 180 EEEEEEE#####EEEEEE#####EEEEEE#####
AtPDI7 296 #####EEEE#####-----##E#####
AtPDI12 296 EHHHHH#####EEEE#####-----##EEEEEEEE#####
AtPDI13 297 EEEEE#####EEEE#####-----##EE#####
```

### All-beta region

### COPII-coated Erv

```

ScERV46p 268 KLLGNDKRHGGAVVATSPLDGRQVFPDRNTHFH-QFSYFAKIVPTRY--EYLDNVV----
AtERV-A1 257 -----DYFPGVV--NPLDKVEW-SDTPNA--MYQYFIKVVPVTVY--TDIRGHT----
AtERV-A2 257 -----DFFPGVV--NPLDGVQVNOGKQSG--VYQYFIKVVPSTIY--TDVHONT----
ScERV41p 210 -----DFYPYED--NPLDNTAQFNQDEPLT--TYVYVTSVVPVLE--KKLGAEVDTNQ
AtERV-B 228 -----PKYPGTH--NPLDNTNRTLHDTSG--TFKYYIKIVPTEY--RYLSKIDV----
AtPDI7 344 KFSEFKRLSPYLGLSHDRLDGRSFINORDLGPNVITIEHYLQLVKTEV--VKSNGQA----
AtPDI12 344 LLTDMKRLLPYLGLSHDRLDGKAFINQHEFGANVTIEHYLQTVKTEVITRRSGQEH---
AtPDI13 345 LWTDMKRLLPYLGQSYDRLENGKSFINERQLDANVTIEHYLQLIKTEVISRRSGQEH---

```

```

ScERV46p 268 #####E###E-#####E-----EE###E---
AtERV-A1 257 -----#####E-E#####-#####E---EE###E---
AtERV-A2 257 -----#####E#####-#####E---EE###E---
ScERV41p 210 -----#####E###E#####-#####E---EE###E###E
AtERV-B 228 -----#####E###E#####-#####E---EE###E
AtPDI7 344 #####E#####E#####E#####E#####E---E#####E---
AtPDI12 344 #####E#####E#####E#####E#####E---E#####E---
AtPDI13 345 #####E#####E#####E#####E#####E---E#####E---

```

### All-beta region

### COPII-coated Erv

```

ScERV46p 321 IETAQFSATFHSSRPLAGGRDKDHPNTHLVRGGIIPGMFVFEEMSPILKVINKEQHGQTTWSSGFI
AtERV-A1 299 IQSNQFQSVTEHVKSSAAGQLQS-----LPGVFFFYDLSPIKVFTTEEHSIFSLHF
AtERV-A2 299 IQSNQFQSVTEHVFQNMEAGRMQS-----EPGVFFFYDLSPIKVIFEEQH-VEFLHF
ScERV41p 257 YSVNDYRRLYLKDVAAKGDK-----MPGIFFKYNFEPLSIVVSDVR-LSFIOF
AtERV-B 270 LSTNQYSVTTEYFHPMTEFD-RT-----WEAVYFYDLSPITVTIKEER-RSFLHL
AtPDI7 398 -LVEAYEYTAHSSVAHSY-----LPVAKFHFELSPMQVLITENS-KSFSHF
AtPDI12 400 SLIEBYEYTAHSSVAQTY-----LPVAKFHFELSPMQVLITENP-KSFSHF
AtPDI13 401 SLIEBYEYTAHSSVARSYH-----YPAKFHFELSPMQVLISENP-KSFSHF

```

```

ScERV46p 321 #####E#####E#####E#####E#####E###E#####E####HHHH
AtERV-A1 299 #####E#####E#####E#####E#####E###E#####E###-#####HHHH
AtERV-A2 299 #####E#####E#####E#####E#####E#####E###E#####E###-#####HHHH
ScERV41p 257 #####E#####E#####E#####E#####E#####E###E#####E###-#####HHHH
AtERV-B 270 #####E#####E#####E#####E#####E#####E###E#####E###-#####HHHH
AtPDI7 398 -#####E#####E#####E#####E#####E#####E###E#####E###-#####HHHH
AtPDI12 400 #####E#####E#####E#####E#####E#####E#####E#####E###-#####HHHH
AtPDI13 401 EE#####E#####E#####E#####E#####E#####E#####E#####E###-#####HHHH

```

### All-beta region

### COPII-coated Erv

C<sub>3</sub>

```

ScERV46p 381 IILNCITSIG-----GVLVAGTVMDKLFYKAQRSIWGKKSQ----
AtERV-A1 348 LTNVCAIVG-----GVFTVSGIIDAFTIYQGKAIKCKMEIGKFS
AtERV-A2 348 LTNVCAIVG-----GVFTVSGIIVDSFIYHGQRAIKCKMEIGKFN
ScERV41p 303 LVRVVAICSFVLYCASWIFTLDMALITIMCPKWSLRYPQDDKTKGILDRLDR---
AtERV-B 318 ITRLCAVLG-----GTFALTGMLDRWTFRTIETFNKKPSTRA--
AtPDI7 443 ITNVCAIIG-----GVFTVAGILDSILHESMTLMK-KLELGNF
AtPDI12 446 ITNLCAIIG-----GVFTVAGILDSIFHNTVRLVK-KVELGKNI
AtPDI13 447 ITNVCAIIG-----GVFTVAGILDSIFQNTVRMVK-KLELGNF

```

```

ScERV46p 381 #####-----#####HHHHHHHHHHHHHHHHHHHHHHH###----
AtERV-A1 348 #####-----#####HHHHHHHHHHHHHHHHHHHHHHH#####
AtERV-A2 348 #####-----#####HHHHHHHHHHHHHHHHHHHHHHH#####
ScERV41p 303 #####-----#####HHHHHHHHHHHHHHHHHHHHHHH#####
AtERV-B 318 #####-----#####HHHHHHHHHHHHHHHHHHHHHHH#####
AtPDI7 443 #####-----#####HHHHHHHHHHHHHHHHHHHHHHH-HHH#####
AtPDI12 446 #####-#####-#####HHHHHHHHHHHHHHHHHHHHHHH-HHH#####
AtPDI13 447 #####-----#####HHHHHHHHHHHHHHHHHHHHHHH-HHH#####

```
